# Supplementary material for: Single-cell and single-nucleus RNA-seq uncovers shared and distinct axes of variation in dorsal LGN neurons in mice, non-human primates, and humans
Source: eLife. 2021 Sep 2;10:e64875. doi: 10.7554/eLife.64875 (PMC8412930; doi:10.7554/eLife.64875)
Supplement: Supplementary file 2. — Result of differential gene expression analysis of M vs. P neurons in macaque and human dorsal lateral geniculate nucleus (dLGN) per donor. [file elife-64875-supp2.xlsx]

## Sheet: macaque_donor_deg
gene	Q18.27.001.Q17.27.002	Q18.27.001.Q18.27.003	Q17.27.002.Q18.27.003	AveExpr	F	P.Value	adj.P.Val
DDX3Y	0.00538282	-6.07918	-6.08456	1.34564	4253.06	0	0
LOC106992273	0.0155281	-6.53992	-6.55545	2.1708	5141.19	0	0
LOC106995245	-0.608185	9.09596	9.70414	7.56212	15323.2	0	0
LOC106995406	0.0317163	-6.48293	-6.51464	1.71877	3927.5	0	0
LOC106995407	-0.185175	-6.63216	-6.44698	3.18336	3882.77	0	0
LOC114676372	-0.0594876	-6.71081	-6.65132	2.29462	4192.28	0	0
NLGN4Y	-0.0347931	-7.22888	-7.19408	3.06422	5035.87	0	0
USP9Y	0.100812	-5.65936	-5.76017	2.99461	3117.67	0	0
UTY	-0.0157178	-6.53814	-6.52242	2.58143	4180.57	0	0
ANKRD30A	-0.73846	3.44404	4.1825	6.7385	1451.39	8.26262e-293	3.27778e-289
LOC114676365	0.0036984	-4.41218	-4.41588	0.933434	1303.92	4.42884e-276	1.5972e-272
LOC106995404	-0.0440973	-4.76875	-4.72465	1.53637	1213.78	3.66951e-265	1.21308e-261
LOC100425242	0.336304	2.55757	2.22127	8.6604	1096.04	5.3831e-250	1.64267e-246
CWH43	4.12553	4.32483	0.1993	2.57273	1074.56	4.16486e-247	1.18014e-243
MGAT5B	-0.318936	4.649	4.96794	4.99849	855.446	3.84951e-215	1.01807e-211
UTRN	0.48928	3.77837	3.28909	6.06534	782.877	2.16295e-203	5.36276e-200
FSTL5	-1.05021	-5.49475	-4.44454	4.26941	775.569	3.59181e-202	8.3816e-199
LOC107000534	-0.314965	-4.47595	-4.16099	1.57269	765.942	1.49168e-200	3.28751e-197
PTPN20	-0.199177	-4.48581	-4.28664	1.34588	742.39	1.53365e-196	3.2021e-193
PELI2	-1.52535	0.23336	1.75871	9.52373	719.914	1.22202e-192	2.42387e-189
LOC106997709	0.476219	6.46655	5.99033	5.53294	710.254	6.11153e-191	1.1545e-187
TBL1Y	0.0105702	-4.1353	-4.14587	2.10784	703.174	1.09658e-189	1.97734e-186
KCNB2	-5.51058	-3.42229	2.08829	5.34032	693.783	5.18758e-188	8.94745e-185
BACH2	-4.57765	-2.08561	2.49204	5.66377	691.153	1.53612e-187	2.53908e-184
LOC703029	-1.05371	4.32931	5.38302	4.56335	655.928	4.02181e-181	6.3818e-178
LOC106995400	-0.139344	-3.68287	-3.54353	3.2603	630.249	2.56462e-176	3.91302e-173
PDE10A	-1.42148	-0.362164	1.05932	9.48708	625.521	2.02177e-175	2.9705e-172
SDK2	4.10812	2.24038	-1.86774	4.1588	610.716	1.37466e-172	1.9476e-169
NELL1	3.99585	3.86935	-0.126498	4.00768	595.7	1.12321e-169	1.53647e-166
CPNE4	1.64923	6.23542	4.58619	5.68188	586.24	8.05459e-168	1.06509e-164
GRM8	-3.55801	2.37829	5.9363	4.38244	549.403	1.95335e-160	2.49966e-157
LOC114678430	1.71411	-2.71922	-4.43333	2.4396	540.096	1.57757e-158	1.95569e-155
LOC106997403	1.00851	4.63426	3.62575	3.55796	520.198	2.16078e-154	2.59751e-151
KDM5D	0.0421442	-3.07429	-3.11643	0.766538	518.958	3.9362e-154	4.59261e-151
LRRC7	-1.12756	-0.634048	0.493508	10.7416	517.774	6.98336e-154	7.91514e-151
GRIK1	-2.69057	-0.392641	2.29793	7.16827	476.795	4.44869e-145	4.90221e-142
DPP6	-0.69795	0.564428	1.26238	11.1402	475.909	6.96242e-145	7.46485e-142
THSD4	-2.52088	-0.489235	2.03164	8.13939	465.261	1.56323e-142	1.63193e-139
KALRN	1.23425	0.45713	-0.777121	10.1144	444.503	7.14888e-138	7.27169e-135
ITGA2B	0.207211	-3.04905	-3.25626	1.29829	442.442	2.10123e-137	2.08389e-134
ST8SIA6	-0.0210452	-3.79863	-3.77758	2.32472	439.42	1.0257e-136	9.92424e-134
TMEM132C	3.85673	0.0728498	-3.78388	4.78896	434.268	1.55011e-135	1.46411e-132
LOC106997684	3.57045	3.45971	-0.110744	2.25234	415.47	3.5434e-131	3.269e-128
ARHGEF28	-0.608649	-4.32294	-3.71429	2.45972	413.796	8.74947e-131	7.88844e-128
NELL2	-1.24935	0.0896552	1.33901	8.77358	413.141	1.24627e-130	1.09866e-127
LOC106994258	-2.86312	-0.00599829	2.85712	1.29783	412.109	2.17875e-130	1.87894e-127
LOC114676890	0.757034	3.03814	2.2811	2.33044	410.596	4.94679e-130	4.1753e-127
LOC114671293	-2.95493	0.347387	3.30231	1.92995	399.511	2.09856e-127	1.73437e-124
RUFY4	0.0213067	-2.72741	-2.74872	0.695123	393.713	5.1229e-126	4.14746e-123
LDB2	3.79787	3.7898	-0.00807089	2.83923	385.646	4.51901e-124	3.58538e-121
SPOCK3	-0.964231	0.179284	1.14352	10.0374	380.126	9.93102e-123	7.57622e-120
LOC114672200	-0.805635	-4.28064	-3.475	1.79385	379.61	1.32707e-122	9.93296e-120
CIT	-1.51317	-0.18419	1.32898	8.00457	369.976	3.06662e-120	2.21187e-117
MYT1L	1.4165	0.883996	-0.532506	9.31442	367.607	1.18004e-119	8.35935e-117
EGFLAM	-0.174925	4.28326	4.45819	4.73469	366.966	1.70042e-119	1.18344e-116
VAV3	-0.167579	1.82191	1.98949	8.75923	366.328	2.44707e-119	1.67371e-116
ACOX2	-3.26736	0.824063	4.09142	3.05207	356.143	8.46334e-117	5.59568e-114
PLEKHA7	-1.52135	-0.298545	1.2228	7.75655	344.629	6.84307e-114	4.45024e-111
CLSTN2	3.88364	0.355365	-3.52827	5.08955	339.103	1.75734e-112	1.12442e-109
TDRP	0.106411	-2.68592	-2.79233	0.909803	337.665	4.10499e-112	2.58484e-109
GRM5	-4.04607	-0.862851	3.18322	4.15374	333.949	3.70091e-111	2.29399e-108
HPSE2	0.761249	2.83876	2.07751	8.805	333.31	5.40579e-111	3.29919e-108
SORCS1	-1.3944	-0.826756	0.56764	8.6641	331.924	1.23146e-110	7.40179e-108
COL27A1	3.2953	0.512564	-2.78274	6.32336	331.025	2.10255e-110	1.2449e-107
PRKCA	-2.42855	-1.79655	0.631997	7.20022	327.718	1.51134e-109	8.81692e-107
RPS4Y1	0.0501853	-2.35239	-2.40257	0.671229	325.651	5.20724e-109	2.99379e-106
MLPH	-4.1579	-2.71084	1.44707	3.28332	325.277	6.51215e-109	3.69053e-106
VWC2	-2.50922	2.21485	4.72407	4.5823	323.917	1.4727e-108	8.22843e-106
EYA4	-1.09556	3.45385	4.54941	4.41094	322.036	4.5623e-108	2.5137e-105
LOC114670306	1.85544	2.54323	0.687786	1.8547	316.674	1.16234e-106	6.31642e-104
PRICKLE1	-1.08292	0.153946	1.23686	8.74638	310.477	5.0353e-105	2.69933e-102
PLCXD3	-0.153251	4.49147	4.64472	4.56375	310.104	6.32456e-105	3.34527e-102
CFAP70	1.68976	-2.03837	-3.72813	3.66711	308.195	2.03317e-104	1.06126e-101
RGS4	2.95881	3.02314	0.064334	1.61927	307.321	3.47181e-104	1.78866e-101
LOC106995512	0.637692	4.06108	3.42339	3.99209	306.424	6.02095e-104	3.06219e-101
LOC106998194	-3.18966	-0.436029	2.75363	4.96359	304.243	2.29948e-103	1.15469e-100
UNC13C	-1.54246	-0.933515	0.608942	8.84901	301.541	1.21575e-102	6.02861e-100
ARHGAP6	-0.887432	3.0609	3.94834	5.12664	300.976	1.72367e-102	8.44174e-100
LOC106998573	1.00829	-2.77565	-3.78394	4.21724	299.012	5.80951e-102	2.81053e-99
PRKG1	-1.4266	-0.613639	0.812961	10.5958	296.906	2.14523e-101	1.02532e-98
C8H8orf34	-2.19657	-3.60992	-1.41335	6.50689	296.064	3.62055e-101	1.70985e-98
KCNK13	-3.183	0.0617577	3.24475	2.85207	293.099	2.29601e-100	1.07156e-97
TRPM4	-2.48884	-0.46825	2.02059	5.5096	292.712	2.92343e-100	1.34852e-97
LOC114673268	1.47651	-0.0577676	-1.53428	6.40309	291.543	6.07011e-100	2.76783e-97
LOC114680328	-0.0484703	-1.60141	-1.55294	0.417856	291.334	6.91656e-100	3.11795e-97
LRRC3B	-3.1231	0.336073	3.45917	2.13196	291.112	7.94839e-100	3.54284e-97
LOC106998607	-2.96682	0.0921899	3.05901	1.69485	288.521	4.03191e-99	1.75765e-96
PDZRN4	-2.73648	2.26707	5.00355	4.95844	288.065	5.37103e-99	2.31596e-96
LOC106993924	0.607242	4.04069	3.43345	3.4149	285.342	2.97961e-98	1.25746e-95
LOC106994241	0.0801999	-3.04252	-3.12272	1.18221	282.266	2.07967e-97	8.5938e-95
LOC114680137	0.213268	-1.30715	-1.52042	0.525064	279.822	9.79528e-97	4.00597e-94
PTPRZ1	-2.93701	0.265761	3.20277	5.58421	277.488	4.32086e-96	1.74907e-93
LOC106995415	-0.00858684	-2.83468	-2.82609	0.725319	271.388	2.1362e-94	8.4743e-92
COL8A1	0.093393	-2.21202	-2.30541	1.07365	268.563	1.3143e-93	5.16222e-91
GBP7	0.0401455	-2.44198	-2.48213	0.920167	265.363	1.03796e-92	4.03685e-90
LOC114670596	-2.30483	0.110074	2.41491	1.11034	263.958	2.57822e-92	9.92992e-90
TMEM132B	1.88415	0.204855	-1.6793	8.42323	263.728	2.99296e-92	1.14164e-89
DNAH11	1.32064	3.61306	2.29241	3.61663	262.522	6.55006e-92	2.47467e-89
VPS28	-0.424082	2.748	3.17209	5.91595	262.465	6.79558e-92	2.54321e-89
RPH3A	2.77842	1.76702	-1.01139	3.3716	260.335	2.71735e-91	1.00745e-88
MAPK4	2.74321	-1.84236	-4.58558	4.86143	259.98	3.42458e-91	1.2579e-88
FAM160A1	-2.85455	0.109166	2.96372	3.06055	258.848	7.16654e-91	2.60823e-88
SGK1	-1.48203	0.524901	2.00693	7.57867	257.237	2.05315e-90	7.40441e-88
LOC106998865	0.314268	-2.56175	-2.87601	0.984456	255.845	5.10995e-90	1.82623e-87
EPHB6	-0.277751	3.68982	3.96757	3.79601	255.79	5.29721e-90	1.87625e-87
HSD17B12	-2.54045	0.0345732	2.57502	5.80212	251.126	1.13751e-88	3.99336e-86
NBPF1	0.0722797	2.13066	2.05838	5.3959	242.992	2.50744e-86	8.64959e-84
TMTC2	-0.684927	1.9064	2.59133	5.58151	242.866	2.72669e-86	9.32483e-84
RPGR	-0.583324	2.43088	3.01421	5.73852	242.286	4.01623e-86	1.36174e-83
PDE1C	-2.36512	0.0664722	2.43159	2.79953	241.323	7.64017e-86	2.56852e-83
BCL2	-3.68097	-1.49562	2.18535	3.57753	240.125	1.70376e-85	5.67969e-83
NECTIN3	0.253418	-2.39544	-2.64886	0.951602	239.448	2.68105e-85	8.86311e-83
LOC695148	1.14241	1.08298	-0.0594329	0.488784	238.086	6.68415e-85	2.19141e-82
SEPTIN14	1.07511	2.90344	1.82833	1.92834	237.692	8.70966e-85	2.83207e-82
TNNI3K	1.90141	-2.46469	-4.3661	3.59527	237.199	1.21336e-84	3.91332e-82
SHC3	-2.67385	0.843796	3.51765	3.36241	234.58	7.0789e-84	2.26468e-81
LOC114672447	3.40134	1.32466	-2.07668	4.96947	232.768	2.40904e-83	7.64534e-81
FRAS1	-1.11831	-0.0838398	1.03447	8.75785	232.689	2.54019e-83	7.99756e-81
LOC701661	0.313647	2.87124	2.5576	2.52128	232.545	2.80073e-83	8.74842e-81
PLCE1	-2.50186	1.32457	3.82643	4.52925	231.42	5.99955e-83	1.85939e-80
NRXN3	-2.19693	-0.947589	1.24934	7.10279	229.585	2.08447e-82	6.41014e-80
LOC106993196	-1.94769	2.4891	4.43679	8.89775	227.949	6.34485e-82	1.93616e-79
TNS3	2.7547	0.976972	-1.77773	4.17067	224.281	7.76212e-81	2.33275e-78
PRR16	-1.50352	-4.23926	-2.73574	2.86694	223.16	1.67282e-80	4.95229e-78
FRMPD2	-0.076469	-2.23921	-2.16274	0.822147	221.557	5.0269e-80	1.4663e-77
LOC114670597	-1.89459	-0.0139578	1.88063	0.792875	218.986	2.95201e-79	8.54791e-77
SLC5A8	-0.0183189	-2.39233	-2.37401	0.900556	218.966	2.99306e-79	8.60396e-77
LOC100499503	1.14164	1.94426	0.802624	1.58829	217.787	6.75199e-79	1.92699e-76
LOC106998975	-2.63126	-0.746812	1.88445	5.50327	214.972	4.74201e-78	1.34368e-75
SLCO3A1	1.26282	0.445243	-0.817579	9.16809	214.875	5.07069e-78	1.42663e-75
CLTCL1	2.15232	-1.12177	-3.27409	4.12182	213.727	1.12493e-77	3.14267e-75
TMCC3	1.36495	-2.17486	-3.53982	4.08452	212.949	1.93235e-77	5.36058e-75
SEMA3D	-2.39647	0.468955	2.86542	1.95769	210.673	9.43834e-77	2.60013e-74
PTCHD4	-0.499283	0.756121	1.2554	9.50202	210.61	9.85996e-77	2.69755e-74
DNHD1	1.15913	3.94417	2.78504	4.69108	210.025	1.4836e-76	4.03114e-74
ZNF536	1.94695	-1.45091	-3.39786	2.8852	209.988	1.5229e-76	4.10976e-74
SRGAP1	1.52929	3.51562	1.98633	4.57403	201.502	5.93012e-74	1.56832e-71
MEIS3	0.394567	3.25698	2.86241	2.7244	200.99	8.51818e-74	2.23786e-71
LOC701236	0.528355	2.41999	1.89163	1.97721	197.774	8.34326e-73	2.17748e-70
SEMA3E	-1.90452	1.09951	3.00403	6.1546	196.692	1.80135e-72	4.67057e-70
LOC106998669	-2.17569	0.215194	2.39088	2.39203	195.446	4.37782e-72	1.12771e-69
ELMO1	-0.788616	0.727462	1.51608	8.99805	193.706	1.51802e-71	3.88516e-69
CR1	0.217755	-2.10744	-2.3252	1.87242	193.371	1.92904e-71	4.8742e-69
LOC114679332	-0.73046	1.67982	2.41028	2.32975	193.045	2.43643e-71	6.1173e-69
LOC106997176	-0.422665	2.4578	2.88046	6.48338	192.25	4.30693e-71	1.07456e-68
LOC704750	1.95788	2.16901	0.211122	1.17491	191.515	7.29649e-71	1.80907e-68
LOC107000414	2.50187	1.20504	-1.29683	3.12944	191.372	8.08288e-71	1.9916e-68
INPP4A	0.580932	-0.654934	-1.23587	8.67154	191.179	9.2814e-71	2.2728e-68
SPRED1	-3.15338	-0.661237	2.49214	3.00829	190.923	1.11581e-70	2.71558e-68
LOC114672274	-2.58451	-0.498651	2.08585	5.66841	190.724	1.28688e-70	3.11284e-68
ZNF804A	-2.08339	-0.539234	1.54416	7.65782	190.532	1.47817e-70	3.55388e-68
GPR149	0.273882	-2.36888	-2.64276	1.39357	190.268	1.78692e-70	4.27031e-68
LOC107000617	0.396806	1.04292	0.646117	9.18588	189.44	3.24117e-70	7.6534e-68
LOC697042	1.06027	2.90225	1.84198	3.48341	189.262	3.68374e-70	8.64698e-68
PTPRM	2.03922	-0.185374	-2.22459	6.77082	187.15	1.6894e-69	3.91922e-67
LOC106999229	-3.19278	-1.19342	1.99936	3.79043	186.598	2.51709e-69	5.80541e-67
ANXA4	-2.15828	0.329751	2.48803	1.95827	185.479	5.65637e-69	1.29704e-66
LRFN2	1.69969	0.468177	-1.23151	8.20799	185.446	5.79529e-69	1.32126e-66
GALNTL6	-1.15679	2.95908	4.11588	6.59205	185.438	5.82873e-69	1.32129e-66
KCNA2	1.71589	0.522111	-1.19378	7.10907	184.265	1.36406e-68	3.07456e-66
TDRD1	-2.14279	0.246696	2.38948	1.40182	184.075	1.56514e-68	3.50786e-66
LOC114680581	-1.3252	0.314012	1.63921	6.53335	183.769	1.95458e-68	4.33174e-66
LOC114679320	1.21459	3.45879	2.24419	2.48835	180.439	2.20527e-67	4.86017e-65
MRVI1	-1.27302	1.12077	2.39379	6.90787	176.432	4.13902e-66	9.07155e-64
SPRED2	-2.23533	-0.190511	2.04482	4.44125	176.106	5.25673e-66	1.13953e-63
RDH13	0.804772	2.84114	2.03637	3.4087	175.94	5.93775e-66	1.28017e-63
LOC697141	0.352077	1.93257	1.58049	1.40057	175.08	1.11714e-65	2.39551e-63
LOC694684	0.00385803	-2.15562	-2.15947	0.768802	173.353	3.98672e-65	8.50286e-63
LOC114676245	0.00158345	-1.75701	-1.75859	0.572789	173.121	4.72917e-65	1.00324e-62
JAML	2.3862	-0.493158	-2.87936	3.08374	172.818	5.91663e-65	1.24847e-62
CYHYorf15B	0.065321	-1.41721	-1.48253	0.382831	171.236	1.90383e-64	3.99603e-62
LOC114672783	0.646227	-2.21748	-2.86371	1.52152	171.055	2.17618e-64	4.54364e-62
SLFN12	-1.06954	-1.41409	-0.344556	1.4005	170.356	3.65163e-64	7.5843e-62
AVIL	-0.176392	2.8255	3.00189	4.29201	170.078	4.48597e-64	9.26867e-62
SLC26A5	2.56737	1.66273	-0.904637	1.75651	169.937	4.98012e-64	1.02363e-61
PLCL1	2.27581	2.74213	0.46632	2.65456	169.644	6.18973e-64	1.2657e-61
CADM1	1.31592	1.42689	0.110968	8.2065	169.402	7.40635e-64	1.50672e-61
TNS1	2.10996	0.422298	-1.68766	5.93303	169.091	9.32891e-64	1.88815e-61
PLD1	1.10676	3.35779	2.25103	5.46192	168.672	1.27307e-63	2.56358e-61
MYO5B	-1.42469	-0.0277753	1.39691	7.57509	167.36	3.37654e-63	6.76503e-61
ADAM12	2.25033	-0.743369	-2.9937	5.088	166.971	4.51171e-63	8.99394e-61
SPOCK1	-0.783153	0.246272	1.02943	9.79671	166.565	6.10484e-63	1.2109e-60
CPNE9	1.39486	-0.0679293	-1.46279	7.12851	166.192	8.05908e-63	1.59057e-60
LOC114673511	-1.47285	0.114517	1.58737	0.838838	165.156	1.7454e-62	3.41085e-60
LOC714257	-2.00078	-1.89115	0.109622	3.04302	164.01	4.11118e-62	7.99463e-60
SLC35E4	2.09341	2.44793	0.354512	2.0597	163.975	4.22146e-62	8.16903e-60
LOC100428433	-0.00278227	-1.66889	-1.6661	0.891398	163.558	5.76529e-62	1.11024e-59
LOC710798	1.02983	1.22249	0.19267	0.772168	163.363	6.67037e-62	1.27218e-59
TNPO1	1.53379	-0.247957	-1.78174	6.45202	162.851	9.79143e-62	1.8585e-59
ADCY8	-1.4593	-0.213967	1.24533	8.01434	162.807	1.01185e-61	1.91143e-59
PLCH2	2.22017	2.06907	-0.151107	2.95218	162.297	1.48333e-61	2.78881e-59
HELQ	-0.606437	-2.77681	-2.17038	5.03668	162.237	1.55154e-61	2.90329e-59
LOC114679719	-1.52155	0.709607	2.23116	1.92787	161.559	2.57994e-61	4.78253e-59
IL6R	-0.525165	-2.71548	-2.19032	2.28934	160.929	4.14133e-61	7.64123e-59
LOC106995683	0.256593	-1.6177	-1.8743	1.77925	160.127	7.57022e-61	1.38392e-58
KCTD16	-0.955541	0.071474	1.02701	9.25046	159.698	1.04519e-60	1.90196e-58
SOD1	2.21427	0.903725	-1.31054	6.21021	159.453	1.25682e-60	2.27663e-58
KIF6	1.30667	3.032	1.72533	4.93874	159.329	1.38029e-60	2.48892e-58
LRRC4C	-0.0464036	2.79761	2.84401	5.53163	158.56	2.46412e-60	4.42316e-58
LOC106995676	1.21912	2.96659	1.74747	2.52128	157.065	7.61995e-60	1.36164e-57
SLC12A7	0.62544	-1.8307	-2.45614	1.20016	154.717	4.5125e-59	8.02739e-57
LOC106998719	1.89637	1.86308	-0.0332967	0.957399	153.428	1.20119e-58	2.11783e-56
RACGAP1	2.0837	-0.289276	-2.37297	4.16479	152.511	2.41253e-58	4.23474e-56
AASS	-2.8471	-0.503373	2.34373	2.91949	152.394	2.6382e-58	4.61046e-56
LOC718777	0.470713	1.79415	1.32344	1.52056	152.276	2.886e-58	5.02139e-56
FRMD4B	1.01527	2.93237	1.9171	3.65256	152.21	3.03437e-58	5.25648e-56
LOC114673074	2.00162	0.205099	-1.79652	1.3906	152.117	3.25787e-58	5.61911e-56
LOC713683	1.81218	3.53683	1.72466	4.16574	151.846	4.00657e-58	6.88054e-56
SPATA22	-1.501	-3.17481	-1.67381	2.05213	151.122	6.95572e-58	1.18937e-55
FGFR2	-1.92685	1.13519	3.06204	2.80892	150.758	9.18697e-58	1.56415e-55
ST8SIA2	1.14576	-1.87167	-3.01743	1.5782	149.56	2.29394e-57	3.83968e-55
TSPAN18	1.84357	-0.968655	-2.81222	2.83432	149.281	2.84016e-57	4.73399e-55
MYO1B	-0.335805	1.88703	2.22284	6.32933	149.074	3.32765e-57	5.52334e-55
LOC717098	-1.52176	-2.5019	-0.980143	4.1987	148.704	4.41763e-57	7.30197e-55
COL11A1	-2.02495	-1.83236	0.192585	6.23121	147.884	8.28234e-57	1.36332e-54
IL1RAPL2	0.430352	2.82506	2.39471	5.73685	147.557	1.06432e-56	1.74469e-54
LOC715898	-1.69046	-0.250742	1.43972	5.10531	147.199	1.40171e-56	2.2883e-54
BMP8B	1.47942	1.53437	0.0549489	0.805526	147.149	1.45585e-56	2.36694e-54
LOC693843	0.152969	1.54047	1.3875	6.6522	145.862	3.9169e-56	6.34218e-54
ACTN2	-2.23657	-1.03263	1.20394	5.48642	145.407	5.55665e-56	8.96065e-54
TAFA4	-2.77475	-0.311194	2.46355	3.31169	145.18	6.6207e-56	1.06333e-53
TDRD12	-0.373382	2.36711	2.7405	3.65705	145.013	7.5308e-56	1.20462e-53
POLR2E	-1.4826	1.42015	2.90275	3.56359	143.992	1.65418e-55	2.62485e-53
GALNT13	1.03818	2.51265	1.47447	6.99825	143.929	1.73618e-55	2.74399e-53
NCAM2	1.11111	-2.13519	-3.2463	5.05358	143.914	1.75757e-55	2.76677e-53
LOC106999761	2.65489	1.91699	-0.7379	3.88945	143.546	2.33472e-55	3.66081e-53
CFAP43	-0.00438052	-2.9683	-2.96392	3.935	143.42	2.57228e-55	4.01741e-53
NXN	1.61372	0.0780739	-1.53565	5.15245	142.956	3.68208e-55	5.72817e-53
ZFPM2	0.948021	1.79267	0.844646	4.03314	141.844	8.70783e-55	1.33891e-52
CCDC60	2.91352	1.53014	-1.38338	2.85187	141.668	9.97776e-55	1.52825e-52
LOC114674454	-0.0948259	-1.55039	-1.45557	0.573455	141.376	1.25081e-54	1.90845e-52
LOC106999648	-0.449613	-2.3036	-1.85399	1.08439	140.987	1.69063e-54	2.56963e-52
BEGAIN	-0.617289	2.15136	2.76865	4.38856	140.793	1.96559e-54	2.97615e-52
TMEM132D	2.30747	-0.359108	-2.66658	3.69656	139.643	4.79842e-54	7.18315e-52
SPATC1	1.47037	2.0827	0.612327	1.80502	139.051	7.6047e-54	1.13413e-51
TMEM132A	0.783875	2.63937	1.8555	3.51158	138.473	1.19241e-53	1.77164e-51
CHST11	1.7812	0.172266	-1.60894	6.48319	138.441	1.22267e-53	1.80983e-51
LOC106999127	1.98359	3.43018	1.44659	3.56646	137.316	2.93771e-53	4.33231e-51
ADAMTS12	-1.97513	0.447516	2.42265	3.45726	136.71	4.71248e-53	6.92385e-51
TMC2	2.00312	1.48428	-0.518843	2.42136	136.68	4.82585e-53	7.06427e-51
MOV10	0.343074	2.50971	2.16663	3.12181	136.582	5.20759e-53	7.59504e-51
PYGM	-1.67078	0.852795	2.52357	1.559	136.482	5.63292e-53	8.18527e-51
LOC106998673	-1.07357	1.88078	2.95435	1.93165	136.24	6.80366e-53	9.85041e-51
COL6A6	-0.274655	2.83255	3.1072	3.21559	136.188	7.08492e-53	1.02203e-50
SHBG	0.913235	2.14074	1.22751	1.94067	136.128	7.42601e-53	1.06735e-50
KIAA0319	-1.49607	-0.721261	0.774809	6.86155	135.357	1.35733e-52	1.94388e-50
LOC114669927	-1.18601	-2.71149	-1.52548	2.96654	134.53	2.59303e-52	3.7002e-50
LOC106998193	-2.61408	-0.681401	1.93268	2.77742	133.859	4.3885e-52	6.21756e-50
STK25	0.602624	2.49357	1.89095	5.4524	133.177	7.49104e-52	1.05754e-49
SRSF5	-0.600215	1.00475	1.60496	6.97666	132.595	1.18395e-51	1.66551e-49
RSKR	0.392463	2.59682	2.20436	3.81376	131.412	3.00277e-51	4.20918e-49
LOC114672778	-1.47773	0.236892	1.71463	3.77866	130.374	6.80128e-51	9.4669e-49
CA12	2.19773	0.997696	-1.20003	1.53726	130.304	7.1866e-51	9.96826e-49
LOC710274	0.178072	1.65199	1.47392	1.38569	129.846	1.03161e-50	1.42592e-48
LOC114672162	-0.031577	-1.15058	-1.119	0.380724	129.223	1.68824e-50	2.31739e-48
LOC114679863	0.436092	-0.664251	-1.10034	0.561374	129.035	1.95737e-50	2.67755e-48
RPS4Y2	-0.00117608	-1.18096	-1.17979	0.282846	128.704	2.54276e-50	3.46636e-48
PNPLA4	0.709077	2.24477	1.53569	6.91758	127.211	8.29873e-50	1.12359e-47
LOC719000	0.00216994	2.32501	2.32284	3.69627	126.784	1.16434e-49	1.57106e-47
LOC106998674	-1.68604	0.0193846	1.70543	0.936971	126.699	1.2456e-49	1.67502e-47
LOC100428770	1.75646	1.82227	0.0658099	1.3302	126.232	1.80441e-49	2.41828e-47
ARID5B	-1.82105	0.0800986	1.90114	5.9944	125.818	2.50614e-49	3.33619e-47
MYO1D	-1.4961	-2.00665	-0.510558	6.21997	125.618	2.93807e-49	3.88511e-47
ROBO2	0.376419	3.04771	2.67129	5.42672	125.596	2.99053e-49	3.94134e-47
MYO15A	-1.34447	1.3368	2.68127	2.99871	124.863	5.35661e-49	7.03632e-47
ETV6	-0.914294	0.0900028	1.0043	8.00886	124.672	6.2376e-49	8.16652e-47
PDGFD	2.48916	0.101564	-2.38759	6.4909	124.412	7.67148e-49	1.00108e-46
LOC107000208	-2.11595	-0.0566786	2.05927	1.72739	124.374	7.90897e-49	1.02868e-46
PCED1B	-2.13213	-2.02765	0.104483	6.10889	124.187	9.17527e-49	1.18949e-46
TMEM108	-0.796286	0.254452	1.05074	9.32824	124.099	9.83982e-49	1.27148e-46
LOC106992802	2.07086	1.23764	-0.833222	1.43958	123.916	1.1392e-48	1.46727e-46
PLAT	0.617666	-2.08927	-2.70694	2.33846	123.859	1.19153e-48	1.52477e-46
HMGB1	1.52942	0.687628	-0.84179	7.25376	122.908	2.54405e-48	3.22436e-46
LHB	-0.0709735	-1.21445	-1.14347	0.38195	122.904	2.55313e-48	3.22556e-46
LOC114671808	1.03137	0.52982	-0.501555	8.25312	122.551	3.38341e-48	4.24746e-46
PHACTR1	1.95766	-0.721221	-2.67888	4.16388	122.349	3.97627e-48	4.96033e-46
SYN3	0.278109	1.13224	0.854133	9.5817	122.238	4.34634e-48	5.405e-46
ZFY	0.0103574	-1.03809	-1.04845	0.225196	121.86	5.87992e-48	7.28926e-46
SLC13A4	2.42046	1.64627	-0.774194	3.05268	121.224	9.7774e-48	1.20832e-45
TMEFF2	-0.232922	2.88491	3.11783	4.9375	121.216	9.84411e-48	1.21278e-45
PTPRG	-0.490518	0.687965	1.17848	8.81283	121.17	1.02099e-47	1.25396e-45
CTNNA1	1.44338	-0.92059	-2.36397	4.50777	121.085	1.09282e-47	1.33803e-45
TONSL	0.800639	2.3012	1.50056	1.76402	121.009	1.16193e-47	1.41827e-45
RPL37A	1.58182	2.34638	0.764563	4.65651	120.851	1.31808e-47	1.60394e-45
LOC106992627	-1.90552	0.447332	2.35285	1.53087	120.657	1.54089e-47	1.86933e-45
GPR63	2.01363	0.751488	-1.26214	6.24756	120.173	2.27115e-47	2.74685e-45
TEX48	1.75257	-0.619351	-2.37193	2.13016	120.156	2.30126e-47	2.7748e-45
LOC106993915	-0.535834	2.33453	2.87036	2.06249	120.128	2.35401e-47	2.8298e-45
LOC106998849	2.34863	1.03517	-1.31346	3.17474	119.986	2.63795e-47	3.16155e-45
ONECUT2	2.41925	0.958586	-1.46066	2.05136	119.957	2.7001e-47	3.2263e-45
CDH22	1.8383	-0.421066	-2.25937	1.60523	119.861	2.91649e-47	3.47439e-45
TNRC18	0.53923	1.08143	0.542195	6.53468	119.75	3.18844e-47	3.78699e-45
ARSD	-0.235009	1.59633	1.83134	6.81006	119.257	4.73412e-47	5.58936e-45
SMAD6	1.623	-0.50243	-2.12543	1.59275	119.125	5.26488e-47	6.19756e-45
ZNF521	2.46056	2.36461	-0.0959498	4.45264	118.877	6.42935e-47	7.54592e-45
SCN9A	1.49179	-0.78918	-2.28097	4.87709	118.649	7.71924e-47	9.03311e-45
ZBTB16	-0.790282	0.855655	1.64594	7.21654	117.748	1.59349e-46	1.85923e-44
LOC114676398	-0.0160235	-1.19178	-1.17576	0.410962	117.553	1.86417e-46	2.16867e-44
LOC106993535	2.43958	2.36016	-0.0794143	3.08292	117.284	2.31601e-46	2.68644e-44
LOC106997180	0.978106	-2.00077	-2.97887	1.90654	117.013	2.88108e-46	3.33214e-44
SCN2B	2.26334	0.226957	-2.03638	3.06586	116.888	3.18644e-46	3.67459e-44
CCDC192	0.885148	-1.53911	-2.42425	2.45703	116.49	4.39519e-46	5.05383e-44
BST1	0.393807	-2.08519	-2.479	1.7094	116.431	4.60685e-46	5.28191e-44
CLMP	-1.30173	0.133994	1.43573	7.47553	114.927	1.55322e-45	1.77568e-43
PLCH1	1.87522	1.64505	-0.230174	2.51954	114.441	2.30252e-45	2.61722e-43
LOC114673704	-0.0557218	-1.6077	-1.55198	0.57055	113.377	5.44998e-45	6.15957e-43
SAMD5	1.10205	1.54674	0.444687	6.97015	113.15	6.55396e-45	7.38623e-43
HACD4	0.455561	-1.91256	-2.36812	6.00116	113.132	6.6514e-45	7.47482e-43
UNC13A	-1.16541	-0.402923	0.762485	6.49491	112.784	8.82339e-45	9.88768e-43
LOC114679990	-0.886069	1.24918	2.13525	1.54373	112.526	1.08723e-44	1.21494e-42
LOC114678416	0.138945	-1.25245	-1.39139	0.449372	112.353	1.25224e-44	1.39541e-42
LOC106996136	0.676577	-1.36248	-2.03905	6.82545	112.316	1.2904e-44	1.4339e-42
TRAIP	0.441775	-1.38787	-1.82965	1.78479	112.257	1.35383e-44	1.50019e-42
MPPED1	-1.52447	0.275077	1.79955	1.15395	111.906	1.79938e-44	1.98833e-42
CNN3	1.59503	1.12533	-0.469699	4.21134	111.769	2.01275e-44	2.21179e-42
MAMU-DPB	-1.32141	-0.0244163	1.29699	0.583545	111.743	2.05539e-44	2.25242e-42
NUP210L	0.899429	1.3389	0.439473	3.63223	111.707	2.11585e-44	2.31228e-42
LTBP1	1.10868	2.40947	1.30079	6.60429	111.584	2.3395e-44	2.54967e-42
LOC699681	-1.50075	0.385009	1.88576	2.89811	111.296	2.95606e-44	3.20402e-42
LOC114676273	-0.129357	-1.95049	-1.82113	0.989394	110.443	5.92088e-44	6.36535e-42
FLOT2	1.75282	0.499284	-1.25353	5.16767	110.037	8.25023e-44	8.84559e-42
RHOC	0.0121776	2.38379	2.37161	1.99158	110.027	8.31408e-44	8.89001e-42
RBM20	1.86958	-0.952399	-2.82197	4.39924	109.874	9.42125e-44	1.00468e-41
KANK2	0.208422	-1.53506	-1.74348	1.62048	109.633	1.14648e-43	1.21933e-41
LOC114670787	0.921012	1.50154	0.580524	1.39305	109.353	1.4416e-43	1.52909e-41
LOC114679643	1.97465	2.8556	0.880957	3.49622	109.236	1.58576e-43	1.67752e-41
LOC711183	0.211996	1.75358	1.54159	1.34715	108.841	2.18984e-43	2.30427e-41
CC2D2B	1.89199	0.987172	-0.904816	5.47152	108.779	2.30298e-43	2.41691e-41
MKX	1.61147	-1.53803	-3.1495	3.23739	108.751	2.35641e-43	2.46646e-41
ATP10A	-1.3842	0.239474	1.62368	6.39759	108.437	3.04582e-43	3.17967e-41
C14H11orf53	1.93853	1.91243	-0.0260995	1.91889	108.232	3.60158e-43	3.74999e-41
OAF	-1.49054	0.13602	1.62656	1.04546	107.697	5.58085e-43	5.78048e-41
PPFIBP1	-1.10069	-0.175442	0.925246	7.36092	107.168	8.60657e-43	8.89122e-41
PPP4R4	1.05775	-0.0314916	-1.08924	7.53804	107.049	9.4907e-43	9.77912e-41
LOC114670414	1.07499	1.40583	0.330841	1.41589	106.715	1.24807e-42	1.27935e-40
PDE7B	1.27438	3.48878	2.21439	4.11725	106.606	1.36484e-42	1.39544e-40
LOC106996736	0.902729	2.56471	1.66199	4.70616	106.506	1.4811e-42	1.51042e-40
LOC722289	2.37343	1.24132	-1.13212	3.22321	106.277	1.7873e-42	1.81335e-40
IL5RA	0.5009	-2.23353	-2.73443	2.09776	105.665	2.95608e-42	2.98392e-40
LOC106997205	0.437007	-1.29309	-1.7301	0.806838	105.363	3.78934e-42	3.79604e-40
SH3RF3	2.15716	1.76668	-0.390481	4.64782	104.831	5.86839e-42	5.84922e-40
CNTNAP1	0.156015	1.51033	1.35431	6.49083	104.189	9.95287e-42	9.89549e-40
LOC114674912	1.48745	2.64027	1.15282	6.269	103.541	1.69804e-41	1.67983e-39
LOC114676847	1.33717	1.41053	0.0733653	0.614674	103.491	1.76977e-41	1.74211e-39
FARP1	1.31601	-0.300137	-1.61614	5.91166	103.476	1.79202e-41	1.75964e-39
FIBCD1	1.43729	1.41089	-0.0263912	0.950222	103.46	1.81528e-41	1.77808e-39
ZNF337	-0.322029	2.29894	2.62097	4.56808	102.561	3.81284e-41	3.7255e-39
PPA1	1.52941	-0.409588	-1.939	5.10624	102.477	4.0846e-41	3.98123e-39
CYP2C93	0.157491	1.60321	1.44572	7.14121	102.392	4.38223e-41	4.26086e-39
LOC114673210	1.50065	0.234027	-1.26663	3.56191	102.387	4.40132e-41	4.26896e-39
MYOM2	1.60223	1.2514	-0.350828	1.18086	102.289	4.77056e-41	4.61581e-39
ABCB1	-0.552326	2.25652	2.80884	2.44567	102.1	5.5788e-41	5.3847e-39
LOC114670405	-1.12278	0.135738	1.25851	0.930385	101.935	6.39385e-41	6.12667e-39
PPP1R1B	1.83321	1.96175	0.128533	1.75329	101.73	7.57835e-41	7.22676e-39
LOC715097	1.64539	1.86422	0.21883	3.10654	101.396	9.99067e-41	9.48158e-39
LOC114669773	-0.323094	-1.61961	-1.29651	1.92483	100.632	1.88022e-40	1.77169e-38
HFM1	-0.77274	1.78541	2.55815	3.01093	100.383	2.31063e-40	2.1721e-38
SLC7A8	1.43346	-0.0706109	-1.50408	6.1208	100.216	2.65532e-40	2.49023e-38
PER2	-1.30605	0.595618	1.90167	1.73979	99.9239	3.38217e-40	3.16441e-38
RPS6KA2	1.19888	0.17906	-1.01982	7.32708	99.5329	4.67875e-40	4.34674e-38
CFAP52	1.10968	2.17461	1.06493	2.9678	99.2288	6.02297e-40	5.5825e-38
LOC721116	-1.71676	-1.01906	0.697702	0.9991	98.9681	7.47955e-40	6.91641e-38
LOC704272	-1.35032	-1.90388	-0.55356	1.77736	98.889	7.98809e-40	7.36947e-38
RIPOR2	0.103755	-1.63305	-1.73681	1.89233	98.7195	9.1967e-40	8.4648e-38
LOC713027	-0.137913	1.91306	2.05097	2.98786	98.5875	1.02635e-39	9.42486e-38
CD58	-0.104226	-2.15114	-2.04691	1.50608	98.4114	1.18823e-39	1.08861e-37
CHL1	-1.58088	-0.100992	1.47989	1.26529	98.3847	1.21486e-39	1.11045e-37
GBP3	-0.190341	-2.03575	-1.84541	1.82351	98.294	1.31012e-39	1.19477e-37
SEMA3C	-1.65151	-0.207907	1.4436	1.7962	98.1665	1.45673e-39	1.32543e-37
TCN2	1.70555	2.03867	0.333116	4.09455	98.0647	1.58556e-39	1.43934e-37
RCSD1	1.73723	2.04822	0.310992	5.85983	98.0565	1.59641e-39	1.44588e-37
CHRNA3	2.10621	0.246151	-1.86005	2.99138	97.9921	1.68438e-39	1.52208e-37
LOC718752	-0.99472	-2.40819	-1.41347	1.94521	97.8171	1.94845e-39	1.75671e-37
UBE2D2	-0.172389	-1.05952	-0.88713	7.06769	97.6934	2.15985e-39	1.94288e-37
LOC712609	0.247535	1.82138	1.57384	2.9708	97.4601	2.62333e-39	2.34915e-37
SLIT3	-1.91265	-1.06903	0.84362	6.83864	97.1939	3.27478e-39	2.91933e-37
LOC106995459	-1.2079	1.10612	2.31401	1.85732	97.0977	3.54813e-39	3.14887e-37
PROX1	1.55009	0.326783	-1.22331	6.34366	96.8685	4.29559e-39	3.80371e-37
PTPN5	-1.20133	0.132717	1.33405	5.90438	96.4488	6.09643e-39	5.38631e-37
CAMKV	0.591292	-1.63595	-2.22724	1.43172	95.8987	9.65107e-39	8.50796e-37
CHSY3	0.830153	-2.335	-3.16516	5.36435	95.827	1.0247e-38	9.01324e-37
GPR157	0.0520297	-1.49445	-1.54648	1.19267	95.6649	1.17329e-38	1.02975e-36
LRRC43	1.58268	1.70372	0.121047	2.39821	95.1225	1.84661e-38	1.61355e-36
COQ4	0.899413	-1.13817	-2.03758	4.70509	94.9313	2.16687e-38	1.88923e-36
CDYL	1.61656	0.678091	-0.938466	5.80356	94.8738	2.27371e-38	1.97803e-36
RAB20	0.0464443	-1.56348	-1.60993	0.893531	94.4704	3.18734e-38	2.76678e-36
POMK	1.25486	-0.917254	-2.17211	4.92617	94.1835	4.05317e-38	3.50304e-36
AZIN2	1.96222	0.568335	-1.39389	4.28477	93.6203	6.49859e-38	5.59217e-36
LAMB2	-0.126997	2.05611	2.18311	2.19157	93.5675	6.79276e-38	5.83266e-36
FMN1	0.364602	-1.59779	-1.96239	6.17706	93.4098	7.75346e-38	6.6258e-36
TBC1D1	-1.26981	0.585946	1.85576	5.91718	93.4078	7.76657e-38	6.6258e-36
TRIM26	0.5803	-0.751811	-1.33211	7.42599	93.2179	9.10795e-38	7.75349e-36
SMAD3	0.41453	2.4889	2.07437	4.25354	93.2105	9.16512e-38	7.76881e-36
ATP2A3	1.60172	2.05079	0.449065	2.50535	93.0375	1.05979e-37	8.96417e-36
CRIM1	0.0486002	2.74683	2.69823	3.89866	93.0323	1.06441e-37	8.98408e-36
THSD7B	-0.727631	1.12841	1.85604	7.0079	92.9464	1.14395e-37	9.61609e-36
DTX1	1.95625	1.72261	-0.233637	4.38107	92.9462	1.14414e-37	9.61609e-36
NETO1	-0.0977216	-1.48286	-1.38514	0.863738	92.8779	1.21174e-37	1.01628e-35
LOC100499551	0.441956	1.05827	0.616312	0.683935	92.7737	1.32254e-37	1.10686e-35
ST6GAL2	-1.55353	0.280547	1.83408	1.22423	92.7333	1.36819e-37	1.14265e-35
LOC114673345	0.913077	1.15223	0.239156	0.776587	92.6967	1.41092e-37	1.17586e-35
DYTN	1.4823	1.81844	0.336134	1.34923	92.6766	1.43491e-37	1.19335e-35
RASGRF2	-0.25723	2.06259	2.31982	4.88757	92.5285	1.62504e-37	1.34865e-35
KCTD17	-0.0603141	1.24812	1.30844	5.80196	92.2355	2.07876e-37	1.72159e-35
CERS4	-0.279475	-1.90168	-1.62221	3.61626	92.1545	2.22538e-37	1.83919e-35
DOK7	-1.65598	1.00526	2.66124	2.74199	92.0792	2.37071e-37	1.95522e-35
CARMIL1	-1.97557	-1.9917	-0.0161303	3.83851	92.0622	2.40483e-37	1.97925e-35
PLEKHG4B	-1.44272	0.15944	1.60216	1.26732	92.0123	2.50798e-37	2.05987e-35
AMOT	-2.19842	-0.66391	1.53451	3.1326	91.8997	2.75707e-37	2.25977e-35
CFAP74	-0.915092	0.841356	1.75645	5.56903	91.8232	2.94031e-37	2.40499e-35
C1H1orf21	0.209766	1.22954	1.01977	7.66025	91.8121	2.96803e-37	2.42267e-35
PDLIM1	0.118613	-1.50368	-1.6223	1.18257	91.7804	3.04825e-37	2.48304e-35
GUCA1B	1.36633	1.52785	0.161524	1.02649	91.7715	3.07112e-37	2.49654e-35
MAT2A	1.22095	0.0594334	-1.16152	7.00475	91.755	3.11415e-37	2.52635e-35
MGAT3	0.420261	1.56539	1.14513	6.24851	91.7212	3.20377e-37	2.59375e-35
LOC695041	0.692595	-1.85245	-2.54505	5.24895	91.5491	3.70312e-37	2.99191e-35
LOC700465	-0.132066	1.07718	1.20925	1.18832	91.5448	3.71673e-37	2.9968e-35
DAPK1	0.311409	-1.96443	-2.27584	2.38166	91.4286	4.09857e-37	3.2913e-35
RCOR3	0.491905	-0.573461	-1.06537	7.54775	91.3564	4.35532e-37	3.49042e-35
VEGFD	1.74379	-0.2871	-2.03089	4.76074	91.2761	4.65999e-37	3.72705e-35
EPHA10	1.46662	-0.679032	-2.14565	3.81203	91.2636	4.7095e-37	3.75907e-35
CRH	1.25967	2.68518	1.42551	3.71412	91.2586	4.72904e-37	3.76709e-35
SLC6A1	1.5549	1.11107	-0.443826	0.89239	91.1629	5.12614e-37	4.07523e-35
KLHL32	0.667797	1.04116	0.373359	8.11518	91.0763	5.51407e-37	4.37487e-35
LOC106997448	2.01327	0.0079131	-2.00536	3.1048	91.057	5.60447e-37	4.43771e-35
DAAM2	2.07854	0.940245	-1.1383	5.19874	91.0335	5.71661e-37	4.51749e-35
NOS1AP	0.764023	-0.312556	-1.07658	7.8548	90.8736	6.54091e-37	5.15861e-35
LOC114678347	1.57591	2.23175	0.65584	3.653	90.7252	7.41247e-37	5.83438e-35
LOC114674206	-0.77452	1.24459	2.01911	2.3684	90.7228	7.42767e-37	5.83476e-35
TAF15	0.158409	-0.938203	-1.09661	7.00231	90.4992	8.96801e-37	7.01698e-35
COL23A1	1.42924	1.08639	-0.342849	2.93046	90.3026	1.05855e-36	8.26627e-35
LOC100424232	-1.17313	-0.471362	0.701763	6.09021	90.2639	1.09365e-36	8.52358e-35
LOC114670598	-0.970556	0.0311912	1.00175	0.439731	90.0564	1.30293e-36	1.01347e-34
TTC38	-1.29533	0.949756	2.24508	2.55362	89.9877	1.38074e-36	1.0698e-34
SH3BP4	-0.984937	1.50002	2.48496	3.41405	89.9445	1.43192e-36	1.1073e-34
PTK2B	0.93935	-1.17387	-2.11322	5.8738	89.5768	1.95326e-36	1.50166e-34
LOC114670990	0.272085	-1.37897	-1.65106	0.754354	89.5313	2.02987e-36	1.55754e-34
GRID2	0.599634	2.4887	1.88906	5.98537	89.4534	2.16782e-36	1.66019e-34
HHAT	-1.39782	-0.327182	1.07064	6.58486	89.3744	2.31738e-36	1.7679e-34
LOC107000097	1.28522	2.08524	0.800016	2.05924	89.1687	2.75736e-36	2.09951e-34
CABP1	-1.56838	-0.584347	0.984037	5.1603	89.1299	2.84942e-36	2.16545e-34
LACC1	1.38481	-0.584574	-1.96939	5.47946	87.8227	8.61232e-36	6.49526e-34
FLRT2	0.691359	2.47983	1.78847	5.44496	87.8052	8.74084e-36	6.57968e-34
LOC106998826	0.667025	2.62284	1.95582	3.03682	87.7621	9.06611e-36	6.8116e-34
KLHL35	1.58865	1.48454	-0.104112	1.20142	87.7119	9.45991e-36	7.09404e-34
TRPV2	-1.50477	0.23356	1.73833	1.55744	87.6902	9.63564e-36	7.21218e-34
LAMB1	1.65233	-0.0231995	-1.67553	4.54546	87.6687	9.81269e-36	7.33087e-34
SVOP	-1.78729	-0.419758	1.36753	4.50838	87.5119	1.12074e-35	8.35713e-34
C15H9orf153	2.03281	0.9098	-1.12301	3.06402	87.3297	1.30797e-35	9.73497e-34
VWA2	-1.26326	0.189803	1.45306	0.910218	87.0623	1.64082e-35	1.21894e-33
CBY3	0.0784465	2.08465	2.00621	3.41074	86.864	1.94155e-35	1.43965e-33
LOC106998672	0.391785	2.2725	1.88071	1.75623	86.7011	2.22928e-35	1.64992e-33
LOC106998779	0.209204	-1.1168	-1.32601	0.434034	86.6712	2.28675e-35	1.68314e-33
GABRA5	-1.58321	0.867733	2.45094	3.65914	86.6711	2.2869e-35	1.68314e-33
DGKB	-0.508785	1.59329	2.10208	6.67784	86.5812	2.46824e-35	1.81324e-33
MAMLD1	1.02287	-0.181509	-1.20438	7.32532	86.439	2.78493e-35	2.04211e-33
SH3GL3	0.825126	-1.23141	-2.05653	2.00443	86.0935	3.73476e-35	2.72349e-33
APOL5	0.525897	-1.5218	-2.04769	4.52088	86.0709	3.80718e-35	2.77121e-33
LOC106995771	0.757756	2.15899	1.40123	4.77871	85.78	4.87514e-35	3.53559e-33
LOC106997483	2.10399	1.38546	-0.718534	2.18003	85.4988	6.19221e-35	4.48257e-33
LOC114677516	1.60936	2.22288	0.613522	5.28138	85.3278	7.16174e-35	5.17498e-33
LOC694004	-1.69406	-1.65792	0.0361413	1.44185	85.3235	7.18794e-35	5.18447e-33
PAX3	0.247788	1.25158	1.00379	3.08081	85.2728	7.50477e-35	5.40316e-33
SLC7A11	1.9464	1.52038	-0.426023	1.63556	85.2429	7.69836e-35	5.5225e-33
LOC106996779	2.13934	1.06866	-1.07068	2.9127	85.2324	7.76738e-35	5.56195e-33
SHC4	-1.4512	0.0886777	1.53988	1.41593	85.0297	9.22993e-35	6.59732e-33
LOC114670573	1.61809	1.99476	0.376663	3.72247	84.8704	1.05704e-34	7.5419e-33
NOTCH2	0.581209	1.57268	0.991467	4.4827	84.5761	1.35828e-34	9.65646e-33
ADAMTSL4	0.0631345	-1.20963	-1.27276	0.493916	84.4278	1.54111e-34	1.09171e-32
ANKRD55	-1.23212	0.0786154	1.31074	2.0088	84.2707	1.76203e-34	1.24599e-32
LPAR1	-1.60889	-0.0181251	1.59077	2.60671	84.2367	1.81379e-34	1.2803e-32
LOC114677463	1.45827	1.78956	0.331289	1.51915	84.2198	1.84009e-34	1.29656e-32
GABRB1	-1.64443	-0.948514	0.695914	6.4821	84.0554	2.117e-34	1.4864e-32
ADAMTS2	1.80117	0.517275	-1.2839	2.84361	83.8096	2.61069e-34	1.82656e-32
TMTC1	0.714617	2.66525	1.95064	4.77157	83.8054	2.6202e-34	1.82999e-32
LOC114670778	0.993764	1.48192	0.488156	1.92463	83.79	2.65491e-34	1.85097e-32
ETV1	-1.77426	-0.203859	1.5704	1.99275	83.7489	2.74945e-34	1.91352e-32
ATP1B2	1.29872	-1.1114	-2.41012	2.6451	83.666	2.95106e-34	2.05024e-32
RGS6	1.14645	1.63776	0.49131	2.80882	83.4421	3.57252e-34	2.47333e-32
MAML2	-0.055696	2.37418	2.42988	3.3041	83.1436	4.60945e-34	3.18012e-32
RPS8	0.417109	-1.50304	-1.92015	3.2301	83.1131	4.73119e-34	3.25844e-32
LOC106993242	2.04701	0.238307	-1.8087	3.89576	83.1063	4.75891e-34	3.27186e-32
TESK2	1.48339	0.395247	-1.08814	3.78372	83.002	5.20245e-34	3.57061e-32
SLC9A1	1.37464	0.666165	-0.708478	6.26992	82.9211	5.57448e-34	3.81934e-32
NSMAF	-1.64716	-0.546111	1.10105	5.93236	82.916	5.59909e-34	3.82958e-32
EGFR	-2.37274	-0.67754	1.6952	3.15774	82.608	7.28497e-34	4.96554e-32
SLITRK5	-1.86826	-1.18454	0.683725	1.44121	82.5461	7.68077e-34	5.22635e-32
PREX2	-1.46074	-2.00099	-0.540251	5.3928	82.4795	8.13102e-34	5.52325e-32
ITGB5	0.0920486	-1.91296	-2.00501	1.79863	82.1682	1.06119e-33	7.19616e-32
COL4A4	-0.363585	-1.05211	-0.688525	7.54623	81.9624	1.26555e-33	8.55269e-32
WRB	0.794143	2.1421	1.34796	3.75388	81.6196	1.69714e-33	1.14499e-31
CACNA1I	1.23645	0.869401	-0.367049	1.36509	81.5748	1.76348e-33	1.18773e-31
STYK1	-0.0142203	-1.12724	-1.11302	0.892438	81.5265	1.83798e-33	1.23581e-31
LRP4	0.52514	-1.26226	-1.7874	1.36894	81.2817	2.2669e-33	1.52162e-31
LOC106997152	0.157545	-1.36516	-1.52271	0.627559	80.991	2.90837e-33	1.94561e-31
GRM7	-1.64806	-1.86871	-0.22065	6.80215	80.7336	3.62682e-33	2.42215e-31
KCNJ6	-1.76774	0.616452	2.38419	3.79942	80.5749	4.1557e-33	2.7568e-31
LOC712069	0.432999	-1.46447	-1.89747	5.48708	80.4975	4.44078e-33	2.941e-31
TAFA5	1.64635	0.989819	-0.656533	6.90176	80.3069	5.23014e-33	3.45607e-31
LOC114670311	1.34933	1.72514	0.375812	1.26585	80.3056	5.23594e-33	3.45607e-31
MCMDC2	0.433605	-1.73913	-2.17274	4.16849	80.2159	5.65504e-33	3.7265e-31
TRHDE	-0.0110829	2.08212	2.09321	4.53221	80.1808	5.82828e-33	3.83429e-31
LOC100428531	1.95746	0.859275	-1.09819	2.64015	80.1004	6.24482e-33	4.09474e-31
EFCAB5	0.214846	-2.00588	-2.22073	3.58929	80.0819	6.34441e-33	4.15318e-31
LOC114679482	0.040433	-1.77864	-1.81907	4.63523	79.7374	8.52963e-33	5.57447e-31
PNLDC1	-1.96338	-1.8774	0.0859778	2.26967	79.7345	8.55052e-33	5.57893e-31
SLC6A8	1.80692	1.4258	-0.381119	2.66234	79.5886	9.69321e-33	6.31411e-31
BRINP3	-2.28207	-0.85487	1.42721	4.65654	79.5332	1.01654e-32	6.60005e-31
LOC106998220	0.361743	2.23435	1.87261	4.23442	79.3026	1.23948e-32	8.03431e-31
BMT2	0.61216	-0.601365	-1.21352	6.4763	79.29	1.25299e-32	8.10867e-31
LOC114678987	-1.02225	-2.23876	-1.21651	2.56701	79.1771	1.38076e-32	8.92095e-31
NSUN7	-0.965903	-2.21631	-1.2504	2.72728	79.0586	1.52888e-32	9.86191e-31
FMNL1	0.0856625	1.79088	1.70522	1.73982	78.9338	1.7022e-32	1.09621e-30
PATL2	0.613416	-1.37013	-1.98354	1.99838	78.8473	1.8337e-32	1.17707e-30
APBA2	0.436819	1.16163	0.724807	7.34243	78.8415	1.84292e-32	1.18108e-30
LOC106995911	0.857579	1.25811	0.400532	0.866232	78.5452	2.37829e-32	1.52172e-30
GLCE	1.3827	2.20373	0.821032	4.76167	78.4308	2.62449e-32	1.67655e-30
ITGA6	-1.67022	0.219873	1.89009	2.00161	78.3694	2.76715e-32	1.76484e-30
RNF24	-1.24196	-0.705961	0.535995	6.41063	78.3518	2.80949e-32	1.7861e-30
LOC114670419	0.174104	2.03405	1.85995	4.83147	78.3307	2.86089e-32	1.81586e-30
EDIL3	2.1095	0.263482	-1.84602	6.39671	78.3183	2.89164e-32	1.83245e-30
ARHGAP26	-1.30007	-0.647491	0.652581	6.7653	78.0403	3.67436e-32	2.32105e-30
SIPA1L1	1.0068	0.459123	-0.547681	7.39622	77.8552	4.30967e-32	2.71804e-30
LOC114670838	-1.50306	0.600797	2.10385	3.42466	77.8266	4.41755e-32	2.78165e-30
MKRN3	1.90937	2.08894	0.179568	4.98908	77.7464	4.73349e-32	2.97587e-30
IZUMO1	1.09414	1.73575	0.641604	1.39591	77.6432	5.17441e-32	3.24792e-30
LOC714121	0.955405	1.32689	0.37148	1.59833	77.0951	8.30327e-32	5.20364e-30
COL4A2	1.75182	0.0529546	-1.69887	4.62549	76.8603	1.01687e-31	6.36268e-30
TRIM58	0.919567	2.12852	1.20895	1.54624	76.6821	1.18617e-31	7.4103e-30
MID1	1.50645	-0.223415	-1.72987	3.34142	76.4308	1.47386e-31	9.16425e-30
PRTG	-1.20434	0.411099	1.61544	1.75732	76.0647	2.02258e-31	1.24978e-29
SH3RF2	-1.60652	-0.441697	1.16482	1.53848	76.0452	2.05689e-31	1.269e-29
ADGRB1	1.26324	1.47213	0.208886	4.45645	75.7244	2.71493e-31	1.6672e-29
LOC107000709	1.234	1.98547	0.751467	4.60757	75.4956	3.30942e-31	2.01977e-29
QKI	-0.224522	2.19371	2.41823	3.60661	75.411	3.56096e-31	2.16329e-29
ENGASE	-1.33486	0.407418	1.74228	2.02151	75.2793	3.99127e-31	2.421e-29
LOC106993618	2.00663	0.836184	-1.17044	3.6664	75.1072	4.63282e-31	2.80586e-29
ZNF224	1.20522	-0.557262	-1.76248	5.49109	74.8389	5.84518e-31	3.53473e-29
LOC114678437	0.475364	2.26409	1.78872	1.87589	74.7383	6.37803e-31	3.85109e-29
ARHGAP23	1.21615	-0.287458	-1.50361	4.57436	74.565	7.412e-31	4.46182e-29
LOC106998702	-1.15304	1.82547	2.97851	4.31197	74.4562	8.1456e-31	4.896e-29
PRSS55	0.64679	-1.79808	-2.44487	3.85237	74.4463	8.21543e-31	4.9305e-29
IGDCC4	-0.720787	0.45574	1.17653	6.50054	74.3962	8.58073e-31	5.14196e-29
HHLA1	1.47109	1.10984	-0.361256	0.834595	74.3142	9.21325e-31	5.51266e-29
LOC710876	0.241775	-1.13694	-1.37871	5.97691	74.2911	9.39923e-31	5.61547e-29
ZBTB46	-1.06147	-2.08096	-1.01949	3.77403	74.2287	9.92277e-31	5.91934e-29
RPS6KA5	1.4528	0.239619	-1.21318	5.53668	74.1371	1.07432e-30	6.38956e-29
SLC8A2	0.200263	1.85221	1.65194	2.28525	73.8844	1.33784e-30	7.93306e-29
MAP3K14	1.01133	1.77532	0.76399	4.91489	73.8398	1.39062e-30	8.23374e-29
SLC25A1	0.930022	2.48414	1.55412	2.79512	73.7282	1.53222e-30	9.04509e-29
ZNRF2	-0.806308	0.47502	1.28133	6.82692	73.5449	1.79658e-30	1.05742e-28
CST3	1.35339	1.73803	0.384643	1.58155	73.535	1.81218e-30	1.06502e-28
HDAC5	-1.10138	0.386456	1.48783	5.28656	73.523	1.83105e-30	1.07452e-28
C15H9orf152	0.0208027	-1.66504	-1.68584	1.16389	73.373	2.08603e-30	1.22054e-28
C8H8orf89	1.69511	0.216231	-1.47888	2.4248	73.3405	2.14581e-30	1.25367e-28
LOC703977	0.727643	1.08821	0.360563	0.653983	73.3175	2.18909e-30	1.2752e-28
ACKR1	1.7401	0.962212	-0.777884	1.53065	73.2273	2.36755e-30	1.37714e-28
LOC107001043	1.20211	0.789091	-0.41302	0.653076	73.1959	2.43324e-30	1.41327e-28
LOC106998721	1.07708	1.06634	-0.0107359	0.549291	73.1099	2.62213e-30	1.51854e-28
SHD	1.37683	-0.316357	-1.69319	2.1422	73.057	2.7455e-30	1.58767e-28
SYT9	0.654518	2.47224	1.81772	3.69593	72.8738	3.21959e-30	1.85641e-28
NPTX2	-1.10837	0.872715	1.98108	4.27562	72.8523	3.2803e-30	1.88867e-28
POFUT2	1.99406	0.292396	-1.70166	5.67422	72.5202	4.37955e-30	2.50702e-28
SNTG2	0.460242	1.6037	1.14345	7.42189	72.4873	4.5067e-30	2.57609e-28
BBS4	1.70022	0.789295	-0.910922	4.96062	72.4827	4.52447e-30	2.58253e-28
PLXNC1	0.857954	-1.35949	-2.21744	2.65049	72.4435	4.68175e-30	2.66846e-28
SNCAIP	-2.03594	-1.53394	0.501999	4.10478	72.4325	4.72678e-30	2.69026e-28
TCIRG1	-1.67644	-1.13285	0.543589	5.48802	72.3915	4.89845e-30	2.77999e-28
LOC704510	0.607172	1.16931	0.562143	0.864395	72.2682	5.45377e-30	3.09073e-28
PPEF2	0.241764	1.00754	0.765774	7.11196	71.7687	8.42639e-30	4.76854e-28
MAP4K4	0.86619	-0.741538	-1.60773	5.60333	71.6685	9.1957e-30	5.19649e-28
PSMD5	1.00654	-0.297021	-1.30357	5.83007	71.6043	9.7248e-30	5.48767e-28
PAPSS2	-0.938633	-2.37196	-1.43332	2.59946	71.52	1.04666e-29	5.8895e-28
LOC715289	-1.45402	-1.25858	0.195438	3.9958	71.4653	1.09783e-29	6.16868e-28
SURF2	-0.905517	1.32065	2.22617	4.59263	71.323	1.24281e-29	6.97346e-28
LOC114679308	-0.204606	1.21622	1.42082	1.61641	71.0942	1.51737e-29	8.49e-28
MEGF11	0.955238	-0.767087	-1.72232	5.92399	70.9681	1.6939e-29	9.45106e-28
COX1	0.631392	1.20756	0.576169	1.03839	70.9611	1.70434e-29	9.49594e-28
GUCY2C	-0.520122	-1.88236	-1.36223	1.48635	70.8717	1.84267e-29	1.02523e-27
PDGFRA	0.924337	1.0102	0.0858652	0.822454	70.7828	1.99128e-29	1.10636e-27
CACNB3	1.84557	1.11581	-0.729755	3.27775	70.6257	2.28415e-29	1.26026e-27
SERPINI1	1.96733	1.406	-0.561322	4.38716	70.4272	2.71645e-29	1.49254e-27
LOC106996190	0.0171308	1.33739	1.32026	1.4526	70.3223	2.97709e-29	1.63349e-27
LOC106996520	-0.252515	1.96369	2.21621	3.47363	70.2956	3.04756e-29	1.66984e-27
LOC716824	0.514633	-1.6354	-2.15003	4.84161	70.1441	3.47899e-29	1.90361e-27
PINX1	1.49693	0.790869	-0.706059	6.02447	70.1038	3.60372e-29	1.96914e-27
RXFP2	1.88127	1.08061	-0.800669	5.32299	69.5402	5.89921e-29	3.21017e-27
RHOU	-0.140975	-1.99693	-1.85596	1.79353	69.5072	6.07199e-29	3.29967e-27
LOC114670308	-0.510545	1.07961	1.59016	1.26325	69.4333	6.47776e-29	3.51536e-27
THSD7A	-1.52197	0.126644	1.64861	5.61282	69.3352	7.05833e-29	3.82519e-27
CISD1	1.28613	-0.0670328	-1.35316	5.5754	69.0889	8.75749e-29	4.73956e-27
FER1L5	1.05084	-0.394839	-1.44568	5.74136	69.0283	9.23451e-29	4.99092e-27
LOC114669928	-1.47064	0.333562	1.8042	2.90006	68.9931	9.52372e-29	5.14022e-27
MTG1	-0.837825	1.14095	1.97878	5.23225	68.8912	1.04126e-28	5.61234e-27
MAP4K1	-0.00323592	1.97524	1.97848	2.57527	68.7931	1.1347e-28	6.09112e-27
TMPRSS6	-1.47139	0.354891	1.82628	1.91275	68.6532	1.28275e-28	6.87658e-27
LOC114677645	-1.02488	0.412501	1.43738	1.04097	68.5812	1.36627e-28	7.31442e-27
LOC718978	-0.116836	1.77818	1.89502	2.05866	68.5446	1.41083e-28	7.54282e-27
NOS3	0.167406	1.78197	1.61456	2.17856	68.2876	1.76736e-28	9.43623e-27
LOC114672701	-0.941928	0.313482	1.25541	4.23472	68.1207	2.04593e-28	1.09089e-26
LOC114676415	1.65909	0.912887	-0.746199	1.417	68.047	2.18266e-28	1.16223e-26
GPR85	1.9189	0.861173	-1.05773	2.51211	67.9635	2.34851e-28	1.24887e-26
LOC106997664	1.57404	0.286649	-1.28739	5.3207	67.7636	2.79889e-28	1.48043e-26
LOC114673073	1.49886	-0.340323	-1.83918	1.81156	67.7407	2.8558e-28	1.50852e-26
TMEM87A	0.314232	-0.901766	-1.216	6.95655	67.632	3.14161e-28	1.65728e-26
CCDC47	1.59167	1.1016	-0.49007	4.30683	67.5637	3.33586e-28	1.75742e-26
LOC698273	1.01569	0.158748	-0.856939	0.596318	67.5513	3.37253e-28	1.77438e-26
KCNK10	-1.70408	-0.476478	1.2276	2.19793	67.5037	3.51629e-28	1.84757e-26
CDC14B	-1.54948	-0.11581	1.43367	3.30769	67.4393	3.72108e-28	1.95258e-26
LOC100427418	-1.12892	0.01304	1.14196	0.682953	67.4196	3.78599e-28	1.98402e-26
LOC698935	0.707411	1.73246	1.02505	2.74258	67.4102	3.81719e-28	1.99773e-26
SPRED3	-1.1967	0.0936657	1.29037	0.880204	67.3801	3.91944e-28	2.04854e-26
MGLL	-1.46571	-0.295023	1.17069	1.51894	67.3124	4.15962e-28	2.17121e-26
SVEP1	0.13463	-1.99385	-2.12848	3.12102	67.2695	4.31945e-28	2.24872e-26
LOC106994245	2.00068	0.230608	-1.77007	3.09694	67.2506	4.39167e-28	2.28332e-26
LOC106998041	1.32136	2.15314	0.831779	1.97564	67.1011	5.00831e-28	2.59712e-26
TLE1	-0.579392	1.40234	1.98173	2.71312	66.927	5.83665e-28	3.02272e-26
ETV5	-1.40562	-0.176826	1.22879	1.30297	66.8374	6.31479e-28	3.26182e-26
TACR1	1.39037	1.28982	-0.100552	1.03718	66.7454	6.8472e-28	3.53223e-26
RNF175	2.05599	1.33925	-0.716745	4.5618	66.7383	6.8902e-28	3.5498e-26
SERINC2	1.23815	1.8493	0.611147	1.69085	66.6824	7.23699e-28	3.72362e-26
LRRTM2	1.66382	0.574025	-1.0898	1.38359	66.5813	7.90987e-28	4.06457e-26
DIRAS2	1.77811	1.37051	-0.407596	3.4488	66.4253	9.07392e-28	4.65669e-26
ZNF862	1.08098	-0.607476	-1.68846	5.44063	66.0702	1.24027e-27	6.34041e-26
BNC2	0.189243	-1.33379	-1.52304	2.54366	65.9967	1.32321e-27	6.75568e-26
LRRTM4	-2.20007	-2.18987	0.0101983	5.06098	65.9243	1.41041e-27	7.18241e-26
LOC114670983	1.53862	0.300708	-1.23791	2.06155	65.8842	1.46107e-27	7.43087e-26
CDKN1A	1.33328	1.04819	-0.285081	0.949513	65.7674	1.61939e-27	8.21501e-26
CCNJL	1.53388	-0.148421	-1.6823	3.20426	65.6677	1.76802e-27	8.95754e-26
PCOLCE2	1.63347	1.03394	-0.599527	1.8487	65.6092	1.86157e-27	9.41944e-26
ATXN7L1	1.265	0.790132	-0.47487	6.27672	65.4966	2.05583e-27	1.03759e-25
FAM180A	1.0909	0.76587	-0.32503	0.683956	65.4429	2.15541e-27	1.08509e-25
PRIMPOL	-0.281997	-1.8405	-1.55851	4.82385	65.4038	2.23108e-27	1.12035e-25
ADAM7	-1.22095	1.27431	2.49526	4.42219	65.4038	2.2311e-27	1.12035e-25
DNAH6	0.294354	1.84121	1.54685	5.51081	65.3779	2.28268e-27	1.1448e-25
LOC106993164	1.54302	1.55056	0.00753785	1.90089	65.2651	2.52117e-27	1.26281e-25
AIRE	-1.22135	-0.359753	0.861598	0.785571	65.2575	2.53825e-27	1.26977e-25
LOC114674865	-0.0423348	-1.08743	-1.04509	0.520192	65.2442	2.56808e-27	1.28307e-25
HRH3	1.42234	1.40547	-0.0168762	2.88918	65.1915	2.69026e-27	1.34242e-25
LOC107000234	1.69352	0.852823	-0.840702	1.91164	65.1746	2.73073e-27	1.36091e-25
SLITRK6	1.75512	2.06878	0.31366	2.87241	65.0624	3.01492e-27	1.49877e-25
LOC114670538	0.85992	1.3825	0.522579	0.877418	64.9974	3.19266e-27	1.58514e-25
LOC106993921	-1.02361	1.40391	2.42752	3.24651	64.8446	3.65345e-27	1.81165e-25
SPPL2B	1.50917	1.36209	-0.147085	3.55708	64.7364	4.01956e-27	1.99071e-25
LOC106997909	1.43205	0.459702	-0.972344	1.4831	64.6992	4.15393e-27	2.05213e-25
LOC106994767	-1.30269	-0.755472	0.547215	0.981063	64.6739	4.2474e-27	2.0957e-25
ANKRD23	1.01738	-1.13368	-2.15106	2.08084	64.5461	4.75484e-27	2.33735e-25
MLXIP	1.10494	0.210728	-0.894215	5.95171	64.5333	4.80874e-27	2.36092e-25
SCN7A	-0.175631	-1.60999	-1.43436	1.35844	64.4004	5.40755e-27	2.64836e-25
C1H1orf74	1.33932	-0.677286	-2.01661	4.05649	64.3643	5.58311e-27	2.73097e-25
SMC1B	0.396504	-1.04576	-1.44226	1.54137	64.2675	6.0812e-27	2.97095e-25
LOC106999673	0.838777	1.21576	0.37698	5.66177	64.2555	6.14604e-27	2.99893e-25
ZNF655	1.22678	-0.470376	-1.69716	4.44707	64.0952	7.08093e-27	3.44937e-25
STARD4	1.59461	-0.237085	-1.8317	2.6756	64.0587	7.3132e-27	3.55532e-25
LOC114670816	1.87877	1.40981	-0.468964	3.06129	63.9223	8.25041e-27	4.00604e-25
RHBDL3	-1.19492	-1.18597	0.00894867	6.2294	63.8384	8.88501e-27	4.3089e-25
LOC721629	0.650205	-0.954289	-1.60449	6.29285	63.737	9.71863e-27	4.70168e-25
LOC106999016	-0.952747	0.460702	1.41345	1.34817	63.6771	1.02472e-26	4.95135e-25
LOC106994373	1.62685	2.08948	0.462624	3.16065	63.6008	1.09632e-26	5.28446e-25
TRAF1	0.176891	-0.950671	-1.12756	0.444925	63.5688	1.1277e-26	5.4291e-25
LOC106997042	0.406604	-1.39114	-1.79774	2.32959	63.5034	1.19489e-26	5.74563e-25
IQCA1	0.268663	-1.81988	-2.08855	5.85594	63.3218	1.40317e-26	6.73895e-25
IPCEF1	0.00673541	1.47542	1.46868	2.71709	63.3125	1.41482e-26	6.78668e-25
LOC106998184	0.0122256	-1.12109	-1.13332	0.582826	63.0977	1.71099e-26	8.18758e-25
MAMDC2	0.560552	2.28567	1.72512	3.44842	63.0079	1.85265e-26	8.83347e-25
LOC106997883	1.14234	0.638013	-0.504325	0.755471	62.9171	2.00761e-26	9.5494e-25
CYorf15A	-0.253836	-1.1023	-0.848463	1.12077	62.8522	2.12649e-26	1.01027e-24
ATP10D	0.0809181	1.41509	1.33417	6.1776	62.7753	2.27635e-26	1.07889e-24
SNRPA1	-1.56825	-0.556492	1.01176	4.85637	62.7428	2.34277e-26	1.10904e-24
CCDC36	1.20642	1.01427	-0.192153	2.50194	62.3752	3.24477e-26	1.52874e-24
LOC723069	-0.216297	1.20735	1.42364	5.54585	62.3122	3.4312e-26	1.61274e-24
PAMR1	-1.81007	-2.29768	-0.487607	3.21557	62.1397	3.99847e-26	1.87715e-24
CD226	1.87073	0.697047	-1.17369	3.03968	61.9963	4.54071e-26	2.1292e-24
SYNDIG1	1.40052	2.046	0.645483	5.33998	61.8608	5.12056e-26	2.39261e-24
KLKB1	0.448687	2.32732	1.87863	3.52989	61.7791	5.50554e-26	2.56947e-24
GLIPR1L1	1.4661	1.9354	0.469298	2.24639	61.6764	6.03072e-26	2.80797e-24
IGFL1	-0.628694	-2.08475	-1.45606	1.94664	61.5733	6.60869e-26	3.07347e-24
LOC106992403	-1.66714	-1.24292	0.424215	2.90347	61.4496	7.37611e-26	3.42635e-24
STPG4	1.84716	0.705665	-1.1415	4.07308	61.4101	7.63933e-26	3.54447e-24
RGS22	0.502208	1.34144	0.839234	6.80924	61.3825	7.82872e-26	3.6281e-24
FBLN7	-0.953704	-2.06495	-1.11125	2.29175	61.3485	8.06885e-26	3.73502e-24
HPN	1.43439	-0.258187	-1.69258	2.82786	61.3309	8.19569e-26	3.78931e-24
GRIP2	-0.559428	0.624206	1.18363	6.92325	61.0795	1.02471e-25	4.73229e-24
BTNL9	0.655532	1.7131	1.05757	1.29542	61.036	1.06503e-25	4.90704e-24
BRINP2	-0.855985	0.72694	1.58292	6.21829	60.9929	1.10665e-25	5.09288e-24
CACNA1G	1.02408	0.0775045	-0.946577	5.97033	60.9424	1.15746e-25	5.32057e-24
UNC119	1.63521	1.70038	0.0651664	2.62929	60.9222	1.17843e-25	5.41067e-24
CDH4	1.21964	-0.235656	-1.4553	2.07483	60.8919	1.21059e-25	5.55192e-24
LOC114679467	1.03099	-0.0854712	-1.11646	0.728755	60.8208	1.28957e-25	5.90731e-24
LOC114679364	0.145144	-1.11801	-1.26315	0.784064	60.7992	1.31459e-25	6.01498e-24
ROBO3	-0.555226	1.4215	1.97673	1.61127	60.6	1.56931e-25	7.17219e-24
LOC714206	0.156376	2.11368	1.9573	3.38246	60.5887	1.58514e-25	7.23618e-24
RUNX1T1	0.925725	-0.156669	-1.08239	6.84604	60.5741	1.60582e-25	7.32218e-24
TARS	0.702569	1.48632	0.78375	5.17657	60.4463	1.7992e-25	8.1851e-24
SEPTIN11	-0.349958	1.67094	2.0209	2.09583	60.4373	1.81356e-25	8.24102e-24
SH3KBP1	-0.0992116	0.963737	1.06295	7.32558	60.4205	1.84094e-25	8.35583e-24
FAM49A	-1.12056	-0.393817	0.726743	6.92013	60.3915	1.88903e-25	8.56434e-24
LOC106997381	0.919982	1.36943	0.449443	2.18706	60.3559	1.94975e-25	8.82952e-24
LOC114679325	0.147915	1.55128	1.40337	2.18637	60.3436	1.97128e-25	8.91682e-24
NPTX1	-0.683473	0.991793	1.67527	1.13866	60.2941	2.05992e-25	9.30719e-24
MMP16	-0.574503	0.460973	1.03548	7.39375	60.2301	2.18069e-25	9.84162e-24
LOC114673711	0.652095	-0.870847	-1.52294	1.34924	60.1361	2.37094e-25	1.0676e-23
LOC106993946	-0.740161	1.27356	2.01372	1.89924	60.0859	2.47929e-25	1.1126e-23
NMNAT1	0.0684013	1.49177	1.42337	4.20495	60.0703	2.51408e-25	1.12693e-23
CCDC141	-0.70925	0.46006	1.16931	7.81554	59.9185	2.87771e-25	1.28847e-23
FAM207A	-1.47297	-0.540549	0.932418	3.30848	59.854	3.048e-25	1.36165e-23
LOC114679047	0.556107	-0.854478	-1.41058	0.699637	59.7355	3.38715e-25	1.50806e-23
LOC100429669	0.696631	2.1896	1.49297	2.98396	59.6515	3.65025e-25	1.62338e-23
SLX4IP	1.25665	2.00621	0.749563	3.59917	59.5861	3.86931e-25	1.71887e-23
SNED1	0.650857	1.30693	0.656075	6.54336	59.58	3.89034e-25	1.72628e-23
ZBTB38	1.17743	0.122976	-1.05445	6.58986	59.5609	3.95721e-25	1.75303e-23
KCNMB2	0.923337	1.22061	0.297276	1.17476	59.5602	3.95946e-25	1.75303e-23
BTN3A3	1.53128	1.08807	-0.443215	1.35183	59.5275	4.07665e-25	1.8029e-23
LOC114670794	1.0259	0.446693	-0.579205	1.12503	59.3213	4.89929e-25	2.16431e-23
ATF7IP	1.17003	0.762649	-0.407377	6.63028	59.2953	5.01388e-25	2.21247e-23
LOC106992391	-0.945259	0.996581	1.94184	3.31452	59.2399	5.26782e-25	2.32194e-23
TOX	-0.272141	-1.62574	-1.3536	1.37293	59.1711	5.60084e-25	2.46599e-23
GRM4	0.668254	1.30499	0.636738	7.16373	59.1431	5.74284e-25	2.5257e-23
LOC106995188	1.42682	0.941055	-0.485769	1.24895	59.1234	5.8444e-25	2.56752e-23
LOC106996755	1.55944	2.07557	0.516132	3.85726	59.1131	5.89817e-25	2.58828e-23
ATP8B2	0.52488	-0.708073	-1.23295	6.07315	59.1111	5.90903e-25	2.59018e-23
C18H18orf63	0.81657	1.17028	0.35371	0.752469	58.995	6.55366e-25	2.86641e-23
UBE2B	0.857804	-0.203148	-1.06095	5.99028	58.9647	6.73295e-25	2.94159e-23
FREM1	1.79063	1.28342	-0.507209	2.46775	58.9253	6.97367e-25	3.04006e-23
LOC114680185	1.3794	0.926334	-0.453069	1.8605	58.9138	7.04548e-25	3.06799e-23
RPS6KA4	-0.343699	1.05653	1.40023	4.05479	58.8169	7.68163e-25	3.34134e-23
INTS6L	0.474522	-1.42007	-1.89459	5.49476	58.8092	7.7346e-25	3.3607e-23
MAML3	-0.897659	0.289645	1.1873	7.31396	58.6223	9.13845e-25	3.96633e-23
LPIN2	-0.1288	1.50296	1.63176	5.40362	58.5854	9.44423e-25	4.09456e-23
LOC107000524	0.0607205	1.59049	1.52977	2.03002	58.5678	9.5938e-25	4.15487e-23
CENPL	-0.581972	-1.94472	-1.36275	1.73037	58.4364	1.07887e-24	4.66725e-23
FBN1	-1.40195	-1.72391	-0.321952	4.95261	58.1719	1.36631e-24	5.89149e-23
LOC114680150	-0.82856	0.231339	1.0599	6.21319	58.0703	1.49601e-24	6.44374e-23
LHFPL6	-1.96919	-1.47707	0.492116	4.41682	58.0554	1.51616e-24	6.51637e-23
CYBRD1	0.0517214	-1.01007	-1.06179	0.720793	57.9637	1.64559e-24	7.06499e-23
MYCBP	1.18807	1.20937	0.0212943	1.01364	57.9225	1.70724e-24	7.32175e-23
LOC106998323	0.615988	1.63158	1.01559	1.08984	57.8845	1.76622e-24	7.55019e-23
LOC106993483	1.42144	1.03962	-0.381811	1.36745	57.8779	1.77667e-24	7.58672e-23
SNCB	1.01191	1.23557	0.223662	4.53218	57.8674	1.7934e-24	7.6499e-23
FAM20C	-0.319156	1.42014	1.73929	4.99472	57.8306	1.85339e-24	7.8973e-23
LOC106995930	0.950734	1.23504	0.284307	0.816673	57.8223	1.86722e-24	7.94769e-23
PXDN	1.44886	1.4122	-0.0366582	1.50214	57.8014	1.90237e-24	8.08863e-23
LOC696192	0.604636	-0.863698	-1.46833	1.91132	57.7218	2.04279e-24	8.67639e-23
LOC114678473	1.1606	0.0887496	-1.07185	2.19139	57.6772	2.1259e-24	9.01973e-23
LOC100426640	1.90904	0.926711	-0.982333	4.36993	57.6155	2.2464e-24	9.52079e-23
LOC114677016	1.21143	2.00238	0.790941	2.47901	57.6084	2.26072e-24	9.57127e-23
IGF2BP2	-0.777318	-1.65347	-0.876156	5.25513	57.5979	2.2821e-24	9.65149e-23
ACE	1.14259	1.09487	-0.0477154	0.923652	57.5764	2.32637e-24	9.82825e-23
EPHA8	1.27049	0.407528	-0.862964	1.26841	57.4676	2.56409e-24	1.0821e-22
LOC100429518	1.37025	1.17448	-0.195768	1.26771	57.4222	2.67023e-24	1.1257e-22
VAMP1	1.53482	1.02582	-0.509	4.43719	57.412	2.69484e-24	1.13486e-22
ANKRD9	-0.450819	1.34194	1.79276	2.57083	57.3904	2.74737e-24	1.15576e-22
LOC114672410	0.439461	1.26652	0.827062	4.41164	57.0263	3.80548e-24	1.59412e-22
CCDC38	1.27348	-0.604184	-1.87766	2.31061	56.9914	3.92628e-24	1.64299e-22
ZSCAN26	0.443749	-1.67706	-2.12081	2.47824	56.913	4.21158e-24	1.75867e-22
SLC2A11	1.13469	1.84987	0.715177	4.32588	56.8814	4.33281e-24	1.80739e-22
ZSCAN5A	1.83311	0.636574	-1.19654	2.3411	56.8426	4.48568e-24	1.86919e-22
GPR137C	-0.273767	-1.70667	-1.4329	6.34625	56.84	4.49609e-24	1.87156e-22
ZNF146	1.0017	-0.302716	-1.30442	4.91603	56.8242	4.56025e-24	1.89628e-22
KANK1	-0.907578	0.632818	1.5404	2.30232	56.8048	4.64037e-24	1.92758e-22
TET1	1.0692	-0.0597079	-1.12891	4.91773	56.7411	4.91262e-24	2.03231e-22
LGR5	-0.867668	1.1242	1.99187	2.22387	56.6017	5.56613e-24	2.30009e-22
SV2C	0.949958	1.3808	0.430837	1.89336	56.5674	5.73959e-24	2.36683e-22
LOC114669798	0.64853	1.22156	0.573032	0.759408	56.5218	5.97877e-24	2.46291e-22
PDE3B	0.433727	1.11051	0.676786	7.52681	56.4069	6.62739e-24	2.72727e-22
FAM81A	-1.66455	-0.511134	1.15342	3.05884	56.1992	7.98345e-24	3.26835e-22
CCDC88B	-0.108959	1.27181	1.38077	6.0516	56.1772	8.14216e-24	3.32646e-22
ZNF704	0.841068	-0.690202	-1.53127	6.06914	56.1143	8.6152e-24	3.50888e-22
EIF1AY	0.0110992	-1.07726	-1.08836	0.562698	56.0584	9.05794e-24	3.68165e-22
LOC114676445	1.23119	1.9751	0.743909	1.69872	56.0503	9.12383e-24	3.70463e-22
TLE5	0.606385	1.13351	0.527121	5.44489	56.0304	9.28769e-24	3.76731e-22
PHLDB2	-1.5362	-0.252754	1.28344	5.36904	55.9627	9.86972e-24	3.9993e-22
LOC114670764	1.21066	1.21238	0.00171767	1.2471	55.9523	9.96217e-24	4.03264e-22
RASSF4	1.41748	0.730115	-0.687364	5.69075	55.8663	1.07609e-23	4.35154e-22
PROK2	1.25684	1.98223	0.725386	3.07371	55.8646	1.07771e-23	4.35364e-22
ADAM28	0.298283	2.42018	2.1219	5.20262	55.8122	1.12963e-23	4.55874e-22
LOC114672706	-1.19474	0.417657	1.6124	3.24273	55.6363	1.32276e-23	5.3327e-22
LOC114677018	-1.29757	0.10694	1.40451	5.04598	55.5186	1.47003e-23	5.9204e-22
AK5	-0.949304	0.151972	1.10128	6.90431	55.4913	1.50652e-23	6.06124e-22
LOC106996457	-0.0899958	-1.11259	-1.0226	3.56301	55.3054	1.78027e-23	7.14811e-22
CREB5	-1.4509	-1.8132	-0.362308	5.51872	55.1408	2.0638e-23	8.26981e-22
RHOJ	1.31728	1.14854	-0.168739	1.532	55.1333	2.07786e-23	8.31773e-22
ANKMY2	1.47218	0.0593426	-1.41284	4.26583	55.0306	2.27849e-23	9.11165e-22
ZSCAN25	1.55148	0.281432	-1.27004	2.6958	55.0169	2.30684e-23	9.21575e-22
LOC114679971	-0.818774	0.389517	1.20829	2.52345	54.8664	2.64079e-23	1.05181e-21
LOC106994750	1.10234	1.46851	0.366171	1.97729	54.7969	2.81102e-23	1.11625e-21
FGD4	0.280905	1.48436	1.20346	5.71762	54.7421	2.95288e-23	1.17024e-21
SERGEF	-0.208588	-1.04805	-0.839459	7.38386	54.5907	3.3837e-23	1.3383e-21
LOC106992963	0.989052	-0.667219	-1.65627	6.45255	54.4826	3.72902e-23	1.47194e-21
CORIN	-0.500824	1.58153	2.08236	3.37765	54.3634	4.15104e-23	1.6369e-21
USP12	1.18555	0.961601	-0.223948	5.52972	54.3514	4.19611e-23	1.65303e-21
NCAN	-1.23381	-0.038067	1.19575	3.69416	54.3252	4.296e-23	1.6907e-21
PDE6C	1.65276	1.08752	-0.565249	2.64176	54.3223	4.30722e-23	1.69343e-21
INTS8	0.697223	-0.788232	-1.48545	5.276	54.2495	4.59873e-23	1.80625e-21
GLRA3	1.18203	2.27665	1.09462	3.09262	54.2198	4.72354e-23	1.85344e-21
ITGB4	0.998456	-0.43182	-1.43028	1.75688	54.0391	5.55776e-23	2.17862e-21
ANKRD30BL	0.244348	-1.24021	-1.48456	1.145	54.0224	5.64187e-23	2.20941e-21
LOC106999263	-0.016348	-1.38129	-1.36494	2.43508	54.0071	5.71985e-23	2.23553e-21
LOC106998769	1.48123	1.1083	-0.372932	1.25706	53.9812	5.85468e-23	2.28598e-21
OVOL1	1.17541	1.3315	0.15609	1.29758	53.9737	5.89457e-23	2.29929e-21
LAMC2	0.773547	1.37043	0.596882	1.25582	53.9471	6.03741e-23	2.35269e-21
LOC114670401	0.0446565	1.18712	1.14247	1.27371	53.9002	6.29775e-23	2.45173e-21
ATP11C	-0.812632	0.21642	1.02905	1.36875	53.8065	6.85183e-23	2.66482e-21
L1CAM	1.32179	0.995924	-0.325866	4.24069	53.8006	6.8885e-23	2.67646e-21
EFR3B	-1.16251	-0.850641	0.311871	5.7935	53.7613	7.13708e-23	2.77033e-21
LOC700088	1.23835	1.64615	0.4078	1.82718	53.7257	7.36907e-23	2.85758e-21
OSBP2	-1.01207	-0.35282	0.659246	5.87819	53.6191	8.11217e-23	3.13961e-21
DGKG	0.0959155	-1.10141	-1.19732	3.17055	53.2996	1.08182e-22	4.17468e-21
C11H12orf73	1.63539	0.44328	-1.19211	2.69318	53.2801	1.10098e-22	4.24449e-21
LCP1	-1.25312	0.173214	1.42633	5.33665	53.2558	1.12534e-22	4.3342e-21
LOC100429866	0.656097	-0.395121	-1.05122	6.68554	53.2167	1.16575e-22	4.48548e-21
AJM1	0.745341	1.15307	0.407725	1.18276	53.1118	1.28133e-22	4.91114e-21
CMYA5	-1.67729	-1.37821	0.299084	2.60294	53.0933	1.30291e-22	4.98904e-21
LOC106992721	0.693917	-1.11581	-1.80972	1.71008	53.0732	1.32674e-22	5.0754e-21
LOC100425528	0.425722	-1.01002	-1.43574	1.98733	53.0416	1.36507e-22	5.21701e-21
LOC106998087	-1.65974	-1.42934	0.230397	5.66927	53.0227	1.38856e-22	5.30166e-21
LOC114679492	1.07622	0.867129	-0.209089	1.26252	53.0121	1.40195e-22	5.34763e-21
AOX1	0.882075	-1.10166	-1.98373	2.03677	53.0013	1.41564e-22	5.39466e-21
LOC114678244	1.25599	1.41229	0.156304	1.4105	52.9796	1.44361e-22	5.49597e-21
LOC706126	0.643533	-1.05167	-1.6952	3.91524	52.9457	1.48838e-22	5.66099e-21
PTPRF	1.39124	1.51541	0.124167	2.46692	52.8764	1.58438e-22	6.01457e-21
LOC106994480	0.428512	-1.16208	-1.59059	1.10491	52.8452	1.62958e-22	6.17436e-21
CTNNA3	-0.172476	1.14592	1.3184	4.7105	52.8374	1.64115e-22	6.21227e-21
PTPN13	-1.07021	0.124447	1.19466	6.36242	52.8065	1.68756e-22	6.38185e-21
LOC106995620	0.611451	1.37317	0.761716	3.51326	52.798	1.70051e-22	6.42469e-21
LOC694076	-0.97413	0.544188	1.51832	1.2607	52.7518	1.77286e-22	6.69168e-21
SHOC2	1.34414	0.662899	-0.681244	5.64921	52.7484	1.77835e-22	6.69966e-21
MCUB	1.23942	1.34456	0.105139	2.63284	52.7484	1.77836e-22	6.69966e-21
ABCC4	0.168558	1.55851	1.38995	3.25722	52.679	1.89329e-22	7.11912e-21
NME9	1.20527	0.776304	-0.428969	1.10548	52.6516	1.94061e-22	7.29016e-21
C14H11orf80	0.150902	-1.03051	-1.18141	5.6784	52.6317	1.97573e-22	7.41505e-21
SORCS2	0.521399	1.2335	0.712099	7.62409	52.626	1.98606e-22	7.44679e-21
MLLT11	1.67263	0.493559	-1.17907	4.11615	52.558	2.11178e-22	7.90324e-21
EIF1AX	1.38335	1.66835	0.285004	2.47717	52.5522	2.12276e-22	7.93684e-21
SLC2A5	0.189507	-1.11023	-1.29973	1.73864	52.3681	2.5065e-22	9.35397e-21
COLCA2	1.61436	1.4955	-0.118864	2.18665	52.3572	2.53137e-22	9.43792e-21
CDH24	0.269145	-0.789686	-1.05883	0.5761	52.3509	2.54578e-22	9.47619e-21
LOC106999773	1.03268	1.01114	-0.0215407	0.815248	52.3272	2.60095e-22	9.67008e-21
LOC106997719	0.962272	1.84458	0.882312	1.82624	52.3257	2.60451e-22	9.67423e-21
DFFB	0.859243	-0.77828	-1.63752	3.3742	52.2997	2.66632e-22	9.89456e-21
CXXC4	1.75597	0.937407	-0.818563	3.12692	52.1664	3.00736e-22	1.11497e-20
LOC106994778	0.575869	1.20722	0.631346	6.68539	52.1153	3.14943e-22	1.16547e-20
ANKRD24	-1.11101	-0.651384	0.459629	5.91263	52.106	3.17584e-22	1.17414e-20
PITPNM2	-0.351998	1.35227	1.70426	5.01348	52.0283	3.40693e-22	1.25841e-20
KIAA0895	1.2496	-0.227737	-1.47734	4.51909	51.9599	3.6241e-22	1.33738e-20
GABARAPL1	1.24581	1.11532	-0.130496	5.06646	51.9183	3.76291e-22	1.38731e-20
LOC106998830	1.47972	-0.0839467	-1.56366	2.30738	51.9147	3.77509e-22	1.39051e-20
TTC23L	1.12351	2.11309	0.989576	3.54307	51.8857	3.87544e-22	1.42615e-20
LOC114678358	0.602347	-0.975148	-1.5775	1.17988	51.8607	3.96403e-22	1.45605e-20
ENO1	-0.0984002	1.15248	1.25088	6.25709	51.8389	4.04275e-22	1.48222e-20
NRG4	-0.581363	-1.42798	-0.84662	6.28008	51.8235	4.09931e-22	1.50157e-20
ACCSL	0.402663	-0.639433	-1.0421	0.482625	51.775	4.28331e-22	1.56752e-20
PANK3	1.05296	0.257718	-0.795243	5.56769	51.7471	4.39271e-22	1.60459e-20
FAM181B	-0.59501	0.627779	1.22279	0.749878	51.7154	4.52025e-22	1.64966e-20
FGF9	1.23324	1.26808	0.0348423	5.64275	51.6426	4.82767e-22	1.76024e-20
MYRFL	0.277167	1.95554	1.67838	2.58992	51.6243	4.90817e-22	1.78795e-20
KLHL29	0.614131	1.29203	0.677897	7.25481	51.5817	5.10096e-22	1.85647e-20
LOC710951	0.0523789	-1.03649	-1.08887	2.68478	51.4955	5.51467e-22	2.00336e-20
KDM6A	0.620858	1.02521	0.404355	6.33541	51.4848	5.56835e-22	2.02101e-20
LOC106999251	1.49983	0.550243	-0.949587	5.59742	51.4336	5.83228e-22	2.11487e-20
LOC106997391	0.499773	1.1572	0.657432	0.731827	51.2801	6.70052e-22	2.41918e-20
KRBA1	1.43798	-0.00250014	-1.44048	2.30819	51.2753	6.72989e-22	2.42704e-20
ELMOD2	1.67092	1.02293	-0.647997	3.95394	51.0993	7.8919e-22	2.84094e-20
TPM3	0.0358031	1.34068	1.30488	5.29087	51.072	8.08922e-22	2.90933e-20
LOC106996242	1.22213	0.0568377	-1.16529	2.23428	51.0571	8.19903e-22	2.94615e-20
SCAMP5	0.267987	-0.942685	-1.21067	5.92911	51.0371	8.34905e-22	2.99735e-20
TXNDC16	0.394771	-1.10184	-1.49661	5.06162	50.9835	8.76412e-22	3.14067e-20
RNF128	-0.736908	0.824639	1.56155	1.28259	50.9697	8.87355e-22	3.17702e-20
ANKDD1B	1.62982	0.158436	-1.47139	4.05466	50.9581	8.9678e-22	3.20787e-20
LOC100429063	-1.2027	0.174697	1.3774	1.32558	50.9471	9.05744e-22	3.23701e-20
LOC114672397	-1.63936	-0.575096	1.06426	2.11874	50.8678	9.73181e-22	3.47489e-20
ALDH18A1	0.142583	-1.61158	-1.75416	3.85869	50.8034	1.03153e-21	3.67994e-20
LOC710188	1.5135	1.03314	-0.480363	5.9458	50.7921	1.04216e-21	3.7145e-20
ZNF660	0.384008	-1.65529	-2.0393	4.20883	50.723	1.10948e-21	3.94582e-20
LOC106993392	0.17175	-0.977634	-1.14938	0.521612	50.7224	1.11004e-21	3.94582e-20
IGSF8	-0.430513	-1.42189	-0.991382	0.888502	50.7158	1.11675e-21	3.9661e-20
EGLN3	1.6085	0.711938	-0.896565	2.02753	50.6131	1.22561e-21	4.34883e-20
SPTLC3	1.89314	0.160459	-1.73268	3.70118	50.5769	1.26648e-21	4.48985e-20
LOC719477	0.287521	1.31338	1.02586	2.30376	50.4862	1.37493e-21	4.86128e-20
CPT1B	1.21619	1.75191	0.535714	2.58171	50.4862	1.37493e-21	4.86128e-20
LOC114672238	-0.13859	-1.50551	-1.36692	1.75363	50.4515	1.41878e-21	5.00292e-20
TMEM266	-1.46178	-1.3948	0.0669868	3.99379	50.4074	1.47672e-21	5.20262e-20
GSTA4	1.13006	0.186746	-0.943318	6.51649	50.3952	1.49306e-21	5.25553e-20
RPL12	0.112586	1.28827	1.17568	4.22748	50.3619	1.53877e-21	5.4116e-20
KIAA1328	0.424584	-0.678688	-1.10327	7.59957	50.3538	1.55014e-21	5.44678e-20
KIF19	0.537509	-0.596647	-1.13416	0.809324	50.3496	1.55608e-21	5.45797e-20
WDR66	1.38031	0.705433	-0.674874	3.82889	50.3266	1.58883e-21	5.56793e-20
PNMA2	1.47345	1.13581	-0.337634	4.26238	50.2788	1.65922e-21	5.80433e-20
RAPGEF4	0.661444	-0.530258	-1.1917	7.1576	50.2305	1.73349e-21	6.0588e-20
KCNQ4	1.28328	1.0106	-0.272679	1.47153	50.1656	1.83845e-21	6.41436e-20
KHDRBS2	-0.518705	0.819527	1.33823	6.68385	50.1476	1.86875e-21	6.51436e-20
RTEL1	1.21352	1.45612	0.242602	4.29339	50.0558	2.03089e-21	7.07333e-20
CTDSPL	-1.8155	-0.996199	0.819298	2.51357	50.0154	2.10667e-21	7.33083e-20
LOC693877	0.531114	1.91131	1.38019	3.23535	49.9712	2.19281e-21	7.61724e-20
GABRA1	0.503301	1.0747	0.571394	7.59493	49.9644	2.20638e-21	7.65766e-20
LOC114679339	1.56235	0.303428	-1.25892	3.88349	49.9503	2.23482e-21	7.74959e-20
FRMPD1	0.149967	-1.57852	-1.72848	4.38217	49.9303	2.27584e-21	7.88496e-20
LOC114678853	1.65609	0.114397	-1.54169	2.61404	49.881	2.37989e-21	8.23104e-20
FBXL13	0.344824	-1.08362	-1.42844	5.68098	49.8608	2.42384e-21	8.37577e-20
PNN	0.225329	-1.11651	-1.34184	6.66794	49.8551	2.43649e-21	8.41214e-20
AP2A1	-0.8341	0.239882	1.07398	5.12473	49.8528	2.44152e-21	8.42218e-20
WDR27	1.1609	0.74248	-0.418416	6.36181	49.8465	2.45551e-21	8.46308e-20
LOC106992993	-1.49628	-0.704295	0.791983	1.42855	49.7119	2.77436e-21	9.53718e-20
SPATA13	1.0657	1.3944	0.328704	2.48121	49.6586	2.91192e-21	9.99613e-20
PJA1	1.80729	0.213651	-1.59364	4.10852	49.6582	2.91291e-21	9.99613e-20
CTSA	1.6078	1.04418	-0.563615	3.77838	49.6514	2.93087e-21	1.00491e-19
UBXN4	0.0581577	-1.05497	-1.11313	6.38247	49.6362	2.97172e-21	1.01715e-19
PLCG1	1.08147	1.38243	0.300962	4.60583	49.6351	2.97458e-21	1.01725e-19
LOC707383	0.0939286	-1.2393	-1.33323	1.74414	49.6139	3.03252e-21	1.03618e-19
MYO16	0.248683	-0.909787	-1.15847	7.7936	49.6057	3.05511e-21	1.04257e-19
CTXN2	1.42163	1.30747	-0.114167	1.45414	49.6039	3.05996e-21	1.04286e-19
SLC27A5	0.327378	1.60874	1.28136	1.4806	49.4856	3.40691e-21	1.15911e-19
SYT16	-1.09734	-0.702599	0.394744	6.67661	49.4163	3.62814e-21	1.23226e-19
VASH2	-1.07661	-0.197694	0.878915	0.975581	49.399	3.6855e-21	1.25067e-19
KLHDC8B	0.0490013	-1.47052	-1.51952	1.24077	49.3647	3.802e-21	1.2891e-19
NAB1	0.595928	-1.37113	-1.96706	3.91064	49.3318	3.91749e-21	1.32713e-19
GFRAL	0.389983	-1.22201	-1.61199	1.21209	49.3005	4.03028e-21	1.36301e-19
CCDC151	0.885044	1.55267	0.667626	1.92495	49.282	4.09869e-21	1.38497e-19
LOC114673684	1.73684	0.946093	-0.790746	4.78166	49.2653	4.16138e-21	1.40495e-19
ADAM11	0.698968	1.04987	0.350905	6.7399	49.2568	4.19336e-21	1.41455e-19
LCA5L	1.34183	1.49962	0.157788	3.61355	49.2462	4.23412e-21	1.42708e-19
AK4	0.071141	1.52392	1.45278	2.0432	49.1856	4.47365e-21	1.50653e-19
RAD54B	1.42916	1.24604	-0.183115	4.49313	49.1728	4.52584e-21	1.52282e-19
RIMKLB	-0.0401712	-1.46799	-1.42781	4.24655	49.164	4.56237e-21	1.53381e-19
NPTXR	0.118847	-0.920253	-1.0391	0.987669	49.1492	4.62397e-21	1.5532e-19
LOC106993722	-1.05012	-0.0495998	1.00052	1.02165	49.1228	4.73603e-21	1.58815e-19
COL4A1	1.50888	0.155381	-1.3535	3.71849	49.069	4.97354e-21	1.66498e-19
PSMA6	-0.0416944	1.16239	1.20409	5.1671	49.031	5.14823e-21	1.72201e-19
LOC114676202	1.17932	1.34758	0.168256	1.34904	48.9233	5.67736e-21	1.8958e-19
CSDC2	-0.192724	1.15323	1.34596	4.89808	48.875	5.93205e-21	1.97918e-19
DPH7	0.684139	1.81778	1.13364	3.80099	48.8443	6.09962e-21	2.03338e-19
PDE4B	-1.69743	-0.146864	1.55056	4.13044	48.8341	6.15655e-21	2.05063e-19
SH3BGR	1.26691	1.4284	0.16149	2.95382	48.7881	6.41982e-21	2.13295e-19
SNX18	1.65818	0.820742	-0.837433	4.4826	48.7568	6.60485e-21	2.19235e-19
LOC106998914	0.993054	1.15688	0.163823	1.59191	48.7555	6.61266e-21	2.19235e-19
VAX2	0.385941	-1.03961	-1.42555	1.14255	48.7547	6.61727e-21	2.19235e-19
FOXO1	1.4835	1.31993	-0.163571	4.85517	48.7237	6.80644e-21	2.25197e-19
MMP17	0.209461	1.70886	1.49939	2.80034	48.6488	7.28615e-21	2.40667e-19
KCNG2	-0.278007	-1.92225	-1.64424	3.5964	48.5947	7.65324e-21	2.52583e-19
EMB	0.800942	-0.556938	-1.35788	5.63298	48.5165	8.21724e-21	2.70971e-19
LOC114679978	-0.806624	0.303276	1.1099	3.15189	48.3597	9.47715e-21	3.1174e-19
LOC106992414	0.492626	1.21364	0.721014	0.880662	48.2962	1.00407e-20	3.30004e-19
PKNOX2	1.23071	-0.155293	-1.38601	4.97792	48.2045	1.09143e-20	3.58123e-19
MAP3K8	0.723707	1.73583	1.01212	1.76112	48.1968	1.09913e-20	3.60055e-19
LOC106993954	1.15884	1.21149	0.0526528	1.21451	48.1148	1.18419e-20	3.87279e-19
RNASEL	-1.05538	-0.160199	0.895182	0.777883	48.1126	1.18667e-20	3.87769e-19
SLC35F1	-0.0843245	1.62996	1.71428	2.39573	48.0891	1.21232e-20	3.95826e-19
ABCB4	-1.26753	-0.157172	1.11036	1.27329	48.0818	1.22034e-20	3.98116e-19
LOC106998367	1.4562	0.0268727	-1.42933	2.47225	48.0716	1.23174e-20	4.01505e-19
C1H1orf159	0.403991	1.66085	1.25686	3.6964	48.022	1.28867e-20	4.19716e-19
LOC114672689	0.777083	1.55364	0.776557	5.02146	48.003	1.31109e-20	4.26669e-19
LOC100425173	0.47604	-0.933136	-1.40918	2.19781	47.9998	1.31491e-20	4.27562e-19
LOC114678863	0.837277	-0.966791	-1.80407	4.58518	47.989	1.32794e-20	4.31443e-19
R3HCC1	-1.05426	0.681788	1.73605	3.84121	47.9687	1.3527e-20	4.39128e-19
PKP2	1.16255	1.04635	-0.116201	2.1331	47.9305	1.40053e-20	4.54283e-19
SCN4B	0.823826	1.01462	0.190796	6.63479	47.9222	1.41115e-20	4.57355e-19
LOC100423131	1.38469	1.00981	-0.374882	1.81069	47.8981	1.44241e-20	4.67105e-19
LOC114672370	1.30986	0.909869	-0.399994	1.44299	47.8651	1.4864e-20	4.80959e-19
ARHGEF26	-1.6264	-1.51529	0.111111	2.83869	47.8365	1.52569e-20	4.92867e-19
C14H11orf87	-0.222185	1.43259	1.65477	4.41812	47.8019	1.57447e-20	5.08212e-19
TPCN1	0.00181772	-1.48825	-1.49006	4.27957	47.6827	1.75497e-20	5.64635e-19
RAB27B	1.10137	1.51662	0.415251	5.69542	47.6391	1.8261e-20	5.87046e-19
SLCO1C1	-1.14693	0.753634	1.90056	2.43081	47.5398	1.99902e-20	6.41595e-19
FHL5	1.94305	1.93588	-0.00717074	3.30012	47.5235	2.02899e-20	6.50687e-19
LOC106998500	-0.608823	-1.322	-0.713177	5.73382	47.5077	2.05829e-20	6.59552e-19
C5H4orf19	0.784347	1.86574	1.0814	4.69196	47.4796	2.11178e-20	6.76145e-19
ETFRF1	1.26454	-0.392308	-1.65684	3.14782	47.4539	2.16171e-20	6.91017e-19
POC5	-0.320742	-1.85861	-1.53786	2.85566	47.4327	2.20398e-20	7.0396e-19
CERCAM	0.739402	-0.45957	-1.19897	1.29295	47.3295	2.42134e-20	7.72144e-19
LOC693603	-1.18109	-0.185394	0.995693	1.50165	47.2839	2.52389e-20	8.04199e-19
LOC706802	0.752595	1.18047	0.427871	1.05287	47.207	2.7073e-20	8.61947e-19
ATG16L2	0.557213	1.63275	1.07553	4.19869	47.1892	2.7515e-20	8.75317e-19
GOLIM4	1.22697	0.864612	-0.362353	5.34568	47.0389	3.1557e-20	1.00122e-18
GINS1	0.406542	-0.957129	-1.36367	2.12994	47.0383	3.15738e-20	1.00122e-18
VSTM2A	1.44281	1.68346	0.240652	3.05565	47.028	3.18728e-20	1.0099e-18
MCEE	1.0455	-0.820166	-1.86567	3.07434	47.0247	3.19689e-20	1.01213e-18
CENPC	-0.116243	-1.30755	-1.1913	6.22633	46.9964	3.28033e-20	1.0369e-18
CALM3	0.689285	1.31992	0.630631	4.64434	46.9651	3.37544e-20	1.06611e-18
ACTN1	-0.340196	-1.62019	-1.27999	3.63164	46.8571	3.72487e-20	1.17367e-18
REELD1	1.0029	-0.622012	-1.62491	1.48598	46.7636	4.05657e-20	1.27718e-18
ARSJ	-1.367	-0.562166	0.804833	1.20471	46.7581	4.07686e-20	1.28255e-18
AMMECR1	1.53159	1.32296	-0.208628	3.17061	46.7294	4.18503e-20	1.31516e-18
TRIM69	0.804833	-1.24136	-2.04619	3.39199	46.7288	4.18715e-20	1.31516e-18
PROC	1.02251	0.515566	-0.50694	0.958959	46.6782	4.385e-20	1.37621e-18
CINP	0.469962	-1.18213	-1.65209	1.95676	46.6635	4.44458e-20	1.39381e-18
MUC4	0.162648	1.83704	1.67439	2.2104	46.6496	4.50118e-20	1.41044e-18
LOC106996788	1.06841	-0.216848	-1.28526	0.970512	46.636	4.55753e-20	1.42697e-18
LATS2	1.19767	1.53183	0.334159	3.94293	46.5943	4.73399e-20	1.48105e-18
ACOXL	0.803646	1.70402	0.900375	1.29553	46.568	4.84913e-20	1.51588e-18
C14H11orf97	-0.421266	1.18023	1.6015	1.41714	46.5017	5.15155e-20	1.60788e-18
LOC114673043	0.81886	1.13306	0.314199	1.31318	46.4999	5.15985e-20	1.60921e-18
LOC114679327	1.84368	0.695644	-1.14804	4.24306	46.4967	5.17506e-20	1.61268e-18
LOC114670908	-0.888687	0.202809	1.0915	0.821824	46.4725	5.29067e-20	1.64612e-18
ANKRD29	0.670651	-0.456306	-1.12696	5.43217	46.4644	5.33027e-20	1.65585e-18
SORD	-0.0232427	1.63829	1.66153	3.43475	46.436	5.46999e-20	1.69792e-18
ISG20	1.52605	1.05108	-0.474969	2.28957	46.4021	5.64204e-20	1.74996e-18
LOC114670804	0.909888	1.03002	0.120127	0.696065	46.3938	5.68474e-20	1.76183e-18
LOC721699	-1.52773	-1.17144	0.356289	3.23572	46.3424	5.95789e-20	1.84504e-18
GNAT2	1.31652	1.80179	0.485272	2.92573	46.2923	6.23719e-20	1.93003e-18
RIMS3	-0.810065	0.942362	1.75243	3.95151	46.2698	6.36613e-20	1.96839e-18
DPP9	0.534753	1.27469	0.739936	4.52675	46.253	6.46455e-20	1.99726e-18
DUSP4	-1.08094	0.0140198	1.09496	0.996838	46.2488	6.4894e-20	2.002e-18
RELN	1.06717	0.644238	-0.422934	2.15933	46.2487	6.48999e-20	2.002e-18
PDGFRL	1.37068	-0.0473549	-1.41804	2.52178	46.2268	6.62111e-20	2.04087e-18
FTCDNL1	1.21325	0.995753	-0.217493	1.52302	46.216	6.68689e-20	2.05954e-18
LOC114677538	1.48532	1.83441	0.349088	3.83267	46.1795	6.91365e-20	2.12773e-18
TBRG1	1.38351	-0.00891721	-1.39243	4.37567	46.1701	6.97297e-20	2.14432e-18
ESF1	0.416941	-0.794113	-1.21105	5.70611	45.9909	8.21375e-20	2.51808e-18
ACADL	-0.064707	1.6745	1.73921	2.42302	45.9889	8.22824e-20	2.52057e-18
LOC106997927	1.38476	0.803349	-0.581409	1.8505	45.9626	8.42903e-20	2.58009e-18
HHIPL1	0.877097	1.78446	0.907363	1.96198	45.9591	8.45609e-20	2.58638e-18
MAPK8IP2	0.591609	1.41061	0.818998	4.04877	45.935	8.64367e-20	2.64171e-18
OSBPL3	-0.941265	-1.28038	-0.33911	1.3026	45.928	8.69919e-20	2.65663e-18
LOC114672398	-1.09068	-0.290733	0.799952	0.806351	45.9213	8.7531e-20	2.67104e-18
CENPP	1.22722	0.160588	-1.06663	3.38019	45.9011	8.91589e-20	2.71863e-18
TM7SF2	0.944904	-0.897721	-1.84262	2.55741	45.7229	1.04929e-19	3.1848e-18
LOC106994458	-0.668988	0.864438	1.53343	1.09364	45.7013	1.0702e-19	3.24577e-18
LOC114671835	0.154689	-0.921311	-1.076	0.536556	45.6783	1.09292e-19	3.31217e-18
GTPBP6	-1.48564	-0.58326	0.902375	2.56758	45.6107	1.16264e-19	3.51806e-18
LOC701437	1.62682	0.253103	-1.37372	3.60276	45.596	1.17841e-19	3.56307e-18
DEF6	1.38728	0.846725	-0.540558	2.22359	45.5921	1.18257e-19	3.57293e-18
ZPBP	-1.09789	1.29587	2.39376	3.95584	45.5816	1.19398e-19	3.60465e-18
LPA	1.23991	0.437204	-0.802702	1.24954	45.5725	1.20399e-19	3.63211e-18
PAQR9	1.53341	0.433953	-1.09945	4.08389	45.5467	1.23275e-19	3.71604e-18
LOC114671402	1.35241	1.31055	-0.0418668	2.14325	45.4666	1.32635e-19	3.99516e-18
LOC106995672	-0.0697033	1.19629	1.26599	1.74835	45.4187	1.38582e-19	4.16797e-18
CYFIP1	0.276357	-0.937594	-1.21395	2.07366	45.306	1.53631e-19	4.60662e-18
LOC114677066	1.26628	1.72188	0.455604	2.34002	45.2843	1.56713e-19	4.69546e-18
GGACT	0.492805	-1.38116	-1.87396	3.20379	45.1708	1.73863e-19	5.19755e-18
HES6	1.53587	0.57475	-0.961118	2.87168	45.1678	1.74332e-19	5.20765e-18
DARS2	1.34152	0.338109	-1.00341	2.43188	45.1012	1.85296e-19	5.52683e-18
LOC114676844	0.588162	-0.578419	-1.16658	6.55653	45.0651	1.91511e-19	5.70793e-18
NEB	0.40669	2.00108	1.59439	3.67718	45.041	1.95793e-19	5.8268e-18
RASSF2	0.899271	1.80444	0.905168	2.90224	44.9762	2.07753e-19	6.16883e-18
LOC106997619	-0.898376	-2.03525	-1.13688	4.13501	44.9676	2.09397e-19	6.21299e-18
TSPYL1	1.22504	1.79631	0.571273	3.03088	44.9236	2.17997e-19	6.46334e-18
LMNA	0.870763	-0.505581	-1.37634	3.19689	44.8919	2.2443e-19	6.64412e-18
LOC100426413	1.06528	1.79619	0.730909	2.15838	44.8559	2.31949e-19	6.85651e-18
STYXL1	1.13286	0.605002	-0.527854	2.76235	44.7599	2.53247e-19	7.45828e-18
LOC106993829	1.02369	1.36639	0.342695	1.19119	44.7505	2.55456e-19	7.51777e-18
CLK1	1.23077	0.711697	-0.519078	5.47419	44.7374	2.58522e-19	7.60236e-18
LOC106999775	-1.67969	-0.909019	0.770669	4.19742	44.736	2.58866e-19	7.60682e-18
RPL28	0.87004	1.15438	0.284341	1.45835	44.7083	2.65498e-19	7.79018e-18
PPP2R3B	0.636295	1.59216	0.955868	1.95691	44.647	2.80857e-19	8.22258e-18
MAD1L1	0.518079	1.40189	0.883808	4.89884	44.6056	2.91689e-19	8.53342e-18
GNB1L	0.543485	1.47564	0.932156	4.04471	44.5767	2.99535e-19	8.75004e-18
CYP3A43	0.369659	-0.865029	-1.23469	1.01368	44.5758	2.99784e-19	8.75087e-18
MRC2	1.01278	1.33761	0.324828	5.24997	44.5067	3.19376e-19	9.30906e-18
LOC114671458	0.0905779	-1.71065	-1.80123	2.07276	44.4578	3.34e-19	9.72104e-18
KIN	0.140682	-1.52398	-1.66466	2.97924	44.457	3.34248e-19	9.72113e-18
GALNT18	0.249136	-1.97806	-2.22719	3.76718	44.4536	3.35278e-19	9.74395e-18
SMPD1	1.27938	-0.0304698	-1.30985	3.75788	44.4232	3.4475e-19	9.99725e-18
FAM200B	0.88825	-1.01278	-1.90103	3.91925	44.4008	3.51909e-19	1.01974e-17
OXSM	1.18959	-0.626465	-1.81605	2.84232	44.3658	3.6339e-19	1.05224e-17
LOC106999065	-0.865595	0.319885	1.18548	1.07821	44.3317	3.74927e-19	1.08485e-17
NUGGC	1.0251	0.793128	-0.231968	1.28566	44.2982	3.8661e-19	1.11784e-17
LOC695854	0.0440636	-1.12251	-1.16657	0.811495	44.2941	3.88065e-19	1.12123e-17
P4HA3	1.55683	0.904325	-0.652509	2.34083	44.263	3.99267e-19	1.15276e-17
LOC100428184	-1.23716	0.00671212	1.24387	1.35694	44.2503	4.0396e-19	1.16546e-17
TMEM47	1.43928	0.487087	-0.952198	2.34293	44.2238	4.13891e-19	1.19324e-17
LOC107000791	1.43072	1.45985	0.0291256	2.60015	44.2137	4.17738e-19	1.20346e-17
SEPTIN10	0.55707	-1.12709	-1.68416	3.88224	44.1507	4.42583e-19	1.27411e-17
TAF1B	-0.30335	-1.56236	-1.25901	4.41138	44.0874	4.69015e-19	1.34923e-17
LOC106993519	1.44689	0.686044	-0.760843	1.82077	44.0687	4.77129e-19	1.37157e-17
MFAP3L	1.24108	1.57017	0.32909	3.7546	44.0601	4.80891e-19	1.38139e-17
PLA2G12B	0.832605	1.21671	0.384108	1.16467	44.0357	4.91797e-19	1.41169e-17
LOC114670803	1.15867	1.09527	-0.0633949	4.45329	43.9952	5.10414e-19	1.46407e-17
OTUD3	-0.959001	0.529482	1.48848	5.00772	43.986	5.14708e-19	1.47532e-17
VWA7	-0.200131	1.17854	1.37868	2.73397	43.935	5.39359e-19	1.54487e-17
GRK5	0.065682	1.25491	1.18922	5.59339	43.9185	5.47599e-19	1.56621e-17
NEK11	1.01197	-0.45535	-1.46732	5.56323	43.9046	5.54634e-19	1.58518e-17
ABCD2	1.3308	-0.239915	-1.57071	3.46072	43.8586	5.78547e-19	1.65234e-17
MYT1	1.1573	0.331038	-0.826262	4.74618	43.8489	5.83694e-19	1.66464e-17
CASP6	1.24306	1.46074	0.217682	2.60098	43.8334	5.92062e-19	1.68729e-17
LRRK1	0.826494	1.55189	0.725394	5.60121	43.8251	5.96577e-19	1.69772e-17
GABRA2	-1.22073	-1.98857	-0.767842	4.29342	43.8155	6.01848e-19	1.71149e-17
LOC100426576	-0.0238845	-1.44825	-1.42437	1.13596	43.8072	6.0644e-19	1.72331e-17
HYKK	-0.683025	0.968213	1.65124	2.19478	43.8001	6.10423e-19	1.73339e-17
MON1A	0.42419	-1.15359	-1.57778	3.80134	43.7893	6.16485e-19	1.74935e-17
LOC114679319	0.582481	1.371	0.788521	0.980347	43.7743	6.25044e-19	1.77237e-17
SMIM17	1.27656	1.15684	-0.119724	1.69471	43.689	6.75965e-19	1.91539e-17
VGF	-1.2555	-0.702129	0.553369	1.90725	43.688	6.76543e-19	1.91567e-17
SPINK13	-1.05103	0.857533	1.90856	2.63352	43.6816	6.80564e-19	1.92567e-17
CCDC39	0.740409	-0.503574	-1.24398	5.62997	43.6685	6.88796e-19	1.94758e-17
POMT1	1.10957	1.30012	0.190552	4.3238	43.6463	7.02935e-19	1.98614e-17
LOC106998712	0.294576	-1.14205	-1.43663	1.2225	43.587	7.42242e-19	2.09422e-17
RTN4IP1	0.236565	-1.45159	-1.68816	3.84191	43.4963	8.06691e-19	2.27283e-17
RHBDL2	0.325417	1.21247	0.887057	6.23491	43.4801	8.18783e-19	2.30526e-17
XPO1	-0.250759	0.950098	1.20086	5.64916	43.3948	8.85507e-19	2.49135e-17
LOC106997292	0.842668	1.88033	1.03766	2.81377	43.3889	8.90276e-19	2.50299e-17
THOP1	0.0143202	1.44567	1.43135	3.34727	43.3826	8.95433e-19	2.51571e-17
TGFBR2	1.46547	2.1074	0.641934	4.91154	43.3714	9.04754e-19	2.5383e-17
LOC106999324	1.07036	0.250489	-0.819874	1.57326	43.3678	9.07731e-19	2.54485e-17
LOC106993304	1.27566	0.161246	-1.11441	4.32732	43.3318	9.38211e-19	2.62845e-17
CAMKK2	-0.00998204	1.13811	1.14809	5.22738	43.3219	9.46771e-19	2.65056e-17
MRPL41	1.11852	1.34422	0.225695	2.02785	43.255	1.00677e-18	2.81258e-17
ATP6AP1L	0.0300961	1.56214	1.53205	4.865	43.2536	1.00806e-18	2.81419e-17
LOC114674856	1.28712	1.53847	0.251354	2.22187	43.2446	1.01641e-18	2.83351e-17
LOC106993730	-1.09168	0.728336	1.82002	3.75831	43.2048	1.05432e-18	2.93098e-17
GREM1	1.10416	1.67129	0.567129	2.00619	43.1996	1.05934e-18	2.94287e-17
E2F5	1.05709	1.53601	0.478917	4.93209	43.1909	1.06783e-18	2.96228e-17
PTPRC	0.723083	1.90887	1.18579	2.03443	43.1727	1.08587e-18	3.01023e-17
TPTE2	0.751896	1.78652	1.03463	4.55029	43.0106	1.26025e-18	3.48391e-17
NUDT9	0.581757	-1.11027	-1.69203	4.04124	42.9685	1.30986e-18	3.61854e-17
TBCE	-0.268115	-1.10493	-0.836815	5.90092	42.9649	1.31423e-18	3.62809e-17
CBR4	0.480586	1.85757	1.37699	4.73754	42.9267	1.36118e-18	3.75206e-17
LOC114673581	-0.931882	0.518525	1.45041	1.3974	42.9261	1.36198e-18	3.75206e-17
TNFRSF11B	0.0984952	-1.02457	-1.12306	0.677704	42.8855	1.41376e-18	3.89068e-17
ACAD10	0.231865	-1.14495	-1.37681	2.94621	42.8851	1.41426e-18	3.89068e-17
LOC114678434	1.49005	0.984476	-0.505578	2.09721	42.8806	1.42015e-18	3.90418e-17
USP45	1.01535	1.0747	0.0593557	5.59628	42.8774	1.42429e-18	3.91286e-17
ABCA8	0.497601	-0.971438	-1.46904	1.5172	42.8487	1.46231e-18	4.01452e-17
ZIC4	1.49848	0.927033	-0.571443	3.4229	42.7655	1.57862e-18	4.32784e-17
RYR1	0.484177	-0.824496	-1.30867	3.35462	42.5908	1.85362e-18	5.07125e-17
FAM53C	1.29602	1.34406	0.048035	3.19728	42.5788	1.87418e-18	5.12395e-17
PRDX3	1.34247	0.216691	-1.12578	4.1482	42.5566	1.91281e-18	5.22597e-17
LOC721761	-1.14251	-1.41859	-0.276074	1.81702	42.5454	1.93266e-18	5.27657e-17
LOC106994239	1.31772	0.73511	-0.582609	4.08365	42.534	1.95296e-18	5.32833e-17
MDFIC	0.931634	-1.16261	-2.09425	3.81286	42.5178	1.98227e-18	5.40459e-17
LOC100430622	-0.405072	1.43311	1.83818	3.38709	42.5032	2.00902e-18	5.47e-17
LOC106996527	0.362773	1.17082	0.808047	1.34195	42.4663	2.07854e-18	5.64764e-17
LOC114676796	0.701395	-0.618523	-1.31992	1.73966	42.4648	2.08125e-18	5.65114e-17
LOC106992612	0.441582	1.79121	1.34963	4.67027	42.4231	2.16263e-18	5.8681e-17
FBXL21P	0.313448	1.78376	1.47031	2.16805	42.3537	2.30527e-18	6.25086e-17
ARHGAP29	1.15836	-0.331964	-1.49032	1.63348	42.3275	2.3615e-18	6.39459e-17
LOC106999295	1.35702	1.16174	-0.195276	1.7365	42.3262	2.36434e-18	6.3979e-17
LOC708994	0.0390015	-1.49872	-1.53773	5.54013	42.3165	2.38544e-18	6.45061e-17
EXT1	-0.089581	1.33608	1.42566	5.97001	42.1679	2.73499e-18	7.37072e-17
CPNE6	-1.04775	-1.84783	-0.800085	3.33951	42.1156	2.86994e-18	7.72852e-17
ANXA3	-1.12599	0.628241	1.75424	2.60067	42.115	2.87165e-18	7.72852e-17
IL1R1	1.23683	-0.591246	-1.82808	3.3251	42.0965	2.92075e-18	7.85533e-17
IDH1	-0.443809	-1.83413	-1.39032	2.31138	42.0562	3.03121e-18	8.13587e-17
LOC114678913	-1.67798	-0.517981	1.16	2.54827	42.0267	3.1147e-18	8.3543e-17
DPYSL4	1.37362	1.3059	-0.0677135	2.29173	41.9363	3.38495e-18	9.07304e-17
PACSIN3	0.0288574	1.44197	1.41312	1.57486	41.9131	3.4579e-18	9.25607e-17
FOXK1	-0.332086	0.853401	1.18549	5.60763	41.8766	3.57634e-18	9.56666e-17
IMPG2	1.48033	0.560437	-0.919896	2.02045	41.8362	3.71185e-18	9.92245e-17
SFMBT2	0.788696	1.70889	0.920193	2.76807	41.8036	3.82486e-18	1.01971e-16
LOC710452	1.1701	0.252276	-0.917824	1.51893	41.763	3.97064e-18	1.05644e-16
TRPS1	-0.0991255	1.34929	1.44841	6.46332	41.7595	3.98355e-18	1.05916e-16
ASB1	0.0133444	-1.44652	-1.45987	4.70615	41.7151	4.14987e-18	1.10191e-16
C11H12orf40	-1.37189	0.505204	1.87709	3.54752	41.7101	4.16895e-18	1.10624e-16
ZSCAN30	1.5596	1.05417	-0.505422	3.10271	41.6057	4.58949e-18	1.2162e-16
LOC106997182	0.791652	-0.418265	-1.20992	0.899384	41.5796	4.70134e-18	1.24501e-16
LOC106998972	0.262065	-1.10179	-1.36385	1.20195	41.577	4.71284e-18	1.24722e-16
LOC106996810	0.229116	-0.783713	-1.01283	0.448615	41.564	4.76928e-18	1.26131e-16
LOC106993842	0.104633	1.54745	1.44282	4.15477	41.5615	4.78036e-18	1.2634e-16
LOC697176	0.588584	-1.30282	-1.8914	2.80006	41.5528	4.81896e-18	1.27276e-16
MICU2	0.176156	-0.879696	-1.05585	6.32443	41.5267	4.93636e-18	1.3029e-16
CA11	1.0529	0.107003	-0.945901	4.58967	41.461	5.24408e-18	1.3832e-16
LOC114673444	-1.01689	-0.0869954	0.929892	0.963945	41.3772	5.66531e-18	1.49331e-16
STOX1	0.778564	1.05686	0.278301	2.38536	41.3723	5.69111e-18	1.49911e-16
C10H22orf39	1.42225	0.0400331	-1.38222	2.83321	41.3335	5.89838e-18	1.55268e-16
SRSF10	0.80943	-0.83212	-1.64155	4.11939	41.2831	6.17849e-18	1.62211e-16
DNAJB13	0.750486	-0.951598	-1.70208	2.48092	41.2501	6.36935e-18	1.67001e-16
AGA	0.544215	-1.07274	-1.61696	1.84826	41.2464	6.39137e-18	1.67467e-16
PEBP1	1.27272	0.845966	-0.42675	2.48074	41.2336	6.46734e-18	1.69346e-16
NREP	1.4494	1.22696	-0.222433	4.25638	41.1932	6.71226e-18	1.75643e-16
LOC114673764	1.16907	1.18021	0.0111392	2.1023	41.1136	7.22355e-18	1.88774e-16
CD55	-0.957104	-1.76223	-0.805122	1.92334	41.0929	7.36277e-18	1.92285e-16
LOC106994120	0.866054	1.32123	0.455178	1.33778	41.0568	7.61207e-18	1.98534e-16
GPS1	-0.0655431	1.37953	1.44507	4.6044	41.0532	7.63732e-18	1.99062e-16
COL5A2	0.535343	-1.10714	-1.64248	3.059	41.0305	7.79896e-18	2.03142e-16
XPC	1.24896	0.386508	-0.862452	5.095	40.989	8.10302e-18	2.10785e-16
GALC	1.04138	-0.343706	-1.38508	1.61489	40.9799	8.17133e-18	2.12283e-16
LOC106998768	1.43522	0.60203	-0.833194	1.77495	40.9236	8.60719e-18	2.2346e-16
LOC715736	0.332298	-0.739347	-1.07165	0.829615	40.9111	8.70674e-18	2.25897e-16
SMOX	1.03028	1.56881	0.538524	3.20201	40.9094	8.721e-18	2.26119e-16
CCDC73	1.05786	0.740359	-0.317502	1.97773	40.8991	8.80387e-18	2.28119e-16
ADAMTSL3	1.26459	0.680548	-0.584039	7.39001	40.8572	9.15083e-18	2.36645e-16
NHS	0.578532	1.73693	1.15839	2.21492	40.8426	9.27501e-18	2.39571e-16
CTNNAL1	-0.600944	0.504929	1.10587	6.2908	40.8148	9.51639e-18	2.45459e-16
NME5	0.403402	-1.16835	-1.57175	3.54768	40.7304	1.02866e-17	2.64809e-16
C15H9orf24	1.12867	-0.620995	-1.74966	3.22988	40.7291	1.0299e-17	2.64956e-16
TARSL2	-0.51111	-1.384	-0.872887	5.84476	40.7047	1.05333e-17	2.70808e-16
ADGRF3	1.36197	0.784711	-0.577255	3.98452	40.6705	1.0871e-17	2.79309e-16
SOCS6	1.37945	1.11366	-0.265796	3.80688	40.6459	1.11213e-17	2.85369e-16
ABCG4	1.35621	0.579248	-0.776962	4.26037	40.5938	1.16687e-17	2.98836e-16
IFNGR2	0.917821	-0.484093	-1.40191	3.69573	40.5732	1.1893e-17	3.04384e-16
LOC114678231	-0.0590557	-1.00739	-0.948333	0.555601	40.5413	1.22479e-17	3.13266e-16
CACNG5	-0.727699	0.980079	1.70778	3.7245	40.5385	1.22804e-17	3.13894e-16
CARD19	-0.81579	-1.27256	-0.456766	4.27013	40.525	1.24341e-17	3.17618e-16
ATL2	0.92661	1.21535	0.288743	4.885	40.508	1.2631e-17	3.22439e-16
TATDN1	1.04757	0.0877852	-0.959783	5.36823	40.4911	1.28298e-17	3.27304e-16
RFTN1	1.23855	0.0794973	-1.15906	1.76921	40.4714	1.30648e-17	3.33084e-16
SPRY1	0.699646	1.45962	0.759974	1.37102	40.4603	1.31993e-17	3.36299e-16
ILDR2	0.815145	1.41523	0.600087	5.41527	40.4487	1.33419e-17	3.39714e-16
LOC106993784	0.498697	-0.907429	-1.40613	1.54069	40.42	1.36999e-17	3.48606e-16
LOC114673816	0.267787	-1.09308	-1.36087	1.17834	40.3766	1.42591e-17	3.62603e-16
RAPGEF1	-0.311952	0.900228	1.21218	5.92734	40.3231	1.49814e-17	3.80725e-16
VSIG10	0.576193	-0.833964	-1.41016	4.5788	40.3055	1.5227e-17	3.8672e-16
HSF5	1.22576	-0.000278598	-1.22603	2.72517	40.2471	1.60715e-17	4.07385e-16
MXI1	1.10548	-0.242695	-1.34817	4.41291	40.2358	1.62406e-17	4.11407e-16
SYT13	0.797133	1.06929	0.272157	6.01407	40.2128	1.65881e-17	4.19943e-16
CPQ	-0.894868	0.96522	1.86009	3.86012	40.2059	1.66952e-17	4.22385e-16
UQCRC1	0.126633	1.17138	1.04475	6.0655	40.1853	1.70148e-17	4.30196e-16
TTC6	1.51701	0.381802	-1.13521	2.86766	40.1503	1.75748e-17	4.4379e-16
HSD17B6	0.908376	-0.15619	-1.06457	1.52774	40.1311	1.78895e-17	4.51448e-16
LOC106994592	1.23686	0.247766	-0.989094	1.57481	40.1184	1.81004e-17	4.56479e-16
GJC3	0.00015815	-1.01132	-1.01148	0.596659	40.0333	1.95806e-17	4.93496e-16
ZNF484	-0.0308209	-1.41103	-1.38021	2.85385	40.0096	2.00143e-17	5.04106e-16
LOC114676829	0.208838	1.00365	0.794812	0.793171	39.9882	2.04138e-17	5.13843e-16
ALDH8A1	1.33073	-0.0664178	-1.39714	3.43334	39.984	2.04931e-17	5.1551e-16
CACNA2D2	0.955311	-0.355242	-1.31055	1.71953	39.958	2.09909e-17	5.27031e-16
TMEM268	0.878558	-0.595383	-1.47394	3.6965	39.9499	2.11491e-17	5.30331e-16
LOC114673574	-1.03361	-0.353629	0.679981	0.588317	39.8983	2.21817e-17	5.55523e-16
DPH5	1.17044	1.5266	0.356165	4.09898	39.8814	2.2532e-17	5.6394e-16
RPP14	1.24503	0.47095	-0.774079	4.61411	39.6908	2.68724e-17	6.70458e-16
LOC106999895	0.511281	-1.088	-1.59928	1.95971	39.5863	2.95987e-17	7.36625e-16
SH3GL1	-0.472435	1.0186	1.49103	4.07646	39.5851	2.96335e-17	7.37028e-16
ORC5	0.818025	-0.409574	-1.2276	5.90298	39.565	3.01883e-17	7.50358e-16
LOC718775	1.09969	-0.525846	-1.62554	2.92837	39.5457	3.07311e-17	7.6337e-16
HGFAC	0.381823	1.40279	1.02097	1.05187	39.5209	3.14439e-17	7.80297e-16
PLXNA1	1.02475	1.58704	0.562293	2.74492	39.4891	3.23845e-17	8.02933e-16
RAB21	1.20843	-0.0385056	-1.24694	4.27123	39.4836	3.25497e-17	8.06022e-16
ASRGL1	0.760861	-0.598522	-1.35938	4.9944	39.4747	3.28182e-17	8.12164e-16
MMD2	-0.671902	0.380366	1.05227	1.9286	39.4501	3.35735e-17	8.30338e-16
BACE2	1.28249	0.39972	-0.882771	5.06865	39.4206	3.45019e-17	8.52767e-16
LOC100424674	-0.299292	1.24778	1.54708	1.80086	39.3554	3.66479e-17	9.0468e-16
ATXN7L3B	1.43263	1.02409	-0.408542	3.03366	39.3526	3.67414e-17	9.06424e-16
LOC713152	0.949452	-0.05448	-1.00393	2.30452	39.2821	3.922e-17	9.652e-16
ST3GAL1	-0.649327	1.0124	1.66173	3.63271	39.2698	3.96694e-17	9.75022e-16
TEAD1	0.308792	-0.988215	-1.29701	5.89067	39.2622	3.99493e-17	9.81294e-16
LOC114676426	-0.843007	0.615924	1.45893	1.15675	39.2564	4.01621e-17	9.85909e-16
MATN2	0.652603	1.00965	0.357043	2.28287	39.2546	4.023e-17	9.86965e-16
LOC114671276	0.494888	-0.523794	-1.01868	0.554969	39.2271	4.12674e-17	1.01054e-15
GPR162	0.877032	1.52026	0.643232	3.99681	39.2152	4.17248e-17	1.02111e-15
PLK4	1.27912	0.32919	-0.949929	1.66555	39.1935	4.25717e-17	1.04055e-15
LOC114672100	-1.11345	-0.0576965	1.05575	0.924628	39.1494	4.43413e-17	1.08247e-15
LOC100429346	0.661995	-0.667911	-1.32991	5.76099	39.1366	4.48734e-17	1.09479e-15
TCL1B	0.793819	1.07489	0.28107	0.781318	39.0844	4.70909e-17	1.14748e-15
EPS15	-0.221059	-1.05349	-0.832427	6.01897	39.0699	4.7729e-17	1.1616e-15
B4GALNT1	1.24137	0.0436069	-1.19776	2.97252	39.0576	4.82752e-17	1.17417e-15
SEPSECS	0.0288932	-1.58265	-1.61154	2.40193	39.0023	5.08114e-17	1.23435e-15
LOC114673075	-0.868777	0.630346	1.49912	2.89069	38.9745	5.2137e-17	1.26423e-15
ADCY2	1.25414	0.239292	-1.01485	5.51693	38.9348	5.40877e-17	1.31073e-15
LOC106998907	1.05863	1.62097	0.562335	4.39093	38.933	5.418e-17	1.31216e-15
GRM3	0.756398	-0.603639	-1.36004	6.35339	38.9018	5.57681e-17	1.3498e-15
LOC114671297	-0.551135	0.956401	1.50754	1.48173	38.8851	5.66376e-17	1.37001e-15
MYH7B	0.111391	-1.51318	-1.62457	3.39575	38.8683	5.75235e-17	1.39059e-15
LOC114674137	-1.35497	0.0341848	1.38915	2.72963	38.8653	5.76819e-17	1.39357e-15
GCDH	-0.585905	0.888073	1.47398	1.67791	38.8237	5.99486e-17	1.44657e-15
LOC106995524	0.329564	1.12954	0.799978	1.85958	38.7883	6.19474e-17	1.49389e-15
2021-03-08	1.09298	0.735526	-0.35745	5.11388	38.7766	6.26225e-17	1.50926e-15
LOC114679334	-0.305961	0.708298	1.01426	1.62113	38.7696	6.30311e-17	1.51818e-15
HACL1	0.561969	-1.07531	-1.63728	3.49171	38.7289	6.54539e-17	1.57558e-15
SH2D3C	0.101668	-1.22302	-1.32469	3.18733	38.6698	6.91353e-17	1.66319e-15
BTBD18	1.10915	1.10116	-0.00798758	1.81249	38.647	7.06128e-17	1.6977e-15
EXD3	-0.476545	-1.35142	-0.874871	4.22102	38.6423	7.09168e-17	1.70295e-15
IPO13	1.13768	1.03124	-0.106444	3.90148	38.6387	7.11551e-17	1.70764e-15
POMGNT2	1.53877	0.652047	-0.886718	3.92405	38.6351	7.13936e-17	1.71232e-15
PER3	0.691843	-0.754211	-1.44605	5.31909	38.5857	7.47369e-17	1.78927e-15
TMOD1	0.287676	1.29624	1.00857	1.39945	38.5685	7.59359e-17	1.81687e-15
GRIN2D	-0.992346	-1.53659	-0.54424	3.28059	38.4821	8.22707e-17	1.96726e-15
KCNC3	1.13891	0.599506	-0.539401	3.78751	38.4795	8.24672e-17	1.97036e-15
LOC106996781	0.0598994	1.56602	1.50612	3.00893	38.4503	8.47258e-17	2.02231e-15
LOC106993999	1.09446	0.574844	-0.519618	1.17317	38.4479	8.49151e-17	2.02475e-15
NUDT8	-0.952226	0.0935585	1.04578	0.941824	38.4477	8.49303e-17	2.02475e-15
RTCA	-0.920959	-1.62637	-0.705407	3.77505	38.4064	8.8244e-17	2.10122e-15
STXBP3	0.239334	-0.820232	-1.05957	0.806228	38.3585	9.22494e-17	2.19358e-15
NDC80	0.886494	-0.663486	-1.54998	1.84694	38.3565	9.242e-17	2.19539e-15
AFMID	0.791504	1.21349	0.421983	1.84756	38.3193	9.56701e-17	2.27124e-15
IFT80	0.906807	-0.160138	-1.06694	5.39138	38.3022	9.71967e-17	2.3061e-15
LOC114672796	0.958603	-0.589552	-1.54816	2.79146	38.3012	9.72879e-17	2.30688e-15
AKAP17A	-1.35344	-0.304066	1.04937	2.63952	38.271	1.00052e-16	2.371e-15
LOC114676317	1.35667	0.296152	-1.06052	2.38527	38.2522	1.01803e-16	2.41105e-15
LOC114671765	-0.444785	-1.49236	-1.04757	1.25088	38.2436	1.02622e-16	2.42901e-15
PAFAH1B2	0.884688	-0.359795	-1.24448	4.44911	38.2385	1.0311e-16	2.43911e-15
LOC700544	1.27517	0.155074	-1.1201	2.12489	38.2063	1.06233e-16	2.51147e-15
LOC700087	0.977231	-0.332247	-1.30948	1.94233	38.1937	1.07476e-16	2.53785e-15
ARHGAP4	-0.972169	0.525418	1.49759	1.96102	38.1737	1.09494e-16	2.58242e-15
KCNQ2	0.565373	1.30794	0.742567	4.80737	38.167	1.10172e-16	2.59687e-15
P3H1	-0.0567967	1.23659	1.29339	4.98885	38.1653	1.10347e-16	2.59944e-15
KIF7	-0.452102	1.21681	1.66891	2.51968	38.0664	1.20952e-16	2.84083e-15
STON2	-1.4232	-0.848035	0.575161	2.42922	38.0588	1.21799e-16	2.85904e-15
LOC114674067	1.03308	0.656896	-0.376179	1.64402	38.0065	1.27853e-16	2.99937e-15
ABCB6	1.12603	1.62179	0.495753	2.92323	37.9535	1.34304e-16	3.14513e-15
AR	1.52954	0.920169	-0.609369	3.13733	37.939	1.36122e-16	3.18582e-15
STARD13	1.05138	1.54285	0.491471	3.52888	37.9296	1.37315e-16	3.21184e-15
HEG1	-0.123853	-1.76353	-1.63968	4.30054	37.9233	1.38123e-16	3.22885e-15
ZBTB32	-0.960644	0.112897	1.07354	1.51119	37.9073	1.4018e-16	3.275e-15
LOC114671785	0.259459	1.35447	1.09501	5.14687	37.8617	1.46244e-16	3.41465e-15
DOT1L	0.582648	1.19029	0.607638	4.06867	37.844	1.48656e-16	3.46893e-15
CSTB	0.354985	-1.13983	-1.49481	1.97977	37.8301	1.5059e-16	3.50993e-15
SCUBE2	1.04084	0.912419	-0.128417	1.34948	37.8119	1.53156e-16	3.56554e-15
LOC106995720	0.2048	1.13485	0.930052	7.07079	37.8051	1.5412e-16	3.58588e-15
SASH1	0.441886	1.27698	0.835092	6.27255	37.7689	1.59394e-16	3.70426e-15
LOC114671959	1.20098	0.472367	-0.728613	1.95909	37.6744	1.73997e-16	4.04125e-15
LOC106993731	-1.01659	-0.116693	0.899893	6.31385	37.6719	1.74412e-16	4.04853e-15
SLC12A1	1.04919	1.28481	0.235621	1.66579	37.6542	1.77295e-16	4.11064e-15
RFLNA	0.508682	1.46083	0.952149	1.87005	37.6243	1.82284e-16	4.22382e-15
ZNF347	1.57751	1.02801	-0.549505	3.16724	37.5974	1.86893e-16	4.32557e-15
PITRM1	0.222658	-1.21932	-1.44198	4.26658	37.5733	1.91118e-16	4.42079e-15
NEPRO	1.27363	-0.137572	-1.4112	3.35808	37.5613	1.93258e-16	4.46768e-15
ITGA8	0.862158	1.06438	0.202225	1.93846	37.4818	2.08075e-16	4.79904e-15
DYNC2LI1	0.262952	-1.12606	-1.38901	4.92984	37.4524	2.13819e-16	4.92864e-15
ST6GAL1	0.1885	-1.49562	-1.68412	4.03826	37.4268	2.18965e-16	5.04433e-15
LOC107000647	1.44819	0.334527	-1.11366	4.60446	37.4233	2.19685e-16	5.05586e-15
LOC114670084	0.515692	-0.681184	-1.19688	0.785102	37.4228	2.19794e-16	5.05586e-15
LOC706647	0.925669	-0.465484	-1.39115	4.82764	37.365	2.31904e-16	5.31772e-15
MALT1	-0.409296	0.908701	1.318	5.46056	37.3213	2.41508e-16	5.53154e-15
DHX58	1.01012	-0.134987	-1.14511	1.40947	37.3012	2.46066e-16	5.63269e-15
MYO10	-0.666109	0.482091	1.1482	5.11113	37.2666	2.54091e-16	5.81302e-15
ANXA5	-1.23701	-1.48824	-0.25123	4.15069	37.2599	2.55695e-16	5.84635e-15
HSPB6	1.0582	0.949661	-0.108536	1.35015	37.2298	2.62945e-16	6.00174e-15
LETM1	1.03496	1.23681	0.201856	3.47299	37.2066	2.68659e-16	6.12864e-15
SAT2	1.20521	-0.072059	-1.27727	3.61892	37.1579	2.81109e-16	6.40528e-15
ANKRD40	0.507804	1.5419	1.0341	2.79246	37.1452	2.84431e-16	6.47725e-15
MAOB	1.50553	0.779636	-0.725893	3.79846	37.1373	2.86522e-16	6.52114e-15
POLR3H	1.08896	0.96729	-0.121669	1.71739	37.1273	2.892e-16	6.57831e-15
LOC106993001	0.651429	-0.450583	-1.10201	5.60059	37.1242	2.90028e-16	6.59337e-15
SMIM30	1.13132	0.64486	-0.486459	1.24344	37.1174	2.91879e-16	6.63164e-15
ZFYVE27	-0.23478	0.875452	1.11023	5.6918	37.0923	2.9875e-16	6.77998e-15
LOC114676976	-1.30819	0.205858	1.51405	4.96277	37.0825	3.01506e-16	6.83862e-15
LOC106998005	1.10073	0.319648	-0.781085	2.69786	37.0817	3.01713e-16	6.8394e-15
CXXC5	1.14485	0.517983	-0.626863	4.54616	37.0737	3.0397e-16	6.88664e-15
STEAP4	1.0265	0.749745	-0.276759	0.833188	37.0682	3.05518e-16	6.91775e-15
RPS27A	0.914619	-0.480975	-1.39559	2.33543	37.048	3.11318e-16	7.04104e-15
PPP1R10	1.30929	0.446813	-0.862481	3.64504	37.0214	3.19101e-16	7.21296e-15
TFB1M	0.906709	-0.782092	-1.6888	3.52248	36.9697	3.34832e-16	7.55561e-15
OVCH1	0.858673	1.25188	0.393207	1.06126	36.9686	3.35148e-16	7.55846e-15
BSDC1	0.205279	-1.09476	-1.30004	4.77444	36.9284	3.47924e-16	7.83768e-15
LAMA5	-0.224814	0.803162	1.02798	5.65692	36.9079	3.54606e-16	7.98366e-15
RHOBTB1	-1.37963	-0.0139691	1.36566	3.18268	36.8712	3.66907e-16	8.25393e-15
RNF144B	0.285289	1.20583	0.920545	2.79707	36.8661	3.68664e-16	8.28607e-15
INPP5J	0.452979	-1.00476	-1.45774	3.97598	36.8013	3.9154e-16	8.79026e-15
LOC100425035	-0.468532	-1.75858	-1.29005	2.97919	36.7814	3.98852e-16	8.94936e-15
EPB41L2	0.88128	-0.661219	-1.5425	5.02758	36.7798	3.99466e-16	8.95806e-15
LYPLAL1	1.21414	1.56342	0.349283	4.18175	36.7681	4.03841e-16	9.05106e-15
GPC5	0.507029	1.27566	0.768633	3.61646	36.7525	4.09739e-16	9.17287e-15
AMY2B	0.00474534	-1.03535	-1.0401	5.74696	36.7401	4.14492e-16	9.27406e-15
KCNC4	1.0218	0.656296	-0.365508	1.05395	36.7353	4.16315e-16	9.3096e-15
FNDC3B	0.829109	1.3676	0.538493	3.88506	36.7291	4.18756e-16	9.35891e-15
CD160	1.15	1.46296	0.312959	3.28513	36.7171	4.2345e-16	9.45848e-15
FSD2	0.825708	1.58489	0.75918	2.9154	36.6668	4.43719e-16	9.89178e-15
RASA4B	0.907169	1.20161	0.294441	3.56462	36.6665	4.43846e-16	9.89178e-15
LOC114673131	1.1294	-0.32524	-1.45464	3.51215	36.6413	4.54352e-16	1.01202e-14
HNRNPH1	0.13115	1.29743	1.16628	4.78845	36.58	4.81038e-16	1.06966e-14
PLAUR	0.611818	-0.54809	-1.15991	1.4182	36.5641	4.88186e-16	1.08495e-14
LOC106999049	-0.597311	-1.58972	-0.992412	1.82398	36.5491	4.95038e-16	1.09956e-14
LOC114670542	0.204711	-0.802068	-1.00678	0.599939	36.5405	4.99028e-16	1.1078e-14
AMZ1	1.27497	0.691841	-0.583128	2.82039	36.5264	5.05602e-16	1.12177e-14
PREX1	-0.657032	-1.58447	-0.927436	4.10253	36.5214	5.07989e-16	1.12644e-14
LOC114669950	-0.270329	-1.77212	-1.50179	3.85711	36.5131	5.11893e-16	1.13446e-14
CD80	1.19441	0.909794	-0.284611	1.61727	36.51	5.13387e-16	1.13713e-14
MAP1LC3A	0.247591	1.28129	1.0337	3.56378	36.4889	5.23539e-16	1.15897e-14
RPS28	1.22952	0.877235	-0.352282	3.45522	36.4859	5.25032e-16	1.16163e-14
LOC114670301	0.820222	-0.654034	-1.47426	2.50029	36.4799	5.27953e-16	1.16744e-14
FAM3C	1.04105	1.52723	0.486183	3.78405	36.4334	5.51288e-16	1.21768e-14
SCRG1	1.27687	1.16482	-0.112044	2.77009	36.4019	5.67708e-16	1.25325e-14
LINGO1	0.509367	1.23026	0.72089	6.23483	36.3613	5.89564e-16	1.29881e-14
HIKESHI	1.03408	-0.318873	-1.35295	3.53988	36.3521	5.94636e-16	1.30906e-14
PID1	1.03411	1.10014	0.0660215	6.33546	36.3338	6.04824e-16	1.33001e-14
DHRS13	0.623625	-0.834608	-1.45823	1.57389	36.305	6.21255e-16	1.36538e-14
LOC114673996	1.2464	-0.100442	-1.34684	2.45458	36.2885	6.30858e-16	1.38529e-14
ZNF605	0.157992	1.12981	0.97182	6.43287	36.2795	6.3615e-16	1.3958e-14
C3H7orf33	-1.20535	0.0560703	1.26143	3.3805	36.2332	6.64184e-16	1.4557e-14
RNASEH2B	1.05189	1.67125	0.619361	2.61406	36.2017	6.83966e-16	1.49823e-14
LOC106995352	0.786816	-0.277397	-1.06421	1.11751	36.1649	7.07785e-16	1.54955e-14
EPM2AIP1	1.37637	0.389654	-0.986712	4.01996	36.1592	7.11542e-16	1.55692e-14
STAT4	-1.10225	0.322939	1.42519	2.63566	36.0641	7.77408e-16	1.69916e-14
PRKCE	1.26886	1.53324	0.26438	3.20799	36.0551	7.8395e-16	1.71252e-14
LSM6	0.955093	-0.593986	-1.54908	2.42454	36.0448	7.9152e-16	1.7281e-14
TMEM241	1.22496	0.578666	-0.646297	4.13641	35.9358	8.76106e-16	1.90962e-14
LOC114678731	-1.44676	-1.39779	0.048966	4.19516	35.91	8.97364e-16	1.95488e-14
AP5Z1	-0.246849	1.13395	1.3808	3.54955	35.8898	9.1443e-16	1.99097e-14
CCDC181	0.543081	-1.07069	-1.61377	3.91023	35.8686	9.32655e-16	2.02954e-14
B4GALT1	1.10737	0.172399	-0.934969	1.86636	35.8602	9.39994e-16	2.04438e-14
C5H4orf50	1.23112	0.342235	-0.888881	5.01218	35.8518	9.4734e-16	2.05923e-14
DOCK5	0.366922	1.31969	0.952771	3.13379	35.8174	9.78207e-16	2.12516e-14
HEXB	0.273988	-1.19286	-1.46685	4.46569	35.7734	1.0191e-15	2.20917e-14
ZC3H4	1.13857	0.779307	-0.359263	3.41297	35.7684	1.02392e-15	2.21841e-14
CDRT1	1.24635	0.7953	-0.451045	2.52052	35.7475	1.044e-15	2.25944e-14
HOMER2	1.12919	0.410923	-0.71827	4.17414	35.7314	1.05978e-15	2.29234e-14
WBP4	-0.211638	-1.46809	-1.25645	4.27776	35.7237	1.06739e-15	2.30755e-14
IFT88	-0.00411094	-1.04376	-1.03965	6.03982	35.6741	1.11795e-15	2.41553e-14
AHR	0.0510532	-1.20869	-1.25974	1.1456	35.6632	1.12936e-15	2.43752e-14
LOC114678439	0.986749	1.73104	0.744294	2.47414	35.5582	1.24543e-15	2.68365e-14
ZNF883	1.24718	-0.273063	-1.52025	4.21704	35.5443	1.26166e-15	2.71715e-14
WASHC5	-0.398488	-1.29171	-0.893224	5.63935	35.5401	1.26657e-15	2.72626e-14
LOC706634	0.237144	1.27268	1.03553	1.4627	35.5176	1.2934e-15	2.7825e-14
LOC107000224	1.28585	0.990562	-0.295291	3.43459	35.4907	1.3263e-15	2.85172e-14
LOC706619	-1.23361	-0.0217974	1.21181	3.23464	35.4895	1.32773e-15	2.85325e-14
LOC106995316	1.00974	0.135704	-0.874038	6.89194	35.4734	1.34778e-15	2.8932e-14
SHROOM1	0.390979	1.46316	1.07218	2.03014	35.4486	1.37928e-15	2.95762e-14
SFXN4	0.556747	1.39543	0.83868	4.33246	35.4383	1.39263e-15	2.98464e-14
IQSEC2	1.1125	0.523657	-0.588841	4.79955	35.3657	1.49011e-15	3.18839e-14
PIK3R1	1.17359	1.34032	0.166731	4.52471	35.3456	1.51829e-15	3.24693e-14
NDUFS2	0.592746	-0.782442	-1.37519	5.68428	35.3365	1.53127e-15	3.27279e-14
NAALADL2	-1.24044	-0.643738	0.5967	5.59732	35.336	1.53203e-15	3.27279e-14
LOC106995947	-1.06313	-0.376557	0.686576	1.82805	35.2465	1.66531e-15	3.54987e-14
NAT16	-1.24653	-1.10729	0.139238	2.84728	35.2397	1.67598e-15	3.57068e-14
LOC106992549	0.900278	2.20498	1.30471	2.91796	35.2045	1.73182e-15	3.68371e-14
KLHL3	1.24529	0.970105	-0.275188	5.15845	35.1927	1.75096e-15	3.72244e-14
TTLL3	0.334208	-0.915604	-1.24981	4.61867	35.175	1.78008e-15	3.78029e-14
FAM174B	0.286349	-0.988271	-1.27462	1.36822	35.1644	1.79775e-15	3.81577e-14
ST8SIA4	-1.16585	-0.772959	0.392893	1.84224	35.1137	1.88482e-15	3.9963e-14
HSPA8	-0.0360442	1.53238	1.56842	5.16727	35.1071	1.89661e-15	4.01915e-14
FUOM	-0.582491	0.429419	1.01191	0.751477	35.0965	1.91543e-15	4.05686e-14
LOC711592	0.49048	-0.513432	-1.00391	2.25723	35.074	1.95604e-15	4.13846e-14
FLACC1	0.154472	-1.49225	-1.64672	4.49502	35.047	2.00593e-15	4.23949e-14
PRAG1	-0.451367	0.85392	1.30529	2.37684	35.0322	2.0338e-15	4.29381e-14
COL9A1	1.31156	1.20641	-0.105152	2.98416	35.015	2.06673e-15	4.35871e-14
LOC106997661	1.29133	1.48505	0.193719	3.30765	34.9808	2.13372e-15	4.49759e-14
OAZ1	1.10857	0.975519	-0.133051	4.55598	34.9496	2.19664e-15	4.62775e-14
DACH1	-1.24768	-0.988433	0.259249	2.74425	34.9448	2.20661e-15	4.64383e-14
BABAM1	1.24993	0.715563	-0.53437	4.23027	34.9414	2.21352e-15	4.65589e-14
LOC114670753	1.00272	-0.35212	-1.35484	1.58239	34.9231	2.2517e-15	4.73371e-14
SEC24D	-1.06063	0.088084	1.14871	1.53702	34.9123	2.27457e-15	4.77925e-14
RASD1	-0.67943	0.848812	1.52824	1.91513	34.8915	2.31902e-15	4.87005e-14
ERICH6	0.665855	-0.425055	-1.09091	1.13988	34.8902	2.3219e-15	4.87353e-14
MRPS21	1.02758	-0.387304	-1.41488	3.52281	34.8586	2.39144e-15	5.01419e-14
F10	1.20651	0.889847	-0.316662	2.72353	34.8417	2.42941e-15	5.0911e-14
LOC114676967	1.32244	0.254444	-1.068	3.75556	34.8396	2.43412e-15	5.09829e-14
MYO7A	0.867117	1.12959	0.262475	0.993267	34.795	2.53755e-15	5.31212e-14
FERMT2	0.467756	-0.982411	-1.45017	2.29349	34.7937	2.54075e-15	5.31601e-14
PIP4K2C	0.47185	-1.10009	-1.57194	2.62435	34.7916	2.54562e-15	5.32339e-14
ACADSB	0.878877	-0.448449	-1.32733	4.7947	34.7891	2.55165e-15	5.33319e-14
NPHP3	0.345302	-1.21841	-1.56371	3.79928	34.7781	2.57799e-15	5.38257e-14
WDR46	0.165096	-1.32189	-1.48699	2.43564	34.7345	2.68498e-15	5.60007e-14
SLC46A3	1.33307	1.02449	-0.308581	2.08321	34.6855	2.81079e-15	5.8563e-14
ELOVL6	-0.783059	0.372125	1.15518	5.6932	34.6557	2.89004e-15	6.01825e-14
LOC107000522	0.291922	1.33104	1.03912	1.61295	34.6516	2.90092e-15	6.03775e-14
ZNF664	1.15099	0.0957864	-1.0552	4.63583	34.6508	2.90311e-15	6.03914e-14
LOC114671713	-0.166503	-1.17921	-1.01271	1.12792	34.6393	2.93455e-15	6.10134e-14
BAG2	1.38444	0.762259	-0.622183	2.81533	34.5449	3.20495e-15	6.66006e-14
CRADD	1.00346	-0.366945	-1.3704	5.50793	34.5363	3.23084e-15	6.71034e-14
SBNO2	-0.087838	0.999455	1.08729	3.19819	34.5206	3.27844e-15	6.80564e-14
LOC106997434	0.881506	1.03761	0.156099	1.79704	34.4942	3.36029e-15	6.97189e-14
HIP1R	0.897325	-0.205079	-1.1024	3.85394	34.4448	3.51902e-15	7.29361e-14
CREB1	0.84316	1.14686	0.303704	5.44618	34.4417	3.5293e-15	7.31109e-14
CFAP69	-0.377294	-1.46033	-1.08304	4.79706	34.4175	3.60998e-15	7.47431e-14
LOC106997299	1.24425	0.141804	-1.10244	2.17193	34.3803	3.7374e-15	7.7341e-14
PHYHIP	-1.14716	0.0644374	1.2116	2.33123	34.3768	3.74974e-15	7.75559e-14
ESYT3	-0.789428	0.886163	1.67559	3.00321	34.3402	3.88024e-15	8.01715e-14
ZNF211	1.21184	1.0005	-0.211336	2.26245	34.3004	4.02723e-15	8.30355e-14
FAT1	0.312381	1.07212	0.759737	6.00219	34.2919	4.0592e-15	8.36511e-14
SEMA3B	-0.812385	0.421661	1.23405	1.06295	34.286	4.08161e-15	8.40693e-14
POLR3G	0.0635081	-1.04637	-1.10988	5.99008	34.2491	4.22475e-15	8.68822e-14
SMIM12	1.31195	1.23171	-0.0802414	2.49447	34.2399	4.26129e-15	8.75883e-14
GPATCH11	0.95218	-0.567418	-1.5196	3.44936	34.1792	4.50976e-15	9.25994e-14
ZFAND2A	1.03685	-0.319462	-1.35632	2.83331	34.1782	4.51422e-15	9.26431e-14
SNCG	1.04628	0.352188	-0.694093	5.48077	34.1443	4.65955e-15	9.54775e-14
BEX1	1.23574	0.797508	-0.438231	4.09353	34.1042	4.8375e-15	9.90725e-14
PPP2R5B	1.19325	0.822135	-0.371119	3.7295	34.099	4.86076e-15	9.94976e-14
LOC107000475	0.987379	-0.166471	-1.15385	1.24451	34.0909	4.89782e-15	1.00204e-13
STKLD1	0.56675	1.3412	0.774449	2.14624	34.0359	5.15593e-15	1.05322e-13
RSPO3	0.0171489	-1.46975	-1.4869	1.83509	34.0313	5.17817e-15	1.05722e-13
IFT43	0.414629	-0.734342	-1.14897	6.05756	34.0201	5.23287e-15	1.06784e-13
TNFRSF25	1.07082	0.612445	-0.458371	1.09758	33.9807	5.42924e-15	1.10677e-13
PARD6G	0.913587	1.38038	0.466793	3.0891	33.9689	5.48919e-15	1.11842e-13
NXF1	0.435229	1.14903	0.713802	6.26822	33.9556	5.5582e-15	1.13132e-13
LOC114677010	0.316796	-0.720713	-1.03751	0.637286	33.9234	5.7281e-15	1.1653e-13
LOC106998079	-0.431753	0.649103	1.08086	0.843299	33.9216	5.7376e-15	1.16664e-13
CYB561	0.115627	1.36679	1.25116	3.86059	33.8786	5.97271e-15	1.2132e-13
TXNRD3	0.910262	-0.724474	-1.63474	2.83703	33.8698	6.02203e-15	1.22259e-13
CCDC144NL	-0.167894	1.1127	1.2806	5.06914	33.8133	6.34868e-15	1.28693e-13
ELOA	1.27211	1.12149	-0.150622	3.45455	33.8076	6.38289e-15	1.29231e-13
CABP4	1.00045	0.432105	-0.568348	1.0474	33.8072	6.38502e-15	1.29231e-13
MAB21L3	0.709444	-0.659793	-1.36924	1.40264	33.7792	6.55445e-15	1.32526e-13
CRYAB	0.878175	1.62461	0.746434	2.54404	33.7708	6.60641e-15	1.33508e-13
NDUFAF1	0.921379	-0.43215	-1.35353	2.62365	33.7223	6.91267e-15	1.39555e-13
LOC700815	1.03548	0.196839	-0.838645	1.25576	33.706	7.01924e-15	1.41562e-13
P3H3	0.300837	1.55619	1.25535	3.19365	33.6868	7.14605e-15	1.43827e-13
FAM71D	1.25581	0.80814	-0.447671	2.08629	33.6757	7.22058e-15	1.45254e-13
PIR	1.10855	0.0987106	-1.00984	5.25625	33.6443	7.43592e-15	1.49283e-13
UBAP1L	0.698529	1.24841	0.549879	5.0295	33.5721	7.95542e-15	1.5939e-13
RBFOX3	1.0577	0.748794	-0.308906	2.35572	33.5652	8.0071e-15	1.60344e-13
SLC25A11	1.20077	1.26497	0.0641928	2.15638	33.5482	8.13526e-15	1.62694e-13
CLCN6	0.60031	-0.468759	-1.06907	5.27893	33.5252	8.31211e-15	1.66117e-13
LOC100427676	0.347933	1.12734	0.77941	0.7845	33.5187	8.3632e-15	1.67053e-13
LOC100430938	0.202172	1.39992	1.19774	2.48364	33.5145	8.39605e-15	1.67625e-13
LOC114672857	-0.423501	0.660199	1.0837	1.51536	33.4932	8.565e-15	1.70912e-13
PRPF38A	0.366638	-1.19997	-1.56661	2.01842	33.4535	8.88912e-15	1.77113e-13
TUBA4A	1.3204	0.893256	-0.427149	3.06668	33.3966	9.37513e-15	1.86422e-13
LOC114669724	0.372461	1.20428	0.831817	2.1242	33.3904	9.43017e-15	1.87422e-13
SH3BP5	1.12663	0.320567	-0.806059	4.59652	33.38	9.5223e-15	1.89159e-13
SPAG5	1.28032	1.22994	-0.0503796	3.76081	33.376	9.55751e-15	1.89763e-13
DDX4	0.554405	-0.728125	-1.28253	1.85712	33.3694	9.61659e-15	1.9078e-13
LOC106997633	-1.26346	-0.118409	1.14505	4.33292	33.3692	9.61836e-15	1.9078e-13
LOC114674158	0.868151	1.11123	0.243078	1.45102	33.3597	9.70448e-15	1.92392e-13
SPEF2	1.02985	1.09353	0.0636834	1.944	33.2841	1.04165e-14	2.0589e-13
STAMBPL1	1.36493	1.07881	-0.286127	3.63684	33.2812	1.04446e-14	2.06344e-13
EFEMP2	0.224458	1.52373	1.29927	3.43334	33.2396	1.08593e-14	2.14429e-13
EHD3	1.34892	0.91028	-0.438643	3.38063	33.2295	1.09622e-14	2.16354e-13
LOC114673814	-0.550264	-1.342	-0.791731	5.15629	33.2249	1.10099e-14	2.17187e-13
DYNLL2	0.991819	1.22331	0.231494	3.75926	33.1939	1.13336e-14	2.23461e-13
RASGEF1A	-0.64673	0.704473	1.3512	1.33205	33.1555	1.17489e-14	2.31534e-13
DMRTC1B	1.16211	-0.195997	-1.3581	3.13727	33.1491	1.18192e-14	2.32803e-13
B3GAT1	0.42088	1.52941	1.10853	3.75919	33.1411	1.19082e-14	2.34441e-13
NBDY	-0.690947	0.675328	1.36628	5.21229	33.1046	1.23226e-14	2.42239e-13
RPL23	0.813548	-0.716466	-1.53001	2.96169	33.0758	1.26594e-14	2.48737e-13
LOC114679975	-1.15375	-0.267942	0.88581	2.99345	33.0647	1.27913e-14	2.51204e-13
ACAP3	0.368773	1.26129	0.892514	4.31155	33.0029	1.35532e-14	2.65509e-13
LOC114671738	0.924783	-0.506779	-1.43156	2.46667	32.9981	1.36145e-14	2.66577e-13
TMEM106C	-0.205876	1.38856	1.59444	3.24437	32.9784	1.38683e-14	2.71413e-13
PDP1	1.22454	0.311707	-0.912838	3.98412	32.9622	1.40797e-14	2.75414e-13
LOC114672407	1.02759	1.08192	0.0543358	1.47365	32.9466	1.42867e-14	2.79188e-13
LOC100430065	0.609964	-0.638437	-1.2484	5.17235	32.9118	1.4761e-14	2.88174e-13
MOK	1.06838	0.373238	-0.695143	4.69185	32.893	1.50223e-14	2.92988e-13
BRI3BP	-1.02251	0.0895732	1.11209	3.26272	32.8605	1.5487e-14	3.01753e-13
ATP5F1D	0.818987	1.37279	0.553801	2.98917	32.8529	1.55983e-14	3.03772e-13
FRK	1.40178	0.992416	-0.409367	4.87018	32.8258	1.59991e-14	3.11424e-13
CRLF3	0.170663	1.18686	1.01619	4.05207	32.7985	1.64132e-14	3.19329e-13
LOC106994512	0.856261	-0.174878	-1.03114	0.982248	32.7978	1.64241e-14	3.19384e-13
DUSP11	1.0346	0.232833	-0.801763	5.34165	32.7946	1.64736e-14	3.20189e-13
MYOM1	1.12267	0.856492	-0.266179	2.61732	32.7848	1.66247e-14	3.22969e-13
CPSF3	-0.217344	-1.22031	-1.00297	5.14471	32.78	1.67003e-14	3.24278e-13
LOC719711	0.476545	1.02284	0.546293	0.667893	32.7756	1.67697e-14	3.25307e-13
C1H1orf35	0.367866	1.46019	1.09233	4.12973	32.7708	1.68453e-14	3.26614e-13
ANKRD34B	-0.0822285	1.36688	1.44911	2.48501	32.7187	1.76877e-14	3.42445e-13
ZNF274	0.275869	-1.11667	-1.39254	2.02743	32.686	1.82386e-14	3.5294e-13
LOC707227	0.442648	-0.927511	-1.37016	3.7483	32.6198	1.94057e-14	3.7461e-13
CDS2	0.358558	-0.908278	-1.26684	4.82867	32.5692	2.03481e-14	3.92039e-13
GALNT16	0.554267	1.48792	0.933651	4.14138	32.5659	2.04103e-14	3.93047e-13
CCND3	-0.6778	0.360282	1.03808	4.00256	32.5131	2.14471e-14	4.12612e-13
GSTK1	0.969994	1.23016	0.260167	5.01002	32.4316	2.31494e-14	4.44931e-13
PGBD1	0.946853	-0.450681	-1.39753	4.06677	32.4293	2.31981e-14	4.4565e-13
ARMCX5	0.805775	-0.647971	-1.45375	2.24831	32.3898	2.40736e-14	4.62021e-13
LOC100423190	1.0034	1.33817	0.33477	5.47895	32.3564	2.48406e-14	4.76051e-13
CYP2C18	0.340576	1.16417	0.82359	0.972132	32.3521	2.49392e-14	4.7771e-13
WDR62	0.708312	1.19535	0.48704	3.51382	32.3294	2.54761e-14	4.87523e-13
SEMA6A	-1.19796	0.0234187	1.22138	5.34407	32.3231	2.56267e-14	4.90169e-13
LOC106994879	1.12906	0.888762	-0.240294	1.73751	32.3146	2.58325e-14	4.93867e-13
TFEB	0.623094	1.46189	0.838798	2.13849	32.3024	2.61309e-14	4.99332e-13
SYS1	1.16477	1.3217	0.156923	2.86486	32.2637	2.70962e-14	5.17529e-13
PHYHD1	0.297523	-0.761886	-1.05941	1.39894	32.2582	2.72358e-14	5.19944e-13
KCNJ16	0.691686	1.12053	0.428846	1.43779	32.2014	2.87266e-14	5.47613e-13
SPAG1	1.13782	1.16338	0.0255611	3.32007	32.1746	2.94565e-14	5.61257e-13
SLC9A2	1.15447	0.138585	-1.01589	2.16726	32.1444	3.03047e-14	5.76588e-13
TAF1D	-0.659816	-1.14331	-0.483492	5.33874	32.1365	3.05294e-14	5.80029e-13
EXOC5	1.05271	0.505447	-0.547259	5.36669	32.1314	3.06761e-14	5.82537e-13
RPL18A	1.08436	1.33182	0.247455	2.84587	32.0771	3.22784e-14	6.12086e-13
NUDT22	0.161967	-1.29277	-1.45473	2.86292	32.0662	3.26116e-14	6.1811e-13
ECT2L	0.599642	-0.613778	-1.21342	4.97184	32.0515	3.3065e-14	6.26403e-13
LOC114671291	0.735809	1.31772	0.58191	1.35443	32.0475	3.31869e-14	6.28413e-13
GLB1L2	1.01617	-0.404911	-1.42108	2.08699	32.0071	3.44691e-14	6.51758e-13
LOC114676966	0.849147	-0.531624	-1.38077	2.02729	32.002	3.46364e-14	6.5461e-13
NABP1	-0.41038	0.855455	1.26583	1.06962	31.987	3.51263e-14	6.63552e-13
TAF11	-0.00244257	1.29237	1.29482	3.38363	31.9397	3.67203e-14	6.92674e-13
NPL	-0.554045	0.942019	1.49606	4.25135	31.9225	3.7318e-14	7.03615e-13
LOC106993383	1.2225	1.08574	-0.136759	2.35746	31.8931	3.83607e-14	7.22243e-13
IMPA1	0.210855	-1.11401	-1.32486	4.23183	31.892	3.84006e-14	7.22653e-13
NDUFAF7	0.287748	-1.20212	-1.48987	4.65763	31.8874	3.85695e-14	7.24799e-13
PLXNB1	-1.233	0.00377981	1.23678	2.27062	31.8793	3.88633e-14	7.29714e-13
ELL	-0.17279	0.991059	1.16385	4.65889	31.8736	3.90721e-14	7.33203e-13
CEP76	0.715174	1.34785	0.63268	2.63193	31.8616	3.95131e-14	7.41127e-13
FAM20A	0.190501	1.5503	1.3598	4.03494	31.8498	3.99514e-14	7.48995e-13
ANKRD44	0.730406	-0.536141	-1.26655	5.21392	31.7867	4.23929e-14	7.94016e-13
LOC703224	0.719204	1.24309	0.523885	1.58617	31.7617	4.33957e-14	8.12032e-13
RGS12	0.766366	1.46482	0.698453	4.13747	31.7591	4.35031e-14	8.13658e-13
ALDH2	-0.310768	1.06214	1.37291	2.81571	31.7528	4.37603e-14	8.17698e-13
STIP1	1.07943	0.946352	-0.133081	3.84482	31.7469	4.40038e-14	8.2186e-13
CD72	0.896994	1.2836	0.386604	2.19986	31.7404	4.42755e-14	8.26157e-13
LOC107000717	1.33393	0.85872	-0.475211	2.47718	31.7293	4.47389e-14	8.34412e-13
NR1D1	1.13752	0.969119	-0.168397	1.90573	31.7209	4.50937e-14	8.40633e-13
UTP18	-0.337352	-1.46421	-1.12686	3.6635	31.6622	4.7645e-14	8.86528e-13
LRFN4	0.981104	1.20394	0.222839	2.34663	31.6609	4.77065e-14	8.8684e-13
FAR1	0.759276	-0.441747	-1.20102	5.63707	31.6589	4.7796e-14	8.88088e-13
LOC114670971	-1.09639	-0.56154	0.534848	1.97552	31.6307	4.90768e-14	9.1146e-13
PRTFDC1	1.13147	0.00561977	-1.12585	3.81791	31.6116	4.99672e-14	9.27562e-13
TP53INP1	1.15814	-0.230163	-1.3883	2.84679	31.6054	5.02561e-14	9.32487e-13
LOC100430695	-0.682048	0.725156	1.4072	3.18936	31.5861	5.11783e-14	9.48712e-13
C11H12orf56	0.871716	1.06568	0.193965	2.55882	31.5767	5.16292e-14	9.56623e-13
LOC114679637	-0.996313	-1.46927	-0.472962	4.31233	31.5729	5.18145e-14	9.5916e-13
CAMKK1	0.791676	-0.460343	-1.25202	4.63769	31.5347	5.37073e-14	9.93735e-13
RABL2B	-0.324202	1.01964	1.34384	3.57897	31.5141	5.47587e-14	1.0113e-12
LOC693611	0.548382	-0.698188	-1.24657	5.54758	31.5078	5.50802e-14	1.01677e-12
CHD1L	-1.14985	-0.715599	0.434249	5.03071	31.5071	5.51185e-14	1.017e-12
INHA	1.02448	0.0109635	-1.01351	1.8623	31.4879	5.61196e-14	1.03499e-12
LOC699417	1.19199	0.737438	-0.45455	2.85108	31.4511	5.80925e-14	1.06988e-12
C15H9orf16	1.095	0.348664	-0.746331	1.89357	31.442	5.85941e-14	1.07762e-12
LOC106998550	0.827023	-0.770415	-1.59744	2.30942	31.4413	5.86319e-14	1.07782e-12
ACSL1	0.781245	1.08301	0.301768	5.3162	31.4211	5.97546e-14	1.09744e-12
ACTA2	1.15228	1.08052	-0.0717594	1.71289	31.4058	6.06173e-14	1.11277e-12
GALE	-0.379732	1.1827	1.56243	3.34435	31.3705	6.26663e-14	1.14772e-12
PLEKHD1	-0.324673	-1.25826	-0.933584	5.43022	31.3573	6.34445e-14	1.16144e-12
ANKMY1	1.02993	-0.327663	-1.35759	3.13308	31.3208	6.56581e-14	1.20141e-12
ST5	1.10954	0.0610789	-1.04846	3.63594	31.3202	6.56981e-14	1.20159e-12
LOC106997597	1.29931	0.930309	-0.369005	2.25038	31.2907	6.7542e-14	1.23417e-12
CRPPA	0.985221	-0.125509	-1.11073	5.86191	31.2275	7.16749e-14	1.30849e-12
SERPINA6	1.17474	0.0796273	-1.09512	1.78889	31.2112	7.27781e-14	1.32741e-12
ZSWIM5	0.477422	-0.545048	-1.02247	6.45331	31.174	7.53713e-14	1.37281e-12
LOC714265	0.0753967	1.38442	1.30902	3.70374	31.1265	7.88111e-14	1.43349e-12
TNFRSF19	0.362363	-0.936073	-1.29844	1.48983	31.1221	7.91351e-14	1.43872e-12
RGS3	0.38791	-1.1021	-1.49001	4.07543	31.0455	8.50495e-14	1.54342e-12
KIRREL3	0.785741	-0.830524	-1.61627	2.96924	31.0263	8.65925e-14	1.56998e-12
NDUFA11	0.326604	1.33821	1.01161	3.6157	31.0226	8.68997e-14	1.57483e-12
POLR1B	0.386347	-1.01429	-1.40063	3.9609	31.0063	8.82429e-14	1.59772e-12
GAA	1.02167	1.14837	0.126709	3.54372	30.9782	9.0599e-14	1.63963e-12
LOC698288	-1.29533	-0.116353	1.17898	2.97106	30.9702	9.1282e-14	1.65124e-12
LOC106992548	0.69309	1.57342	0.880332	3.30622	30.9599	9.21721e-14	1.66657e-12
ZNF233	1.316	0.710794	-0.605203	3.299	30.9225	9.54751e-14	1.72473e-12
SLC30A6	0.508349	-0.692599	-1.20095	3.77527	30.9153	9.61249e-14	1.73567e-12
MMACHC	0.904891	1.06712	0.162227	1.36479	30.9068	9.68964e-14	1.74722e-12
DIMT1	1.2767	0.908112	-0.368587	3.12781	30.8842	9.89722e-14	1.78384e-12
LOC114673956	0.705606	1.08886	0.383256	1.12514	30.8748	9.98473e-14	1.79879e-12
IARS2	0.435465	-0.885611	-1.32108	3.94206	30.8228	1.04854e-13	1.88729e-12
MMP28	0.579263	-0.781095	-1.36036	2.29038	30.7862	1.08529e-13	1.95166e-12
LOC712126	0.653827	1.05278	0.398949	1.1098	30.7847	1.08682e-13	1.95352e-12
PGRMC1	-0.210014	-1.33763	-1.12762	1.27078	30.7743	1.09751e-13	1.97005e-12
IMMP1L	1.00302	0.710339	-0.292678	5.18584	30.7586	1.11377e-13	1.99834e-12
LOC114679516	0.708747	-0.608842	-1.31759	4.36781	30.72	1.15501e-13	2.06672e-12
LOC114671961	-0.0536926	-1.11064	-1.05694	1.28546	30.6958	1.18158e-13	2.11236e-12
TMEM164	-0.54737	0.544578	1.09195	6.25384	30.6758	1.204e-13	2.14953e-12
LOC100427218	0.556777	1.26032	0.703539	1.87545	30.6433	1.24148e-13	2.21048e-12
LRRC39	1.02178	-0.0481792	-1.06996	4.37871	30.622	1.26651e-13	2.25303e-12
SLF1	0.631917	-0.416498	-1.04841	5.43039	30.6069	1.28469e-13	2.28434e-12
FZD6	-0.508105	-1.61095	-1.10284	4.49203	30.6023	1.29019e-13	2.2929e-12
BAALC	-1.08865	-0.459296	0.629354	5.41363	30.602	1.29066e-13	2.2929e-12
ISOC1	0.893528	1.16205	0.268523	1.21199	30.5684	1.33206e-13	2.36327e-12
LOC716974	0.23299	-1.13341	-1.3664	3.48372	30.5643	1.33725e-13	2.37142e-12
STK3	-0.562108	-1.00991	-0.447802	6.22125	30.5569	1.34652e-13	2.3868e-12
ARHGEF33	1.03144	0.0882586	-0.94318	4.48239	30.5298	1.38137e-13	2.44638e-12
LOC106999407	1.02541	-0.224251	-1.24966	1.73183	30.4458	1.49492e-13	2.64159e-12
ELFN2	0.0937646	1.00994	0.916179	5.45822	30.4055	1.55274e-13	2.73766e-12
LOC722074	0.38628	-1.07163	-1.45791	2.03236	30.3901	1.57544e-13	2.77521e-12
LOC106999933	0.844258	-0.766776	-1.61103	2.52571	30.3811	1.58886e-13	2.79637e-12
LOC114679375	-0.180626	-1.11993	-0.939302	0.948338	30.3803	1.58994e-13	2.79703e-12
TMEM51	1.08928	1.27916	0.189888	2.21841	30.347	1.64058e-13	2.88228e-12
MRPL3	1.14846	1.04591	-0.10255	4.43636	30.3241	1.67635e-13	2.94381e-12
DBF4B	0.598991	-0.661195	-1.26019	2.54548	30.3193	1.68393e-13	2.95582e-12
CD83	0.960458	1.36934	0.40888	1.98832	30.314	1.69245e-13	2.96946e-12
LOC114673438	1.08054	1.12944	0.0489074	1.76166	30.2654	1.77163e-13	3.10289e-12
RPS6KL1	0.31986	-0.838243	-1.1581	5.24493	30.2624	1.77662e-13	3.10957e-12
DNAAF5	-1.17337	-0.596542	0.576828	3.73399	30.2622	1.77701e-13	3.10957e-12
STMN4	0.622093	-0.879903	-1.502	2.95228	30.2459	1.80447e-13	3.15485e-12
CTBP1	0.0644741	1.12632	1.06184	4.32058	30.2229	1.84394e-13	3.22243e-12
IGIP	1.1437	0.862729	-0.280973	2.44662	30.2075	1.87091e-13	3.26812e-12
ALPK3	0.593061	-0.940261	-1.53332	3.88447	30.189	1.90372e-13	3.32397e-12
ZNF365	1.19014	0.0166268	-1.17351	3.55282	30.146	1.98244e-13	3.45381e-12
CD6	-0.460049	0.978726	1.43878	2.11526	30.134	2.00495e-13	3.48996e-12
UCN	0.984615	-0.0818579	-1.06647	1.79888	30.1291	2.01433e-13	3.50476e-12
MLH3	0.568879	-0.786412	-1.35529	4.39188	30.1285	2.01529e-13	3.50489e-12
LOC705933	0.558492	1.30837	0.749875	1.46168	30.1163	2.03865e-13	3.54396e-12
BBS7	0.0751501	-1.04052	-1.11567	4.95622	30.0962	2.07758e-13	3.60532e-12
TBC1D2	-0.193533	-1.37306	-1.17953	4.47166	30.0694	2.1308e-13	3.69607e-12
LOC114678729	0.93586	-0.315353	-1.25121	2.70603	30.0343	2.20242e-13	3.81695e-12
ADGRG2	0.110095	-1.25371	-1.3638	3.28558	30.0197	2.23283e-13	3.86627e-12
GLUL	1.03301	1.05167	0.018667	1.42026	30.0152	2.24233e-13	3.88103e-12
CDK2AP1	0.979347	1.27415	0.294802	1.99561	29.9777	2.32302e-13	4.01543e-12
MFSD6	1.14856	0.60544	-0.543117	4.24812	29.9569	2.36893e-13	4.09123e-12
LOC106995355	1.00503	-0.790954	-1.79598	3.97235	29.942	2.40243e-13	4.14728e-12
ZMIZ1	0.994273	1.05836	0.0640866	1.83089	29.9409	2.40481e-13	4.14957e-12
CTNND1	-0.221658	0.786809	1.00847	5.45346	29.935	2.41834e-13	4.1693e-12
DTWD2	1.10213	0.237704	-0.864427	4.62074	29.9298	2.43028e-13	4.18806e-12
PJVK	1.27455	0.201603	-1.07295	3.41771	29.9017	2.49541e-13	4.29657e-12
FAT2	0.227404	-1.29136	-1.51876	4.5258	29.8619	2.59059e-13	4.45465e-12
IFI6	1.29452	0.746096	-0.548425	3.7429	29.8373	2.65146e-13	4.55339e-12
LOC106993394	-0.827939	-1.4574	-0.629459	3.22844	29.8368	2.65272e-13	4.55358e-12
UBE2QL1	0.985409	1.05878	0.073369	5.10504	29.8069	2.72845e-13	4.68155e-12
LOC114671347	0.685095	-0.556129	-1.24122	1.537	29.7213	2.95762e-13	5.0682e-12
MED4	-1.13883	0.0517539	1.19058	2.87131	29.7031	3.00883e-13	5.15328e-12
LOC100423136	0.0506671	-0.960472	-1.01114	1.7503	29.7028	3.00987e-13	5.15328e-12
TCAF2	0.689949	1.61237	0.922424	3.36666	29.6879	3.05219e-13	5.22123e-12
LOC106992637	0.244824	-0.912795	-1.15762	0.998732	29.6789	3.07845e-13	5.26388e-12
C1QTNF2	1.06	1.09432	0.0343153	3.36017	29.6713	3.10032e-13	5.299e-12
2021-03-02	1.16445	0.692304	-0.47215	2.09258	29.6215	3.24941e-13	5.55142e-12
ZMYND12	1.03857	1.34597	0.307395	2.22796	29.6063	3.29627e-13	5.62905e-12
RPS11	1.16228	0.436597	-0.725683	2.43748	29.5686	3.41561e-13	5.83034e-12
THEM4	0.973481	-0.260672	-1.23415	2.79098	29.5366	3.52029e-13	5.99613e-12
MOB1B	-1.01306	-0.354284	0.658773	1.81607	29.5253	3.55776e-13	6.05736e-12
TMEM206	0.400905	1.44616	1.04526	2.29709	29.5095	3.61127e-13	6.14299e-12
LOC106998839	-0.109022	-1.53437	-1.42534	2.06237	29.5091	3.6127e-13	6.14299e-12
LOC106994907	0.857769	1.53224	0.674476	2.33096	29.5046	3.62799e-13	6.16369e-12
LOC106999495	1.31109	0.566092	-0.744995	3.55373	29.4734	3.7362e-13	6.3421e-12
UFM1	0.498124	1.63889	1.14077	3.20437	29.4648	3.76662e-13	6.38827e-12
LOC114670366	-0.267908	-1.11378	-0.845874	1.22533	29.4443	3.84035e-13	6.50498e-12
LOC107000227	0.851062	1.28505	0.433989	1.92807	29.4399	3.85639e-13	6.52936e-12
IKBKB	1.06126	0.960683	-0.100578	4.36109	29.4283	3.89879e-13	6.59834e-12
CCDC125	0.793191	-0.307153	-1.10034	3.31718	29.4216	3.92323e-13	6.63687e-12
ZNF770	1.19786	0.594708	-0.60315	2.16456	29.3894	4.04428e-13	6.83e-12
DBT	0.853782	-0.193775	-1.04756	4.95381	29.3874	4.05182e-13	6.83982e-12
SMPD4	1.06135	0.424483	-0.636869	4.96602	29.362	4.15018e-13	7.00285e-12
FOXP2	0.596423	-1.42197	-2.0184	6.07045	29.3616	4.15193e-13	7.00285e-12
CFAP36	0.994552	-0.0882826	-1.08283	4.4573	29.3458	4.21425e-13	7.10495e-12
TSHZ1	1.28619	0.829244	-0.456941	3.89716	29.3398	4.23784e-13	7.13865e-12
FTL	0.596952	-0.568709	-1.16566	3.60064	29.3353	4.25624e-13	7.16659e-12
ICA1L	0.210426	-0.808502	-1.01893	5.77544	29.3346	4.25901e-13	7.16821e-12
LOC106998872	0.983137	1.12378	0.140648	3.12408	29.3283	4.28406e-13	7.20733e-12
IMMT	0.313151	-0.751635	-1.06479	5.29716	29.3256	4.29531e-13	7.22013e-12
LOC114679528	0.929729	1.1417	0.211972	1.33057	29.306	4.37518e-13	7.34815e-12
ZFX	0.45175	1.21703	0.76528	5.00563	29.252	4.60373e-13	7.72629e-12
LOC107000952	-1.01967	0.204553	1.22422	1.4887	29.2382	4.66448e-13	7.82079e-12
SMYD2	1.14433	0.123536	-1.02079	4.75881	29.1885	4.88815e-13	8.18543e-12
ZDHHC22	-0.927377	0.344922	1.2723	2.76969	29.1845	4.90686e-13	8.20636e-12
COPS6	0.742826	-0.471861	-1.21469	5.19881	29.174	4.95538e-13	8.28054e-12
CSRNP3	0.410285	1.0493	0.639015	6.35292	29.1676	4.98563e-13	8.32757e-12
RARRES1	1.03935	1.29373	0.254378	3.81019	29.1614	5.01455e-13	8.37236e-12
FMNL3	-0.217124	1.14549	1.36261	2.84937	29.1603	5.01988e-13	8.37774e-12
RNF165	1.27333	0.491833	-0.781499	3.35636	29.1256	5.18687e-13	8.65278e-12
TMEM243	0.898255	-0.252463	-1.15072	1.49523	29.1212	5.20841e-13	8.68506e-12
KBTBD11	0.895856	1.47119	0.575333	2.55688	29.12	5.21441e-13	8.69141e-12
GAB2	0.271525	1.02158	0.750058	6.68545	29.1076	5.27593e-13	8.79026e-12
NNAT	0.555892	1.17348	0.617592	1.5779	29.0539	5.55002e-13	9.23916e-12
DPCD	0.928376	-0.456682	-1.38506	3.624	29.0057	5.80816e-13	9.65269e-12
LOC106997683	1.02792	1.04244	0.0145131	1.57544	28.983	5.93408e-13	9.8537e-12
RECQL	0.441337	-1.04276	-1.48409	3.64103	28.9042	6.39261e-13	1.06018e-11
MXRA7	-1.14564	-0.536261	0.609375	4.36756	28.9037	6.39528e-13	1.06018e-11
CHMP5	1.22143	0.951945	-0.269486	3.64695	28.8902	6.47759e-13	1.07293e-11
UTP23	1.21189	1.23518	0.0232978	2.91965	28.887	6.49676e-13	1.07565e-11
LOC114670434	0.584862	1.15314	0.568281	1.26742	28.8676	6.61723e-13	1.09514e-11
TMEM222	1.17589	0.944774	-0.231116	2.67497	28.8494	6.73197e-13	1.11274e-11
LOC106998993	-0.182308	1.33827	1.52058	3.23224	28.8435	6.76906e-13	1.1184e-11
LOC114677726	0.694116	1.07029	0.376175	0.896427	28.8356	6.81992e-13	1.12634e-11
PNPLA6	-0.294262	0.926183	1.22045	4.42061	28.8342	6.82914e-13	1.12739e-11
POGK	-0.717544	0.758056	1.4756	2.58582	28.7832	7.16579e-13	1.17953e-11
CHURC1	1.27153	0.830805	-0.440729	2.63216	28.7674	7.27354e-13	1.19627e-11
ZNF438	0.240167	-1.0775	-1.31766	5.20135	28.7556	7.3554e-13	1.20874e-11
UBLCP1	1.15005	0.713156	-0.436892	1.80872	28.727	7.5568e-13	1.2408e-11
C2H3orf20	0.847763	-0.333204	-1.18097	4.31834	28.7201	7.60608e-13	1.24838e-11
SLC26A7	-0.70835	0.452187	1.16054	1.2581	28.7021	7.73599e-13	1.26865e-11
ZNF595	1.17056	0.748377	-0.422186	3.64422	28.6954	7.7855e-13	1.27624e-11
SLC3A1	1.13125	0.958184	-0.173062	3.23839	28.6679	7.99041e-13	1.30821e-11
GASK1A	1.27225	0.320004	-0.952242	2.32268	28.6502	8.12482e-13	1.32967e-11
MGAT4C	0.0114916	1.40798	1.39649	3.64145	28.6392	8.20952e-13	1.34298e-11
HRK	0.0255218	-1.28918	-1.31471	2.15343	28.6361	8.23396e-13	1.34642e-11
NT5C3A	0.861197	-0.258793	-1.11999	4.44174	28.6054	8.47587e-13	1.3854e-11
OXA1L	0.149228	-1.33704	-1.48627	3.49987	28.5777	8.70087e-13	1.42043e-11
CAPNS1	0.0479826	1.01528	0.967297	4.85991	28.5232	9.16031e-13	1.49481e-11
LOC106997882	0.848273	-0.453569	-1.30184	2.0017	28.4688	9.64364e-13	1.57175e-11
CDKL2	-0.128958	-1.29886	-1.1699	3.41658	28.4658	9.67122e-13	1.57495e-11
LIPE	0.687713	1.29898	0.611269	4.40888	28.4652	9.67612e-13	1.5751e-11
LOC114670363	0.340036	1.46161	1.12158	1.97807	28.4501	9.81561e-13	1.5965e-11
GMFB	0.999158	1.16871	0.169555	1.69786	28.4374	9.93405e-13	1.6151e-11
CCDC159	0.978255	-0.0835224	-1.06178	2.52724	28.4263	1.00381e-12	1.63068e-11
ZNF334	1.34669	0.52851	-0.818178	3.83428	28.4001	1.02906e-12	1.67101e-11
RBCK1	0.321585	1.05454	0.732952	5.2316	28.353	1.07588e-12	1.74561e-11
FAM210A	0.661756	-0.703355	-1.36511	4.28782	28.3476	1.08138e-12	1.75381e-11
B3GNT5	0.186706	-1.16117	-1.34788	2.22798	28.3458	1.08322e-12	1.75607e-11
TRAPPC12	1.06816	0.656052	-0.412111	4.9271	28.3442	1.08482e-12	1.75795e-11
LOC106993549	0.36065	1.12319	0.762538	0.859703	28.2432	1.19342e-12	1.93158e-11
LOC114673827	1.04391	0.0731268	-0.970779	2.80445	28.2287	1.20994e-12	1.95751e-11
OVCA2	0.48421	-0.629968	-1.11418	3.79628	28.2266	1.21235e-12	1.96062e-11
PSMG2	0.836244	-0.418421	-1.25466	3.17724	28.2191	1.22092e-12	1.97368e-11
LIMS1	-0.743577	-1.05401	-0.310428	2.31323	28.2027	1.24007e-12	2.003e-11
IL12RB2	1.14784	1.05719	-0.0906474	3.00235	28.2021	1.24074e-12	2.00327e-11
CREB3L3	0.301076	-0.745329	-1.04641	1.9248	28.2008	1.24227e-12	2.00491e-11
LOC100423769	1.11527	0.545134	-0.570141	1.45145	28.1938	1.25054e-12	2.01745e-11
GPR161	-0.898621	0.440398	1.33902	3.2915	28.1858	1.26005e-12	2.03113e-11
DNAJB1	0.802231	1.19371	0.391482	2.02555	28.1795	1.26758e-12	2.04161e-11
TRAPPC1	1.10433	0.860988	-0.243338	2.84333	28.1643	1.28594e-12	2.07035e-11
NECAB1	1.00342	1.03986	0.0364427	2.14513	28.1552	1.297e-12	2.08645e-11
LOC114670020	0.508934	1.08399	0.575053	0.955289	28.1493	1.30423e-12	2.09724e-11
PSMD13	1.03174	0.0778379	-0.953899	4.30888	28.0887	1.38109e-12	2.21813e-11
JOSD1	1.02414	0.905911	-0.118228	4.09393	28.0822	1.38973e-12	2.2311e-11
FER1L6	-0.126646	-1.0918	-0.965151	2.02456	28.0793	1.39345e-12	2.23617e-11
ERAL1	1.24278	1.08867	-0.154116	2.71308	28.0381	1.44886e-12	2.32134e-11
MCM8	0.501922	-0.718182	-1.2201	1.74531	28.0298	1.46031e-12	2.33864e-11
CEMIP	-0.625164	-1.52651	-0.901348	1.9882	28.0294	1.46084e-12	2.33864e-11
MAPK13	0.62184	-0.592954	-1.21479	1.34237	28.0275	1.46347e-12	2.3419e-11
MRFAP1L1	1.02135	1.13043	0.109082	1.76892	28.0205	1.47319e-12	2.35651e-11
LOC114677362	0.76681	1.59224	0.825429	3.39034	28.0044	1.49573e-12	2.39063e-11
CPOX	0.856242	-0.521241	-1.37748	3.26242	27.9907	1.5153e-12	2.41899e-11
TMEM191C	-1.15911	-0.611329	0.547783	2.46256	27.938	1.59271e-12	2.5395e-11
TPRG1L	1.10878	1.07975	-0.0290361	2.57881	27.9185	1.62225e-12	2.58556e-11
LOC114672406	-0.506416	0.575856	1.08227	1.07801	27.9125	1.6316e-12	2.59905e-11
CARS2	-0.170197	-1.18942	-1.01922	4.35583	27.9122	1.63202e-12	2.59905e-11
TPI1	0.82735	1.29755	0.470203	5.10997	27.9024	1.64722e-12	2.6222e-11
CCND2	0.557444	-0.646862	-1.20431	5.10495	27.8929	1.66206e-12	2.64477e-11
HERC5	0.331655	-1.23791	-1.56957	3.59279	27.8924	1.66288e-12	2.645e-11
TSPYL5	0.39772	1.08436	0.686635	6.23032	27.8852	1.67417e-12	2.6619e-11
ZNF35	1.1873	0.000729821	-1.18657	3.28904	27.8519	1.72782e-12	2.745e-11
COL13A1	-1.23174	-0.53669	0.695049	2.01916	27.8202	1.78038e-12	2.82624e-11
LYVE1	-1.03882	0.19061	1.22943	3.4616	27.8133	1.792e-12	2.84241e-11
SLC18B1	0.237174	1.21845	0.981271	2.00354	27.8092	1.79899e-12	2.85236e-11
TLE3	1.08518	0.469704	-0.615475	1.83252	27.805	1.80616e-12	2.86257e-11
SELENOO	-0.530549	-1.01416	-0.48361	5.86697	27.7879	1.83558e-12	2.90689e-11
TLL2	1.0626	1.38167	0.319074	3.93917	27.7741	1.85971e-12	2.94392e-11
ARHGEF17	0.844235	1.22454	0.380303	4.59166	27.7242	1.94972e-12	3.08271e-11
CNPPD1	-0.000686859	-1.32694	-1.32625	2.59207	27.7018	1.99133e-12	3.14726e-11
LMO1	0.710279	1.23293	0.522647	1.6295	27.6698	2.05255e-12	3.23885e-11
VWA3B	-0.313624	1.08635	1.39997	3.51185	27.6679	2.05635e-12	3.24355e-11
PCTP	-0.314696	1.17674	1.49144	4.39317	27.6276	2.13631e-12	3.367e-11
LOC707659	1.29557	0.31928	-0.976291	2.81141	27.6207	2.15024e-12	3.38626e-11
ACYP1	1.02507	-0.0357344	-1.06081	2.91951	27.6186	2.15448e-12	3.3916e-11
SMIM2	0.708898	-0.418455	-1.12735	1.05081	27.6015	2.18972e-12	3.44161e-11
MRRF	0.974577	-0.194816	-1.16939	4.38484	27.5443	2.3115e-12	3.62582e-11
LYAR	0.65815	1.19942	0.541272	1.49873	27.5224	2.35995e-12	3.6989e-11
DYNLRB1	1.04743	0.707092	-0.340341	4.30075	27.4767	2.46413e-12	3.85305e-11
PCBP3	0.410159	-0.652534	-1.06269	5.76241	27.4643	2.49334e-12	3.89412e-11
LOC700021	0.377237	1.0211	0.643862	1.61327	27.4562	2.51245e-12	3.91941e-11
FTH1	1.04442	0.319558	-0.724862	3.8771	27.4562	2.51249e-12	3.91941e-11
RGS20	1.05272	0.945816	-0.106899	3.58051	27.4549	2.51549e-12	3.92254e-11
IKBKG	-0.49034	0.515145	1.00549	4.38449	27.4533	2.51932e-12	3.92697e-11
LOC114679337	1.53243	0.0677617	-1.46467	3.68013	27.4356	2.56194e-12	3.99183e-11
ETAA1	0.98612	-0.321864	-1.30798	2.47399	27.4123	2.61921e-12	4.07626e-11
STK11	0.159805	1.07059	0.910784	2.18877	27.3935	2.66612e-12	4.1444e-11
GABRD	-0.534403	0.479495	1.0139	5.45377	27.3874	2.68155e-12	4.16675e-11
EPN3	1.08348	0.906299	-0.177179	2.20489	27.3296	2.83247e-12	4.39265e-11
GABRA3	-1.06842	-0.649353	0.419067	5.36337	27.3207	2.85639e-12	4.42629e-11
CTSH	1.09428	0.076637	-1.01764	2.0539	27.2813	2.96488e-12	4.59082e-11
HSPH1	1.12886	0.575584	-0.55328	4.58236	27.2632	3.01627e-12	4.66312e-11
LOC106993840	0.263626	-0.78056	-1.04419	1.21527	27.2153	3.15615e-12	4.87747e-11
LOC114670307	-0.157879	0.899941	1.05782	1.62874	27.2124	3.16492e-12	4.88721e-11
CDK5	1.16517	0.972409	-0.192761	3.10582	27.2119	3.16646e-12	4.88768e-11
LOC114673545	1.19149	0.459018	-0.732468	4.00136	27.188	3.23898e-12	4.99186e-11
SSR1	0.559657	-0.478347	-1.038	5.33635	27.1612	3.32222e-12	5.11418e-11
PIWIL2	-0.346727	0.755163	1.10189	2.1388	27.0908	3.55107e-12	5.44956e-11
PAQR8	1.03046	0.879941	-0.150521	4.43509	27.0818	3.58167e-12	5.49226e-11
CCDC65	0.855943	-0.333358	-1.1893	2.89646	27.0631	3.64547e-12	5.57931e-11
RRP12	0.0366065	1.19857	1.16196	3.82936	27.0619	3.64978e-12	5.58375e-11
CAPN12	0.219065	1.08788	0.868812	1.89469	26.9924	3.89833e-12	5.95253e-11
LOC114673962	0.404217	1.32875	0.924528	3.13731	26.9668	3.99405e-12	6.094e-11
LOC114670951	0.504225	1.36605	0.861821	4.61736	26.9578	4.028e-12	6.14343e-11
SAMHD1	-0.0464632	0.975653	1.02212	4.18634	26.9508	4.0549e-12	6.18209e-11
PPIE	1.11545	0.770376	-0.345072	1.98761	26.9443	4.07997e-12	6.21552e-11
PTPRE	-1.08233	0.126746	1.20907	3.78652	26.9395	4.09851e-12	6.23899e-11
CDKN2D	1.05794	0.726227	-0.331709	1.54661	26.9233	4.1621e-12	6.33335e-11
TENM1	0.0826307	-0.934048	-1.01668	6.24285	26.9225	4.1652e-12	6.33564e-11
RPL18	0.966047	1.03097	0.0649216	2.7067	26.9101	4.21453e-12	6.40821e-11
RTKN	0.606626	-0.619152	-1.22578	1.65939	26.8177	4.59999e-12	6.97292e-11
TXNDC15	0.470131	-0.833824	-1.30396	3.48533	26.7911	4.71734e-12	7.14808e-11
RWDD1	1.11215	1.09311	-0.0190349	4.28417	26.7634	4.84276e-12	7.33253e-11
LOC106998958	1.08863	0.868704	-0.219929	1.9073	26.7627	4.84599e-12	7.33462e-11
DSC3	0.795399	-0.571056	-1.36646	3.36628	26.7371	4.96537e-12	7.50958e-11
NOC4L	0.711167	1.28239	0.57122	3.80101	26.6747	5.2677e-12	7.95166e-11
ESRRB	-1.07254	-0.651332	0.42121	3.94983	26.6714	5.28417e-12	7.97045e-11
CLCN4	0.170534	-0.951204	-1.12174	5.34805	26.6671	5.30605e-12	8.00041e-11
LOC697068	-0.942264	0.170968	1.11323	4.08563	26.6557	5.36352e-12	8.07786e-11
FUT9	0.469572	-0.848943	-1.31852	5.99427	26.6422	5.43243e-12	8.17854e-11
LOC114676289	0.8847	1.14738	0.262681	1.92304	26.5802	5.76154e-12	8.64859e-11
FAM8A1	1.21234	0.80343	-0.408915	2.56858	26.5522	5.91657e-12	8.86033e-11
EML6	0.937087	1.21392	0.276829	5.14278	26.5321	6.03054e-12	9.02419e-11
BOLA1	0.727141	-0.333326	-1.06047	0.9582	26.4916	6.2667e-12	9.36346e-11
CALR	-0.212737	0.866998	1.07973	2.78499	26.4719	6.38467e-12	9.52896e-11
BRIP1	0.423906	1.04413	0.620221	1.74029	26.4708	6.39139e-12	9.5354e-11
ZBTB47	0.514131	1.30691	0.792775	3.52867	26.4434	6.55996e-12	9.7722e-11
LOC114673767	-1.04783	-0.243486	0.804344	2.01881	26.4407	6.5765e-12	9.79315e-11
SOX13	-0.699591	0.641469	1.34106	3.81919	26.4361	6.60494e-12	9.83182e-11
ZADH2	0.804887	1.3242	0.519317	2.65284	26.4275	6.65916e-12	9.90881e-11
PDHX	0.345334	-0.730705	-1.07604	5.86503	26.3923	6.88557e-12	1.0238e-10
COLGALT2	1.32651	0.945191	-0.381316	2.7432	26.3805	6.96305e-12	1.03455e-10
REC114	0.744846	-0.39241	-1.13726	2.60756	26.3774	6.98316e-12	1.03715e-10
ISCA1	1.16935	0.622948	-0.546406	4.04871	26.3766	6.98897e-12	1.03762e-10
SYT2	-0.574368	1.0323	1.60667	3.21066	26.3702	7.0315e-12	1.04355e-10
YTHDF3	1.05858	0.619809	-0.438772	4.15997	26.3258	7.33401e-12	1.08763e-10
LOC705607	0.470172	-0.694354	-1.16453	1.87928	26.3073	7.46395e-12	1.10648e-10
FAM126A	0.865888	-0.514156	-1.38004	3.45735	26.2974	7.53422e-12	1.11565e-10
AGRN	0.601624	1.34004	0.738417	4.16311	26.2912	7.57885e-12	1.12142e-10
HMGCS1	0.805243	-0.525618	-1.33086	2.50119	26.2906	7.58296e-12	1.12161e-10
SMIM20	0.893782	-0.200765	-1.09455	1.55138	26.2862	7.61481e-12	1.1259e-10
PBX3	1.01758	-0.138116	-1.1557	4.19652	26.2857	7.61809e-12	1.12597e-10
SRSF6	0.669487	1.3141	0.644615	4.7654	26.2668	7.75593e-12	1.14549e-10
ACOT13	1.07003	0.124468	-0.945563	3.14523	26.2272	8.05277e-12	1.1858e-10
CPVL	-1.01561	-0.382282	0.633326	5.9734	26.1914	8.33127e-12	1.22544e-10
RPLP2	1.01163	0.727238	-0.284388	2.73106	26.1805	8.41826e-12	1.23778e-10
TMEM126B	1.12884	0.527567	-0.601275	2.82138	26.1758	8.45554e-12	1.2428e-10
C5H4orf27	0.289926	-1.04828	-1.33821	3.50174	26.1738	8.47123e-12	1.24464e-10
CABIN1	1.0481	0.881893	-0.166202	4.42557	26.1569	8.6087e-12	1.26437e-10
BASP1	-0.188382	0.993797	1.18218	4.4489	26.1547	8.62643e-12	1.26651e-10
PAIP2B	0.860926	-0.237117	-1.09804	2.15048	26.1351	8.78879e-12	1.28844e-10
HADHB	0.631427	-0.456167	-1.08759	5.08786	26.0799	9.26129e-12	1.3557e-10
PIGS	1.02205	1.13703	0.114975	2.99041	26.0706	9.3432e-12	1.36618e-10
EFCAB6	0.412387	-0.763285	-1.17567	3.14935	26.0603	9.43537e-12	1.37915e-10
C9orf72	1.18711	0.449084	-0.738025	3.6653	26.0191	9.81173e-12	1.43205e-10
IGHMBP2	-0.0108253	1.14729	1.15811	3.38122	25.9978	1.00116e-11	1.45939e-10
STS	0.664142	1.40419	0.740044	4.6185	25.9639	1.0339e-11	1.50512e-10
DDX60L	-0.442989	1.04034	1.48333	1.70278	25.9553	1.04236e-11	1.51689e-10
RTN4R	0.672341	1.27299	0.600645	3.10705	25.9504	1.04727e-11	1.52348e-10
CDH6	1.24507	1.36872	0.123651	4.81141	25.9358	1.06187e-11	1.54302e-10
ZNF624	0.0761233	1.04294	0.966817	2.20673	25.9105	1.0877e-11	1.57767e-10
LOC107000582	-0.239551	1.13833	1.37788	3.59338	25.9021	1.09635e-11	1.58917e-10
AAMDC	1.07316	0.991385	-0.0817762	3.4777	25.9021	1.09643e-11	1.58917e-10
SIN3B	1.01679	0.391333	-0.62546	3.85138	25.8999	1.09867e-11	1.59182e-10
CCDC34	1.03258	0.526872	-0.50571	1.62327	25.8687	1.13169e-11	1.63847e-10
SERF2	1.06827	0.387165	-0.681105	4.00674	25.8573	1.14406e-11	1.65561e-10
TFAP2E	1.01964	0.522397	-0.497243	1.78683	25.8474	1.15482e-11	1.67013e-10
LOC697790	0.813815	1.16086	0.347046	1.65283	25.8436	1.15902e-11	1.6756e-10
LOC106999023	0.864714	1.26941	0.404694	1.8096	25.8369	1.16643e-11	1.68508e-10
ZFP30	0.494207	-0.886317	-1.38052	3.83885	25.8315	1.17237e-11	1.69243e-10
LOC106996842	1.17761	0.554512	-0.623098	2.51222	25.7892	1.22048e-11	1.75892e-10
LOC106999515	1.02329	-0.0465166	-1.0698	1.38833	25.7891	1.22065e-11	1.75892e-10
ICMT	1.03759	0.894248	-0.143342	3.50989	25.7882	1.22162e-11	1.75969e-10
LOC106995186	0.102309	1.0959	0.99359	1.34015	25.7754	1.23658e-11	1.77994e-10
EVC	0.819197	-0.473828	-1.29302	2.30168	25.7458	1.27186e-11	1.82542e-10
SGSM1	0.757646	-0.285005	-1.04265	4.57563	25.7207	1.30256e-11	1.86813e-10
CLK4	1.14893	0.909167	-0.239759	4.28138	25.7191	1.30447e-11	1.8702e-10
LOC106998212	1.20578	0.496511	-0.709271	2.02661	25.7134	1.31162e-11	1.87909e-10
IGFL4	0.899142	-0.162049	-1.06119	4.96963	25.7109	1.31469e-11	1.8828e-10
TBRG4	0.262888	1.32075	1.05786	3.71101	25.7015	1.32651e-11	1.89767e-10
LOC114678989	-0.77917	0.484497	1.26367	1.99727	25.6813	1.35223e-11	1.93308e-10
PLPPR4	1.09632	0.153762	-0.942558	4.43738	25.6593	1.38073e-11	1.97169e-10
BDH2	0.862832	-0.314747	-1.17758	1.56572	25.6308	1.41857e-11	2.02427e-10
URM1	0.886144	1.15472	0.268572	3.68361	25.5374	1.55034e-11	2.20438e-10
LOC100426567	1.12761	0.0446522	-1.08296	3.98465	25.511	1.58972e-11	2.25874e-10
LOC705244	1.01185	0.271611	-0.740239	4.44104	25.4594	1.66959e-11	2.36884e-10
CPEB2	1.09444	0.549553	-0.544892	5.05453	25.4326	1.71254e-11	2.42891e-10
LOC106997165	1.18587	0.215532	-0.970339	2.23659	25.4242	1.72638e-11	2.44679e-10
ITGA10	0.631968	1.41574	0.783771	2.53196	25.4206	1.73221e-11	2.45417e-10
CD46	-0.180316	-1.13602	-0.955702	5.24259	25.3912	1.78138e-11	2.52203e-10
MIIP	-0.529646	0.638678	1.16832	2.05488	25.3834	1.79455e-11	2.53886e-10
LOC100423599	-0.429388	0.687954	1.11734	3.83647	25.3428	1.86515e-11	2.63686e-10
PRKAR1A	1.1326	0.685563	-0.447035	3.97208	25.3424	1.86597e-11	2.63709e-10
AKR1B1	0.869518	1.28623	0.416709	2.62497	25.3337	1.88144e-11	2.65801e-10
FSIP2	0.525542	-0.942072	-1.46761	1.81903	25.3316	1.88523e-11	2.66241e-10
LOC114680427	1.02197	-0.567947	-1.58992	4.24047	25.2538	2.02989e-11	2.86161e-10
F8	0.494549	-0.684428	-1.17898	3.39811	25.2395	2.0577e-11	2.89876e-10
AKIP1	1.03905	0.753626	-0.285424	1.44736	25.234	2.06838e-11	2.91276e-10
LOC106992798	0.845968	-0.422886	-1.26885	3.64122	25.2297	2.07692e-11	2.92376e-10
LOC704512	0.644282	1.45963	0.815353	4.11332	25.218	2.1001e-11	2.95534e-10
LOC106993406	0.248737	-1.53232	-1.78106	6.95308	25.2165	2.10323e-11	2.95869e-10
CCNE2	0.744112	-0.488534	-1.23265	2.23749	25.2088	2.11865e-11	2.97933e-10
ZDHHC15	0.694055	-0.399587	-1.09364	5.52598	25.1615	2.21595e-11	3.11175e-10
ZNF782	1.15086	0.974594	-0.176269	4.15366	25.1574	2.2246e-11	3.12278e-10
PTPN18	1.02505	-0.00436498	-1.02941	3.78526	25.1469	2.24699e-11	3.15199e-10
ARNT2	-0.792745	-1.16087	-0.368121	5.20099	25.1318	2.27946e-11	3.19414e-10
FASN	0.930978	1.05381	0.122835	2.32328	25.1217	2.30151e-11	3.22276e-10
LOC106994123	-0.637381	-1.11207	-0.474692	5.84414	25.0798	2.39517e-11	3.34918e-10
LOC114679652	1.0569	0.707541	-0.349358	3.92514	25.076	2.40364e-11	3.35984e-10
LOC704549	1.03129	1.04643	0.0151362	4.62887	25.0303	2.51046e-11	3.50545e-10
MAPK11	-0.643587	0.795842	1.43943	3.06087	24.9955	2.59492e-11	3.61829e-10
RPS15	1.15111	0.745531	-0.405575	3.55927	24.9642	2.67351e-11	3.72526e-10
PAIP1	0.324297	-0.797983	-1.12228	4.99205	24.9579	2.68937e-11	3.74605e-10
LOC114677021	0.70599	1.27057	0.564577	1.66859	24.9439	2.7256e-11	3.79518e-10
MDH1B	1.00828	-0.16289	-1.17117	4.45613	24.9364	2.745e-11	3.82084e-10
MEST	1.18641	0.676753	-0.50966	3.37314	24.9287	2.76514e-11	3.84753e-10
ADGRD1	-0.432368	0.694343	1.12671	1.56433	24.9261	2.77205e-11	3.8558e-10
CGGBP1	1.09219	0.978601	-0.113584	1.91018	24.9228	2.78075e-11	3.86654e-10
BMS1	1.02009	0.686931	-0.333159	4.47677	24.9197	2.7891e-11	3.87678e-10
ZGRF1	0.360694	1.21529	0.854596	2.7313	24.8922	2.86292e-11	3.97383e-10
HCFC1	0.163087	1.13383	0.970746	1.74496	24.8867	2.87784e-11	3.99314e-10
DSEL	-1.06034	-0.577526	0.482812	1.45594	24.8806	2.89466e-11	4.01508e-10
LOC106992883	-1.04665	-0.784208	0.262439	2.57529	24.8763	2.90668e-11	4.03034e-10
CDH17	0.698476	-0.900347	-1.59882	3.5691	24.8592	2.9542e-11	4.0948e-10
MCOLN1	1.06755	0.635138	-0.432414	2.96996	24.8491	2.98264e-11	4.13278e-10
LOC114677068	-1.15098	-0.716504	0.434481	3.60204	24.7933	3.14549e-11	4.34476e-10
GLIS3	0.607697	1.3198	0.712104	2.23439	24.7868	3.16483e-11	4.36844e-10
PEX1	-0.159137	-1.13543	-0.976288	4.37243	24.7691	3.21866e-11	4.44119e-10
VSTM5	-0.691141	-1.30453	-0.613391	2.61737	24.7666	3.2264e-11	4.45033e-10
ANKAR	0.775482	-0.465307	-1.24079	4.44309	24.7602	3.24617e-11	4.47448e-10
COX11	1.17078	0.679927	-0.490849	2.64342	24.7564	3.25782e-11	4.48897e-10
MRPS11	1.2042	0.385332	-0.818867	3.46543	24.7537	3.26625e-11	4.49747e-10
RAD50	0.579574	-0.52412	-1.10369	5.47939	24.7477	3.28488e-11	4.52156e-10
RPS3	1.13453	0.436626	-0.697903	3.29448	24.6922	3.46297e-11	4.7555e-10
LOC106998871	1.08177	0.823138	-0.258635	2.15486	24.6922	3.46323e-11	4.7555e-10
ENHO	1.09574	0.981778	-0.113958	2.59312	24.6819	3.49732e-11	4.79898e-10
LOC114678440	0.26363	1.00106	0.737434	0.844178	24.6773	3.51261e-11	4.8183e-10
IL15	0.784413	-0.629093	-1.41351	2.13247	24.6672	3.54657e-11	4.86152e-10
ACTB	0.309203	1.02194	0.712739	2.03147	24.639	3.64303e-11	4.98858e-10
RNF11	1.03012	0.49336	-0.536759	4.07013	24.6287	3.67878e-11	5.03405e-10
LOC106999401	-0.171135	0.993073	1.16421	2.0924	24.6281	3.6809e-11	5.03522e-10
ADRA1D	0.0220526	1.21868	1.19663	2.14575	24.6218	3.70306e-11	5.06379e-10
ACADS	0.0311793	1.0607	1.02952	1.79636	24.5639	3.9129e-11	5.33786e-10
NME6	1.01247	0.989869	-0.0225978	3.07101	24.5452	3.9833e-11	5.42642e-10
MTFMT	0.305159	-0.848286	-1.15345	4.58582	24.5356	4.01976e-11	5.47421e-10
KLHL28	0.832739	-0.250805	-1.08354	4.76715	24.5258	4.05727e-11	5.52151e-10
LOC711616	0.871423	1.10739	0.235963	4.83195	24.5134	4.10571e-11	5.58169e-10
LOC106992989	0.213448	-0.884442	-1.09789	1.42035	24.5111	4.11467e-11	5.59195e-10
WDR36	1.07148	0.309311	-0.762172	4.70929	24.508	4.12672e-11	5.60641e-10
DBF4	0.828258	-0.444658	-1.27292	2.33223	24.4998	4.15915e-11	5.64853e-10
SPATA6L	1.01859	0.0309404	-0.987654	4.33683	24.4663	4.2939e-11	5.82356e-10
LOC114672800	0.214015	1.38186	1.16785	3.81668	24.4466	4.37528e-11	5.92987e-10
LOC699413	0.278462	1.09564	0.817177	1.26078	24.4447	4.38317e-11	5.93854e-10
IFT27	0.892957	-0.270455	-1.16341	2.33955	24.4348	4.42463e-11	5.99062e-10
PRRC2A	-0.484791	0.619574	1.10436	2.73462	24.4147	4.51012e-11	6.10427e-10
CCDC85B	0.751173	1.11964	0.368467	1.70889	24.4087	4.53618e-11	6.13746e-10
LOC717626	1.20446	0.501787	-0.70267	3.47582	24.4063	4.54637e-11	6.14706e-10
LRRC63	0.869482	1.31547	0.445983	2.32495	24.4039	4.55658e-11	6.15875e-10
ANKRD16	0.175058	-1.07395	-1.24901	3.6842	24.3997	4.57519e-11	6.18181e-10
METTL21A	0.983777	1.04438	0.0605998	3.05073	24.3903	4.61619e-11	6.23084e-10
CABYR	1.18528	0.367353	-0.817931	2.85761	24.3752	4.68316e-11	6.31908e-10
FAM127A	0.857516	1.18813	0.330617	4.04368	24.3681	4.71499e-11	6.35987e-10
SLC4A5	1.1144	0.728905	-0.385493	3.97453	24.3512	4.79113e-11	6.46037e-10
ZKSCAN4	0.790226	-0.516354	-1.30658	2.24287	24.3506	4.79389e-11	6.4619e-10
TRIP10	-0.180513	0.853139	1.03365	1.2082	24.3452	4.81871e-11	6.49315e-10
C6H5orf30	0.984556	1.16564	0.18108	2.32144	24.3299	4.88948e-11	6.57957e-10
INTU	0.413903	-0.89528	-1.30918	3.16244	24.3112	4.97736e-11	6.68875e-10
LOC106992837	-0.0100749	-1.15627	-1.14619	2.5802	24.3005	5.02826e-11	6.75257e-10
ANGPT1	0.417993	1.4758	1.05781	3.7104	24.2873	5.09184e-11	6.82871e-10
LOC114674888	1.00881	1.14331	0.134503	4.07607	24.2794	5.13051e-11	6.87498e-10
VSTM2L	0.838205	1.06027	0.222069	1.79548	24.2397	5.32812e-11	7.12632e-10
IL1RL2	0.284316	-0.905389	-1.1897	1.26173	24.2187	5.43562e-11	7.26519e-10
LOC114673989	0.578324	-0.609337	-1.18766	2.25187	24.2117	5.47212e-11	7.30326e-10
LOC114676889	0.37935	-0.739329	-1.11868	1.55929	24.2115	5.47331e-11	7.30326e-10
LTBP2	0.646377	1.11076	0.464379	2.15876	24.1845	5.61564e-11	7.48313e-10
ALKAL2	0.970439	1.13928	0.168838	2.27098	24.1746	5.66883e-11	7.54386e-10
EMC10	0.166659	1.19897	1.03231	2.68112	24.1523	5.79096e-11	7.7038e-10
MOCS2	0.649502	-0.753359	-1.40286	4.17304	24.1434	5.8401e-11	7.76397e-10
SGSM3	-0.264957	0.90859	1.17355	4.56499	24.1314	5.90705e-11	7.84771e-10
LOC705840	-0.462669	0.546064	1.00873	2.03645	24.1055	6.05492e-11	8.03071e-10
ZNF404	0.916581	1.20264	0.286057	3.57476	24.0959	6.1103e-11	8.10146e-10
BCDIN3D	1.02231	0.19797	-0.82434	1.99765	24.0796	6.20613e-11	8.22302e-10
LOC700996	0.392553	-0.623106	-1.01566	0.859277	24.0524	6.3691e-11	8.4277e-10
STAT2	-0.0854187	-1.11032	-1.0249	2.26493	24.051	6.37769e-11	8.43625e-10
KLHL25	0.175049	1.24275	1.0677	3.30903	24.0228	6.55145e-11	8.65167e-10
RNASEH2A	1.04766	0.635799	-0.411861	2.81402	24.0031	6.6753e-11	8.80935e-10
PPP1R16A	-0.659151	0.531923	1.19107	3.13422	23.9999	6.69562e-11	8.83323e-10
PDCD4	1.05221	0.097198	-0.955014	3.01272	23.9951	6.72624e-11	8.87068e-10
VRK1	1.07639	0.259592	-0.816796	4.5193	23.9906	6.7556e-11	8.90347e-10
SRXN1	1.02121	1.02236	0.00115081	2.04184	23.9715	6.87919e-11	9.06335e-10
WNT5A	1.09146	0.685496	-0.405967	1.57023	23.9639	6.92947e-11	9.12353e-10
LOC711652	0.886989	-0.336139	-1.22313	3.46715	23.9559	6.98242e-11	9.18715e-10
SNCA	-0.394016	1.17104	1.56506	3.24185	23.954	6.99498e-11	9.20063e-10
LOC699683	0.556872	1.0036	0.446726	1.44683	23.9182	7.23778e-11	9.50738e-10
RBPMS	-0.0830051	1.00644	1.08945	3.27594	23.8978	7.38011e-11	9.67512e-10
TUSC3	0.824274	-0.274529	-1.0988	4.858	23.8961	7.39204e-11	9.68755e-10
SLC25A42	0.395029	1.03705	0.642018	4.72717	23.892	7.42103e-11	9.72233e-10
PDGFRB	-0.236156	0.938077	1.17423	1.36811	23.874	7.54965e-11	9.87779e-10
[truncated: 496 more rows]

## Sheet: human_donor_deg
gene	H200.1030.H200.1025	H200.1030.H200.1023	H200.1025.H200.1023	AveExpr	F	P.Value	adj.P.Val
ARSDP1	-0.0299395	2.04665	2.07659	4.1924	420.112	8.53256e-121	3.80936e-116
LINC01060	4.49402	4.59839	0.104371	1.9102	414.653	1.0366e-119	2.31395e-115
LOC105371799	4.39467	3.88604	-0.508633	2.03841	333.779	1.13445e-102	1.68826e-98
PKD1P2	-0.229344	-4.17165	-3.94231	2.55543	322.505	3.87741e-100	4.32768e-96
LOC644172	4.1218	4.10989	-0.0119117	1.72262	301.866	2.1798e-95	1.94635e-91
LOC105377221	0.311161	3.68935	3.37819	1.82966	293.721	1.79692e-93	1.33706e-89
KALP	-0.529717	2.72109	3.25081	1.55639	268.168	2.66716e-87	1.70108e-83
LOC105377215	-0.615755	3.08041	3.69617	1.64924	263.458	3.90325e-86	2.17826e-82
ARSEP1	0.446082	2.02263	1.57654	4.03901	262.841	5.55546e-86	2.75582e-82
LRRC37A	0.985093	1.63444	0.649346	4.45147	256.113	2.67013e-84	1.19208e-80
LOC101060389	-3.98521	0.285659	4.27087	0.726465	230.712	8.87824e-78	3.60335e-74
LOC105376607	3.29037	3.45155	0.161176	1.78965	230.298	1.14016e-77	4.24186e-74
LOC105377222	0.266317	3.40478	3.13846	1.68878	221.787	2.03037e-75	6.97276e-72
NELL1	-2.82763	-3.05162	-0.223987	2.29401	209.498	4.13801e-72	1.31958e-68
TUBBP2	3.5791	3.10614	-0.472961	2.23567	208.668	6.96569e-72	2.07322e-68
TSIX	0.174201	-0.999008	-1.17321	4.77238	187.6	4.98181e-66	1.39008e-62
OFD1P4Y	0.264238	3.13296	2.86872	1.88609	187.098	6.91365e-66	1.81565e-62
RMRP	1.58081	2.79251	1.2117	2.1005	186.238	1.2128e-65	3.00808e-62
SEMA3E	-3.08059	-2.42299	0.657602	2.7491	185.45	2.03055e-65	4.77126e-62
GAPDHP1	-2.60236	-2.30297	0.299396	3.48989	182.886	1.09358e-64	2.44115e-61
TOX	-1.2637	-2.7756	-1.5119	1.74126	180.411	5.59434e-64	1.18933e-60
LRRC37A4P	-0.638326	-1.97334	-1.33501	4.4964	177.694	3.38637e-63	6.87202e-60
FOXI2	-2.16637	0.0488482	2.21522	0.355984	175.694	1.28178e-62	2.48805e-59
LOC105376055	0.34817	1.4351	1.08693	4.67043	161.912	1.4227e-58	2.64651e-55
PPP2CBP1	-2.40707	-3.65155	-1.24447	2.15243	161.769	1.56953e-58	2.80287e-55
LOC105372733	-0.0252526	0.981915	1.00717	4.67324	152.974	6.83839e-56	1.17423e-52
LOC105376053	0.890874	2.10825	1.21738	4.15275	152.761	7.93277e-56	1.3117e-52
LOC105378478	-1.22841	1.31448	2.54289	1.40255	147.67	2.81166e-54	4.48309e-51
TEKT4P2	-3.34097	-1.39274	1.94822	3.07116	143.998	3.77252e-53	5.80772e-50
LINC00113	-2.05272	-3.48879	-1.43607	2.15759	140.384	4.9494e-52	7.36553e-49
LOC284825	-2.25065	-3.39714	-1.14649	2.54251	139.574	8.83097e-52	1.2718e-48
BMS1P7	-1.92571	-1.58954	0.336173	4.11947	137.733	3.30821e-51	4.61548e-48
LOC102724739	-2.2919	0.119552	2.41146	0.424699	137.464	4.01419e-51	5.43072e-48
LOC105379273	-3.41825	-0.832242	2.58601	3.07289	136.473	8.19095e-51	1.07554e-47
ARL17B	0.353305	1.10241	0.749105	4.41719	135.111	2.18838e-50	2.79144e-47
TBC1D3L	-0.0742739	-2.81415	-2.73987	3.51613	134.378	3.7178e-50	4.61058e-47
FXYD7	0.221844	-2.67164	-2.89348	3.55586	134.228	4.14701e-50	5.00387e-47
NPIPA3	0.307159	-1.7852	-2.09236	4.23444	132.922	1.06835e-49	1.25517e-46
LOC100506055	1.34008	2.8833	1.54322	1.48436	132.847	1.12832e-49	1.29164e-46
GABRE	-1.84155	0.248989	2.09054	0.738679	132.363	1.60325e-49	1.78943e-46
LOC101927973	-1.78455	-2.72351	-0.938963	3.14217	131.25	3.60201e-49	3.82885e-46
LOC105376065	0.253284	1.05274	0.79946	4.71115	127.702	4.82228e-48	5.00676e-45
LOC105372763	-2.22013	-3.38628	-1.16615	2.09639	127.588	5.24177e-48	5.31861e-45
OFD1P10Y	-1.00346	2.53159	3.53505	2.33912	126.379	1.27447e-47	1.26441e-44
LOC105379259	0.586348	1.94351	1.35716	4.12133	125.089	3.29653e-47	3.19942e-44
LOC102723608	2.75057	2.79319	0.0426231	1.16633	123.473	1.08813e-46	1.03361e-43
LOC102723414	2.93039	2.848	-0.082389	1.11149	122.236	2.72132e-46	2.53111e-43
DUX4L26	-1.54992	-3.05703	-1.50711	3.82369	121.791	3.78806e-46	3.45139e-43
SNORD116-2	-3.10674	0.855283	3.96203	1.8431	120.915	7.2657e-46	6.48754e-43
XKR9	-2.31592	-1.75255	0.563366	3.86036	118.413	4.69862e-45	4.11313e-42
LOC105376252	-1.71228	0.0847989	1.79708	0.360958	110.76	1.51135e-42	1.27309e-39
LOC101928816	-0.945817	1.25563	2.20145	1.58067	110.363	2.04447e-42	1.69029e-39
LOC100506159	2.98156	2.83583	-0.145734	2.24735	108.094	1.15502e-41	9.20819e-39
LOC102723933	2.73339	2.61005	-0.123336	1.12612	106.328	4.47087e-41	3.50179e-38
BMS1P6	-1.76416	-1.53265	0.231516	4.14561	106.042	5.56863e-41	4.28641e-38
LOC105372762	-1.71777	-3.12356	-1.4058	1.88885	105.947	5.99003e-41	4.53262e-38
LOC102723819	2.59375	2.53507	-0.0586887	0.976788	105.348	9.498e-41	7.06731e-38
LOC101927602	-2.08919	0.25162	2.34081	0.496047	103.443	4.12697e-40	3.02047e-37
LOC105379371	-1.33137	1.43511	2.76648	1.85987	100.218	5.03568e-39	3.51278e-36
OR2F1	1.77843	3.22608	1.44764	2.00836	99.442	9.21498e-39	6.32927e-36
LOC101930452	-3.73847	-2.81351	0.924961	2.88374	98.4269	2.03519e-38	1.37668e-35
LOC105375236	0.33399	2.68544	2.35145	3.28408	97.0908	5.7904e-38	3.85839e-35
FAM118A	1.09954	-1.46302	-2.56256	3.37114	96.0168	1.34492e-37	8.70204e-35
LOC102724355	-1.37256	-2.84083	-1.46826	1.87921	95.8663	1.51376e-37	9.65452e-35
NCALD	-0.0792187	-1.71754	-1.63832	3.55481	95.3013	2.36057e-37	1.48433e-34
LRRC37A2	0.496462	1.16777	0.671311	4.4773	95.2065	2.54348e-37	1.57714e-34
PKD1P6	-0.0367168	-1.16461	-1.1279	4.77203	94.9318	3.15751e-37	1.90496e-34
MEIKIN	1.31958	1.90285	0.583267	3.9614	94.4318	4.6823e-37	2.78722e-34
TARBP1	-0.769192	-1.24132	-0.472125	4.48688	94.2531	5.39091e-37	3.16681e-34
DNAH11	2.64905	2.59182	-0.0572364	2.2825	94.0793	6.18302e-37	3.58495e-34
LOC101928067	-1.03438	-2.86445	-1.83008	2.51056	93.8514	7.40171e-37	4.23653e-34
OVOS2	-3.42772	-2.63814	0.789588	3.10915	93.3147	1.13092e-36	6.39112e-34
PDXDC2P	0.686158	1.16495	0.478791	4.22942	93.2274	1.21178e-36	6.7625e-34
PLXDC2	-0.749009	-1.08308	-0.334074	4.00776	90.8761	7.81309e-36	4.25385e-33
BMS1P3	-1.75827	-1.50185	0.25642	3.98922	90.7186	8.85569e-36	4.7634e-33
ZDHHC11	1.77169	-0.579944	-2.35164	4.43622	89.4454	2.44024e-35	1.29696e-32
PAX8-AS1	1.47728	1.93163	0.454353	2.70512	88.1124	7.07529e-35	3.71619e-32
HSPE1P8	-0.539469	0.694327	1.2338	3.96147	87.9554	8.02174e-35	4.16431e-32
LOC100132215	-0.586715	1.75676	2.34348	2.27559	86.1881	3.30794e-34	1.69751e-31
LOC105371747	2.46444	2.3703	-0.0941461	1.00728	85.3079	6.7129e-34	3.40565e-31
RPS28P7	-0.0487477	-2.1031	-2.05435	3.31649	85.2142	7.23931e-34	3.63145e-31
LOC105379479	-0.704021	-2.37027	-1.66625	4.06313	85.159	7.5681e-34	3.7542e-31
ZDHHC11B	0.423567	-1.42344	-1.84701	4.07183	85.1434	7.66359e-34	3.75979e-31
LOC101929817	-1.12417	-1.93702	-0.812853	3.74136	84.2857	1.52987e-33	7.42402e-31
LOC613037	0.590375	-1.1465	-1.73687	4.28074	83.0579	4.1254e-33	1.98041e-30
LOC105372761	-1.20219	-2.76273	-1.56054	1.65328	82.9845	4.3777e-33	2.07917e-30
PAX8	1.93199	2.38951	0.457514	1.24826	82.8217	4.99429e-33	2.34705e-30
STS	-0.0670187	-1.80696	-1.73994	4.21446	82.1852	8.36327e-33	3.88935e-30
RN7SK	0.670624	1.09647	0.425842	4.22376	81.0131	2.16568e-32	9.96771e-30
RNR1	2.21367	1.16095	-1.05272	2.98464	80.1524	4.36274e-32	1.98749e-29
LOC105371873	2.37856	2.78717	0.408611	2.44071	78.418	1.79674e-31	8.10257e-29
OR11A1	-0.697389	1.03473	1.73212	3.87472	78.3627	1.87994e-31	8.39297e-29
PYGM	0.0275072	-2.30031	-2.32781	3.32032	78.1832	2.17721e-31	9.62392e-29
MIR4461	1.87103	1.42547	-0.445553	2.67275	77.8788	2.79322e-31	1.22258e-28
BCYRN1P1	-1.6818	1.33589	3.01769	2.35056	77.7314	3.1517e-31	1.36609e-28
ZFP36L1	-0.0495063	1.72749	1.77699	1.36042	77.5626	3.61886e-31	1.5535e-28
LOC100506136	1.49056	2.26588	0.775314	2.41684	76.9221	6.11913e-31	2.57725e-28
LOC102724441	2.03641	-1.12613	-3.16254	2.42458	76.5148	8.5488e-31	3.56693e-28
MTND4P12	1.88405	1.37634	-0.507705	2.7516	76.0739	1.2282e-30	5.07714e-28
MACROD2-AS1	-2.29174	-1.48772	0.804028	4.1727	75.3389	2.24878e-30	9.21071e-28
LOC105378824	2.06114	2.33647	0.275324	3.54707	75.2963	2.32927e-30	9.45364e-28
RPS25	-1.1877	-1.74253	-0.554829	3.36836	74.8904	3.25456e-30	1.30901e-27
PLCG2	1.94315	1.87719	-0.0659525	1.34435	74.6824	3.86354e-30	1.54007e-27
ASIP	0.508012	1.17118	0.663164	3.2916	74.5478	4.31716e-30	1.6907e-27
LOC105371131	0.165068	-1.25867	-1.42373	4.29688	74.3269	5.18071e-30	2.01124e-27
LOC105377223	-0.368351	1.81013	2.17848	0.985904	73.9423	7.11826e-30	2.73961e-27
LPIN3	-0.17915	0.889458	1.06861	3.51493	73.751	8.33735e-30	3.18138e-27
LOC105375005	-0.610385	1.14774	1.75813	3.33959	73.3206	1.19027e-29	4.50336e-27
GTF2H2	0.148496	1.10034	0.951848	4.1402	72.9943	1.55943e-29	5.80172e-27
PCP4	-0.429077	-1.14964	-0.720565	4.86389	72.9447	1.62479e-29	5.99493e-27
LUZP2	-2.08723	-0.348727	1.73851	1.28216	72.7063	1.97964e-29	7.24436e-27
TBC1D3K	-2.0684	0.187194	2.25559	0.500398	72.5561	2.24219e-29	8.13841e-27
TRNS1	1.98723	1.67393	-0.313307	2.71946	72.4656	2.41683e-29	8.70155e-27
LOC729162	-0.0859594	-1.90244	-1.81649	2.81804	72.3271	2.71093e-29	9.68235e-27
JAM2	0.687198	1.61776	0.930566	2.40204	72.0252	3.48288e-29	1.23407e-26
P2RY10	-0.282995	1.11298	1.39598	3.73372	70.3463	1.40724e-28	4.94696e-26
SMOC2	2.14428	2.08443	-0.0598461	0.95856	70.035	1.82428e-28	6.36289e-26
LOC105371862	2.57151	2.14434	-0.42717	1.90021	69.1342	3.87015e-28	1.3394e-25
LOC105377632	1.41308	1.58733	0.174252	1.0617	69.1172	3.92552e-28	1.34812e-25
FTL	-0.881753	-1.48838	-0.606631	3.51551	69.0924	4.00754e-28	1.36578e-25
TFAP4	-2.19	-0.0387411	2.15126	1.06403	68.696	5.58282e-28	1.87402e-25
HMGN3	-0.64195	-1.09262	-0.450666	4.3404	68.4045	7.12551e-28	2.37402e-25
LINC00473	2.21045	1.08794	-1.12251	4.419	68.1759	8.62868e-28	2.83255e-25
GALNTL6	-1.53642	-1.39579	0.140633	3.18257	68.0772	9.37263e-28	3.05432e-25
LOC105376128	-1.47758	0.869392	2.34697	2.83507	67.7211	1.26334e-27	4.08709e-25
LOC102724219	2.18622	-0.920785	-3.10701	2.44756	67.3866	1.67258e-27	5.3721e-25
TMEM132C	2.64787	0.473547	-2.17432	3.81226	67.2003	1.95569e-27	6.23657e-25
LOC105377240	-1.41787	1.47644	2.89431	2.62281	66.6452	3.11801e-27	9.80249e-25
LOC102724951	2.23107	-0.859609	-3.09068	2.46147	66.6369	3.13978e-27	9.80249e-25
ABCC4	-0.734035	-2.16166	-1.42762	2.96841	66.3039	4.1548e-27	1.28813e-24
RNR2	2.02011	0.788813	-1.23129	3.19802	66.1482	4.73653e-27	1.45836e-24
LOC101928499	-1.55438	0.00870736	1.56309	0.309794	65.6836	7.00485e-27	2.142e-24
CALM2	-0.735055	-1.20182	-0.466765	4.1243	65.4399	8.60212e-27	2.59487e-24
DAPL1	-0.0989215	-2.02619	-1.92727	1.05696	65.3855	9.00606e-27	2.69849e-24
BMS1P5	-1.52296	-0.838804	0.684155	4.30223	65.3209	9.51005e-27	2.83051e-24
FGFR2	-0.717414	-1.32407	-0.606658	3.30172	65.166	1.08375e-26	3.20424e-24
LOC101927337	2.07269	1.65824	-0.414454	2.83228	64.9884	1.25903e-26	3.698e-24
LOC101930105	0.0267126	-2.11708	-2.14379	1.92527	64.892	1.3657e-26	3.98508e-24
LOC728715	-2.6698	-2.57685	0.0929518	2.16127	64.7945	1.48298e-26	4.29921e-24
LOC102724843	2.3255	-0.734709	-3.06021	2.43992	64.7313	1.56422e-26	4.50545e-24
PNN	-0.402251	-1.38759	-0.985339	3.9064	64.1392	2.58015e-26	7.38403e-24
PER1	2.05054	1.95759	-0.0929517	1.77844	64.0347	2.81866e-26	8.01522e-24
PRSS3	-0.780136	-2.45251	-1.67237	2.1224	63.833	3.34319e-26	9.44663e-24
MTND5P11	2.24131	1.35784	-0.883479	2.50732	63.8192	3.38258e-26	9.49782e-24
SPATA3-AS1	-1.63258	0.62498	2.25756	0.600983	63.7402	3.61652e-26	1.00912e-23
GTF2H2B	-0.0605651	0.949715	1.01028	4.19912	62.8595	7.62913e-26	2.11554e-23
NAV2	0.935877	1.00256	0.0666804	3.8979	62.6953	8.7699e-26	2.41686e-23
MBOAT1	-0.256783	0.817965	1.07475	3.40522	62.5476	9.94067e-26	2.7061e-23
C19ORF60	0.502046	-1.01186	-1.5139	4.71149	61.2365	3.03163e-25	8.20285e-23
LOC101927042	-1.95291	0.156234	2.10914	0.728051	60.8415	4.24485e-25	1.14163e-22
PSMD5-AS1	-1.73376	-1.31016	0.423599	3.42415	60.5702	5.34983e-25	1.4302e-22
GLUD1P5	-1.61409	0.147591	1.76168	0.499204	60.4078	6.14519e-25	1.63305e-22
TMSB4X	-0.382727	-1.24469	-0.861958	3.23982	60.3817	6.28372e-25	1.65998e-22
HMP19	0.278436	-1.58145	-1.85988	1.96933	60.0487	8.35041e-25	2.19296e-22
DUSP1	1.33337	1.75855	0.425177	3.43331	59.8002	1.03253e-24	2.69575e-22
THNSL2	-0.284067	-2.04775	-1.76368	1.24676	59.1568	1.79035e-24	4.64711e-22
PALM2-AKAP2	0.104286	-1.50869	-1.61298	3.46753	58.9958	2.05493e-24	5.30303e-22
LOC105369172	1.94239	0.995018	-0.947377	4.50117	58.3358	3.61818e-24	9.23048e-22
LOC101928465	-1.07743	0.886223	1.96365	3.53493	58.2167	4.00746e-24	1.01655e-21
ENPP2	-0.410368	-1.28278	-0.872407	2.20931	57.876	5.36853e-24	1.35411e-21
RREB1	1.12407	2.02878	0.90471	3.42375	57.8614	5.43662e-24	1.35994e-21
LOC102724643	-1.25441	-0.389549	0.864857	4.5362	57.2935	8.8564e-24	2.1845e-21
LOC101928212	1.70453	2.38375	0.679217	1.73954	57.2428	9.25123e-24	2.26935e-21
MCC	-0.744124	-1.82336	-1.07924	2.98552	57.0017	1.13837e-23	2.77718e-21
LOC400464	-2.16789	-1.98909	0.178798	2.08482	56.9952	1.14476e-23	2.77759e-21
CARTPT	0.730193	-1.76404	-2.49423	1.9319	56.9841	1.15571e-23	2.78901e-21
LOC105369474	1.13515	2.01297	0.877824	2.67888	56.3117	2.06252e-23	4.89794e-21
ZDHHC22	0.144989	-1.88201	-2.027	3.40008	55.889	2.96994e-23	7.01549e-21
LOC101928704	1.43711	1.77629	0.339185	4.34984	55.7389	3.38054e-23	7.94339e-21
ANKRD20A7P	-0.360477	-1.25206	-0.891586	4.28116	55.636	3.69456e-23	8.6358e-21
COL6A1	1.67332	1.5513	-0.122018	4.17759	55.2984	4.94567e-23	1.15e-20
SNX31	1.48514	2.17348	0.688344	1.50663	55.0927	5.90819e-23	1.36669e-20
VIPR2	0.205688	-1.63185	-1.83754	3.12166	55.0136	6.32632e-23	1.45587e-20
SNORD116-6	-2.22507	0.305665	2.53073	0.901537	54.872	7.15041e-23	1.63708e-20
LOC285696	1.8725	1.30351	-0.568986	4.08877	54.8212	7.47199e-23	1.70197e-20
DUX4L9	-1.73898	-2.50137	-0.762387	2.87031	54.785	7.70999e-23	1.74727e-20
ANKRD20A2	0.466604	1.11015	0.643545	4.34437	54.4857	9.99002e-23	2.25255e-20
RPL9P8	-0.344682	-2.1073	-1.76261	2.08256	54.3822	1.09262e-22	2.45126e-20
LOC101930100	-1.92995	-1.19356	0.736385	3.27558	54.3373	1.13595e-22	2.53399e-20
LOC101930028	1.76227	1.83404	0.07177	0.839503	54.3324	1.14085e-22	2.53399e-20
ARL15	-0.183828	-1.51138	-1.32755	3.22449	54.2807	1.19309e-22	2.62391e-20
TEX26	-1.93827	-0.0268763	1.91139	0.458231	54.0509	1.45591e-22	3.1707e-20
LOC105376025	2.06494	1.96496	-0.0999793	2.78545	53.9011	1.6579e-22	3.59306e-20
LOC105376432	2.29061	1.99981	-0.290801	2.0801	53.0963	3.33394e-22	7.15595e-20
LOC101927354	2.19536	1.99254	-0.202827	1.70944	53.0907	3.35021e-22	7.15647e-20
NPM1P17	-1.60833	0.862051	2.47038	3.01551	52.9318	3.84637e-22	8.13845e-20
LINC00486	1.38361	1.22302	-0.160593	2.89944	52.2968	6.68265e-22	1.4073e-19
MC2R	-1.6454	0.409761	2.05516	0.860307	51.9862	8.7583e-22	1.83575e-19
LOC101927209	-2.426	-1.04558	1.38043	3.27346	51.9685	8.89487e-22	1.85566e-19
AKAP2	-0.0310337	-1.7261	-1.69506	3.11698	51.6552	1.16879e-21	2.42701e-19
LOC105377762	1.54707	2.03077	0.483696	1.26108	51.0248	2.02601e-21	4.13019e-19
RNPS1P1	0.215692	-1.79112	-2.00682	3.86653	50.7986	2.46878e-21	5.00994e-19
PALM2	0.165775	-1.27263	-1.43841	3.56757	50.7449	2.58732e-21	5.22674e-19
TRIM31-AS1	0.00756317	-1.7409	-1.74846	0.864611	50.6879	2.7195e-21	5.46902e-19
MIR5047	-1.68044	-1.72919	-0.0487548	2.37813	50.5975	2.94313e-21	5.89221e-19
TRIM31	-2.88358e-17	-1.78261	-1.78261	0.87868	50.4192	3.43969e-21	6.76498e-19
PRDM8	-1.54195	-1.66429	-0.122338	1.07346	50.2559	3.968e-21	7.73588e-19
TRIM69	1.51132	1.94686	0.435542	3.31709	50.2128	4.12063e-21	7.99851e-19
ZNF423	-0.892166	-1.74005	-0.847881	3.06052	49.9741	5.07794e-21	9.77176e-19
LOC102723360	1.39805	-1.26408	-2.66213	1.9213	49.896	5.43773e-21	1.04192e-18
UST	-0.479302	-1.40674	-0.927433	1.95796	49.8247	5.78784e-21	1.10427e-18
TUBB2A	-0.173853	-1.21418	-1.04033	4.40733	49.708	6.41105e-21	1.2128e-18
FAM20A	1.31085	1.40765	0.0967997	4.49816	49.5848	7.1418e-21	1.34534e-18
GABARAPL2	-0.871919	-1.72186	-0.849938	3.12974	49.2015	9.99532e-21	1.85934e-18
C9ORF84	0.206306	1.6296	1.4233	2.09223	49.1516	1.04428e-20	1.93451e-18
PLEKHM1P	-0.0953544	-1.42746	-1.33211	4.06124	49.0126	1.17969e-20	2.16738e-18
SLC4A4	-0.105102	-1.33751	-1.23241	1.00203	48.8039	1.41692e-20	2.59256e-18
EEF1DP2	0.981857	1.99447	1.01261	2.822	48.7927	1.43103e-20	2.60768e-18
LHFPL5	-1.43646	0.695786	2.13225	3.41016	48.6497	1.62252e-20	2.94462e-18
C8ORF88	1.29437	2.0493	0.754922	2.0038	48.5609	1.75421e-20	3.17071e-18
RBMY2CP	-1.21282	0.92726	2.14008	0.651307	48.5123	1.83072e-20	3.29566e-18
NXPE4	1.99936	1.96108	-0.0382776	2.0794	48.479	1.88502e-20	3.37979e-18
LOC105377203	-0.605725	1.46464	2.07037	2.83002	48.4162	1.99202e-20	3.55735e-18
PRYP4	0.0415525	1.46132	1.41977	2.48335	48.3621	2.08907e-20	3.70106e-18
NECAB1	1.13695	1.38451	0.247557	1.68598	47.9317	3.05065e-20	5.34103e-18
STAG3L3	-0.702207	-1.37443	-0.672225	3.72605	47.8966	3.14616e-20	5.48673e-18
ZFP36L2	1.00844	1.82518	0.81674	1.72418	47.769	3.5204e-20	6.1155e-18
BCYRN1	-0.955583	0.664614	1.6202	3.84712	47.6973	3.74968e-20	6.48855e-18
OLAH	1.77111	1.65333	-0.117781	2.78866	47.6187	4.01849e-20	6.92685e-18
STAG3L2	-0.691927	-1.25619	-0.564258	3.8534	47.5775	4.16694e-20	7.15511e-18
PFDN5	-0.392308	-1.2859	-0.89359	4.06655	47.532	4.33748e-20	7.41942e-18
SRP14	-0.429975	-1.45514	-1.02517	3.48893	47.4156	4.8057e-20	8.18896e-18
LOC105371179	1.81144	1.92395	0.11251	2.42715	47.3722	4.99348e-20	8.47658e-18
LOC105377374	2.01564	1.88466	-0.130974	2.0098	47.1013	6.34011e-20	1.06013e-17
BANP	1.06751	1.40183	0.334325	3.66935	47.095	6.37579e-20	1.06212e-17
LOC105369633	0.860057	1.46964	0.609584	3.17438	47.0014	6.92458e-20	1.14925e-17
SLC9B1P3	0.676535	2.23382	1.55729	2.58217	46.8954	7.60342e-20	1.25724e-17
OFD1P7Y	0.736437	1.72502	0.988581	0.865177	46.8803	7.70497e-20	1.26933e-17
LINC00314	-1.20058	-2.11086	-0.910278	1.6998	46.7844	8.38547e-20	1.36631e-17
PPIA	-0.73666	-1.17157	-0.434912	4.18741	46.5127	1.06589e-19	1.73043e-17
COL6A6	1.31842	2.00469	0.686267	2.68336	46.5085	1.06992e-19	1.73067e-17
LOC101928556	0.44462	-0.755664	-1.20028	4.34186	46.4552	1.12145e-19	1.80748e-17
C2ORF88	0.500897	1.28552	0.784623	3.75785	46.4105	1.16661e-19	1.8735e-17
GLCE	-1.1013	-1.46007	-0.358768	3.25352	46.3946	1.18313e-19	1.89322e-17
NPIPA8	0.29079	1.45509	1.1643	2.53012	46.2553	1.33817e-19	2.13366e-17
ABHD12B	-0.0128909	-1.36645	-1.35356	4.24337	46.1428	1.47801e-19	2.34825e-17
CORIN	1.69699	1.72201	0.0250129	3.45045	46.0576	1.59374e-19	2.51423e-17
PRYP3	0.109862	1.43798	1.32811	2.5246	45.894	1.84178e-19	2.88513e-17
LOC105379255	0.350505	1.41938	1.06887	4.06468	45.8556	1.9054e-19	2.97435e-17
LOC105372321	1.28068	1.55675	0.276068	3.78378	45.5547	2.4869e-19	3.86855e-17
TMEM41A	-0.0633373	-1.29383	-1.23049	4.36304	45.5142	2.57767e-19	3.99583e-17
AHNAK2	1.18025	-0.713984	-1.89424	4.63341	45.4847	2.64597e-19	4.07395e-17
SLIT3	-1.42578	-1.4658	-0.040017	4.36507	45.4806	2.65544e-19	4.07395e-17
NPIPA7	0.448337	1.39616	0.947826	2.74847	45.3003	3.11533e-19	4.76314e-17
LOC105373377	-2.69306	-1.13709	1.55596	1.6679	45.2782	3.17702e-19	4.84089e-17
SCHLAP1	-0.787137	0.450704	1.23784	3.71945	45.2243	3.33246e-19	5.06047e-17
EIF1B	-0.223634	-1.58443	-1.3608	3.53973	45.2038	3.39347e-19	5.13564e-17
KCNIP4-IT1	0.272962	-0.899378	-1.17234	4.6113	45.1325	3.61464e-19	5.45187e-17
RBMY2DP	-1.13825	0.897385	2.03564	0.616273	45.106	3.70051e-19	5.5626e-17
KCND3	0.139856	-1.09757	-1.23742	4.38822	45.0687	3.82522e-19	5.73076e-17
LOC105372730	-2.37589	-0.794384	1.58151	3.20312	45.0009	4.06203e-19	6.06519e-17
NSFP1	-1.20226	0.438457	1.64072	4.16254	44.9868	4.11304e-19	6.12089e-17
LOC105376253	1.68395	1.79264	0.108688	2.13278	44.9033	4.42911e-19	6.56935e-17
SLC9B1P2	0.437836	2.16886	1.73102	2.39079	44.6804	5.3977e-19	7.92698e-17
OR8G5	-1.57175	-2.08586	-0.514112	2.30418	44.5802	5.8995e-19	8.63552e-17
LOC105377610	1.45062	1.54556	0.0949453	0.614013	44.5742	5.9311e-19	8.6534e-17
DPH6-AS1	0.813336	1.77201	0.958672	2.47063	44.4773	6.46359e-19	9.39957e-17
LOC105379441	0.339673	1.9131	1.57343	2.58	44.4606	6.56036e-19	9.50932e-17
CREB5	-2.04938	-0.720631	1.32875	2.02728	44.426	6.76493e-19	9.77411e-17
LINC00643	-0.643635	0.851514	1.49515	2.97586	44.3844	7.01976e-19	1.01096e-16
LOC101927121	-2.46446	-1.45713	1.00733	2.50955	44.2886	7.6429e-19	1.09124e-16
BACH2	-1.26035	-1.19671	0.0636433	3.4087	44.0852	9.15713e-19	1.29373e-16
GPC6	-1.68933	-0.0984107	1.59091	0.833744	44.0648	9.32474e-19	1.31326e-16
TNS3	-0.153414	-1.48381	-1.3304	3.37652	43.9654	1.0186e-18	1.43005e-16
LOC729737	0.868914	-1.62675	-2.49566	2.81991	43.9558	1.02732e-18	1.43777e-16
LOC728138	1.75164	1.97149	0.219854	2.30453	43.5684	1.44981e-18	2.00393e-16
NR4A3	1.76218	1.78271	0.0205271	1.74948	43.3687	1.73182e-18	2.37899e-16
LOC101929373	0.723141	2.15893	1.43579	2.81717	43.3601	1.74513e-18	2.38992e-16
LOC101930090	-2.32992	-0.384805	1.94511	2.26735	43.0149	2.37354e-18	3.24058e-16
LOC105376919	0.947566	1.50906	0.561497	1.0165	42.8956	2.63959e-18	3.59282e-16
MTCO1P2	1.99311	1.48918	-0.503929	1.74221	42.8635	2.7163e-18	3.686e-16
SPARCL1	1.79916	0.940665	-0.858497	4.30028	42.8476	2.75519e-18	3.72744e-16
LOC105372587	-0.328581	1.33821	1.66679	2.92739	42.5112	3.71894e-18	5.01608e-16
LOC101927588	1.52097	1.07134	-0.449628	4.69865	42.4751	3.84084e-18	5.14957e-16
CDH22	0.213273	-1.34779	-1.56106	1.13024	42.475	3.84099e-18	5.14957e-16
AXIN2	-0.63866	-1.91243	-1.27377	2.15653	42.4055	4.08673e-18	5.45256e-16
TBK1	-0.762589	-1.15338	-0.390786	4.37314	42.4043	4.09141e-18	5.45256e-16
MYL6	-0.361873	-1.06333	-0.70146	4.26548	42.3968	4.11882e-18	5.47276e-16
LOC105375103	0.205556	-1.94833	-2.15388	1.67679	42.3624	4.24702e-18	5.62618e-16
CDC123	0.0299733	-1.48663	-1.5166	3.516	42.3591	4.25949e-18	5.62618e-16
RNU4ATAC	-1.21939	0.851442	2.07084	1.19044	42.3187	4.41618e-18	5.81594e-16
SLC9B1P4	0.654446	2.13648	1.48204	2.32546	42.2658	4.62952e-18	6.07897e-16
CLMP	-0.357275	-1.0171	-0.659828	5.07436	42.181	4.99379e-18	6.51894e-16
TECR	-0.794097	-1.64227	-0.848176	2.32713	42.1744	5.0233e-18	6.53834e-16
MTND2P28	1.5608	1.18053	-0.380272	3.01408	42.0203	5.76435e-18	7.43785e-16
OSBPL3	1.54852	0.0145183	-1.534	4.27251	41.9801	5.97518e-18	7.68766e-16
GAPDHP45	0.866452	1.93807	1.07161	1.22026	41.9283	6.25832e-18	8.02881e-16
SCG5	-0.0746571	-1.13881	-1.06415	3.62204	41.8279	6.84605e-18	8.73263e-16
TRNL1	1.36552	1.37635	0.0108228	1.85303	41.7309	7.46588e-18	9.49613e-16
LOC105377243	-1.14476	1.11701	2.26177	2.737	41.4652	9.46862e-18	1.20093e-15
FAM86DP	-0.728191	-1.91223	-1.18404	1.55844	41.3844	1.01782e-17	1.28727e-15
LOC105375102	0.190214	-1.85686	-2.04707	1.68273	41.3671	1.03367e-17	1.30362e-15
CYP4F11	-0.987476	0.82807	1.81555	1.77704	41.3201	1.07806e-17	1.35577e-15
LOC100288152	2.72381	1.36635	-1.35746	2.88778	41.2624	1.13529e-17	1.42373e-15
PTK7	-0.609044	-1.69843	-1.08939	3.52425	41.2455	1.15254e-17	1.44133e-15
GPC5	-1.29058	-1.79678	-0.506195	3.76081	41.1153	1.29502e-17	1.606e-15
NUP210L	1.52271	1.57868	0.0559766	1.67447	41.0096	1.42354e-17	1.76049e-15
ACTN2	0.0201895	1.31489	1.2947	2.44824	40.9822	1.4589e-17	1.79733e-15
TSPAN9	-0.452261	-1.11455	-0.662289	4.82489	40.9803	1.46138e-17	1.79733e-15
LOC101927376	1.57203	1.93128	0.35925	2.45059	40.0816	3.27161e-17	3.99074e-15
GOLT1A	-1.42669	-2.05986	-0.633172	2.11602	40.0281	3.43259e-17	4.17569e-15
NXPE1	1.41185	1.85347	0.441615	2.57411	40.0163	3.46931e-17	4.2089e-15
FAM92B	-1.00083	1.19438	2.1952	2.29194	39.8893	3.88827e-17	4.70438e-15
BRINP2	-0.353586	-1.1727	-0.819113	4.28721	39.7479	4.41502e-17	5.28441e-15
RNF34	0.0279329	-1.27508	-1.30302	3.77935	39.7324	4.4768e-17	5.34403e-15
MYO16	1.27522	-0.454262	-1.72948	3.93291	39.5004	5.51511e-17	6.54846e-15
UBE2N	0.0578204	-1.22787	-1.28569	3.85653	39.4916	5.55874e-17	6.574e-15
SYT9	0.549434	-1.2602	-1.80963	2.26015	39.4901	5.56607e-17	6.574e-15
KCNB2	-2.58307	-0.253917	2.32915	1.78705	39.4274	5.88894e-17	6.91873e-15
DNM1P49	-0.321017	1.10891	1.42993	3.31166	39.298	6.616e-17	7.71204e-15
LOC105371133	0.529319	-0.651238	-1.18056	4.36461	39.2172	7.11486e-17	8.27195e-15
ASAH1	-1.17936	-1.10334	0.0760208	3.75871	39.0777	8.06608e-17	9.35351e-15
SLC6A1	-1.01117	0.132606	1.14377	0.681169	39.0579	8.21122e-17	9.49715e-15
MTERF2	-0.661326	-1.7603	-1.09897	2.90935	39.0294	8.42454e-17	9.69365e-15
C12ORF77	-0.685618	1.08127	1.76689	3.28281	38.9283	9.22716e-17	1.05899e-14
LOC102724455	-1.77979	-1.40646	0.373333	3.69578	38.8953	9.50565e-17	1.08815e-14
LOC102724036	0.296332	-1.67053	-1.96686	1.89095	38.8678	9.74429e-17	1.11196e-14
TLL1	-0.013064	-1.37517	-1.36211	4.38627	38.8023	1.03363e-16	1.17123e-14
DUXAP10	-1.01671	-1.50185	-0.485141	1.8539	38.7282	1.10494e-16	1.24257e-14
LOC105378114	2.49929	1.56852	-0.930771	3.20212	38.6889	1.14477e-16	1.28091e-14
RPL3	-0.353021	-1.72627	-1.37325	2.60436	38.6722	1.16215e-16	1.2971e-14
TRIM22	-0.937456	0.110168	1.04762	0.235834	38.6204	1.2177e-16	1.35571e-14
LOC105377554	1.54621	1.88083	0.334621	2.7269	38.6147	1.22394e-16	1.35928e-14
MAP1LC3B	0.0425057	-1.21851	-1.26102	3.97242	38.55	1.29743e-16	1.43022e-14
SLC9B1P1	0.950045	2.12991	1.17987	2.02909	38.4855	1.37505e-16	1.51204e-14
COX20P1	0.264896	-1.6719	-1.93679	1.88199	38.3557	1.54582e-16	1.69565e-14
LOC105378486	0.192968	1.36523	1.17226	1.08944	38.2593	1.68627e-16	1.83619e-14
KRT8P16	-0.549629	0.842432	1.39206	3.81342	38.1764	1.81709e-16	1.97382e-14
THYN1	-1.378	-1.71091	-0.332918	3.27124	37.9791	2.17124e-16	2.34709e-14
NPAS4	1.33363	1.86756	0.53393	1.11173	37.922	2.28614e-16	2.46533e-14
LOC101926982	-0.755533	0.689613	1.44515	3.32435	37.8653	2.4062e-16	2.57966e-14
EFTUD2	0.632464	-1.2226	-1.85507	3.52895	37.8638	2.40949e-16	2.57966e-14
PKD1P4	0.920337	-0.199008	-1.11935	4.85135	37.8046	2.54181e-16	2.71482e-14
GALNT14	-0.655053	-1.00008	-0.34503	4.12636	37.6091	3.03249e-16	3.22346e-14
H2AFZ	-0.739233	-1.60774	-0.868511	3.23913	37.5755	3.12616e-16	3.31514e-14
LOC100505715	-0.734994	-1.37672	-0.641729	4.04552	37.4697	3.43958e-16	3.6217e-14
FRMPD1	-0.395383	-1.51391	-1.11853	3.79417	37.0591	4.98608e-16	5.20101e-14
RERG	-0.407038	1.43244	1.83948	2.62182	37.0354	5.09435e-16	5.30157e-14
GART	-0.331202	-1.40444	-1.07324	3.55993	36.9565	5.4712e-16	5.66732e-14
IFT43	-0.209537	-1.16446	-0.954927	4.11232	36.9293	5.60738e-16	5.79495e-14
SPCS1	-0.154116	-1.54966	-1.39554	2.83192	36.8932	5.79379e-16	5.95999e-14
RNU6-9	-0.18616	1.58255	1.76871	1.43144	36.8311	6.12907e-16	6.2904e-14
SKAP1	-0.578599	-1.84769	-1.2691	3.42715	36.8247	6.1643e-16	6.31204e-14
LOC105379253	-0.397606	1.5185	1.91611	2.85709	36.6567	7.17716e-16	7.33236e-14
FRRS1L	0.534104	-1.07825	-1.61235	3.43045	36.6394	7.29056e-16	7.41429e-14
MTRNR2L2	1.75701	1.49634	-0.260664	1.39435	36.5604	7.83106e-16	7.92784e-14
C2ORF27A	-0.459868	-1.36967	-0.909806	4.06095	36.5516	7.89415e-16	7.97363e-14
LOC105373459	-0.796419	1.14743	1.94385	1.19355	36.4196	8.89724e-16	8.96653e-14
HAX1	-0.395582	-1.59143	-1.19585	3.02042	36.4115	8.96216e-16	9.01162e-14
HMGB1P5	-0.599484	-1.31185	-0.712367	3.30033	36.4022	9.03862e-16	9.06807e-14
BCAS2P1	0.556164	-0.485778	-1.04194	4.36811	36.3478	9.49556e-16	9.46271e-14
ARSFP1	0.0564535	1.05518	0.998728	3.56551	36.327	9.6761e-16	9.62114e-14
NLRP2	0.496295	-1.54983	-2.04612	1.43219	36.3159	9.77339e-16	9.69629e-14
PARD6G-AS1	2.08855	1.47384	-0.614711	3.13368	36.2755	1.0138e-15	1.00136e-13
VSNL1	0.337483	-1.14242	-1.4799	1.64562	36.2032	1.08247e-15	1.06447e-13
HCRTR2	0.197184	1.86532	1.66814	2.269	36.1975	1.08814e-15	1.06769e-13
H3F3B	-0.310116	-1.34789	-1.03777	2.16299	36.0401	1.25513e-15	1.22343e-13
LOC105369827	2.25265	1.75031	-0.502337	2.11138	35.9901	1.31331e-15	1.27462e-13
MTRNR2L1	2.02819	0.827086	-1.2011	2.7598	35.9835	1.32115e-15	1.27945e-13
LAMTOR5	-0.690091	-1.55077	-0.860679	3.61171	35.973	1.33388e-15	1.28898e-13
MAP1LC3A	-0.147255	-1.06497	-0.917713	4.42746	35.9336	1.38233e-15	1.33292e-13
LOC101927435	2.1136	0.814793	-1.29881	4.14082	35.9255	1.39263e-15	1.33996e-13
RBM19	1.29496	0.588349	-0.706608	4.69289	35.9014	1.42332e-15	1.36654e-13
P4HA1	0.51404	1.13936	0.625322	4.17963	35.8787	1.45303e-15	1.39207e-13
SLC9B1P5	0.759662	1.81507	1.05541	2.10872	35.8266	1.52339e-15	1.45636e-13
LOC105376585	-1.68121	-1.3094	0.37181	1.067	35.6858	1.73103e-15	1.6443e-13
ITPR1	0.134701	-1.0224	-1.1571	3.67861	35.6168	1.84294e-15	1.74688e-13
PTPN20CP	-2.0194	-1.044	0.975406	4.16435	35.5092	2.03221e-15	1.92221e-13
LOC105375548	0.48094	1.81701	1.33607	1.25837	35.4917	2.06468e-15	1.94879e-13
SNORD87	-0.768004	-1.71754	-0.949531	1.69987	35.4124	2.21906e-15	2.08569e-13
LOC102724610	-0.486793	-1.79348	-1.30668	2.47147	35.3558	2.33614e-15	2.18652e-13
RAN	-0.680172	-1.5419	-0.861723	3.31944	35.342	2.36562e-15	2.20948e-13
CPXM2	0.469701	-1.16789	-1.63759	3.9433	35.0835	2.99225e-15	2.78892e-13
LOC105371773	-1.35811	-0.0662092	1.2919	0.314125	35.0704	3.02789e-15	2.81626e-13
LOC105372759	-0.376569	-1.51037	-1.1338	0.897447	34.9338	3.42854e-15	3.17567e-13
ITGA11	-0.901438	0.67684	1.57828	2.25218	34.8984	3.54082e-15	3.27132e-13
BEND4	0.360507	1.51242	1.15191	1.12098	34.8966	3.54647e-15	3.27132e-13
SKP1	-0.68911	-1.10955	-0.42044	3.79189	34.8456	3.7149e-15	3.41962e-13
MTRNR2L3	1.34976	1.18295	-0.166816	2.23096	34.7794	3.9459e-15	3.61735e-13
LENG9	0.0634424	1.35747	1.29403	2.48141	34.7732	3.96801e-15	3.63016e-13
LOC653453	-1.60229	-1.57209	0.0301923	1.31087	34.6155	4.58062e-15	4.16116e-13
LOC100419932	-0.144764	0.978429	1.12319	3.65829	34.6143	4.58571e-15	4.16116e-13
G6PC	-0.422634	0.891034	1.31367	3.73883	34.594	4.671e-15	4.22995e-13
NGFRAP1	-0.660887	-1.14378	-0.482898	3.97412	34.5475	4.87329e-15	4.39531e-13
OR51B5	-1.76775	0.122495	1.89024	1.06319	34.5322	4.94166e-15	4.448e-13
HSPA8	-0.377899	-1.24274	-0.864845	3.39249	34.525	4.97415e-15	4.46578e-13
CALD1	1.16536	-0.37595	-1.54131	3.49633	34.5234	4.98143e-15	4.46578e-13
LOC643770	-0.0511763	0.998185	1.04936	3.78057	34.5058	5.06171e-15	4.5196e-13
LOC105373848	2.05915	1.54166	-0.517488	2.16742	34.4715	5.2223e-15	4.65368e-13
RHBG	-1.1372	0.758927	1.89613	2.9402	34.4427	5.36101e-15	4.76778e-13
MTRNR2L12	1.88632	1.27443	-0.611886	1.65536	34.3914	5.61765e-15	4.97619e-13
LOC105377564	-1.42119	-1.70365	-0.28246	1.32403	34.3594	5.78362e-15	5.11307e-13
LOC105370315	-1.33774	-1.91566	-0.577914	2.83583	34.2866	6.18074e-15	5.44259e-13
SLC1A1	0.121625	-1.27478	-1.39641	3.23946	34.2592	6.33655e-15	5.56677e-13
NPIPB3	0.906451	-0.539533	-1.44598	3.98227	34.2348	6.47912e-15	5.67177e-13
TSPAN3	-0.255905	-1.36477	-1.10887	3.34473	34.2265	6.52866e-15	5.70395e-13
LOC101929767	0.626569	1.04979	0.423221	4.30051	34.216	6.59094e-15	5.74712e-13
LOC102725258	1.73664	1.65766	-0.0789769	2.0818	34.2059	6.65195e-15	5.78901e-13
LOC728195	-1.56796	-1.57407	-0.0061093	1.34451	34.1536	6.97724e-15	6.06029e-13
LOC105378575	1.15918	-1.26926	-2.42844	2.2022	34.1496	7.00273e-15	6.07062e-13
TIAM2	-0.0520772	-1.21804	-1.16596	4.31541	34.0152	7.9151e-15	6.84825e-13
LINC01583	-1.73506	-0.0370124	1.69805	0.513008	33.976	8.20346e-15	7.07034e-13
LOC102723839	2.12361	1.28782	-0.835799	3.09679	33.9622	8.30709e-15	7.14585e-13
FAM3C2	0.685981	-1.44602	-2.132	2.1931	33.9124	8.69317e-15	7.46359e-13
PTPN20	-1.3716	-0.750463	0.621132	4.68258	33.9103	8.71e-15	7.46369e-13
LOC105376049	0.34038	1.23722	0.896838	4.09687	33.8717	9.0218e-15	7.7013e-13
LGALS9	1.43065	1.33017	-0.100477	0.828685	33.8352	9.32783e-15	7.93221e-13
PARP2	-1.24853	-1.5532	-0.304671	2.9943	33.7214	1.03476e-14	8.74939e-13
LOC285762	-0.124871	1.18526	1.31013	2.94257	33.7083	1.04726e-14	8.83836e-13
POMP	-0.902732	-1.46969	-0.566956	3.45757	33.626	1.12898e-14	9.51008e-13
LOC105378582	1.22931	0.860903	-0.368407	4.23455	33.5312	1.23095e-14	1.033e-12
RABGGTB	-0.834124	-1.57948	-0.745351	3.29051	33.4394	1.33868e-14	1.11295e-12
HMGB1	-0.606299	-1.0008	-0.3945	3.60664	33.4092	1.37604e-14	1.14188e-12
RNU6-2	-0.1339	1.5188	1.6527	1.43508	33.34	1.46588e-14	1.21193e-12
LOC105378146	-1.87285	0.136583	2.00943	1.0973	33.3094	1.50738e-14	1.23935e-12
LOC102723917	1.2885	0.931254	-0.357249	4.26357	33.2175	1.63948e-14	1.33811e-12
LOC400661	-1.4706	0.700468	2.17107	1.47102	33.1231	1.7871e-14	1.45328e-12
PPIAP22	-0.633294	-1.01506	-0.381768	4.18214	33.1066	1.81421e-14	1.46997e-12
CPA6	1.6289	1.56335	-0.0655477	1.81739	33.0696	1.8767e-14	1.51785e-12
SNCB	0.204359	-0.948854	-1.15321	4.10195	32.9864	2.02492e-14	1.63182e-12
SLC26A3	0.890445	1.39454	0.504091	1.77524	32.8999	2.19171e-14	1.75987e-12
LOC105373437	0.682855	-1.20873	-1.89159	1.20087	32.8503	2.29337e-14	1.83658e-12
C9ORF24	1.03301	1.14826	0.115244	3.97304	32.8493	2.29547e-14	1.83658e-12
C18ORF32	-0.82539	-1.32507	-0.499677	3.59507	32.8178	2.3626e-14	1.88102e-12
CD24P4	-0.206424	0.973826	1.18025	3.15421	32.8081	2.38369e-14	1.89359e-12
TMPRSS7	0.577446	1.44115	0.863708	1.21159	32.7757	2.45525e-14	1.94352e-12
LOC105371759	1.28091	1.34249	0.0615788	0.683389	32.7264	2.56862e-14	2.02608e-12
LOC647503	1.31657	1.3177	0.00112467	0.57523	32.659	2.73202e-14	2.1436e-12
GPR137C	-1.58205	-0.793041	0.789009	3.48432	32.6539	2.74475e-14	2.14982e-12
LOC654338	-0.964131	1.03773	2.00186	2.26771	32.4957	3.17256e-14	2.46329e-12
FOXH1	0.510464	1.65867	1.14821	2.49047	32.4848	3.20427e-14	2.48358e-12
UBE2V1	0.103747	-0.926544	-1.03029	4.1626	32.4128	3.42265e-14	2.64825e-12
LOC105375508	1.94142	1.42758	-0.513841	2.69703	32.3744	3.54497e-14	2.73815e-12
LINC01115	-0.0036485	1.4638	1.46744	1.34432	32.3125	3.75189e-14	2.88302e-12
TRBC2	-1.19873	-1.92234	-0.723607	3.11263	32.2864	3.84268e-14	2.94771e-12
LOC105373480	0.284042	1.28837	1.00433	0.720117	32.2827	3.85573e-14	2.95264e-12
AGAP9	-1.48309	-1.13604	0.347047	3.70924	32.2566	3.94911e-14	3.01381e-12
MTND1P23	1.0868	1.30283	0.216024	0.986984	32.2252	4.06434e-14	3.09119e-12
SGOL1	0.727261	1.03427	0.307007	3.24225	32.2173	4.09366e-14	3.10819e-12
UNC45B	1.05883	0.106094	-0.952739	3.54212	32.1973	4.16959e-14	3.16046e-12
PSMD12	0.158497	-1.25938	-1.41787	3.67047	32.0976	4.56821e-14	3.44506e-12
LOC105371200	-1.22432	0.178918	1.40324	0.376071	32.0708	4.68188e-14	3.52483e-12
SAMD5	1.69447	0.383501	-1.31097	2.83592	31.9814	5.08155e-14	3.81287e-12
LOC105379262	0.441315	1.24611	0.804799	3.95584	31.9645	5.16114e-14	3.86609e-12
HSPA1A	1.26276	1.11817	-0.144589	1.4776	31.8786	5.58407e-14	4.16891e-12
TTC4	-0.153149	-1.46366	-1.31051	2.37287	31.8282	5.84785e-14	4.35855e-12
ITGB1BP1	0.459539	-0.641383	-1.10092	4.70714	31.7785	6.12098e-14	4.55452e-12
KCNJ6	0.157841	-1.03617	-1.19401	3.90548	31.7059	6.54195e-14	4.84354e-12
OSGEP	-0.747508	-1.47679	-0.729281	3.39964	31.6499	6.88723e-14	5.09074e-12
LOC105373795	1.01248	1.72756	0.715089	1.87003	31.4852	8.0111e-14	5.89219e-12
PYROXD2	0.412551	1.60063	1.18808	2.00379	31.472	8.10842e-14	5.95395e-12
DNMT3L	1.17349	1.32283	0.149344	0.676883	31.4692	8.12905e-14	5.9593e-12
LOC105371758	1.35171	1.32732	-0.0243979	0.704336	31.4384	8.36269e-14	6.12053e-12
SNHG6	-0.925614	-1.43142	-0.505801	2.92451	31.4159	8.53686e-14	6.23778e-12
ACTG1	0.101624	-1.02632	-1.12795	3.60185	31.4036	8.63396e-14	6.29842e-12
DRAP1	-0.615639	-1.51195	-0.896307	3.23295	31.2875	9.60495e-14	6.99532e-12
NHLRC3	-0.485218	-1.21471	-0.729497	3.26936	31.2728	9.73537e-14	7.07875e-12
ADAMTS5	-0.410471	-1.59835	-1.18788	1.66482	31.2258	1.01653e-13	7.37938e-12
C1ORF162	0.61698	1.60689	0.989913	2.94522	31.1124	1.12816e-13	8.14993e-12
DYDC1	-0.631429	0.931306	1.56274	2.62889	31.075	1.16754e-13	8.40722e-12
STMN1	-0.188217	-1.01807	-0.829851	2.81738	31.0511	1.19354e-13	8.53932e-12
ZNF503-AS1	-0.336494	-1.67529	-1.3388	2.20689	31.022	1.22579e-13	8.75607e-12
HIGD1C	0.8342	1.5862	0.752002	2.85662	30.9609	1.29659e-13	9.24703e-12
BCYRN1P3	-1.0424	0.911859	1.95426	2.54316	30.9504	1.30916e-13	9.32176e-12
NCS1	0.753422	-0.457815	-1.21124	4.63769	30.9336	1.32958e-13	9.45208e-12
ST6GAL2	-1.28078	-1.28322	-0.00243749	3.54695	30.9296	1.3345e-13	9.472e-12
GPR12	0.0534921	-1.34554	-1.39904	3.4435	30.8844	1.39116e-13	9.82725e-12
GYG2	-0.383389	1.1505	1.53389	1.45387	30.8648	1.41642e-13	9.98988e-12
LOC105370732	1.0315	1.48495	0.453456	3.25587	30.8325	1.45909e-13	1.02584e-11
RN7SL1	0.600789	1.14579	0.545004	3.48724	30.818	1.47865e-13	1.03633e-11
SNRNP70	1.05068	0.50113	-0.549555	4.09596	30.7701	1.54529e-13	1.08134e-11
MYL12B	0.304504	-1.23623	-1.54073	3.61987	30.7162	1.62376e-13	1.13093e-11
LOC102723769	-1.34875	-0.692393	0.656357	3.71388	30.6217	1.77118e-13	1.22786e-11
LOC100506860	1.54466	1.26602	-0.27864	3.62428	30.5814	1.83809e-13	1.27227e-11
ARTN	-0.302372	-1.78174	-1.47936	3.27758	30.3707	2.23155e-13	1.53746e-11
LOC101926942	0.671069	-1.30751	-1.97858	2.9868	30.2716	2.44466e-13	1.68169e-11
FRMPD2B	1.31663	1.52258	0.205947	1.04403	30.2342	2.53041e-13	1.73533e-11
LOC105375844	0.326939	-1.43902	-1.76595	1.38633	30.2016	2.60732e-13	1.7826e-11
PIGY	8.45436e-06	-1.496	-1.49601	2.86592	30.1659	2.69448e-13	1.83937e-11
GPS2P1	0.836453	1.15911	0.322659	0.469287	30.1613	2.70596e-13	1.84439e-11
OR8A1	-0.867413	-1.67904	-0.811625	1.89897	30.1079	2.84234e-13	1.93145e-11
DRD2	0.0554306	-1.68349	-1.73892	2.439	30.0872	2.89716e-13	1.96571e-11
LINC01193	-0.614946	-1.78562	-1.17067	1.88861	30.051	2.99548e-13	2.02933e-11
ALDOA	-0.191137	-1.01486	-0.823727	3.93892	30.0427	3.01834e-13	2.04067e-11
PSMG1	-0.432302	-1.66554	-1.23324	2.34022	30.0053	3.12431e-13	2.10384e-11
CYP3A4	0.957966	1.52146	0.563493	1.5283	29.996	3.15107e-13	2.11866e-11
KRT16P6	-1.35432	-1.80392	-0.449608	3.79885	29.975	3.21276e-13	2.1569e-11
LOC105370882	-0.60555	-1.84138	-1.23583	2.85529	29.9668	3.23702e-13	2.16992e-11
NDUFV2P1	-1.20134	-1.69758	-0.496239	2.46712	29.9276	3.3563e-13	2.24026e-11
CYBRD1	-0.948335	-1.43057	-0.482232	3.35981	29.9016	3.43762e-13	2.29064e-11
LOC105374990	0.798388	-1.30157	-2.09995	2.12216	29.8826	3.49828e-13	2.32758e-11
RWDD1	-0.443588	-1.34862	-0.905032	3.50839	29.8035	3.76304e-13	2.48522e-11
LOC105379428	-2.23963	-1.08914	1.15049	1.90041	29.779	3.84883e-13	2.53438e-11
CNPY2	0.14687	-1.07778	-1.22465	3.63436	29.7677	3.88929e-13	2.55725e-11
LOC105375634	0.675073	1.12542	0.450349	1.43966	29.7258	4.04223e-13	2.65391e-11
LOC105379514	-0.0289884	-1.54753	-1.51854	1.38829	29.718	4.07161e-13	2.66927e-11
AXDND1	-1.14349	0.778259	1.92175	1.76183	29.7043	4.12349e-13	2.69931e-11
MSH4	1.39682	1.42627	0.0294569	3.44225	29.6703	4.25472e-13	2.78114e-11
LOC105374664	1.71973	1.69988	-0.0198533	2.10988	29.6592	4.29843e-13	2.8056e-11
LOC102724689	-0.673357	-1.71833	-1.04497	2.8033	29.5433	4.78363e-13	3.11319e-11
CLVS2	0.271988	-1.0639	-1.33589	3.67216	29.5358	4.81651e-13	3.13003e-11
LOC105376484	-0.73143	0.988438	1.71987	3.35298	29.46	5.16549e-13	3.34708e-11
HSPA1B	1.13727	1.20364	0.0663693	1.5076	29.4298	5.31159e-13	3.43675e-11
LOC105376839	1.93157	1.54375	-0.387821	2.82254	29.4161	5.37895e-13	3.4753e-11
MIR3064	-0.983834	-1.50854	-0.524707	2.07844	29.4055	5.43221e-13	3.49958e-11
TMEM59	-0.110828	-1.0799	-0.969073	2.63163	29.3898	5.5114e-13	3.54548e-11
NOX5	-1.51645	0.609398	2.12585	1.27622	29.3481	5.72746e-13	3.67389e-11
COL11A1	-1.62763	-1.21443	0.413199	1.38089	29.3267	5.84167e-13	3.73106e-11
SCNM1	-0.628208	-1.61136	-0.983148	3.19116	29.3007	5.98346e-13	3.81072e-11
NPTX1	1.86241	1.20414	-0.658271	1.11208	29.2731	6.13838e-13	3.90382e-11
RNU6-6P	-0.133221	1.43818	1.5714	1.48258	29.2301	6.38643e-13	4.05579e-11
NBPF2P	0.23129	1.00076	0.769471	4.22797	29.1943	6.60153e-13	4.17458e-11
KCNG2	1.18249	1.31518	0.132687	1.29732	29.1163	7.0946e-13	4.47371e-11
ZNF667-AS1	-0.658437	-1.51382	-0.855378	2.82893	29.08	7.33623e-13	4.61955e-11
OR2A1	1.86155	1.66516	-0.196388	1.88582	29.0611	7.46519e-13	4.69414e-11
LOC105372488	-0.447506	-1.41352	-0.966016	3.06118	29.0563	7.49858e-13	4.7085e-11
FAM138F	-1.08685	0.848372	1.93522	1.93647	29.054	7.51489e-13	4.71211e-11
ADH4	-0.0644427	1.15923	1.22367	3.12037	28.9322	8.40966e-13	5.25104e-11
ABCC8	1.49261	0.698015	-0.794591	4.51369	28.8787	8.83578e-13	5.5094e-11
GPR65	-0.44326	0.62648	1.06974	3.48301	28.8757	8.86039e-13	5.51705e-11
DHDDS	0.414958	-0.685873	-1.10083	4.60875	28.8146	9.37515e-13	5.81324e-11
LRRC16A	-0.703964	-1.29082	-0.586856	2.9056	28.8085	9.42807e-13	5.83795e-11
LOC105375509	1.59214	1.43603	-0.15611	1.74066	28.7571	9.88685e-13	6.09666e-11
ZNF502	-0.651314	-1.60988	-0.958562	1.42219	28.7455	9.99346e-13	6.1539e-11
RPL26	-0.555622	-1.53237	-0.976744	2.41125	28.7195	1.02371e-12	6.29522e-11
MVD	1.45809	1.04918	-0.408909	3.8007	28.6879	1.05398e-12	6.46379e-11
ST8SIA6	1.61463	0.744265	-0.870366	3.9754	28.6879	1.05401e-12	6.46379e-11
FAM138A	-1.08677	0.837205	1.92398	1.94085	28.679	1.0627e-12	6.5081e-11
NRXN3	-1.02786	-0.42639	0.60147	2.46923	28.565	1.18086e-12	7.21195e-11
NEDD8	-0.936954	-1.28615	-0.349195	3.54034	28.5577	1.18886e-12	7.25089e-11
IMPA2	0.208028	-1.60629	-1.81431	2.56007	28.5378	1.21093e-12	7.37544e-11
ANO8	0.656142	1.26951	0.613368	3.50409	28.5109	1.24147e-12	7.55117e-11
PLA2G7	-0.763889	-1.7469	-0.983007	2.28539	28.5044	1.24893e-12	7.58617e-11
LOC105369630	-0.11643	1.25214	1.36857	1.49409	28.4373	1.32895e-12	8.01768e-11
SRSF7	-0.801319	-1.16173	-0.360413	3.92384	28.3226	1.47775e-12	8.87944e-11
LOC105378573	-0.0641962	-1.55897	-1.49477	2.4902	28.2872	1.52705e-12	9.16334e-11
RBMY2BP	-1.02046	0.714598	1.73506	0.983898	28.232	1.60705e-12	9.59179e-11
IQCB1	-0.248514	-1.10302	-0.854511	3.62545	28.2257	1.61644e-12	9.63497e-11
CLEC4GP1	-1.70227	-0.188775	1.51349	3.74966	28.2029	1.65094e-12	9.81443e-11
CCT2	-0.370662	-1.23302	-0.862361	3.5936	28.1179	1.78618e-12	1.05621e-10
LOC105376922	1.19341	1.12862	-0.0647882	0.561749	28.1039	1.80939e-12	1.06852e-10
VTRNA1-3	-2.38372	0.0352688	2.41899	2.28023	28.0622	1.88068e-12	1.10916e-10
LOC100996432	-0.941862	0.9361	1.87796	2.15476	28.0309	1.93592e-12	1.14022e-10
TMEM191B	1.40515	-0.817137	-2.22229	3.35693	27.9289	2.12774e-12	1.24826e-10
LSMEM1	1.75596	1.5407	-0.215256	2.69079	27.907	2.17148e-12	1.27226e-10
HACL1	-0.866712	-1.40371	-0.537002	3.17686	27.893	2.1997e-12	1.28542e-10
PLEKHJ1	0.24982	-1.39291	-1.64273	3.2472	27.8455	2.29868e-12	1.3415e-10
PPP1R2	-0.309282	-1.29285	-0.983573	3.14802	27.8282	2.33589e-12	1.35966e-10
LOC105376052	-0.231578	1.42607	1.65765	2.54503	27.7845	2.43241e-12	1.414e-10
PSMC6	-0.49403	-1.16733	-0.673299	3.82105	27.7549	2.50019e-12	1.44774e-10
SLC7A2	-0.654495	-1.45816	-0.803662	2.65156	27.7511	2.50887e-12	1.45089e-10
LOC101928100	1.21154	1.05112	-0.160424	0.644832	27.7205	2.58103e-12	1.49069e-10
LOC105373358	0.277516	1.16053	0.88301	0.729129	27.7101	2.60622e-12	1.50329e-10
CYP39A1	1.73165	1.53338	-0.198271	2.07911	27.6873	2.66189e-12	1.53342e-10
CCDC40	1.74188	1.31017	-0.431705	3.17706	27.6845	2.66868e-12	1.53535e-10
SNRNP25	-1.03744	-1.5709	-0.533453	3.3947	27.6669	2.71255e-12	1.55858e-10
HAP1	-1.50601	-1.63455	-0.128541	3.15561	27.6523	2.74963e-12	1.57786e-10
PCED1B	1.0003	0.83894	-0.161361	0.536464	27.5691	2.96998e-12	1.69559e-10
SNORD13	-0.508263	0.980361	1.48862	1.3513	27.5098	3.13811e-12	1.78473e-10
PSMD13	0.4896	-1.03495	-1.52456	3.58433	27.5023	3.15992e-12	1.79484e-10
OCM	1.00257	1.62777	0.625199	2.25018	27.4786	3.23012e-12	1.83006e-10
TLL2	-0.862389	0.64226	1.50465	1.73732	27.3991	3.47743e-12	1.96023e-10
LOC100289371	1.06547	1.2447	0.179232	0.979607	27.3005	3.81042e-12	2.14071e-10
MYEOV2	-0.48569	-1.13275	-0.647059	3.98791	27.2926	3.8387e-12	2.153e-10
LPAL2	-1.02215	0.610847	1.633	2.74938	27.2684	3.92585e-12	2.1948e-10
LINC01010	-0.332562	1.11233	1.44489	2.54599	27.2678	3.92798e-12	2.1948e-10
LOC101927305	-0.422016	1.03279	1.4548	3.37413	27.1853	4.24047e-12	2.3576e-10
FAM138C	-1.20408	0.83757	2.04165	2.10213	27.1784	4.26784e-12	2.36785e-10
NXPE2	1.34082	1.52821	0.187394	1.49315	27.178	4.26951e-12	2.36785e-10
TUBA4A	-0.309004	-1.25102	-0.942013	3.92077	27.1686	4.30674e-12	2.38554e-10
GPC5-AS1	-0.757258	-1.75163	-0.994372	2.10837	27.1653	4.31992e-12	2.38987e-10
REC114	0.811873	1.49186	0.679985	3.37345	27.1411	4.4183e-12	2.44127e-10
CCDC85B	-0.0877669	-1.37657	-1.2888	3.4329	27.1211	4.50106e-12	2.48393e-10
PHLDB2	-0.860369	-1.54304	-0.682673	3.65284	27.0899	4.63336e-12	2.55348e-10
RTCB	-0.311057	-1.30098	-0.989925	3.31243	27.0887	4.63854e-12	2.55348e-10
COPS4	-0.638445	-1.32013	-0.68169	3.38257	27.0557	4.78279e-12	2.62642e-10
PARPBP	-0.735535	-1.49684	-0.761308	1.55013	27.038	4.8618e-12	2.66325e-10
LOC105372910	0.726372	1.41051	0.684139	1.41399	27.0001	5.03633e-12	2.75211e-10
PLEKHD1	0.30799	-0.953981	-1.26197	4.39972	26.9822	5.1207e-12	2.79479e-10
MYO5B	-0.739313	-1.00681	-0.267501	4.78872	26.9639	5.20827e-12	2.83911e-10
L3MBTL3	1.47984	1.47329	-0.00655137	3.23864	26.8988	5.53316e-12	3.0052e-10
FDX1P1	0.983636	-0.22479	-1.20843	3.99764	26.8949	5.55305e-12	3.01234e-10
LOC105375256	2.07801	1.10693	-0.971086	2.67612	26.8581	5.74644e-12	3.10969e-10
SUB1	-0.159045	-1.06634	-0.907296	3.74616	26.7635	6.2743e-12	3.39123e-10
CCDC68	0.21189	-1.52861	-1.7405	2.2009	26.7559	6.31883e-12	3.41117e-10
UBE2V2	-0.574783	-1.14713	-0.572351	3.8997	26.7099	6.59465e-12	3.54721e-10
LOC105373612	0.949807	1.52672	0.576913	1.07062	26.6436	7.01376e-12	3.7681e-10
SLCO1C1	0.691426	1.47509	0.783663	3.17197	26.5138	7.91337e-12	4.22094e-10
ALKBH6	-0.319999	-1.24896	-0.928963	4.01958	26.4972	8.0364e-12	4.27955e-10
CPED1	-1.12033	-1.33534	-0.215006	3.76316	26.4964	8.04243e-12	4.27955e-10
CYLC2	-1.18933	0.121499	1.31083	0.479116	26.4789	8.17463e-12	4.34361e-10
LINC01527	-0.946238	0.096662	1.0429	0.295706	26.4779	8.18227e-12	4.34361e-10
LOC100499223	-0.284373	0.825279	1.10965	3.6982	26.4572	8.34097e-12	4.4226e-10
IDI2	-0.795709	-1.4612	-0.665488	3.58878	26.4515	8.38595e-12	4.44117e-10
IQCA1	0.555439	-0.91706	-1.4725	3.89651	26.3971	8.82061e-12	4.66031e-10
DCHS2	1.29355	1.24588	-0.0476677	1.24713	26.3667	9.07412e-12	4.78858e-10
LOC105379258	-0.492808	1.32505	1.81786	2.61687	26.3591	9.13833e-12	4.81109e-10
LOC105377484	0.0479511	-1.20082	-1.24878	3.62566	26.3407	9.29593e-12	4.8883e-10
DUXAP8	-1.16295	-1.04877	0.114182	1.21903	26.305	9.61014e-12	5.04165e-10
ATP6AP2	-0.334905	-1.16859	-0.833688	3.45969	26.2721	9.90866e-12	5.19216e-10
LOC101929547	0.414306	-1.50331	-1.91762	2.2597	26.2603	1.00179e-11	5.24327e-10
LOC100499484	-0.430839	-1.11072	-0.679885	4.03086	26.1597	1.10018e-11	5.73133e-10
EFHD2	1.96606	0.300583	-1.66548	3.66884	26.0856	1.17869e-11	6.12604e-10
RPS3A	-0.468715	-1.39176	-0.923048	2.44927	26.0345	1.23615e-11	6.40975e-10
HEATR1	-0.30109	-1.23676	-0.935673	3.61948	26.022	1.2506e-11	6.46965e-10
MB21D2	-0.177111	-1.40757	-1.23046	2.70937	25.9999	1.27667e-11	6.59686e-10
TSNAXIP1	-0.704119	0.513316	1.21744	3.99193	25.9654	1.31833e-11	6.79642e-10
LOC105371103	0.628773	1.16919	0.540412	4.1298	25.959	1.32623e-11	6.82135e-10
CPO	0.929016	1.21888	0.289867	3.33966	25.9496	1.33783e-11	6.87311e-10
ZGRF1	-0.38983	-1.47623	-1.0864	2.9589	25.9445	1.34425e-11	6.89746e-10
ANKRD19P	0.467101	1.05516	0.588062	3.96177	25.9433	1.34566e-11	6.89746e-10
MIR7978	-1.00439	-1.15456	-0.150174	4.36363	25.9334	1.35817e-11	6.95361e-10
PGK1	-0.615832	-1.09445	-0.478622	3.97059	25.9161	1.3803e-11	7.0588e-10
COL28A1	1.21136	1.26332	0.0519533	3.8073	25.8766	1.43194e-11	7.30615e-10
NR1D2	-0.491285	-1.11859	-0.627307	3.6698	25.8639	1.44907e-11	7.38514e-10
ADCY10	0.883407	1.3782	0.494789	3.36225	25.8227	1.50577e-11	7.63538e-10
SCAND1	-0.199761	-1.45663	-1.25687	3.0031	25.7933	1.54747e-11	7.83298e-10
LOC102724135	0.957103	1.09948	0.142378	3.76883	25.7186	1.65901e-11	8.3691e-10
BREA2	-0.896188	0.894645	1.79083	2.44433	25.7105	1.67169e-11	8.42355e-10
LOC105377989	-0.392559	-1.43992	-1.04736	3.35473	25.6829	1.71521e-11	8.62335e-10
FRMPD2	0.694003	1.29666	0.602656	1.30568	25.6373	1.7896e-11	8.98725e-10
TEX29	1.49789	1.46881	-0.0290816	1.41569	25.6018	1.84985e-11	9.2794e-10
LOC101928041	-1.2135	-0.180471	1.03303	3.84096	25.5939	1.86347e-11	9.33724e-10
PRYP2	0.660945	1.41854	0.757595	1.45842	25.5233	1.99037e-11	9.95075e-10
RN7SL2	0.89143	1.0964	0.204967	3.00402	25.5212	1.99417e-11	9.9586e-10
CITED2	1.2795	1.37104	0.0915446	2.63044	25.5047	2.02522e-11	1.01023e-09
ANKRD20A6P	-1.74011	-0.0891518	1.65096	0.822185	25.4789	2.07446e-11	1.03364e-09
LOC105376533	1.94677	-0.250759	-2.19753	3.53594	25.4684	2.09485e-11	1.04148e-09
GAL3ST4	-0.273266	0.758889	1.03216	2.56634	25.4171	2.19751e-11	1.08767e-09
TSPAN13	0.0828807	-0.99179	-1.07467	4.30844	25.4128	2.20631e-11	1.09081e-09
CAMK2A	0.179314	-1.24164	-1.42096	3.12513	25.4	2.23292e-11	1.10275e-09
TRIM6-TRIM34	-1.2437	-0.103909	1.13979	0.367709	25.3895	2.25481e-11	1.11135e-09
SNRPA1	-0.256977	-1.16812	-0.911147	3.83801	25.3893	2.25531e-11	1.11135e-09
MGAT4C	-0.371424	0.670134	1.04156	2.46816	25.3707	2.29468e-11	1.12951e-09
LOC105370512	1.38657	1.58725	0.200675	1.75362	25.3685	2.29943e-11	1.13059e-09
GNG3	-0.666061	-1.3506	-0.684536	3.39938	25.3212	2.4031e-11	1.17897e-09
CCDC37	0.75619	1.27886	0.522672	0.931925	25.259	2.54681e-11	1.24674e-09
TCEAL8	-0.479352	-1.46086	-0.981512	2.5671	25.2422	2.58705e-11	1.26366e-09
LOC100507460	0.0415916	-1.37094	-1.41253	2.88707	25.2375	2.59826e-11	1.26775e-09
ARHGAP39	1.58456	0.91727	-0.667287	3.25116	25.2226	2.63476e-11	1.28276e-09
C1D	-0.792493	-1.52015	-0.727656	2.81523	25.1925	2.70985e-11	1.31788e-09
LOC105375488	0.630216	1.1241	0.493888	1.04571	25.1776	2.74783e-11	1.33345e-09
IMPG2	0.959093	1.24524	0.286143	3.65219	25.161	2.7906e-11	1.35126e-09
LOC105371553	-1.43506	-1.73979	-0.30473	3.32585	25.1423	2.83965e-11	1.37203e-09
LOC102723560	0.245385	1.61795	1.37257	2.63075	25.1134	2.91746e-11	1.40356e-09
LOC100505727	-0.892599	0.775069	1.66767	3.09119	25.0867	2.99099e-11	1.43738e-09
ZNF354C	0.871491	-1.09687	-1.96836	2.44383	25.0006	3.24144e-11	1.5494e-09
BUD13	0.262969	-1.38125	-1.64422	2.40187	24.9876	3.28095e-11	1.56661e-09
LOC105376119	-1.69276	-1.52761	0.165145	3.75406	24.9678	3.34217e-11	1.59414e-09
SDHAF4	-0.0481353	-1.34579	-1.29765	1.84838	24.9539	3.38591e-11	1.61328e-09
TMEM167A	-0.365759	-1.06556	-0.699799	3.89485	24.927	3.47209e-11	1.65257e-09
PPP1R14C	0.872172	1.35482	0.48265	1.54296	24.8665	3.67368e-11	1.7448e-09
EEF1E1	-0.284278	-1.36327	-1.07899	3.12281	24.8588	3.70034e-11	1.7556e-09
FAM3C	-0.206077	-1.10306	-0.896979	4.04588	24.8325	3.79216e-11	1.79534e-09
DNAAF1	0.687081	1.04602	0.35894	3.84757	24.8042	3.89399e-11	1.8416e-09
TXN	-0.447677	-1.18026	-0.732581	3.64211	24.7792	3.98583e-11	1.88009e-09
KIRREL3	-1.49182	-0.29121	1.20061	1.6638	24.7779	3.99066e-11	1.88009e-09
UBB	-0.283695	-1.11702	-0.833329	3.20005	24.7775	3.99223e-11	1.88009e-09
NCOR2	-0.557896	-1.08026	-0.522366	3.10053	24.7513	4.09105e-11	1.92461e-09
POP1	-0.0558696	-1.2647	-1.20883	3.49681	24.723	4.20071e-11	1.9679e-09
LGALS3	2.07089	1.30296	-0.767928	2.95428	24.6721	4.40528e-11	2.05941e-09
KIAA1279	0.249935	-1.11493	-1.36486	3.6318	24.6588	4.46046e-11	2.08302e-09
SNORD116-8	-1.38376	0.170519	1.55428	0.59231	24.6496	4.49921e-11	2.09455e-09
AGAP5	-1.48984	-0.841115	0.64872	3.81701	24.6419	4.53154e-11	2.1074e-09
MGAT5B	0.307208	-0.923302	-1.23051	4.20834	24.5651	4.8686e-11	2.25535e-09
XRN2	-0.746594	-1.02772	-0.281129	3.90415	24.5649	4.86988e-11	2.25535e-09
OR2A1-AS1	1.2386	1.13574	-0.102866	4.20014	24.5554	4.91294e-11	2.27058e-09
LOC339978	-0.574919	-1.59361	-1.01869	3.05286	24.55	4.93788e-11	2.27739e-09
KNDC1	1.06121	-0.0556166	-1.11683	4.41787	24.5464	4.95467e-11	2.28278e-09
TBCEL	-0.633118	-1.37456	-0.741439	3.27755	24.5114	5.11966e-11	2.35636e-09
PANX1	0.530968	-1.19719	-1.72815	2.12105	24.4911	5.21757e-11	2.39895e-09
LOC101060097	-0.455871	-1.57885	-1.12298	3.16306	24.4605	5.36896e-11	2.46602e-09
SNORD47	-0.708239	-1.58354	-0.875302	2.62071	24.4331	5.5082e-11	2.52737e-09
DIRAS1	0.699693	-0.741519	-1.44121	4.17854	24.3845	5.76462e-11	2.6369e-09
LINC01296	-1.19387	-0.938604	0.255267	1.69755	24.3777	5.80117e-11	2.6509e-09
MTMR10	-0.681886	-1.07282	-0.390933	3.20675	24.3744	5.81884e-11	2.65626e-09
MELK	-1.41456	0.407875	1.82244	2.1101	24.3721	5.83167e-11	2.6594e-09
BRK1	-0.471001	-1.33083	-0.859833	2.89111	24.3543	5.9294e-11	2.7012e-09
RNF24	0.678509	1.06287	0.384359	3.58453	24.3316	6.05665e-11	2.75355e-09
LINC01098	-0.00312644	-1.28754	-1.28441	1.82232	24.3253	6.09265e-11	2.76711e-09
RPL13	-0.303639	-1.03954	-0.735899	3.66971	24.2856	6.32301e-11	2.86589e-09
EYA1	-1.79267	-0.954003	0.838666	2.11522	24.2657	6.44208e-11	2.9169e-09
GABARAP	-0.833362	-1.18818	-0.354814	3.04439	24.2349	6.63015e-11	2.99295e-09
PIN1	-0.298499	-1.17282	-0.87432	3.76256	24.1761	7.00513e-11	3.15584e-09
C10ORF111	0.269133	1.35549	1.08636	2.35167	24.1686	7.05476e-11	3.175e-09
POLR2B	-0.94153	-1.0903	-0.148767	3.60294	24.1471	7.19796e-11	3.23618e-09
PKD2L2	1.41818	1.34938	-0.0687923	2.77129	24.1284	7.32476e-11	3.28988e-09
PPIL3	-0.647542	-1.14337	-0.495829	3.8633	24.1254	7.34555e-11	3.2959e-09
USP29	-1.27632	0.737596	2.01392	2.00748	24.0976	7.53895e-11	3.37928e-09
DNM1P34	-0.708106	0.741379	1.44949	3.41294	24.057	7.83085e-11	3.49608e-09
CRYBG3	1.33748	0.959833	-0.377644	1.55498	24.0531	7.86009e-11	3.50563e-09
BEX4	-0.538346	-1.03221	-0.493864	3.78853	24.0199	8.10791e-11	3.61255e-09
ACRC	1.64737	1.13442	-0.512956	3.17883	24.0038	8.23077e-11	3.66364e-09
GCLC	-0.470839	-1.01235	-0.541516	3.98838	23.9922	8.32118e-11	3.70019e-09
LOC102467224	0.838961	-0.966788	-1.80575	2.02534	23.9656	8.53069e-11	3.78958e-09
ECT2L	0.736203	1.00683	0.270623	4.10944	23.9594	8.5801e-11	3.80774e-09
LOC101927345	-1.53253	-0.814938	0.717594	3.147	23.9573	8.59746e-11	3.81165e-09
OR52N4	-0.971963	0.179739	1.1517	0.242859	23.9209	8.89498e-11	3.93185e-09
ZNF559	0.22328	-1.09215	-1.31543	3.2276	23.8506	9.50058e-11	4.17885e-09
COL24A1	1.26373	1.42619	0.16246	3.03657	23.8325	9.66309e-11	4.2378e-09
CRYBB2	1.45098	1.29545	-0.155533	1.10761	23.8106	9.8629e-11	4.30851e-09
ANAPC13	-0.196969	-1.39692	-1.19995	2.59825	23.8032	9.93193e-11	4.33442e-09
FNBP1L	0.339889	-1.04151	-1.3814	2.23228	23.7874	1.00803e-10	4.3863e-09
LOC105371096	-0.10381	-1.53706	-1.43325	1.45356	23.7453	1.04851e-10	4.54913e-09
RPRD1B	0.93003	-0.815379	-1.74541	3.07043	23.7217	1.07202e-10	4.64212e-09
PFKM	0.567924	-0.768433	-1.33636	4.0071	23.7142	1.07957e-10	4.66579e-09
DACH1	1.58652	-0.444295	-2.03082	1.82781	23.7022	1.09175e-10	4.71385e-09
ULK3	0.665466	-0.395965	-1.06143	4.70233	23.6526	1.1437e-10	4.92387e-09
NACA	-0.647594	-1.1627	-0.515102	3.39442	23.6486	1.14802e-10	4.9377e-09
PNMA3	1.78428	0.283326	-1.50096	3.87837	23.6417	1.15547e-10	4.96497e-09
ZFAND2B	-0.222918	-1.41276	-1.18984	2.78367	23.5963	1.2056e-10	5.16544e-09
KLKB1	0.261625	1.35612	1.09449	1.73964	23.5898	1.21296e-10	5.192e-09
RPS2P5	-0.13914	-1.35743	-1.21829	1.33115	23.5832	1.22054e-10	5.21944e-09
LOC101928964	0.162705	-1.03216	-1.19486	1.62335	23.5638	1.24287e-10	5.29972e-09
SIRT2	0.968677	-0.439738	-1.40841	3.33078	23.5628	1.24408e-10	5.29981e-09
LOC105371220	0.239818	1.1518	0.911986	3.92456	23.5525	1.25619e-10	5.33614e-09
APEX1	-0.836592	-1.39181	-0.555217	3.18443	23.5412	1.26957e-10	5.38782e-09
LOC105374045	-0.446267	0.83674	1.28301	0.806584	23.4892	1.33299e-10	5.65158e-09
LILRA5	-0.873015	0.848973	1.72199	1.22359	23.4204	1.42175e-10	6.00509e-09
PACSIN1	0.412647	-0.603574	-1.01622	4.57209	23.4083	1.43802e-10	6.0681e-09
MIEN1	-0.60577	-1.3587	-0.752933	3.17913	23.4041	1.44369e-10	6.08626e-09
LINC00266-1	1.66348	0.87305	-0.790433	3.62367	23.398	1.45195e-10	6.1146e-09
ZNF10	0.26694	-1.09509	-1.36203	3.21547	23.3971	1.45315e-10	6.1146e-09
MUC4	0.0171218	1.33716	1.32004	2.088	23.3538	1.51344e-10	6.35035e-09
NRBF2P5	1.28322	1.03796	-0.245256	0.58983	23.3336	1.54225e-10	6.46513e-09
LOC101928277	1.36261	1.11867	-0.243941	1.47437	23.3312	1.54576e-10	6.47379e-09
PSMF1	-0.194614	-1.05065	-0.856039	3.78901	23.3082	1.57943e-10	6.60859e-09
LOC402279	-0.0948318	1.4093	1.50414	2.32853	23.2817	1.61922e-10	6.7624e-09
C2ORF74	0.57346	-1.14388	-1.71734	3.04972	23.2656	1.64381e-10	6.8587e-09
DNASE1L2	1.12978	1.52963	0.399848	1.71254	23.1422	1.84559e-10	7.65054e-09
ACTR1A	-0.346413	-1.4686	-1.12219	2.93425	23.1364	1.8557e-10	7.6853e-09
PTPRK	-1.29711	-0.243034	1.05408	3.07948	23.1181	1.88794e-10	7.8116e-09
LOC101927385	0.944007	1.20202	0.258017	3.34708	23.093	1.93279e-10	7.98975e-09
LOC105379154	-0.758304	-1.21708	-0.45878	3.17892	22.9978	2.11342e-10	8.6882e-09
LOC105373722	-0.808954	-1.46552	-0.65657	2.89169	22.9916	2.12585e-10	8.73126e-09
LAMA5	0.365039	-0.735972	-1.10101	4.50656	22.9488	2.21292e-10	9.07217e-09
KIF25	2.28442	0.957551	-1.32687	2.29183	22.889	2.34073e-10	9.57558e-09
WDR12	-0.319546	-1.29292	-0.973377	3.39384	22.8884	2.34215e-10	9.57558e-09
NSMF	1.28091	-0.344385	-1.62529	3.58357	22.8869	2.34551e-10	9.58053e-09
POLR2I	-0.37578	-1.31068	-0.9349	3.0097	22.8853	2.3489e-10	9.58563e-09
SNRPE	-0.618409	-1.40378	-0.785375	2.18346	22.8815	2.3573e-10	9.61112e-09
UBL5	-0.938432	-1.18164	-0.243208	3.3109	22.8263	2.48283e-10	1.00769e-08
PMS2P7	-0.325403	-1.3152	-0.989795	3.23355	22.8045	2.5341e-10	1.02757e-08
FUT9	-1.10008	0.0750647	1.17515	1.58575	22.8019	2.54034e-10	1.02916e-08
EMC4	-0.804489	-1.32362	-0.519134	2.80123	22.7984	2.54872e-10	1.03162e-08
DND1P1	-0.760272	-1.58406	-0.823787	2.08673	22.7373	2.69918e-10	1.08857e-08
LOC101927314	-1.40084	-1.07483	0.326017	2.98619	22.7329	2.71027e-10	1.09206e-08
WDR83OS	-0.153023	-1.29568	-1.14266	2.82868	22.6951	2.80831e-10	1.12749e-08
WHSC1	0.838466	-0.252514	-1.09098	4.22448	22.6939	2.81144e-10	1.12773e-08
PFN1	0.0612265	-1.17426	-1.23548	2.56923	22.689	2.82439e-10	1.13055e-08
LOC105379515	-1.75187	-1.17497	0.576895	1.46833	22.6615	2.89834e-10	1.15242e-08
TUBGCP5	-0.880091	-1.04197	-0.161879	3.98019	22.6614	2.89879e-10	1.15242e-08
THUMPD2	-0.961078	-1.16234	-0.201265	3.07156	22.6396	2.95868e-10	1.17518e-08
ZNF603P	0.285767	1.27247	0.986708	1.08629	22.6198	3.01433e-10	1.19516e-08
LOC105373704	-0.306957	-1.28002	-0.97306	1.11848	22.6187	3.01741e-10	1.19532e-08
LOC729468	-0.107489	0.980604	1.08809	3.519	22.6139	3.03099e-10	1.19963e-08
LOC389906	0.105723	-1.28958	-1.39531	2.10278	22.604	3.0593e-10	1.20976e-08
WDR49	1.62144	1.15602	-0.465419	2.49394	22.5468	3.22816e-10	1.27316e-08
LINC01002	-1.12296	-1.53485	-0.411895	1.48156	22.4815	3.43252e-10	1.35018e-08
PIN4P1	-0.512258	0.803508	1.31577	2.75723	22.4782	3.44327e-10	1.35321e-08
C3ORF20	1.27153	1.31556	0.0440302	1.53464	22.466	3.48296e-10	1.36761e-08
CHRNE	0.288882	1.27526	0.986382	1.47473	22.4222	3.62931e-10	1.4192e-08
SCPEP1	1.0467	-0.718161	-1.76486	3.56315	22.4177	3.64474e-10	1.42237e-08
NAE1	-0.513705	-1.12462	-0.610913	3.41584	22.3975	3.71467e-10	1.44819e-08
DKK2	0.920448	-1.05614	-1.97659	2.35006	22.3709	3.80884e-10	1.48123e-08
LOC101928096	0.678965	1.09744	0.418471	3.75116	22.3664	3.82489e-10	1.48618e-08
KCNN3	-1.15478	-0.742142	0.412641	3.9791	22.3514	3.87913e-10	1.50594e-08
LOC105376214	0.320069	-1.22368	-1.54375	1.72038	22.3197	3.99653e-10	1.55017e-08
NREP	-0.514931	-1.10541	-0.590476	3.29986	22.315	4.01424e-10	1.55569e-08
COTL1	0.625849	-1.07521	-1.70106	2.85956	22.305	4.05212e-10	1.56901e-08
STMN4	-0.808311	-1.02102	-0.212711	2.1454	22.3002	4.07035e-10	1.5747e-08
TREM1	-0.778591	0.853608	1.6322	1.20405	22.2668	4.20045e-10	1.62222e-08
TEKT4P1	-1.56325	-0.0185234	1.54473	0.837599	22.2451	4.28687e-10	1.65417e-08
RMDN2	-0.413068	-1.23892	-0.825848	3.13679	22.0998	4.91497e-10	1.88351e-08
LOC105369510	-1.3831	-0.869813	0.513288	0.736944	22.0965	4.93039e-10	1.8878e-08
CFAP53	0.670966	1.24996	0.578996	1.13401	22.0844	4.98681e-10	1.90776e-08
C1GALT1	0.293973	-0.772311	-1.06628	3.77086	22.0686	5.06148e-10	1.93467e-08
SAP18	-0.474327	-1.17009	-0.695763	3.47316	22.0653	5.07713e-10	1.939e-08
APIP	0.69643	-0.60699	-1.30342	3.79267	22.0523	5.13951e-10	1.96114e-08
ITM2A	-0.261122	-1.24763	-0.986506	1.7966	22.0427	5.18616e-10	1.97725e-08
LIMA1	-0.382826	-1.16778	-0.784949	3.70143	21.9992	5.40308e-10	2.05819e-08
LOC105369559	-1.2714	-0.0328166	1.23859	0.75481	21.9949	5.42461e-10	2.06463e-08
DENND4B	0.177545	-1.21214	-1.38968	3.51613	21.9577	5.61821e-10	2.13468e-08
GUCY1A3	-0.904499	-1.0696	-0.165099	2.86405	21.9549	5.63269e-10	2.13836e-08
PAIP2	-0.681031	-1.01402	-0.332991	3.51965	21.9439	5.69154e-10	2.15887e-08
TEC	0.391539	-1.31238	-1.70392	3.2646	21.9394	5.71559e-10	2.16615e-08
LOC101927998	-1.82594	-1.00885	0.817095	3.48671	21.9321	5.75529e-10	2.17935e-08
LOC105374529	1.01635	0.229088	-0.787263	4.6426	21.9205	5.81818e-10	2.19806e-08
SLC22A18AS	1.20185	1.30374	0.101891	0.991137	21.8883	5.99735e-10	2.25951e-08
ELOVL5	1.23829	0.884295	-0.353999	3.39337	21.8675	6.11587e-10	2.30028e-08
POR	1.41868	1.00949	-0.409196	3.36812	21.7973	6.5341e-10	2.45345e-08
LOC105377529	1.27936	1.19404	-0.0853264	1.41693	21.7904	6.57671e-10	2.4653e-08
LOC642846	-1.6816	0.0925215	1.77413	1.77333	21.7772	6.65902e-10	2.49238e-08
CLTCL1	0.313551	-0.832575	-1.14613	3.95764	21.7719	6.69218e-10	2.50228e-08
KGFLP2	1.13918	0.691535	-0.447644	4.18165	21.7227	7.00963e-10	2.60787e-08
CORO1C	-0.763214	-1.04015	-0.276931	3.83204	21.6845	7.26655e-10	2.70072e-08
SPESP1	-1.12117	0.360679	1.48185	0.672323	21.6838	7.27129e-10	2.70072e-08
LINC01184	-0.95948	-1.08266	-0.12318	3.49401	21.6752	7.33031e-10	2.72038e-08
CCDC169-SOHLH2	-1.31664	-0.0295819	1.28706	0.567271	21.668	7.38e-10	2.73428e-08
WNT3	-0.182015	-1.15341	-0.971392	3.69668	21.6657	7.39575e-10	2.73784e-08
MFSD8	-0.51879	-1.21903	-0.700236	3.2258	21.6641	7.40736e-10	2.73987e-08
SLAMF6	-0.30435	1.0863	1.39065	3.0699	21.6424	7.5603e-10	2.79181e-08
ISG20	1.93974	1.05673	-0.883006	2.17936	21.6367	7.60099e-10	2.80452e-08
LOC101060104	-0.102933	-1.45216	-1.34923	3.13117	21.6027	7.84817e-10	2.89094e-08
SLC22A3	-1.80089	0.0908042	1.8917	2.33074	21.5892	7.94864e-10	2.92312e-08
ATP6V1D	-0.227365	-1.14127	-0.913901	3.35419	21.5427	8.30473e-10	3.04655e-08
RPL7A	-0.781048	-1.17531	-0.394259	2.88226	21.5296	8.40791e-10	3.08186e-08
CSRNP1	1.63308	1.25796	-0.375122	1.62737	21.5072	8.58708e-10	3.14495e-08
FAM204A	-0.385908	-1.01911	-0.633203	3.74174	21.4763	8.84126e-10	3.23274e-08
DDHD2	-0.276315	-1.08448	-0.808164	3.92221	21.4643	8.94156e-10	3.26674e-08
LOC105377755	0.229442	-1.30423	-1.53367	2.48184	21.4273	9.25892e-10	3.37165e-08
KDM6A	0.177294	-0.866016	-1.04331	3.25456	21.4097	9.41352e-10	3.42237e-08
POLR3A	0.17113	-0.864613	-1.03574	3.92431	21.4013	9.48831e-10	3.44675e-08
LINC01061	-1.08143	-1.15495	-0.0735187	1.44738	21.3898	9.59172e-10	3.48148e-08
GABRG3	-1.01999	-1.16752	-0.147533	2.89394	21.3703	9.77054e-10	3.53776e-08
GRAMD4P7	0.157238	1.06517	0.907932	2.80754	21.3564	9.89857e-10	3.57831e-08
LOC105371899	0.525513	1.37507	0.849561	1.38139	21.3509	9.95022e-10	3.59407e-08
CARS	0.221654	-1.06492	-1.28658	3.41135	21.3468	9.98937e-10	3.6053e-08
DRP2	0.19535	1.33955	1.1442	1.69201	21.3419	1.0035e-09	3.61885e-08
LOC101928605	1.13372	1.08542	-0.0483045	4.20442	21.3238	1.02082e-09	3.67536e-08
PSMD2	-0.224465	-1.06314	-0.838676	3.86227	21.3184	1.02602e-09	3.69109e-08
ZNF226	-0.125527	-1.17691	-1.05138	3.14909	21.317	1.02739e-09	3.69305e-08
MAB21L3	0.773477	1.199	0.42552	3.52325	21.3032	1.0408e-09	3.73527e-08
CRHR2	1.09368	0.943453	-0.15023	0.614634	21.2753	1.06856e-09	3.8291e-08
CEACAM21	1.19965	0.685866	-0.51378	2.02012	21.2752	1.06867e-09	3.8291e-08
DOK3	1.3945	1.41441	0.0199069	2.08788	21.2603	1.08374e-09	3.88e-08
ABI3BP	1.34022	1.21076	-0.129455	2.15043	21.2297	1.11547e-09	3.984e-08
LYG2	0.878539	1.13414	0.255602	3.46216	21.2255	1.11997e-09	3.99688e-08
SNRPD1	-0.346004	-1.35406	-1.00806	2.5733	21.2208	1.12491e-09	4.00811e-08
LINC00965	0.743298	-0.959042	-1.70234	2.94182	21.2166	1.12935e-09	4.02073e-08
LOC105373850	0.962868	1.25881	0.295943	3.11951	21.2019	1.14511e-09	4.07358e-08
LOC102724580	-0.720584	0.366375	1.08696	4.22827	21.1816	1.16732e-09	4.13941e-08
CRELD1	1.1111	0.781816	-0.32928	4.08022	21.1714	1.17863e-09	4.16956e-08
TESK1	1.86003	0.303289	-1.55674	3.22154	21.1462	1.20688e-09	4.26275e-08
C9ORF153	1.63041	1.22022	-0.410189	1.97397	21.1423	1.21142e-09	4.27542e-08
RMND5B	0.106175	-1.07633	-1.1825	3.23223	21.1206	1.23641e-09	4.35672e-08
DNAJC18	0.341171	-0.661796	-1.00297	3.99753	21.0724	1.29394e-09	4.54178e-08
NAV2-AS2	1.51594	1.05666	-0.459282	1.05738	21.0723	1.29402e-09	4.54178e-08
PAAF1	-0.823986	-1.19465	-0.370661	2.36533	21.0544	1.31614e-09	4.61216e-08
LOC102724571	-0.107087	-1.50668	-1.39959	2.69676	21.042	1.3316e-09	4.66268e-08
RPS26P25	-0.56169	-1.21986	-0.658171	2.94689	21.0247	1.35353e-09	4.73159e-08
RPPH1	-1.54708	0.207778	1.75486	0.925331	21.024	1.35446e-09	4.73159e-08
ZNF559-ZNF177	1.13619	-0.240783	-1.37697	3.7787	21.003	1.38147e-09	4.8184e-08
MEG9	1.37721	0.265159	-1.11205	4.69827	20.9587	1.44051e-09	5.02041e-08
LOC100288893	0.495368	1.39163	0.896259	1.70987	20.9448	1.45946e-09	5.0825e-08
SNORD80	-0.331743	-1.34098	-1.00923	1.24095	20.906	1.51403e-09	5.25613e-08
LOC105373486	-0.260532	1.16259	1.42312	2.22357	20.8886	1.53911e-09	5.32663e-08
ARHGAP6	-0.329813	-1.43364	-1.10383	2.56618	20.8732	1.56155e-09	5.39592e-08
CRISPLD1	-0.106231	-1.29503	-1.18879	1.8695	20.8637	1.57568e-09	5.44056e-08
C2ORF66	1.54593	1.4034	-0.142525	1.625	20.8466	1.60126e-09	5.52034e-08
LOC102724594	-0.520582	-1.17864	-0.658057	2.96714	20.8108	1.65636e-09	5.69269e-08
KIFC2	1.26691	-0.172679	-1.43959	4.30518	20.808	1.66071e-09	5.70328e-08
LOC100132062	0.0158876	-1.2699	-1.28579	1.46291	20.7856	1.69625e-09	5.81444e-08
CTGLF12P	-1.42925	-1.15054	0.278709	3.4191	20.7851	1.69699e-09	5.81444e-08
LINC01474	-0.696418	0.453787	1.1502	0.427001	20.7806	1.70425e-09	5.83485e-08
SMIM8	0.156223	-1.17511	-1.33133	3.2134	20.7723	1.71769e-09	5.87634e-08
LOC105375044	0.939914	1.34495	0.40504	2.4985	20.7681	1.72452e-09	5.89168e-08
CD247	1.50532	1.34403	-0.16129	2.45254	20.7628	1.73311e-09	5.91548e-08
PZP	1.57837	1.22173	-0.356635	2.76079	20.7521	1.75081e-09	5.96679e-08
RAPGEF1	0.475681	-0.708038	-1.18372	3.83845	20.75	1.75415e-09	5.96849e-08
RGL4	0.125483	-1.32796	-1.45344	1.92055	20.7493	1.75532e-09	5.96849e-08
SF3B5	-0.316053	-1.34804	-1.03199	2.8503	20.7331	1.78241e-09	6.05139e-08
PRSS48	-0.194052	-1.39936	-1.20531	2.26867	20.729	1.78931e-09	6.0702e-08
LOC105369391	0.56607	-1.10819	-1.67426	3.27229	20.7202	1.80424e-09	6.11155e-08
VBP1	-0.404531	-1.24125	-0.836719	2.73533	20.6932	1.85085e-09	6.25995e-08
EGFEM1P	-0.936768	0.526992	1.46376	3.43494	20.6905	1.85554e-09	6.27104e-08
LOC101060026	0.562838	-0.684126	-1.24696	3.83068	20.6796	1.87487e-09	6.33157e-08
PSMB6	-0.35077	-1.32182	-0.971049	2.50308	20.6508	1.92646e-09	6.49599e-08
PRKCH	0.702978	-0.31636	-1.01934	4.63357	20.6361	1.95346e-09	6.57707e-08
RAB27B	-0.77957	-1.30245	-0.522881	2.93212	20.6213	1.98086e-09	6.66396e-08
WFDC1	-0.59294	-1.50627	-0.913333	2.64051	20.6197	1.98394e-09	6.66462e-08
BCL6	0.306026	1.0196	0.713572	2.60486	20.5967	2.02761e-09	6.79599e-08
KISS1R	1.04833	1.0373	-0.0110284	0.490233	20.586	2.04805e-09	6.85422e-08
MBD4	-0.121005	-1.27086	-1.14985	2.64978	20.5719	2.07552e-09	6.94093e-08
LOC100421332	-1.19925	0.550732	1.74998	1.55964	20.5302	2.15901e-09	7.20395e-08
SLC35B3	-0.804495	-1.17205	-0.367555	2.71446	20.5233	2.17304e-09	7.24535e-08
LOC101928347	0.146501	-1.14368	-1.29018	1.13631	20.5218	2.17625e-09	7.25065e-08
SMC3	-0.0682185	-1.02286	-0.954644	3.47208	20.5058	2.20942e-09	7.35019e-08
ZNF222	-0.292346	-1.38148	-1.08914	1.51324	20.4866	2.24972e-09	7.47311e-08
LOC105371108	-0.0197079	-1.40578	-1.38607	1.42895	20.4783	2.2676e-09	7.5269e-08
RASGRP2	0.201526	1.17684	0.975318	3.70886	20.4494	2.33019e-09	7.71173e-08
CCDC13	1.26164	1.30215	0.0405073	1.89606	20.4254	2.38381e-09	7.87169e-08
MBNL3	-0.787486	0.709163	1.49665	2.43291	20.4123	2.41355e-09	7.95224e-08
RGS16	0.314649	-0.705332	-1.01998	4.22702	20.4091	2.42067e-09	7.96982e-08
CELF2-AS1	-0.0136502	-1.32038	-1.30673	2.91337	20.4048	2.43072e-09	7.99703e-08
RPL37A	-0.239005	-1.09097	-0.851964	2.90959	20.3716	2.50813e-09	8.2392e-08
TMEM208	-0.52691	-1.403	-0.876093	2.32781	20.3699	2.51209e-09	8.24043e-08
RAB11FIP1P1	0.220571	-1.24193	-1.4625	2.89534	20.3686	2.51515e-09	8.24442e-08
LOC101928314	-0.64749	-1.25333	-0.605843	2.22667	20.3662	2.52089e-09	8.25715e-08
LOC102724041	1.5431	1.24708	-0.296026	2.14158	20.3629	2.52889e-09	8.27728e-08
LINC01001	-0.877235	-1.39858	-0.521343	2.18431	20.359	2.53805e-09	8.29511e-08
LOC105370832	1.10109	1.14863	0.047545	1.76862	20.348	2.5647e-09	8.37005e-08
TRNT	1.23275	1.05387	-0.178877	1.05689	20.348	2.56473e-09	8.37005e-08
CTSA	0.122904	-0.95272	-1.07562	3.45795	20.3084	2.66259e-09	8.67042e-08
CCDC74A	-0.0457698	-1.46498	-1.41921	2.50903	20.2284	2.87178e-09	9.31763e-08
AR	1.26895	-0.574289	-1.84324	2.96107	20.1876	2.98484e-09	9.67042e-08
RPL41	-0.722526	-1.10906	-0.386533	2.79964	20.1565	3.07371e-09	9.94391e-08
CABP1	0.881533	-0.282869	-1.1644	4.37609	20.1401	3.12182e-09	1.00849e-07
TUBB	0.195442	-0.880602	-1.07604	3.86061	20.1338	3.14063e-09	1.01372e-07
STC2	0.896072	1.29716	0.401085	1.07698	20.1159	3.19423e-09	1.02891e-07
SPTLC3	0.848797	1.24916	0.400361	1.64817	20.0856	3.28688e-09	1.05799e-07
ZNF503	0.414378	-1.10783	-1.5222	2.90323	20.0765	3.31531e-09	1.0633e-07
SLC35E2B	1.20544	0.0330812	-1.17236	3.892	20.0461	3.41216e-09	1.09358e-07
KLHDC3	0.454227	-0.921286	-1.37551	3.32498	20.0436	3.42017e-09	1.09536e-07
TPPP	0.628271	-0.551437	-1.17971	3.89883	20.0422	3.42464e-09	1.09601e-07
PMM1	0.0125175	-1.27082	-1.28334	2.42686	20.0335	3.4532e-09	1.10357e-07
LOC105372160	-0.719873	-1.13871	-0.418834	2.02793	20.0284	3.46966e-09	1.10803e-07
SSB	-0.55446	-1.02048	-0.466022	3.56726	20.0224	3.48956e-09	1.11279e-07
ZNF334	0.187134	-1.12567	-1.3128	3.03343	20.0181	3.50384e-09	1.11655e-07
MTCO2P2	1.0544	1.04284	-0.0115638	0.8827	19.9936	3.58602e-09	1.14111e-07
KRT81	0.403326	-1.04795	-1.45127	1.58908	19.98	3.63238e-09	1.15504e-07
LINC01447	0.105411	-1.07636	-1.18177	3.69972	19.9728	3.65732e-09	1.16132e-07
ARPC5L	-0.0147312	-1.19865	-1.18392	3.34523	19.9674	3.67587e-09	1.16638e-07
RSL24D1	-0.430548	-1.26692	-0.836375	3.05829	19.9455	3.75291e-09	1.18913e-07
C19ORF43	-0.0187653	-1.12083	-1.10206	3.25418	19.9317	3.80212e-09	1.20387e-07
RSPO3	-0.591252	-1.26562	-0.674364	3.58561	19.9277	3.81675e-09	1.20765e-07
OMG	0.0555569	-1.10457	-1.16013	3.20829	19.908	3.88849e-09	1.22947e-07
COL18A1	0.879687	1.02193	0.142244	2.79869	19.8992	3.92123e-09	1.23895e-07
ZNF266	0.805449	-0.848286	-1.65373	2.83801	19.8941	3.9401e-09	1.24315e-07
LOC105375448	0.716425	1.15429	0.437866	0.793671	19.8885	3.96111e-09	1.2489e-07
COPB2	0.0615133	-1.02121	-1.08272	3.16338	19.8808	3.98981e-09	1.25617e-07
LOC101929479	1.14217	1.09018	-0.0519878	3.49988	19.8538	4.09308e-09	1.28506e-07
RPL7	-0.818044	-1.30981	-0.491764	2.1678	19.8507	4.10536e-09	1.28801e-07
LOC105373893	-0.636246	0.850804	1.48705	3.6712	19.848	4.1159e-09	1.29041e-07
MAP2K6	1.4698	0.761345	-0.708457	3.52016	19.8382	4.15428e-09	1.2997e-07
CBR3-AS1	-0.371548	-1.37465	-1.00311	2.23599	19.8368	4.15965e-09	1.30047e-07
LINC01410	-0.799733	0.230047	1.02978	3.96926	19.8187	4.23159e-09	1.32204e-07
NTAN1	-0.0795581	-1.27088	-1.19132	3.26381	19.812	4.25836e-09	1.32947e-07
FAHD2CP	0.342528	-0.889661	-1.23219	2.6971	19.808	4.27441e-09	1.33355e-07
FAM229A	0.679336	1.11161	0.432277	1.03948	19.8034	4.29305e-09	1.33843e-07
LL22NC01-81G9.3	-0.776998	0.609848	1.38685	3.08992	19.7913	4.3428e-09	1.35085e-07
LOC102724514	-0.823602	-1.42248	-0.598879	3.25184	19.732	4.59362e-09	1.42122e-07
RNY3	-1.05301	0.647305	1.70031	1.17692	19.7307	4.59919e-09	1.42196e-07
CHIAP2	-1.24873	0.438426	1.68716	1.13519	19.7108	4.68677e-09	1.44695e-07
FSD1	1.38372	0.162574	-1.22115	4.10226	19.695	4.7573e-09	1.46678e-07
LOC105369732	0.528732	1.08141	0.552683	4.01284	19.6598	4.91865e-09	1.51444e-07
ZNF449	-0.560448	-1.17747	-0.617018	3.95196	19.6539	4.94591e-09	1.51864e-07
HSD17B11	-0.526717	-1.26627	-0.739548	3.50875	19.6498	4.96545e-09	1.52359e-07
ATF6B	-0.272617	-1.19045	-0.91783	3.6834	19.6423	5.00084e-09	1.5334e-07
PNKP	0.662383	-0.853544	-1.51593	3.8128	19.6253	5.08187e-09	1.55397e-07
SLC6A7	-1.52496	-1.18092	0.344035	3.31002	19.622	5.09792e-09	1.55781e-07
SERPINB10	-0.684354	0.855351	1.5397	2.17102	19.6163	5.12525e-09	1.56509e-07
FBXO38	-0.286184	-1.00072	-0.71454	3.84731	19.5898	5.25571e-09	1.60165e-07
GRAMD4P1	0.338022	1.06416	0.726136	3.02279	19.5718	5.34613e-09	1.62698e-07
NT5C3B	0.403649	-1.1055	-1.50915	2.8675	19.5449	5.48388e-09	1.66549e-07
ZNF839P1	-0.59849	0.540177	1.13867	0.406764	19.5315	5.55434e-09	1.6846e-07
CAGE1	0.840452	1.24258	0.402125	2.10518	19.5301	5.56151e-09	1.68563e-07
GNA11	1.36736	-0.435108	-1.80247	2.71377	19.5267	5.57954e-09	1.68995e-07
ALS2CR12	1.11843	0.930616	-0.18781	4.09652	19.5209	5.61017e-09	1.69808e-07
NMRK1	1.73401	0.396915	-1.33709	3.60111	19.5122	5.65669e-09	1.711e-07
C3ORF17	0.255758	-1.01445	-1.2702	3.04755	19.5027	5.70792e-09	1.72416e-07
DNM1P28	0.339532	-1.05399	-1.39352	3.10195	19.4988	5.72896e-09	1.72934e-07
KCNJ12	1.07121	-0.711352	-1.78257	3.55867	19.4971	5.73842e-09	1.73103e-07
SLC6A13	1.64522	1.15907	-0.486147	1.6016	19.4778	5.84384e-09	1.7596e-07
HGSNAT	0.442123	-0.608802	-1.05092	4.10686	19.4776	5.84498e-09	1.7596e-07
RPL23AP2	1.22399	1.45212	0.228129	1.5573	19.4746	5.86185e-09	1.7623e-07
TTC21B-AS1	-0.285205	-1.34051	-1.05531	1.91935	19.4442	6.03297e-09	1.81009e-07
CELA2A	1.29213	1.31997	0.0278411	1.70776	19.4311	6.10878e-09	1.82827e-07
PUS7	0.361672	-1.04382	-1.40549	2.73107	19.4167	6.19265e-09	1.85054e-07
RPLP1P13	-1.01986	0.504751	1.52461	2.904	19.3951	6.32076e-09	1.88756e-07
POLR2E	0.682113	-0.709703	-1.39182	3.75843	19.3917	6.34091e-09	1.89105e-07
LOC105377195	0.136289	-1.12456	-1.26085	2.82325	19.3774	6.42749e-09	1.91431e-07
LOC643367	-0.620176	-1.08877	-0.468599	3.45244	19.3531	6.57737e-09	1.95504e-07
LOC105371745	1.00244	0.94483	-0.0576113	0.547952	19.3433	6.63881e-09	1.96937e-07
CUBN	1.66395	0.897766	-0.766183	3.36387	19.3412	6.65204e-09	1.97198e-07
PCGF1	0.271439	-1.22482	-1.49626	2.32971	19.3371	6.67798e-09	1.97836e-07
LINC01055	-0.055716	1.09461	1.15033	2.56724	19.3332	6.70234e-09	1.98426e-07
RNU6-1	-0.143837	1.1687	1.31253	2.73144	19.3322	6.70882e-09	1.98486e-07
RASA3	1.21741	-0.261685	-1.47909	3.72814	19.322	6.77419e-09	2.00155e-07
LAMTOR3	0.432313	-1.03261	-1.46493	3.21074	19.3131	6.83146e-09	2.01713e-07
STK32C	1.49339	-0.00995475	-1.50334	3.84555	19.3076	6.86733e-09	2.02638e-07
ATP6V1G2	0.118698	-1.01455	-1.13325	3.39025	19.3025	6.90012e-09	2.03472e-07
WASH5P	0.330362	-0.804344	-1.13471	3.88009	19.2983	6.92809e-09	2.04117e-07
IQCF3	-0.708159	0.943591	1.65175	1.58795	19.2831	7.02826e-09	2.06704e-07
LOC105370905	-0.00138618	1.01189	1.01328	1.29658	19.2805	7.046e-09	2.07002e-07
CCAR2	-0.533283	-1.26922	-0.735935	2.5209	19.2736	7.09191e-09	2.08164e-07
NBPF25P	-0.199151	0.826543	1.02569	3.66241	19.2723	7.10074e-09	2.08287e-07
SHBG	-0.336044	-1.24107	-0.905024	3.42363	19.2557	7.21374e-09	2.11463e-07
LOC105377322	1.27102	1.39464	0.123623	1.55609	19.2477	7.26822e-09	2.12895e-07
PRKCZ	0.110686	-1.05881	-1.16949	3.42642	19.2459	7.28064e-09	2.13004e-07
CLK4	-0.607906	-1.02155	-0.413644	3.74002	19.203	7.58285e-09	2.2141e-07
HMOX2	0.163369	-0.841384	-1.00475	3.71954	19.1975	7.6226e-09	2.22426e-07
RBMY2AP	-0.561193	0.514455	1.07565	0.34036	19.1837	7.72304e-09	2.25209e-07
FABP6	-0.982538	-1.39346	-0.410921	3.04498	19.1573	7.9187e-09	2.30613e-07
JAZF1-AS1	1.03657	1.40086	0.364287	3.16957	19.1455	8.00813e-09	2.33066e-07
OVCH2	1.05716	-0.755199	-1.81236	4.01833	19.1273	8.14751e-09	2.36814e-07
SPCS2P4	-0.819142	-1.29866	-0.47952	2.51111	19.1003	8.35886e-09	2.4264e-07
LOC105375886	1.20292	1.02788	-0.175039	0.959324	19.0963	8.39073e-09	2.43408e-07
CDC14BL	-0.588395	0.624953	1.21335	0.869576	19.0728	8.57953e-09	2.48561e-07
PPIB	-0.454965	-1.17917	-0.724202	2.70188	19.0552	8.7241e-09	2.52422e-07
NME1	-0.267279	-1.28278	-1.01551	2.97854	19.048	8.78371e-09	2.53982e-07
LOC105372852	0.405897	1.11402	0.708126	1.17111	19.0352	8.89141e-09	2.5693e-07
GOLGA2P7	0.895061	1.03244	0.137382	3.51832	19.0323	8.91559e-09	2.57462e-07
RPS28	-0.246795	0.954091	1.20089	2.38337	19.0232	8.99294e-09	2.59045e-07
CEPT1	-0.62396	-1.01326	-0.389297	3.86439	19.0044	9.15496e-09	2.63522e-07
FTH1P1	-1.01012	-1.25066	-0.24054	1.21686	19.0006	9.18767e-09	2.64123e-07
LOC105374993	0.301889	-1.2031	-1.50498	1.73039	18.9971	9.21888e-09	2.6485e-07
LOC105377969	1.88464	1.14052	-0.744121	2.04267	18.9943	9.24317e-09	2.65377e-07
TPRG1L	0.542253	-0.911182	-1.45343	3.54366	18.9827	9.34536e-09	2.68138e-07
HBA2	0.743831	-0.935252	-1.67908	1.83058	18.9801	9.36858e-09	2.68632e-07
IER3IP1	0.159422	-1.12614	-1.28556	2.98599	18.9788	9.38018e-09	2.68792e-07
HEXA-AS1	-0.588371	0.80479	1.39316	2.96422	18.9776	9.39105e-09	2.68931e-07
GCA	-0.523789	-1.08728	-0.563486	1.66962	18.9711	9.44842e-09	2.704e-07
FRZB	-0.14743	1.06771	1.21514	2.25994	18.9661	9.49354e-09	2.71518e-07
OTUB1	0.101538	-0.979232	-1.08077	3.31373	18.9654	9.50042e-09	2.7154e-07
PSMC2	-0.341894	-1.07578	-0.733889	3.45542	18.9595	9.55333e-09	2.72878e-07
RPL23AP21	1.03076	1.07165	0.0408911	0.830782	18.9526	9.61627e-09	2.745e-07
RPS10	-0.272403	-1.1978	-0.925392	3.24206	18.945	9.68604e-09	2.75962e-07
LOC105376043	1.96826	0.39718	-1.57108	2.12368	18.9389	9.74205e-09	2.77381e-07
GRAMD2	0.90258	1.08304	0.180465	3.26868	18.9331	9.79526e-09	2.78625e-07
TAF1C	0.752735	-0.695778	-1.44851	3.59015	18.9328	9.79821e-09	2.78625e-07
LOC101927615	-1.76061	-0.23102	1.52959	1.9528	18.932	9.8057e-09	2.7866e-07
LOC105375411	1.54403	1.06878	-0.475251	1.5554	18.9161	9.95503e-09	2.82724e-07
RPS6	-0.692504	-1.1725	-0.479994	3.25732	18.9142	9.97305e-09	2.83056e-07
GADL1	-0.804337	-1.45051	-0.646176	1.68175	18.9129	9.98517e-09	2.8322e-07
AFAP1	0.366195	-1.02199	-1.38818	1.94271	18.9049	1.00609e-08	2.85006e-07
LOC105376014	0.250702	1.08501	0.834313	2.83758	18.887	1.02339e-08	2.8954e-07
LOC105373285	1.89741	0.763703	-1.1337	2.99985	18.8799	1.03032e-08	2.91315e-07
ACP1	-0.528479	-1.1602	-0.631723	3.43749	18.8708	1.03922e-08	2.93275e-07
LOC105378198	-1.88239	-0.0279449	1.85444	2.08497	18.8613	1.04862e-08	2.95181e-07
CSRP2	-0.750676	-1.39999	-0.649316	2.13732	18.8588	1.05111e-08	2.95694e-07
LOC102724110	-1.74746	-1.04179	0.705672	2.37412	18.8371	1.07306e-08	3.013e-07
RPS23	-0.61907	-1.06003	-0.440956	2.89011	18.8313	1.07898e-08	3.02771e-07
UCHL5	0.114202	-0.940122	-1.05432	3.91354	18.8204	1.09017e-08	3.05528e-07
PPT1	0.136593	-0.931337	-1.06793	3.25104	18.8142	1.0966e-08	3.06945e-07
LOC105373737	1.07875	1.17667	0.0979144	1.27963	18.8047	1.10647e-08	3.0932e-07
LOC102723897	1.14733	0.341478	-0.805852	4.08114	18.8023	1.10906e-08	3.09849e-07
ANXA10	-0.669678	-1.20648	-0.536797	0.886521	18.7961	1.11557e-08	3.11473e-07
ATP6V1F	-0.26438	-1.04509	-0.780706	3.7037	18.7923	1.1196e-08	3.12207e-07
LOC400002	0.20201	-1.08181	-1.28382	3.11724	18.7882	1.124e-08	3.1324e-07
CCDC28A	-0.859168	-1.14067	-0.281504	3.00783	18.7669	1.14696e-08	3.18973e-07
LOC101927089	-0.276033	-1.29501	-1.01897	3.76985	18.7554	1.15953e-08	3.22136e-07
LOC100287042	-0.453041	0.980154	1.4332	2.25834	18.7247	1.19386e-08	3.31467e-07
ADGRG6	-1.89353	-0.0953513	1.79818	1.80372	18.7223	1.19655e-08	3.32007e-07
LOC100130476	-0.465149	-1.41719	-0.95204	3.01346	18.7094	1.2113e-08	3.35891e-07
LOC100289404	0.875702	1.04636	0.170653	0.790194	18.6902	1.2336e-08	3.41389e-07
LOC105374428	0.42789	1.12101	0.693121	0.911767	18.663	1.26587e-08	3.49938e-07
LOC100132167	0.0705057	1.03543	0.964928	3.6949	18.6416	1.29182e-08	3.56227e-07
LOC105374418	-1.11525	-1.22654	-0.111291	3.09323	18.6384	1.29578e-08	3.571e-07
TPTE2P6	1.1721	-0.587772	-1.75987	2.8904	18.6252	1.3122e-08	3.60955e-07
KLC2	0.225782	-0.817627	-1.04341	4.05317	18.6168	1.32264e-08	3.63605e-07
RPSA	0.0117686	-1.0881	-1.09987	2.84578	18.6118	1.32899e-08	3.65124e-07
LGSN	0.854995	-0.533384	-1.38838	4.13734	18.6055	1.33697e-08	3.66864e-07
LOC105370259	-1.60406	-0.784091	0.819965	0.908207	18.6042	1.33863e-08	3.67095e-07
OR2L13	-0.721506	0.401105	1.12261	4.15061	18.5941	1.35146e-08	3.70387e-07
GOLGA6L22	-0.43939	0.764081	1.20347	3.02235	18.5626	1.39254e-08	3.81411e-07
PVT1	0.808806	-0.58093	-1.38974	3.59953	18.5489	1.41082e-08	3.85943e-07
BDH2	-0.963214	-1.14886	-0.185641	2.86731	18.5395	1.42335e-08	3.88896e-07
ZNF385A	0.938625	-0.531601	-1.47023	3.58008	18.5276	1.43956e-08	3.93085e-07
RINT1	-0.377909	-1.18268	-0.804775	3.14365	18.5256	1.44228e-08	3.93585e-07
CCDC64B	-1.13576	-1.46504	-0.329281	1.57589	18.5088	1.46558e-08	3.997e-07
UNC93B8	-0.267894	0.812491	1.08038	3.49999	18.5059	1.46962e-08	4.00556e-07
FAM104A	0.094409	-0.988495	-1.0829	3.66479	18.4998	1.47818e-08	4.02645e-07
LOC105376732	-0.12907	-1.17107	-1.042	3.38909	18.492	1.48908e-08	4.05365e-07
TEKT4	-1.79735	-0.395473	1.40187	1.18764	18.4913	1.49008e-08	4.05391e-07
JKAMP	0.0739789	-1.01076	-1.08473	2.97926	18.4815	1.50401e-08	4.08835e-07
HMCES	0.353257	-1.06623	-1.41948	2.61627	18.4811	1.50457e-08	4.08835e-07
SRSF11P1	1.26005	1.05563	-0.20442	2.93057	18.4747	1.51381e-08	4.10845e-07
WSCD1	0.241926	-1.00064	-1.24256	1.98146	18.4614	1.53302e-08	4.15554e-07
LOC105376211	-0.135279	-1.1356	-1.00032	0.831328	18.4355	1.57119e-08	4.25383e-07
CSTF2	-0.662176	-1.28963	-0.627455	2.92124	18.4096	1.61036e-08	4.35196e-07
BTF3	-0.785187	-1.20516	-0.419969	2.9476	18.3995	1.62586e-08	4.38855e-07
DACT2	0.99583	1.06074	0.0649086	0.71079	18.3958	1.63163e-08	4.40145e-07
BUD31	-0.157458	-1.27037	-1.11291	2.73302	18.3773	1.6606e-08	4.4688e-07
MOGAT3	0.191793	1.2388	1.047	2.16097	18.375	1.6643e-08	4.47607e-07
SNORA19	-1.26242	0.137869	1.40029	0.670569	18.3412	1.71852e-08	4.61064e-07
CES3	0.132004	-0.975635	-1.10764	2.28816	18.3406	1.7195e-08	4.61064e-07
ARPC3	-0.447747	-1.10392	-0.65617	2.78671	18.3347	1.72914e-08	4.6337e-07
COL26A1	-1.24593	-1.11945	0.126484	1.8935	18.3148	1.76221e-08	4.71384e-07
MED28	0.314574	-1.06162	-1.3762	1.69619	18.3119	1.76707e-08	4.724e-07
LOC105369857	-1.45796	-1.19031	0.267653	2.21865	18.2932	1.79885e-08	4.80322e-07
PSMC3	-0.0247897	-1.09396	-1.06917	3.36116	18.2906	1.80323e-08	4.80915e-07
OR3A1	1.0479	1.03278	-0.0151244	3.77577	18.2778	1.82529e-08	4.85928e-07
LRRC69	1.02591	1.16946	0.14355	2.02277	18.2692	1.84022e-08	4.89611e-07
RANBP17	-0.743708	-1.13502	-0.391314	2.1832	18.2551	1.86521e-08	4.9508e-07
EAPP	0.302283	-0.889068	-1.19135	2.64776	18.2541	1.86686e-08	4.95223e-07
GPC5-AS2	-0.283437	-1.38359	-1.10015	2.46436	18.2458	1.88171e-08	4.9857e-07
IQSEC3P3	0.508033	-1.07476	-1.58279	1.42594	18.2441	1.88469e-08	4.99062e-07
FAM47E	-0.996839	-1.30371	-0.306876	2.2822	18.2122	1.9428e-08	5.13537e-07
NECAP1	-0.332896	-1.14511	-0.812213	3.43883	18.1964	1.97226e-08	5.21014e-07
FAHD2B	0.397609	-0.918045	-1.31565	3.406	18.1937	1.9772e-08	5.22011e-07
LOC105379254	-0.432713	1.0746	1.50731	2.30035	18.1603	2.04109e-08	5.37608e-07
DPM2	-0.366439	-1.2959	-0.929463	2.34047	18.159	2.04363e-08	5.37959e-07
HIF1A-AS2	-0.0878995	1.10445	1.19235	2.86708	18.1495	2.06214e-08	5.42511e-07
LOC101928567	-0.865288	0.735656	1.60094	2.76176	18.0897	2.18286e-08	5.73932e-07
TTC8	-0.792059	-1.00143	-0.209369	3.84711	18.0747	2.21411e-08	5.81123e-07
DPRXP5	-0.478018	0.885181	1.3632	3.11989	18.0708	2.22233e-08	5.82938e-07
KIF22	-0.204673	-1.06078	-0.856105	1.70693	18.0563	2.25327e-08	5.90705e-07
RABAC1	0.2853	-0.919123	-1.20442	3.4999	18.0515	2.26364e-08	5.93077e-07
SGCG	1.48051	1.10629	-0.374214	3.13826	18.0468	2.27379e-08	5.95387e-07
LOC285766	1.65269	1.09945	-0.553248	1.30891	18.0336	2.30238e-08	6.01814e-07
SGK223	0.196722	-1.12819	-1.32491	2.36512	18.0052	2.36539e-08	6.17922e-07
ADGRB1	1.24888	0.214049	-1.03483	3.57064	18.0004	2.3764e-08	6.20434e-07
LINC00998	-0.573467	-1.3199	-0.746432	2.42339	17.9733	2.43846e-08	6.34412e-07
LOC105373199	-1.32067	0.381552	1.70222	1.74212	17.9403	2.51622e-08	6.52449e-07
LOC645166	0.111085	-1.11358	-1.22467	2.8186	17.9397	2.51749e-08	6.52449e-07
USP17L6P	0.0581646	-1.26339	-1.32155	1.52158	17.9255	2.55185e-08	6.60831e-07
FBXO22	-0.020406	-1.08108	-1.06067	3.27626	17.9222	2.55978e-08	6.62117e-07
OR7A2P	-0.639278	0.73968	1.37896	3.24271	17.918	2.57009e-08	6.644e-07
LINC01483	1.35311	0.980684	-0.372429	1.47004	17.9087	2.59297e-08	6.69141e-07
SERPINI2	1.5563	0.918578	-0.637727	1.72373	17.905	2.60213e-08	6.70739e-07
SMARCE1	-0.826765	-1.07821	-0.251444	3.33565	17.8989	2.61735e-08	6.74274e-07
LYL1	-0.884728	0.241513	1.12624	0.82491	17.8837	2.65528e-08	6.83257e-07
MAB21L2	-0.549672	-1.45674	-0.907066	2.95215	17.883	2.65727e-08	6.83374e-07
EEF1DP4	0.923179	1.28307	0.359888	2.27783	17.8629	2.7085e-08	6.95748e-07
RNASEK	-0.323372	-1.04931	-0.725935	3.20303	17.8598	2.71635e-08	6.97364e-07
PNPLA4	0.103477	-1.02321	-1.12668	2.97069	17.8382	2.77277e-08	7.11029e-07
LOC105373609	-0.460047	0.690996	1.15104	3.54707	17.8116	2.84386e-08	7.27171e-07
SLC2A9	1.1084	1.0997	-0.00869495	1.34187	17.7895	2.90457e-08	7.41845e-07
C3ORF67-AS1	1.39226	1.06488	-0.327383	3.19364	17.7819	2.92554e-08	7.4592e-07
MOSPD2	-0.345225	-1.03324	-0.688014	2.3824	17.7794	2.93263e-08	7.47303e-07
LOC401320	-1.38433	-0.383856	1.00048	3.36608	17.7728	2.9509e-08	7.5153e-07
CST13P	-0.823981	0.40712	1.2311	0.508304	17.7449	3.0305e-08	7.70921e-07
USP17L13	0.0234361	-1.04341	-1.06685	0.702358	17.7354	3.05786e-08	7.77438e-07
SPRTN	0.268505	-1.02784	-1.29635	3.12479	17.7201	3.10291e-08	7.87099e-07
AGAP10P	-1.52691	-0.886698	0.640213	2.29547	17.7173	3.11108e-08	7.88337e-07
GADD45A	0.249093	-1.23812	-1.48721	2.03113	17.7172	3.11132e-08	7.88337e-07
TUBA8	-0.469982	-1.16946	-0.699481	3.81341	17.7091	3.13535e-08	7.93074e-07
COL4A2	-0.533573	-1.00935	-0.475777	4.25846	17.7052	3.14712e-08	7.95546e-07
LOC105370616	-0.506326	0.857533	1.36386	2.38223	17.6939	3.18131e-08	8.02881e-07
LINC00202-1	1.74607	1.05739	-0.688675	3.00358	17.6835	3.21276e-08	8.10108e-07
FOXP2	-1.33987	-0.118056	1.22181	3.75916	17.6833	3.21358e-08	8.10108e-07
LGALS1	-0.219743	-1.05136	-0.831613	3.72959	17.6693	3.25645e-08	8.18605e-07
LOC102723660	-1.59669	-0.335662	1.26103	1.03176	17.637	3.35845e-08	8.42348e-07
CFHR4	-0.91411	0.762596	1.67671	1.90227	17.6278	3.38787e-08	8.48298e-07
GABRD	0.737019	-0.393378	-1.1304	4.43436	17.6271	3.38999e-08	8.48353e-07
BACH1	-0.250498	-1.10367	-0.853176	2.8196	17.6224	3.40546e-08	8.50792e-07
LOC100294362	1.11708	0.601385	-0.515699	4.18485	17.6199	3.41352e-08	8.5233e-07
MST1L	0.231266	-0.934855	-1.16612	0.98953	17.6021	3.47186e-08	8.64962e-07
GEN1	0.122374	-0.884632	-1.00701	3.89529	17.5934	3.50067e-08	8.71531e-07
CMTM6	0.931327	1.08547	0.154145	3.29684	17.593	3.50213e-08	8.71531e-07
LOC105370555	1.48156	1.06563	-0.415932	3.14703	17.5918	3.50586e-08	8.71974e-07
RNF181	0.192079	-1.13277	-1.32485	2.12673	17.5861	3.52509e-08	8.76268e-07
HDDC2	-0.808735	-1.16693	-0.358199	2.1702	17.5628	3.60417e-08	8.9493e-07
NHP2	-0.327322	-1.17122	-0.843898	2.32035	17.5579	3.62097e-08	8.986e-07
LOC105371717	-0.120759	-1.23794	-1.11718	1.48844	17.5493	3.65077e-08	9.0499e-07
PSMB7	-0.314626	-1.0032	-0.688577	3.65627	17.5387	3.68783e-08	9.1367e-07
LOC105377419	0.95243	1.35588	0.403455	1.6611	17.5295	3.72028e-08	9.21197e-07
CPZ	0.154213	1.04356	0.889346	0.729943	17.5194	3.75632e-08	9.29091e-07
FAM195B	1.08824	-0.497346	-1.58558	3.56823	17.5086	3.79509e-08	9.37642e-07
ADCYAP1	0.211939	-1.15447	-1.36641	3.18771	17.4951	3.84419e-08	9.49209e-07
LOC101060038	0.429257	1.11708	0.687822	1.09252	17.4946	3.84616e-08	9.49209e-07
LOC101930171	1.22094	0.99477	-0.226166	0.822495	17.4923	3.85466e-08	9.5078e-07
TCAF1P1	0.133091	-1.12314	-1.25623	2.82815	17.4894	3.86518e-08	9.52324e-07
GNG13	-0.22363	-1.3856	-1.16197	2.83492	17.4828	3.88948e-08	9.57254e-07
DRICH1	1.94735	0.40937	-1.53798	2.48894	17.4762	3.91421e-08	9.62808e-07
LOC105370323	-0.228217	-1.42208	-1.19387	2.59918	17.4467	4.0256e-08	9.89664e-07
CTGLF11P	-1.80622	-0.386459	1.41976	2.64923	17.4434	4.03845e-08	9.92074e-07
TMEM189-UBE2V1	0.471521	-0.754143	-1.22566	3.60428	17.3897	4.25046e-08	1.03979e-06
LOC100128906	0.180112	1.11426	0.934151	1.60569	17.3736	4.31597e-08	1.05466e-06
RPS4X	-0.0467066	-1.13829	-1.09158	2.17613	17.3711	4.32641e-08	1.05663e-06
LOC105371517	1.07951	1.085	0.0054839	1.55579	17.3698	4.33174e-08	1.05736e-06
VN1R101P	-0.152107	-1.05508	-0.902972	0.754354	17.3587	4.37769e-08	1.06799e-06
LOC101927108	1.33066	1.08164	-0.249018	1.96992	17.3413	4.45092e-08	1.08349e-06
ASTE1	0.0872892	-1.09599	-1.18328	2.87156	17.3329	4.48699e-08	1.08989e-06
CLUH	1.29113	1.04225	-0.248872	2.97406	17.3303	4.49803e-08	1.09198e-06
PLCD4	1.33535	-0.0654413	-1.40079	4.14927	17.3179	4.55141e-08	1.10374e-06
SULT1A2	0.201941	-1.11658	-1.31852	2.41047	17.3058	4.60415e-08	1.11471e-06
LOC105371308	-0.139094	1.29918	1.43828	3.15283	17.3021	4.62056e-08	1.11808e-06
TRNQ	0.0794919	1.02817	0.948681	1.28598	17.2995	4.63185e-08	1.1202e-06
PVRL1	0.514344	-0.764635	-1.27898	3.27758	17.2987	4.63569e-08	1.12052e-06
RPS13	-0.425183	-1.12978	-0.704598	2.67854	17.2809	4.71471e-08	1.13716e-06
RNA5-8SP2	-0.520887	0.949579	1.47047	1.70552	17.2716	4.75671e-08	1.14543e-06
LOC102724663	-1.15702	-1.06019	0.0968258	2.9353	17.249	4.86054e-08	1.16792e-06
FAM230B	-0.405073	0.885278	1.29035	1.57028	17.2101	5.04408e-08	1.20877e-06
LOC105372348	1.85066	1.0312	-0.819461	2.05103	17.1779	5.20109e-08	1.24306e-06
CYP2E1	-0.187584	-1.26429	-1.0767	2.29382	17.1761	5.20993e-08	1.2445e-06
LOC105379512	-0.109979	-1.05559	-0.945609	0.966888	17.1736	5.22276e-08	1.2469e-06
ANKRD34B	-0.0378628	-1.17656	-1.13869	1.16815	17.1447	5.36871e-08	1.27807e-06
PIGC	0.561504	-1.04734	-1.60884	2.46503	17.1445	5.36949e-08	1.27807e-06
SYCE1	0.21236	-1.06834	-1.2807	3.31685	17.1302	5.44337e-08	1.29334e-06
IPCEF1	-1.01893	-0.805826	0.213108	1.74512	17.1123	5.53717e-08	1.31353e-06
ARHGAP31	1.42317	0.0387269	-1.38444	2.61658	17.0984	5.61105e-08	1.32894e-06
LOC101927511	0.854626	1.20976	0.355138	1.24246	17.0972	5.61726e-08	1.32971e-06
PGM5P3-AS1	-0.490654	0.875347	1.366	1.28519	17.0675	5.77861e-08	1.36501e-06
BANF1	-0.480182	-1.17088	-0.690702	2.90374	17.0283	5.99861e-08	1.41323e-06
LOC100288911	0.335714	-1.14928	-1.48499	1.81027	17.0269	6.00685e-08	1.41443e-06
NPHP4	-0.00624357	-1.03808	-1.03184	3.33498	17.0243	6.02177e-08	1.41719e-06
MYO18B	-1.24298	-1.26152	-0.0185352	3.47762	17.0138	6.08243e-08	1.42996e-06
RAC1P2	-1.08376	-1.14687	-0.0631086	1.74309	16.9999	6.16383e-08	1.44605e-06
ZDHHC6	-0.435577	-1.22505	-0.789478	2.71041	16.9856	6.24805e-08	1.46504e-06
LOC101928236	0.872438	1.19184	0.3194	2.92214	16.9728	6.32493e-08	1.48151e-06
GDPD5	1.33342	0.064155	-1.26926	3.94092	16.9529	6.44603e-08	1.50672e-06
GSAP	0.390946	-0.657859	-1.04881	4.05301	16.9437	6.50318e-08	1.51848e-06
SLC9A8	-0.334801	-1.03879	-0.703985	3.30994	16.9385	6.53524e-08	1.52438e-06
SNRNP40	-0.495591	-1.0589	-0.563309	2.8969	16.9239	6.62711e-08	1.545e-06
RIOK2	-0.176785	-1.12737	-0.950586	2.60123	16.9172	6.66921e-08	1.554e-06
TMEM62	0.26411	-0.914908	-1.17902	3.49241	16.9126	6.69874e-08	1.56007e-06
LOC105369605	-0.358685	-1.42341	-1.06473	2.34848	16.8729	6.95774e-08	1.61592e-06
PLEKHG6	-0.402174	0.998092	1.40027	2.25253	16.8705	6.97313e-08	1.61806e-06
BCAP31	0.441485	-0.93591	-1.3774	2.88965	16.8623	7.0285e-08	1.62753e-06
SIAE	0.148027	-0.916375	-1.0644	3.78127	16.8615	7.03328e-08	1.62779e-06
VAV2	0.333879	-0.872903	-1.20678	1.39183	16.8533	7.08888e-08	1.63981e-06
DISC1FP1	0.894679	1.21013	0.315448	3.10088	16.8521	7.09691e-08	1.64082e-06
GRID2IP	1.21747	0.709284	-0.508186	4.36747	16.8511	7.10379e-08	1.64156e-06
ASAH2B	-0.622612	-1.22508	-0.602472	1.48288	16.8485	7.1213e-08	1.64475e-06
SLC22A25	-0.0659814	1.03629	1.10227	2.47354	16.8477	7.12683e-08	1.64518e-06
LOC105369858	-1.40725	-1.05678	0.350475	2.54666	16.8406	7.17556e-08	1.65471e-06
C3ORF67	1.34487	0.923843	-0.421024	3.48161	16.8386	7.189e-08	1.65696e-06
RRN3	-0.38622	-1.04298	-0.656756	3.44964	16.8378	7.19456e-08	1.65739e-06
LOC105379474	1.33877	1.11883	-0.219935	1.09147	16.8183	7.3298e-08	1.68506e-06
LOC105377535	-0.847777	0.722058	1.56984	1.34415	16.81	7.38808e-08	1.69759e-06
ZNF583	0.478831	-0.949921	-1.42875	2.68285	16.8	7.45868e-08	1.71293e-06
ZNF821	-0.240387	-1.01947	-0.779078	3.11001	16.7759	7.63201e-08	1.75093e-06
SLC7A6OS	-0.132754	-1.21558	-1.08282	1.87987	16.7452	7.8593e-08	1.79845e-06
LOC101929378	-0.280717	-1.1485	-0.867784	1.71086	16.7366	7.9243e-08	1.8124e-06
CHKB-CPT1B	-0.164055	-1.05515	-0.891098	3.57529	16.7298	7.97605e-08	1.82144e-06
ITPK1-AS1	-0.342718	-1.23958	-0.896861	1.64157	16.7107	8.12226e-08	1.85104e-06
RASEF	-0.410589	0.694474	1.10506	3.07529	16.6828	8.34197e-08	1.89434e-06
MCAM	0.255257	-0.917559	-1.17282	3.41619	16.6763	8.39402e-08	1.90422e-06
FTLP19	-0.565155	-1.16214	-0.596981	0.821624	16.6635	8.49661e-08	1.92554e-06
STOX1	-0.313369	-1.07376	-0.760391	1.33115	16.6522	8.58868e-08	1.93943e-06
LOC105375510	-0.0165754	-1.27001	-1.25343	2.36388	16.651	8.59885e-08	1.93985e-06
LOC150776	1.00638	-0.152167	-1.15854	3.82025	16.6387	8.70025e-08	1.95876e-06
TMEM110-MUSTN1	-0.380609	-1.21335	-0.83274	2.43373	16.6264	8.80333e-08	1.97997e-06
LOC105379452	1.88897	0.624402	-1.26456	1.96487	16.6164	8.88768e-08	1.99794e-06
ABCD1P5	-1.38905	0.411501	1.80055	1.46953	16.5782	9.21776e-08	2.0659e-06
PTCHD1	-1.13198	0.377025	1.50901	1.39113	16.5746	9.24974e-08	2.07187e-06
RNF208	1.70611	0.729313	-0.976802	3.19867	16.5741	9.25367e-08	2.07187e-06
IFNAR2	0.92522	-0.356415	-1.28163	3.82044	16.5554	9.42059e-08	2.10607e-06
CHRNB3	-0.760304	-1.3626	-0.602299	1.40089	16.553	9.44246e-08	2.1099e-06
CYP2C19	0.943227	1.0196	0.0763727	1.15509	16.5403	9.55809e-08	2.13147e-06
LY86-AS1	0.186155	-0.886414	-1.07257	1.53332	16.5364	9.59367e-08	2.13727e-06
LOC105371488	0.179419	1.08734	0.907916	1.8348	16.5069	9.86785e-08	2.19288e-06
LINC00331	-1.01032	0.509262	1.51958	1.0612	16.498	9.95147e-08	2.20927e-06
CALB2	0.753521	-0.864605	-1.61813	2.0598	16.4731	1.01916e-07	2.26032e-06
PARVB	1.3178	0.250704	-1.0671	4.2077	16.4577	1.03423e-07	2.29035e-06
GRM4	0.680436	-0.711308	-1.39174	3.5813	16.4514	1.04043e-07	2.30178e-06
GBP2	1.07448	1.23469	0.160209	1.383	16.4464	1.04551e-07	2.31187e-06
FAM173A	-0.0114968	-1.16502	-1.15352	2.73531	16.4414	1.05046e-07	2.31891e-06
LOC105375356	-0.0739352	1.06183	1.13576	3.39483	16.4397	1.05218e-07	2.32088e-06
LOC442028	-0.834069	0.644905	1.47897	2.60237	16.4374	1.0545e-07	2.32485e-06
ZFHX2	0.728773	1.0527	0.323925	3.08048	16.426	1.06602e-07	2.34738e-06
LOC100506571	-0.348099	0.974723	1.32282	2.68295	16.4138	1.07854e-07	2.37082e-06
SUSD2	1.68926	-0.12351	-1.81277	2.04025	16.3823	1.11154e-07	2.43976e-06
LOC105372835	-0.223004	-1.12212	-0.899117	1.01724	16.3791	1.11485e-07	2.44583e-06
FUCA2	-0.658602	-1.05146	-0.392857	3.71637	16.3681	1.12664e-07	2.46926e-06
HPS5	0.151133	-1.01775	-1.16888	2.95995	16.3673	1.12758e-07	2.4701e-06
MINK1	0.60368	-0.570592	-1.17427	3.74384	16.3667	1.1282e-07	2.47026e-06
GNL3	0.502973	-0.83023	-1.3332	2.92848	16.3539	1.14203e-07	2.4981e-06
YWHAZP5	-0.976026	-1.40625	-0.430225	2.69569	16.327	1.17177e-07	2.55812e-06
IGFBP6	0.124537	-1.25874	-1.38328	2.64596	16.324	1.17512e-07	2.56168e-06
C12ORF75	0.504179	-0.902146	-1.40632	3.90354	16.3205	1.1791e-07	2.5691e-06
PLD4	1.1879	0.12798	-1.05992	4.54063	16.3163	1.18382e-07	2.57562e-06
LOC105372538	-0.406608	-1.37374	-0.967129	2.35421	16.314	1.18642e-07	2.58001e-06
SNHG17	0.391578	-1.02418	-1.41575	2.48592	16.3119	1.18889e-07	2.58413e-06
ANKDD1B	1.08945	1.1765	0.0870459	1.82661	16.3035	1.19839e-07	2.60352e-06
ZER1	0.908076	-0.332385	-1.24046	3.73694	16.2587	1.25088e-07	2.70963e-06
TP53INP2	1.11959	1.13271	0.013118	2.77252	16.2572	1.25267e-07	2.7122e-06
LOC101926985	0.667526	1.057	0.38947	0.878961	16.2444	1.26801e-07	2.74009e-06
PAPD7	0.277247	-0.815625	-1.09287	3.72529	16.2385	1.27523e-07	2.75036e-06
HSBP1L1	-0.480585	-1.17604	-0.695452	3.43908	16.2333	1.28162e-07	2.76282e-06
LINC00605	-0.906662	0.711702	1.61836	1.70459	16.2268	1.28954e-07	2.77856e-06
CYB5R1	0.173947	-1.03249	-1.20644	3.32498	16.2111	1.30909e-07	2.81931e-06
LOC105374187	1.2789	1.06725	-0.211657	1.38278	16.2032	1.31905e-07	2.83528e-06
LRRC4	0.294686	-0.745303	-1.03999	0.83256	16.1931	1.33179e-07	2.85993e-06
MIR8485	-0.679668	-1.44012	-0.76045	2.11928	16.1911	1.33431e-07	2.86396e-06
GOLGA8EP	-1.19533	-1.26506	-0.069732	2.01235	16.1811	1.34723e-07	2.8889e-06
NAT14	1.44192	0.970462	-0.471458	3.01013	16.1701	1.36145e-07	2.9152e-06
LOC105369820	1.3071	1.00829	-0.298813	1.70246	16.1542	1.38229e-07	2.957e-06
VIM	1.36757	0.674584	-0.692989	0.863681	16.1534	1.38327e-07	2.95766e-06
DNM1P30	-0.154403	0.992688	1.14709	2.4626	16.1278	1.41758e-07	3.02668e-06
TBC1D3P1-DHX40P1	1.58347	1.01127	-0.572197	1.62174	16.1021	1.4528e-07	3.09449e-06
DNAJC21	0.721292	-0.477476	-1.19877	3.9535	16.0995	1.45646e-07	3.1008e-06
MTBP	-0.50769	-1.08327	-0.575584	3.44118	16.0939	1.46434e-07	3.1146e-06
ACTN1	-0.402219	-1.00527	-0.60305	2.57346	16.0834	1.47901e-07	3.14281e-06
PUS10	0.494533	-0.816069	-1.3106	3.25152	16.082	1.48112e-07	3.14579e-06
PSEN2	0.80743	-0.85996	-1.66739	2.72849	16.0446	1.53494e-07	3.25083e-06
RPL23AP63	0.990745	1.32555	0.334804	1.49487	16.0335	1.55138e-07	3.28408e-06
GRIN1	1.15382	0.326759	-0.827061	3.97785	16.0295	1.55736e-07	3.29362e-06
FOS	1.23126	0.879542	-0.351722	1.61551	16.0269	1.56113e-07	3.30003e-06
SNORD3B-2	-1.04427	0.619271	1.66354	1.29893	16.0218	1.56886e-07	3.31323e-06
LOC105375101	0.883607	-0.828684	-1.71229	1.5315	15.9982	1.60464e-07	3.37602e-06
EXOSC10	0.264448	-0.767654	-1.0321	3.30281	15.9939	1.6112e-07	3.38503e-06
LAMTOR1	0.81926	-0.732266	-1.55153	2.51734	15.9909	1.61591e-07	3.39107e-06
OSTC	0.257488	-1.03842	-1.29591	2.70533	15.9897	1.6177e-07	3.39107e-06
LOC101927711	-1.3656	0.0282912	1.39389	0.854112	15.9524	1.67657e-07	3.51081e-06
ABHD8	0.780942	-0.766503	-1.54745	2.50632	15.9477	1.68404e-07	3.5248e-06
ASL	0.543391	-0.947984	-1.49138	3.03772	15.9398	1.69679e-07	3.54817e-06
TRAPPC3L	-0.757623	0.790384	1.54801	1.78065	15.939	1.69806e-07	3.54916e-06
RTN4RL1	0.713759	-0.485873	-1.19963	3.93864	15.9356	1.70373e-07	3.55895e-06
C10ORF126	-0.690118	0.861619	1.55174	2.03893	15.9352	1.70434e-07	3.55895e-06
LOC105378019	-0.650705	-1.35147	-0.700769	2.74541	15.9174	1.73353e-07	3.61578e-06
CCDC12	-0.568228	-1.13249	-0.564262	3.0016	15.9165	1.73505e-07	3.6163e-06
MAPK8IP2	1.32301	0.704738	-0.618271	3.82738	15.8966	1.76846e-07	3.67906e-06
ZNF75A	-0.368824	-1.09855	-0.729727	3.43045	15.894	1.77288e-07	3.68483e-06
APMAP	0.0698614	-0.990669	-1.06053	2.84841	15.8839	1.79e-07	3.71696e-06
NPY1R	-1.03421	-0.0603928	0.973813	0.466949	15.8779	1.80043e-07	3.73688e-06
LOC105378806	0.95196	1.18132	0.229362	1.23648	15.8641	1.82426e-07	3.78283e-06
LOC102546294	0.850112	1.0084	0.158286	2.77052	15.8619	1.8281e-07	3.78902e-06
GPR35	1.46401	1.11637	-0.347637	1.69121	15.8324	1.88041e-07	3.88662e-06
FAM26D	-0.994911	0.634628	1.62954	1.55928	15.8298	1.88526e-07	3.88975e-06
TRPM2-AS	1.30839	-0.281465	-1.58986	3.77331	15.8297	1.88534e-07	3.88975e-06
BZW1	-0.186327	-1.01617	-0.829843	3.52053	15.8274	1.88959e-07	3.89657e-06
PIH1D1	-0.0407122	-1.12616	-1.08544	2.50676	15.8111	1.91912e-07	3.95017e-06
SNORD3C	-0.897852	0.740433	1.63828	1.34454	15.8089	1.92318e-07	3.95669e-06
POLR2K	-0.582374	-1.15796	-0.575585	3.29893	15.792	1.9546e-07	4.01209e-06
LOC105370509	-0.872932	-1.0878	-0.214863	0.841711	15.7904	1.95755e-07	4.0163e-06
HCN1	-1.16997	-0.411236	0.758737	3.4509	15.7713	1.9937e-07	4.08672e-06
LOC401191	1.29842	1.14047	-0.157956	2.05032	15.7641	2.00752e-07	4.11315e-06
LOC100287046	-0.390249	0.723995	1.11424	2.46931	15.7623	2.01095e-07	4.11831e-06
SNORD114-2	0.152351	-1.15128	-1.30363	3.65031	15.7564	2.02245e-07	4.13995e-06
LOC101929295	0.734964	1.10077	0.365809	2.94311	15.7465	2.04164e-07	4.17732e-06
SNORA18	-0.155829	-1.03502	-0.879192	0.961363	15.7206	2.09292e-07	4.2744e-06
GPR3	1.50403	1.11564	-0.388386	1.9108	15.7149	2.1043e-07	4.29567e-06
SCART1	0.631501	-0.850441	-1.48194	1.1593	15.6764	2.18341e-07	4.44497e-06
CIAPIN1	-0.0302022	-1.04607	-1.01586	3.49321	15.6716	2.19333e-07	4.46314e-06
LOC100420083	0.335049	1.1171	0.782047	1.64172	15.6699	2.19704e-07	4.46864e-06
BCO1	1.32916	1.02584	-0.303315	1.53412	15.6622	2.21311e-07	4.49519e-06
MS4A4E	-0.0231116	-1.10776	-1.08464	2.42927	15.6405	2.25965e-07	4.58138e-06
FAM45B	1.29599	-0.436786	-1.73278	1.47027	15.623	2.29783e-07	4.65246e-06
LOC105373834	0.566513	1.04535	0.478834	1.78103	15.6042	2.33967e-07	4.73288e-06
LOC105373275	-0.624391	0.753862	1.37825	3.33337	15.588	2.37612e-07	4.80226e-06
LOC100113421	1.0648	1.18106	0.116263	2.0576	15.5798	2.39495e-07	4.82938e-06
AP4B1	-0.40385	-1.18958	-0.785733	2.45483	15.5791	2.39651e-07	4.83034e-06
ANXA2	0.715299	-0.573665	-1.28896	4.47882	15.56	2.4408e-07	4.91296e-06
SLC37A2	-0.32954	-1.05624	-0.726696	2.82283	15.5477	2.46966e-07	4.96435e-06
LOC105378080	-1.09457	0.213091	1.30766	1.14687	15.5334	2.50381e-07	5.02167e-06
RMDN2-AS1	-0.56537	-1.18178	-0.616407	2.72524	15.5308	2.51e-07	5.03183e-06
KCNQ1	0.496141	1.01341	0.517271	2.41931	15.5157	2.54645e-07	5.10033e-06
ABCG8	-0.515494	-1.15563	-0.640136	2.55607	15.5108	2.55842e-07	5.122e-06
UFC1	-0.88668	-1.20111	-0.314434	2.0976	15.5072	2.56721e-07	5.13499e-06
MFSD3	0.2029	-1.10717	-1.31007	2.39317	15.4942	2.5994e-07	5.19035e-06
COPE	-0.151483	-1.06177	-0.910286	2.64528	15.4867	2.61829e-07	5.22312e-06
LOC105370936	1.3673	1.20453	-0.162766	2.21694	15.4851	2.62217e-07	5.22675e-06
WEE2-AS1	1.59632	-0.114554	-1.71088	2.42671	15.4846	2.62345e-07	5.22675e-06
ATP6AP1	-0.453939	-1.01634	-0.5624	3.09271	15.4808	2.6332e-07	5.24349e-06
KATNAL2	1.13448	0.483988	-0.650496	4.1164	15.4756	2.64635e-07	5.26733e-06
SNORD3B-1	-1.00301	0.620214	1.62323	1.2886	15.4739	2.65056e-07	5.27337e-06
DBH-AS1	1.13012	-0.6809	-1.81102	1.82453	15.4682	2.66515e-07	5.29531e-06
ARL1	0.0819542	-1.04127	-1.12322	3.07257	15.4617	2.68176e-07	5.32121e-06
GOLGA8O	1.29033	1.10378	-0.186548	1.68116	15.4553	2.6981e-07	5.35124e-06
UBN1	0.617202	-0.767156	-1.38436	3.04772	15.4496	2.71306e-07	5.37376e-06
LOC105373714	0.906738	1.17256	0.265823	2.1513	15.4223	2.78489e-07	5.51115e-06
RRAGA	-0.104146	-1.08127	-0.977125	3.00753	15.4187	2.79459e-07	5.52789e-06
LOC105371807	-0.710736	-1.29003	-0.579299	1.37443	15.4182	2.79586e-07	5.52795e-06
ARF1	0.910346	-0.164609	-1.07495	3.77721	15.4129	2.81015e-07	5.55374e-06
FLJ45513	-0.798082	0.21153	1.00961	0.453847	15.4078	2.82376e-07	5.57571e-06
LRRC66	1.22407	1.13909	-0.0849769	3.34734	15.3927	2.86483e-07	5.64682e-06
PRKAG1	0.353941	-0.763053	-1.11699	3.81515	15.3921	2.86654e-07	5.64769e-06
SUMO1	-0.151561	-1.00993	-0.858367	3.27007	15.3715	2.9236e-07	5.74996e-06
FLRT1	0.430203	-0.874483	-1.30469	2.25675	15.3356	3.026e-07	5.93306e-06
MUC20	-0.942426	0.692283	1.63471	2.3368	15.3211	3.06826e-07	6.01327e-06
GOLGA6L5P	1.39286	1.16249	-0.230368	2.23164	15.3108	3.09869e-07	6.06923e-06
LOC105379473	1.28021	1.03451	-0.245707	1.01142	15.3072	3.10946e-07	6.08334e-06
HDHD1	-0.367349	-1.16883	-0.801485	1.97566	15.283	3.18242e-07	6.21519e-06
MOCS2	0.297147	-0.931229	-1.22838	2.92004	15.282	3.18558e-07	6.21864e-06
ERGIC1	1.16966	0.26097	-0.908691	4.12099	15.2478	3.29157e-07	6.40314e-06
LOC100507661	-0.975731	0.610642	1.58637	1.61685	15.2364	3.32776e-07	6.4651e-06
LOC105370884	-0.469821	-1.28425	-0.814428	1.49805	15.2278	3.3555e-07	6.5095e-06
FAM156B	-0.214567	-1.15101	-0.936442	2.73583	15.2247	3.36527e-07	6.52187e-06
LOC105374219	0.462995	1.14047	0.677479	2.54001	15.2234	3.36972e-07	6.52673e-06
SNRNP48	1.35146	0.498084	-0.853372	3.99658	15.206	3.42635e-07	6.62779e-06
FANK1	1.18313	1.08405	-0.0990829	2.78811	15.1988	3.44994e-07	6.67053e-06
SMC2	0.525702	-0.794426	-1.32013	2.7477	15.1812	3.50853e-07	6.76331e-06
LAPTM4A	-0.0661751	-1.0237	-0.957521	2.45325	15.1719	3.54013e-07	6.81834e-06
WNT2B	0.941635	1.07252	0.13089	1.56229	15.1631	3.57014e-07	6.87318e-06
LINC00520	1.10964	1.25276	0.143119	2.3106	15.1585	3.5859e-07	6.89757e-06
LOC101929426	-0.476765	0.659827	1.13659	3.28849	15.1423	3.64218e-07	7.00281e-06
LOC151121	0.461382	1.10909	0.647711	0.953979	15.1301	3.68487e-07	7.06967e-06
BCAS2	-0.558004	-1.06639	-0.508383	2.69997	15.1225	3.71178e-07	7.11822e-06
GLT8D1	-0.771825	-1.0907	-0.318873	3.25322	15.1162	3.73447e-07	7.15867e-06
LOC105371867	0.400319	-0.784079	-1.1844	1.10421	15.1026	3.78333e-07	7.24921e-06
LOC105376534	1.29266	-0.386303	-1.67896	4.01468	15.1009	3.78948e-07	7.25789e-06
LOC102724810	1.14096	1.25362	0.112651	2.18894	15.0962	3.80676e-07	7.28785e-06
FAM102A	0.405598	-0.699348	-1.10495	1.38503	15.0954	3.80969e-07	7.29034e-06
TRAV8-5	-0.332377	-1.06392	-0.731539	3.04167	15.0935	3.81641e-07	7.30007e-06
THUMPD1	-0.18739	-1.02972	-0.842327	3.12759	15.0886	3.8345e-07	7.33153e-06
SLC18B1	-0.696541	-1.01018	-0.313634	1.71566	15.0835	3.85313e-07	7.36084e-06
SIK1	1.26956	1.13102	-0.138542	1.33369	15.079	3.86974e-07	7.38942e-06
TMEM2	1.47803	0.221438	-1.25659	3.56577	15.0749	3.88518e-07	7.40939e-06
C8ORF34	-1.15275	0.266512	1.41926	2.85333	15.0718	3.89679e-07	7.42837e-06
LOC105378294	-1.17332	-1.06305	0.110272	2.90178	15.0642	3.92508e-07	7.46718e-06
RPL18A	-0.672383	-1.20517	-0.532791	1.96976	15.0624	3.93184e-07	7.47283e-06
C16ORF92	0.921235	1.18204	0.260807	2.25792	15.053	3.96763e-07	7.5361e-06
SNTG1	1.04661	0.0442372	-1.00237	1.39878	15.0528	3.9685e-07	7.5361e-06
HIST1H4C	-0.478627	-1.1378	-0.659168	2.29672	15.0418	4.01036e-07	7.60321e-06
DDIT3	0.66351	-0.676949	-1.34046	3.26954	15.0417	4.01065e-07	7.60321e-06
ABCA12	1.63425	0.841758	-0.792488	3.60865	15.0389	4.02181e-07	7.62113e-06
LINC01239	0.761162	1.1135	0.352342	3.34401	15.0273	4.06667e-07	7.69436e-06
C7ORF73	-0.253742	-1.1021	-0.848356	3.19048	15.0271	4.06735e-07	7.69436e-06
ARHGEF28	1.69158	0.334051	-1.35753	3.08622	15.0239	4.07986e-07	7.71148e-06
UNC45A	0.498978	-0.638267	-1.13725	4.14809	15.0201	4.09477e-07	7.73313e-06
EDF1	0.325908	-0.791422	-1.11733	3.3763	15.0149	4.11515e-07	7.76504e-06
LOC105376575	1.02031	0.827019	-0.193287	1.12092	15.013	4.12287e-07	7.77304e-06
ZNF330	-0.145826	-1.09186	-0.946032	3.22312	15.007	4.1465e-07	7.81342e-06
PAIP1	0.149187	-0.931886	-1.08107	2.5255	15.0067	4.14779e-07	7.81342e-06
RPL31P25	0.574372	-0.991638	-1.56601	2.0001	15.0023	4.16533e-07	7.83984e-06
BRSK2	1.19082	0.0490635	-1.14175	3.55116	14.9989	4.1791e-07	7.86244e-06
USP9YP10	-0.210333	0.866939	1.07727	1.77945	14.9969	4.18673e-07	7.87349e-06
LOC105378725	0.452381	-0.967457	-1.41984	1.35579	14.9798	4.25608e-07	8.00053e-06
VN1R91P	0.00292271	-1.14647	-1.1494	2.65462	14.9762	4.27087e-07	8.02159e-06
LRRC3-AS1	1.05383	0.902791	-0.151042	0.653214	14.9753	4.27448e-07	8.02499e-06
INHBA	0.608	1.18874	0.580737	1.36688	14.974	4.27984e-07	8.02821e-06
SULT1A3	0.696256	1.16716	0.470899	3.1508	14.9736	4.28159e-07	8.02821e-06
LOC105370018	-1.62621	-0.835878	0.790332	3.84052	14.9703	4.29509e-07	8.04676e-06
LOC102723809	1.014	1.02771	0.0137129	3.2865	14.9675	4.30676e-07	8.06186e-06
MMP15	0.28784	-1.00398	-1.29182	2.91448	14.9605	4.3357e-07	8.10923e-06
TTC12	0.549869	-0.838039	-1.38791	3.59501	14.9572	4.34937e-07	8.13139e-06
FAM149A	0.210056	-0.936576	-1.14663	1.94778	14.9492	4.38284e-07	8.18369e-06
SNORA70	-0.352192	-1.09023	-0.738039	1.3607	14.9442	4.40382e-07	8.21942e-06
COL4A1	-0.800571	-1.18359	-0.383017	2.70387	14.9424	4.41141e-07	8.23015e-06
VAV3-AS1	0.435541	-0.85593	-1.29147	3.45964	14.9329	4.45212e-07	8.30262e-06
NNAT	-0.215582	-1.19902	-0.983441	3.17876	14.9161	4.52436e-07	8.4303e-06
TAF9	-0.990512	-1.18456	-0.19405	2.84312	14.9111	4.54629e-07	8.46065e-06
C14ORF166	-0.114703	-1.01867	-0.903969	2.01503	14.91	4.55088e-07	8.46559e-06
SLBP	0.901435	-0.628813	-1.53025	2.84007	14.9039	4.57776e-07	8.51205e-06
RNF165	0.0895156	-0.974725	-1.06424	2.7424	14.8924	4.62852e-07	8.59927e-06
LRTM2	-0.805228	-1.06641	-0.261177	3.41843	14.8882	4.64696e-07	8.62993e-06
LOC105369266	1.27838	1.01322	-0.265165	1.01885	14.8813	4.67812e-07	8.68059e-06
DYNLT1	-0.593274	-1.10462	-0.51135	3.11852	14.8746	4.70792e-07	8.72861e-06
LOC105374951	0.0378522	1.01369	0.975836	2.74487	14.866	4.74704e-07	8.7902e-06
ITIH2	0.540054	1.07459	0.53454	1.57475	14.838	4.87632e-07	9.00344e-06
C1ORF56	0.400005	1.10252	0.702513	2.04354	14.8272	4.92741e-07	9.0865e-06
LOC102724784	-0.633914	-1.0058	-0.371882	1.61375	14.8262	4.93186e-07	9.08873e-06
LOC101928180	0.946131	1.00952	0.0633917	1.11881	14.8004	5.05558e-07	9.30644e-06
NPIPB15	0.683659	-0.771882	-1.45554	2.93705	14.8001	5.0571e-07	9.30644e-06
LOC105374494	1.16258	1.01029	-0.152292	3.39851	14.7995	5.05971e-07	9.3074e-06
RPL14	-0.245003	-1.01122	-0.766218	2.87555	14.7673	5.21895e-07	9.57665e-06
LOC101929719	-0.117957	-1.06476	-0.946807	1.0643	14.762	5.24513e-07	9.62075e-06
TNFRSF12A	0.640767	-1.03317	-1.67394	2.35242	14.7612	5.24921e-07	9.62085e-06
PSMA5	-0.421646	-1.00282	-0.581178	3.49008	14.7612	5.2495e-07	9.62085e-06
LOC101927947	1.30106	0.846596	-0.454466	1.90788	14.7542	5.28488e-07	9.67377e-06
ESRRA	0.509334	-0.778001	-1.28733	3.65213	14.7535	5.28848e-07	9.6764e-06
AGAP3	1.0273	0.406575	-0.620728	4.19516	14.7506	5.30323e-07	9.69545e-06
ZNF268	-0.0174308	-1.02595	-1.00852	1.48018	14.7336	5.39044e-07	9.84681e-06
CCDC158	-0.0665628	-1.02935	-0.962786	3.73279	14.728	5.41913e-07	9.89518e-06
TXK	0.792874	-0.684551	-1.47742	4.07829	14.7246	5.43702e-07	9.91568e-06
IFIT5	-0.103653	-1.14146	-1.03781	2.41493	14.7059	5.5356e-07	1.00667e-05
KCNK9	-0.769717	-1.23814	-0.468426	2.72448	14.7013	5.55979e-07	1.00983e-05
FABP3	0.123377	-0.90282	-1.0262	3.85356	14.699	5.57236e-07	1.01168e-05
M1AP	-0.266795	-1.24118	-0.97439	2.679	14.6986	5.57451e-07	1.01168e-05
LOC102723552	-0.902484	0.239027	1.14151	3.70308	14.6875	5.63408e-07	1.02208e-05
NR1D1	-0.344823	-1.04627	-0.701443	1.48647	14.6867	5.63854e-07	1.02247e-05
C1ORF95	0.578441	-0.668344	-1.24678	3.80867	14.6714	5.72201e-07	1.03719e-05
LOC105377212	0.412595	-0.93304	-1.34564	2.60267	14.6513	5.8336e-07	1.05527e-05
LOC105374056	-1.00089	0.303652	1.30454	2.47403	14.6505	5.83799e-07	1.05564e-05
LOC105372215	0.181417	-1.01134	-1.19275	1.68042	14.6432	5.87896e-07	1.06219e-05
ISM1	-0.203295	-1.10515	-0.901856	3.84175	14.6293	5.95766e-07	1.07553e-05
SS18L2	-0.277464	-1.08827	-0.810809	3.00683	14.6224	5.9977e-07	1.08189e-05
EPHB6	0.0820077	-0.975396	-1.0574	3.46348	14.6206	6.00778e-07	1.08327e-05
ZFAND1	-0.606563	-1.04516	-0.438601	3.39502	14.6182	6.02158e-07	1.08488e-05
LOC101927815	1.04236	0.715769	-0.326589	1.56609	14.6035	6.10718e-07	1.09941e-05
RBM18	0.541785	-0.82889	-1.37068	2.14806	14.5961	6.15061e-07	1.10679e-05
LOC105372481	-0.393063	-1.08444	-0.69138	3.07336	14.5896	6.18938e-07	1.11287e-05
LOC105374305	0.958149	1.06154	0.103395	1.05313	14.5779	6.25935e-07	1.12499e-05
KLHDC4	1.55733	0.406041	-1.15129	3.06439	14.5623	6.35376e-07	1.14104e-05
KCNQ2	1.08249	0.353002	-0.729485	4.15859	14.5554	6.39596e-07	1.1477e-05
PDE6C	1.40982	0.963905	-0.445918	1.73756	14.5478	6.44314e-07	1.15477e-05
DGKE	0.925667	-0.0827357	-1.0084	4.29495	14.5362	6.51512e-07	1.1658e-05
TRIM7	-0.429225	-1.14142	-0.712199	3.53294	14.5161	6.64172e-07	1.18655e-05
LOC105379124	-0.371632	-1.03834	-0.666713	1.07927	14.4992	6.75057e-07	1.20407e-05
COL19A1	1.11364	-0.376056	-1.48969	3.06755	14.4816	6.86595e-07	1.22318e-05
PEBP4	-0.788778	-1.14082	-0.352045	2.25851	14.4797	6.87825e-07	1.22489e-05
ENHO	-0.585891	-1.2271	-0.641213	2.14563	14.4687	6.95154e-07	1.23745e-05
STIP1	1.1747	-0.323087	-1.49778	2.91849	14.466	6.9692e-07	1.2396e-05
LOC729033	-0.440669	-1.13586	-0.695189	1.24246	14.4574	7.027e-07	1.24889e-05
GPR132	0.294589	1.10265	0.808062	2.60981	14.4526	7.05996e-07	1.25425e-05
LOC768086	0.237339	-0.967551	-1.20489	2.94068	14.4511	7.06992e-07	1.25552e-05
LOC105378519	-0.359401	-1.17751	-0.818111	1.72374	14.4451	7.11082e-07	1.26228e-05
PHF1	1.00518	0.828566	-0.176612	3.60387	14.444	7.11843e-07	1.26313e-05
C11ORF97	1.21575	1.25138	0.0356355	2.00295	14.4211	7.27671e-07	1.28865e-05
PEX16	-0.589065	-1.1663	-0.577233	1.92487	14.4113	7.34537e-07	1.30029e-05
MFSD12	1.39979	0.6892	-0.71059	2.43914	14.4084	7.36571e-07	1.30338e-05
TUBG1	0.236614	-1.01858	-1.25519	3.20697	14.3897	7.4995e-07	1.32548e-05
GPR143	-0.52569	-1.01213	-0.486443	0.894769	14.3882	7.51036e-07	1.32687e-05
NTMT1	-0.509562	-1.2005	-0.690934	1.74817	14.3701	7.64215e-07	1.34855e-05
KCNF1	0.65136	-0.921823	-1.57318	1.93478	14.3485	7.80248e-07	1.37305e-05
APC2	1.07114	0.732193	-0.338945	3.37887	14.3184	8.03083e-07	1.41101e-05
USP35	0.866948	1.08458	0.21763	2.85672	14.3113	8.08583e-07	1.41909e-05
SYT3	0.351138	-0.788746	-1.13988	3.51948	14.3113	8.08639e-07	1.41909e-05
ANKRD9	0.519434	-0.689397	-1.20883	4.08504	14.3107	8.09088e-07	1.41932e-05
SH3BP5	0.681534	-0.44017	-1.1217	3.80947	14.3087	8.10677e-07	1.42099e-05
ERV3-1	0.44809	-0.823194	-1.27128	2.50417	14.302	8.15892e-07	1.42845e-05
LOC101928962	1.05876	1.08882	0.0300623	2.16624	14.2993	8.18e-07	1.43102e-05
VEPH1	1.5169	1.01321	-0.503694	2.35813	14.2943	8.21959e-07	1.4364e-05
LCNL1	1.28006	-0.238237	-1.5183	3.30346	14.2942	8.2204e-07	1.4364e-05
TPT1P5	-0.568949	0.652239	1.22119	2.98058	14.2639	8.46322e-07	1.47626e-05
LOC100996573	-0.395036	0.63212	1.02716	3.39918	14.2585	8.50684e-07	1.48297e-05
GSTP1	0.0292827	-0.986649	-1.01593	3.05332	14.257	8.51895e-07	1.4845e-05
UROD	0.126319	-1.00282	-1.12914	2.79825	14.2462	8.60856e-07	1.49894e-05
RTCA-AS1	-0.0469143	-1.01435	-0.967436	1.23848	14.2194	8.83287e-07	1.53262e-05
SEZ6	0.693224	-0.559413	-1.25264	2.04158	14.2095	8.91711e-07	1.54664e-05
MTAP	0.612756	-0.498135	-1.11089	3.45782	14.2007	8.99308e-07	1.55921e-05
LOC105370926	1.33601	1.05462	-0.281392	2.02994	14.1937	9.0538e-07	1.56913e-05
ACVR2B	-0.950515	0.435469	1.38598	2.31135	14.1869	9.11325e-07	1.57882e-05
TRDMT1	1.09362	-0.209762	-1.30338	4.0269	14.1633	9.3222e-07	1.61251e-05
LOC728688	0.627187	1.12652	0.499337	1.06898	14.1608	9.34471e-07	1.61516e-05
LOC105377545	-1.33447	-0.40606	0.928409	0.689608	14.1559	9.3885e-07	1.61959e-05
LOC344382	-0.311074	-1.19626	-0.885189	2.10858	14.1434	9.50192e-07	1.63662e-05
LTV1	-0.420197	-1.10592	-0.685725	2.89658	14.1402	9.53139e-07	1.64107e-05
MYL12A	0.221167	-0.962344	-1.18351	1.52197	14.1165	9.7516e-07	1.67575e-05
PI4KAP1	1.43385	0.422251	-1.0116	3.43673	14.1134	9.78059e-07	1.67879e-05
DGKG	1.22007	0.438766	-0.781303	1.95203	14.106	9.85015e-07	1.68879e-05
POLB	-0.559761	-1.06882	-0.509064	2.61531	14.1	9.90689e-07	1.69656e-05
ALG8	0.379369	-0.826927	-1.2063	2.92487	14.0995	9.91227e-07	1.69683e-05
MED8	-0.0843566	-1.11439	-1.03003	2.52486	14.0946	9.95888e-07	1.7035e-05
LOC105372295	0.320136	-0.831296	-1.15143	0.802239	14.0889	1.00139e-06	1.71226e-05
MEG8	1.04902	0.236627	-0.812397	4.76731	14.0611	1.02843e-06	1.75446e-05
KCNK13	-0.308072	-1.04636	-0.738288	3.79342	14.0535	1.036e-06	1.76602e-05
LOC105376724	1.39094	1.09516	-0.295784	2.0964	14.0393	1.05028e-06	1.78832e-05
LOC105372062	-1.27188	-0.896923	0.374953	3.43325	14.038	1.05156e-06	1.78982e-05
MIR210HG	0.372831	1.10204	0.729211	3.05373	14.0215	1.06843e-06	1.81714e-05
LOC642862	-1.40728	-1.14085	0.266431	2.26494	14.0161	1.07391e-06	1.82508e-05
PIGZ	1.05084	-0.357929	-1.40876	3.84408	14.0004	1.09031e-06	1.85012e-05
STARD4-AS1	-0.193664	-1.02857	-0.834911	3.5437	13.9859	1.10559e-06	1.87392e-05
LOC105375894	-1.0169	-0.963083	0.0538195	0.878897	13.9653	1.1277e-06	1.90849e-05
DGCR6	0.040914	-1.06198	-1.1029	3.20324	13.9623	1.13099e-06	1.91334e-05
SERPINA10	-0.266332	0.871453	1.13779	1.43884	13.9614	1.13194e-06	1.91422e-05
CHRNB2	0.780198	-0.698105	-1.4783	3.38435	13.9473	1.14745e-06	1.93824e-05
EMC7	-0.237106	-1.01942	-0.782318	2.44979	13.9459	1.14892e-06	1.93999e-05
PPFIBP2	1.30847	0.246001	-1.06247	1.57575	13.9369	1.15899e-06	1.95626e-05
YIPF4	0.0401452	-0.968913	-1.00906	2.92951	13.9324	1.16401e-06	1.96177e-05
SRSF9	-0.363496	-1.0506	-0.687103	3.0362	13.9219	1.17582e-06	1.98018e-05
LOC105372585	0.050987	-1.02704	-1.07803	1.70923	13.9166	1.18176e-06	1.98868e-05
PQBP1	-0.832867	-1.1447	-0.311832	2.46658	13.9156	1.183e-06	1.99001e-05
ZNF718	0.786924	-0.357548	-1.14447	3.77276	13.9107	1.18852e-06	1.99779e-05
POLR2A	1.15985	-0.0724885	-1.23234	3.4818	13.8995	1.20142e-06	2.01663e-05
SLCO1B7	-0.805465	0.608958	1.41442	1.23028	13.8994	1.20153e-06	2.01663e-05
PCAT14	-0.445011	-1.09808	-0.653072	3.03381	13.8913	1.21095e-06	2.03015e-05
LOC105376764	0.170518	-0.900141	-1.07066	3.65335	13.8884	1.21434e-06	2.03507e-05
LOC102724586	-0.849064	-1.24899	-0.399925	2.3049	13.874	1.2312e-06	2.05869e-05
SPAG5	1.22748	1.13	-0.0974861	2.93801	13.8707	1.2352e-06	2.06459e-05
EPPK1	0.0558123	-0.993556	-1.04937	1.09797	13.8546	1.25451e-06	2.09243e-05
LOC105374836	-0.101696	-1.10673	-1.00503	3.42791	13.8315	1.28266e-06	2.13434e-05
MAPK11	0.998786	1.11294	0.114154	1.89476	13.8183	1.29903e-06	2.15757e-05
UBE2T	-0.0907098	-1.10532	-1.01461	1.69999	13.8114	1.30775e-06	2.16962e-05
EPS8L2	0.0957769	-1.13661	-1.23238	2.47702	13.8034	1.31785e-06	2.18556e-05
LOC105376784	0.0341304	-1.07474	-1.10887	2.12153	13.791	1.33356e-06	2.20833e-05
BEST4	0.367436	-1.03136	-1.3988	2.03939	13.7838	1.34292e-06	2.2222e-05
SEC61B	-0.514566	-1.06315	-0.548589	2.38522	13.7658	1.3663e-06	2.25669e-05
LOC105374869	1.31481	1.03249	-0.28232	1.73156	13.7613	1.37228e-06	2.26574e-05
RNF212B	1.63813	0.165406	-1.47273	2.79948	13.7387	1.40251e-06	2.31137e-05
ORC1	-0.146066	0.946539	1.09261	1.7561	13.713	1.43762e-06	2.36312e-05
ABCF3	0.614054	-0.740799	-1.35485	3.49755	13.705	1.44869e-06	2.3787e-05
TMEM44-AS1	-0.165588	-1.0288	-0.863215	1.87476	13.7025	1.4522e-06	2.38271e-05
LINC01565	-0.258028	0.908275	1.1663	2.05503	13.6972	1.45962e-06	2.39224e-05
LOC439994	-0.19554	-1.08461	-0.889066	1.96981	13.6949	1.46284e-06	2.39664e-05
CCS	0.12686	-0.937591	-1.06445	3.20134	13.694	1.46417e-06	2.39794e-05
STK33P1	-0.752964	0.492221	1.24518	3.16057	13.6812	1.48227e-06	2.42314e-05
LOC286177	-0.513197	0.843352	1.35655	1.94268	13.6782	1.48654e-06	2.42922e-05
LOC101929609	-0.100029	-1.08729	-0.987264	1.65328	13.6776	1.48735e-06	2.42967e-05
LOC105371780	0.25867	-1.00196	-1.26063	1.40718	13.6698	1.49867e-06	2.44726e-05
LOC105370017	-1.41074	-0.7351	0.67564	4.26068	13.6604	1.51226e-06	2.46404e-05
LOC105375169	1.5328	0.159408	-1.37339	3.23008	13.648	1.53046e-06	2.49188e-05
CC2D1A	1.12429	0.309585	-0.814705	4.00601	13.6411	1.54059e-06	2.50655e-05
RPS26P51	-0.944028	-1.18522	-0.241195	1.29891	13.6297	1.55753e-06	2.53008e-05
FOSL2	1.03801	1.04445	0.00643687	1.29216	13.6202	1.57184e-06	2.55013e-05
FAM213B	1.64372	0.396599	-1.24712	2.1094	13.6153	1.57939e-06	2.56127e-05
LOC105372471	0.305192	-0.881254	-1.18645	1.35108	13.5952	1.61025e-06	2.60469e-05
PROSER1	0.548947	-0.803833	-1.35278	2.63746	13.5943	1.6116e-06	2.60593e-05
LOC105376918	-0.337238	0.78871	1.12595	1.15648	13.5937	1.61257e-06	2.60655e-05
UCK2	0.349342	-0.677157	-1.0265	3.94103	13.5914	1.61607e-06	2.61033e-05
LOC105378063	-0.225803	-1.15789	-0.932091	2.01423	13.5889	1.61993e-06	2.61467e-05
LOC105370946	1.37661	1.06329	-0.313325	2.36907	13.5841	1.62744e-06	2.62585e-05
SERBP1P1	-0.261221	0.742062	1.00328	3.07148	13.5834	1.62863e-06	2.62681e-05
LOC100289333	-0.078556	-1.05203	-0.973477	2.99378	13.5813	1.63193e-06	2.63118e-05
SSR2	-0.467764	-1.09185	-0.624087	2.47727	13.5565	1.67135e-06	2.68795e-05
SLC35F4	-1.01383	0.247621	1.26145	1.70839	13.527	1.71947e-06	2.76136e-05
LYSMD4	-0.175683	-1.06332	-0.88764	2.84624	13.5256	1.72178e-06	2.76407e-05
SLC9A3R2	0.288281	-0.964296	-1.25258	2.0999	13.5238	1.72474e-06	2.76683e-05
POMT2	0.859217	-0.569315	-1.42853	2.43582	13.5136	1.74179e-06	2.79117e-05
SLC27A4	1.08646	0.0263541	-1.06011	4.27901	13.5127	1.74336e-06	2.7927e-05
LOC642381	-0.412926	0.938992	1.35192	2.51846	13.5111	1.74594e-06	2.79582e-05
LOC728095	-1.22729	-1.18104	0.0462487	2.38698	13.5102	1.74747e-06	2.79727e-05
LOC102724470	0.0884909	-1.02788	-1.11637	1.14342	13.4993	1.76593e-06	2.82379e-05
LOC105372493	-1.06155	-1.05653	0.00501744	1.96124	13.4966	1.77057e-06	2.83019e-05
ZNF354B	1.06872	-0.475888	-1.54461	2.83736	13.4797	1.79955e-06	2.87137e-05
IFI27L1	0.434576	-0.903005	-1.33758	2.71166	13.4791	1.80062e-06	2.87205e-05
CLIC5	1.16486	0.896707	-0.268156	1.17834	13.4746	1.8085e-06	2.88153e-05
PARM1	0.728437	-0.380956	-1.10939	4.31681	13.4656	1.82432e-06	2.90157e-05
MIR612	0.0705151	-1.14654	-1.21705	1.57985	13.4542	1.84439e-06	2.93139e-05
RPS19BP1	-0.241779	-1.03634	-0.794557	2.04294	13.4528	1.84691e-06	2.93435e-05
LOC643630	-0.351684	-1.20387	-0.852186	1.73413	13.4284	1.89081e-06	2.99569e-05
EIF2AK1	0.318738	-0.775517	-1.09426	3.44922	13.4092	1.92605e-06	3.04469e-05
POLE	-0.240402	0.874877	1.11528	2.14526	13.3952	1.95221e-06	3.0819e-05
LOC101927575	-0.40025	0.681639	1.08189	3.11465	13.3673	2.00549e-06	3.16043e-05
RABGGTA	0.603703	-0.782086	-1.38579	3.27893	13.3431	2.05277e-06	3.23152e-05
PRO1804	1.22254	0.523514	-0.699027	4.2503	13.3395	2.05995e-06	3.24053e-05
IL2RA	-0.319117	0.800941	1.12006	2.19372	13.3318	2.07526e-06	3.26117e-05
LOC728433	-1.00323	-0.530954	0.472277	0.583427	13.2948	2.15051e-06	3.36994e-05
SLC7A8	1.06455	0.473807	-0.59074	4.05008	13.2928	2.1547e-06	3.37532e-05
LDHAP4	-0.566169	-1.02093	-0.454759	1.65324	13.2725	2.19725e-06	3.43594e-05
GNL2	-0.565913	-1.12214	-0.556222	2.04954	13.2639	2.21551e-06	3.46207e-05
LOC100421022	0.34912	-0.900405	-1.24952	1.19209	13.2462	2.25366e-06	3.51431e-05
LOC105376160	1.531	0.66047	-0.870531	2.90598	13.2321	2.28453e-06	3.55996e-05
THAP7	0.431223	-0.899331	-1.33055	1.61536	13.2217	2.30752e-06	3.59327e-05
IL20RA	-1.37188	-1.10435	0.267522	1.60488	13.2192	2.31303e-06	3.6006e-05
LOC105376351	1.75126	0.577416	-1.17384	1.56604	13.204	2.34727e-06	3.64882e-05
TTC24	-1.09805	0.378585	1.47663	1.3817	13.2007	2.35474e-06	3.65914e-05
WIPF3	1.34414	0.581266	-0.762873	3.68015	13.1975	2.36184e-06	3.66762e-05
DPP10-AS1	-0.656113	-1.0851	-0.428984	2.99074	13.1667	2.43301e-06	3.75984e-05
COPG2IT1	0.343685	-0.657385	-1.00107	4.09647	13.1644	2.43841e-06	3.76688e-05
CYP2A7	0.7505	1.06079	0.31029	1.37431	13.1529	2.46557e-06	3.80489e-05
KRT86	0.465653	-0.833189	-1.29884	1.863	13.1352	2.50812e-06	3.86521e-05
LOC100130357	0.546576	-0.783439	-1.33002	2.92007	13.1304	2.51984e-06	3.88193e-05
ZNF711	-0.743368	-1.09039	-0.34702	2.63331	13.1181	2.54989e-06	3.92551e-05
ASB13	0.596208	-0.665928	-1.26214	3.71845	13.1094	2.57115e-06	3.95551e-05
HMGN2P14	-0.522822	0.819685	1.34251	1.89333	13.0846	2.63339e-06	4.04291e-05
ARHGAP9	-0.466737	-1.17881	-0.712074	2.17514	13.0735	2.66188e-06	4.08243e-05
CACNG5	-1.11616	-0.896961	0.219203	4.15228	13.0692	2.67279e-06	4.09636e-05
BEGAIN	1.19203	0.289815	-0.902211	4.42439	13.0589	2.69969e-06	4.1319e-05
LOC105373449	0.847274	-0.740655	-1.58793	2.55388	13.0535	2.71374e-06	4.14914e-05
ESYT1	0.56781	-0.577463	-1.14527	4.12331	13.0389	2.75217e-06	4.20315e-05
LOC105375339	0.672538	1.05284	0.380299	2.28995	13.0322	2.77e-06	4.22648e-05
HMGN1P36	1.44813	-0.16302	-1.61115	2.01508	13.0227	2.79547e-06	4.26208e-05
TNNT1	-0.593286	-1.27755	-0.684263	2.91869	13.0183	2.80742e-06	4.27773e-05
LOC105374991	1.0787	-0.549938	-1.62864	1.57213	13.0175	2.80955e-06	4.27951e-05
FBLL1	1.14622	1.01096	-0.135263	2.79561	13.01	2.82984e-06	4.30161e-05
TMEM60	-0.488402	-1.13936	-0.650955	2.5048	13.0058	2.84126e-06	4.31749e-05
SCRT1	1.07872	0.633984	-0.444733	3.70143	12.9952	2.87068e-06	4.35185e-05
LOC105379437	0.418287	1.09257	0.67428	1.80848	12.9931	2.87628e-06	4.35885e-05
VIM-AS1	1.76093	0.250236	-1.5107	1.82798	12.9927	2.87757e-06	4.35932e-05
SDHAF3	0.209881	-0.982009	-1.19189	2.31644	12.9905	2.88368e-06	4.36709e-05
CADM2-AS2	0.950224	-0.272455	-1.22268	3.95374	12.9816	2.90842e-06	4.40158e-05
C6ORF165	1.62335	0.350869	-1.27248	3.2181	12.9726	2.93391e-06	4.43563e-05
LOC105374861	-0.870518	0.350759	1.22128	0.732676	12.9702	2.94073e-06	4.44444e-05
ADAMTS7P1	-1.39075	-1.0172	0.37355	2.21676	12.9595	2.97122e-06	4.48749e-05
TAZ	1.06765	-0.215684	-1.28333	3.2696	12.9318	3.05173e-06	4.60286e-05
LOC101928978	-0.738498	0.44775	1.18625	1.8433	12.9281	3.0625e-06	4.61753e-05
ARID3A	0.899414	1.05077	0.151351	1.87661	12.9213	3.08252e-06	4.64615e-05
LOC101928580	-0.540842	0.683439	1.22428	2.82167	12.9201	3.08637e-06	4.65038e-05
FLJ43315	-1.39542	-0.382514	1.01291	2.79611	12.9169	3.09577e-06	4.66297e-05
POLR1D	0.566115	-0.667699	-1.23381	3.29775	12.9165	3.09704e-06	4.66331e-05
RANGAP1	1.11146	0.518609	-0.592848	3.73028	12.915	3.10139e-06	4.6683e-05
PRPF8	0.417481	-0.602963	-1.02044	3.58641	12.9123	3.10959e-06	4.67905e-05
SNORD114-20	-0.193741	-1.24827	-1.05453	2.47089	12.9075	3.124e-06	4.69599e-05
MMEL1	-0.410304	0.658934	1.06924	2.18086	12.9041	3.13411e-06	4.7096e-05
NUP85	-0.731071	-1.0263	-0.295227	2.55436	12.9031	3.13721e-06	4.71268e-05
AFG3L1P	-0.745035	-1.06848	-0.323447	2.80344	12.8963	3.15775e-06	4.74034e-05
LYG1	1.1742	0.928559	-0.245645	1.55908	12.8937	3.16586e-06	4.75092e-05
SPDYE19P	-0.540993	0.658025	1.19902	3.09068	12.8835	3.19727e-06	4.79322e-05
LOC284912	-0.829117	0.504523	1.33364	2.44504	12.8811	3.20454e-06	4.8009e-05
LOC105373721	-0.281367	-1.00928	-0.727915	3.32693	12.8668	3.24906e-06	4.85943e-05
VANGL1	-0.160181	-1.04883	-0.88865	3.34565	12.8656	3.25288e-06	4.86353e-05
RPS7	-0.839409	-1.02926	-0.189853	2.82044	12.8635	3.25953e-06	4.87184e-05
RPARP-AS1	1.23522	0.857244	-0.377981	2.30661	12.8578	3.27742e-06	4.89694e-05
TAF7	0.251466	-0.866604	-1.11807	3.17634	12.8565	3.28161e-06	4.90105e-05
SPAG7	-0.316044	-1.04709	-0.731047	2.98415	12.8562	3.28237e-06	4.90105e-05
HMCN2	-0.536863	-1.15446	-0.617592	3.03046	12.8529	3.29306e-06	4.91537e-05
LOC283299	1.14255	0.180098	-0.962452	4.58099	12.8429	3.32496e-06	4.95901e-05
LOC100533845	-0.859437	-1.15747	-0.298035	3.04457	12.8424	3.32653e-06	4.95901e-05
LGI3	0.868236	-0.235731	-1.10397	4.01047	12.8233	3.3884e-06	5.04251e-05
LOC101927325	1.44189	0.596031	-0.84586	3.71846	12.8172	3.40821e-06	5.06692e-05
GUSBP4	0.373292	-0.761115	-1.13441	3.27503	12.8141	3.41851e-06	5.08053e-05
TRNP	1.29785	0.470369	-0.827484	1.96414	12.8119	3.42594e-06	5.08989e-05
LOC102546226	-0.121547	0.942982	1.06453	2.11961	12.8042	3.45131e-06	5.12076e-05
LOC171391	0.855941	1.06366	0.207717	2.11586	12.8009	3.46249e-06	5.13394e-05
AJUBA	-0.35807	0.879448	1.23752	1.70009	12.8002	3.46468e-06	5.13547e-05
RNF31	0.200631	-0.934851	-1.13548	2.92429	12.7995	3.46697e-06	5.13547e-05
BRICD5	1.04144	0.903151	-0.138287	3.07783	12.7798	3.53341e-06	5.22348e-05
RPL37	-0.375564	-1.00103	-0.625461	2.20707	12.7572	3.61132e-06	5.3228e-05
LOC643605	-0.49239	0.649374	1.14176	3.0068	12.755	3.61921e-06	5.33266e-05
MGAT4EP	-0.223713	0.784201	1.00791	2.92737	12.7515	3.63124e-06	5.34862e-05
MYDGF	0.0865866	-0.915123	-1.00171	1.6934	12.7463	3.64969e-06	5.37225e-05
ST8SIA5	0.870897	-0.326595	-1.19749	3.75757	12.7426	3.66273e-06	5.38611e-05
ARHGAP18	-0.198803	-1.02645	-0.827646	2.6696	12.7291	3.71072e-06	5.44772e-05
SEPHS1	0.507557	-0.765466	-1.27302	2.21601	12.7073	3.7895e-06	5.55242e-05
AQP7P1	-0.835178	-1.04407	-0.208893	1.33979	12.7056	3.79585e-06	5.55857e-05
TMIGD2	-0.755204	0.617121	1.37233	2.62189	12.7055	3.79619e-06	5.55857e-05
LOC102724030	-0.529872	0.566744	1.09662	3.1096	12.6925	3.8442e-06	5.6215e-05
LOC105373822	-0.160555	-1.13575	-0.975193	2.894	12.6893	3.856e-06	5.63691e-05
LOC101929574	1.55686	0.778259	-0.778602	1.82	12.686	3.86847e-06	5.65144e-05
LOC105369537	-0.117632	-1.16708	-1.04944	1.97512	12.6834	3.87802e-06	5.66353e-05
DNAJC5	0.954359	-0.0634882	-1.01785	4.0078	12.6819	3.88387e-06	5.66836e-05
LOC105375971	-0.892256	0.255513	1.14777	0.821042	12.6674	3.93833e-06	5.74222e-05
C18ORF42	0.5804	-0.597578	-1.17798	4.22696	12.6634	3.95367e-06	5.7627e-05
CT62	1.47248	0.986345	-0.486139	2.95949	12.6536	3.99113e-06	5.80972e-05
EID2	-0.11476	-1.04868	-0.93392	2.55429	12.6518	3.99813e-06	5.81801e-05
TMC8	-0.660236	0.395913	1.05615	2.06792	12.6506	4.00267e-06	5.82272e-05
FER1L4	1.20061	0.570141	-0.63047	4.15593	12.6225	4.11289e-06	5.97139e-05
LOC101060048	0.237918	-1.09403	-1.33195	1.82205	12.6135	4.14879e-06	6.01567e-05
FAM162B	0.766656	-0.772065	-1.53872	2.53772	12.5895	4.24598e-06	6.14861e-05
TMEM150B	-0.236868	0.868162	1.10503	1.7289	12.5876	4.25381e-06	6.15795e-05
C17ORF97	0.738979	-0.741126	-1.48011	1.98537	12.5785	4.29138e-06	6.2043e-05
FBXO8	-0.101457	-1.07885	-0.977392	2.72435	12.5765	4.29977e-06	6.2124e-05
DHDH	-0.902447	0.202339	1.10479	0.915675	12.5752	4.3051e-06	6.21492e-05
LOC100420358	1.41337	1.02458	-0.38879	1.76036	12.5715	4.32055e-06	6.23435e-05
AGAP7P	-0.719869	0.66521	1.38508	2.36559	12.5686	4.33239e-06	6.24942e-05
FAM153B	1.33182	-0.0596182	-1.39144	3.3385	12.5645	4.34965e-06	6.26825e-05
NPAP1P5	-0.352477	0.854601	1.20708	1.60586	12.5485	4.41741e-06	6.35564e-05
LOC101928848	-0.593926	0.520681	1.11461	3.30066	12.5479	4.42008e-06	6.35619e-05
LGI2	0.286401	-0.879696	-1.1661	1.98014	12.5478	4.42064e-06	6.35619e-05
CRH	1.45134	0.310134	-1.1412	2.9064	12.5369	4.4671e-06	6.41678e-05
NOC3L	-0.493932	-1.01671	-0.522779	2.33512	12.5299	4.4975e-06	6.45378e-05
GRK5	1.29362	-0.00408061	-1.2977	3.10092	12.5155	4.5603e-06	6.52965e-05
RBP5	0.17652	-0.975832	-1.15235	1.30029	12.5137	4.56853e-06	6.53724e-05
GPR61	-0.178879	-1.11374	-0.934858	2.40138	12.5107	4.58179e-06	6.55303e-05
SNAI3-AS1	1.40673	0.747621	-0.659113	2.72492	12.5037	4.61299e-06	6.59452e-05
TDRD10	-0.75556	0.352999	1.10856	1.22801	12.5003	4.62784e-06	6.61363e-05
LOC105377865	1.48896	0.046672	-1.44229	3.04258	12.4988	4.63472e-06	6.62135e-05
CPSF3L	1.16728	0.368038	-0.799242	3.6998	12.4942	4.65542e-06	6.64878e-05
FKBP1B	0.228683	-0.975529	-1.20421	3.07818	12.4811	4.71442e-06	6.7223e-05
IGF2BP2-AS1	-0.3385	0.856334	1.19483	2.45626	12.4776	4.73075e-06	6.74344e-05
FBXO41	0.693698	-0.637083	-1.33078	3.18322	12.4659	4.78434e-06	6.81329e-05
SCNN1G	-0.511223	0.628827	1.14005	1.0976	12.4618	4.80317e-06	6.8314e-05
SUGT1P1	0.0514367	-0.963282	-1.01472	1.76528	12.4565	4.82793e-06	6.86006e-05
C6ORF1	0.525508	-0.705999	-1.23151	3.36528	12.4372	4.9188e-06	6.96479e-05
LOC105370948	1.22032	1.07133	-0.148993	2.19813	12.4365	4.92222e-06	6.96743e-05
TMEM160	-0.237683	-1.02087	-0.783183	3.10281	12.4316	4.9452e-06	6.99551e-05
MTRNR2L8	1.0267	0.845936	-0.180769	1.03157	12.4288	4.95883e-06	7.01035e-05
NADK	0.796143	-0.636819	-1.43296	1.8968	12.4265	4.97004e-06	7.02397e-05
FZD8	0.88479	1.13897	0.254177	2.11439	12.4166	5.01761e-06	7.08672e-05
SIVA1	0.0769767	-0.928561	-1.00554	1.51426	12.4113	5.04337e-06	7.11635e-05
SAP30L	0.288178	-0.965937	-1.25411	2.68072	12.408	5.05942e-06	7.13674e-05
GALT	0.628989	-0.43809	-1.06708	4.34528	12.4063	5.06758e-06	7.14326e-05
LOC105372603	-0.496763	-1.06329	-0.566524	2.05906	12.3974	5.11169e-06	7.20137e-05
TUBBP5	1.04914	1.04636	-0.00278335	1.86933	12.3922	5.13739e-06	7.2317e-05
RPL35P6	0.289603	-0.954709	-1.24431	1.33872	12.3874	5.16137e-06	7.25762e-05
SDCBP2	0.936148	-0.52967	-1.46582	1.7847	12.3797	5.19963e-06	7.30452e-05
DPCD	-0.192011	-1.13285	-0.940842	2.29637	12.3753	5.22195e-06	7.33126e-05
LOC105378269	-0.405132	0.66119	1.06632	1.1747	12.3724	5.23671e-06	7.34736e-05
SUPT4H1	0.29945	-0.904107	-1.20356	1.93319	12.3624	5.28732e-06	7.41604e-05
HAGHL	1.25105	0.548285	-0.702765	3.55904	12.3616	5.29135e-06	7.41935e-05
RND3	0.814914	1.14792	0.333004	1.75905	12.3466	5.36845e-06	7.52274e-05
LOC101926953	-0.659592	0.585378	1.24497	2.41934	12.3404	5.40095e-06	7.56353e-05
SAAL1	-0.563819	-1.08782	-0.524005	2.41748	12.3235	5.48975e-06	7.67826e-05
LOC105369175	-0.360538	-1.22241	-0.861871	2.03704	12.3213	5.5015e-06	7.69227e-05
C1ORF87	0.27926	1.01135	0.732086	1.6362	12.3191	5.51309e-06	7.70366e-05
FENDRR	-0.614987	0.729062	1.34405	2.01194	12.3155	5.53237e-06	7.72818e-05
PDCL3	0.404705	-0.885737	-1.29044	1.84208	12.3114	5.55446e-06	7.75653e-05
MNT	1.22985	0.870661	-0.359186	2.76773	12.311	5.55641e-06	7.75653e-05
MIB2	1.43224	0.33913	-1.09311	2.83116	12.3048	5.59014e-06	7.79425e-05
SCML2P2	-0.741525	0.478517	1.22004	1.12137	12.3035	5.5967e-06	7.80095e-05
AGAP11	-1.27861	-0.723244	0.55537	1.65967	12.2892	5.67458e-06	7.90457e-05
SELP	0.213254	-0.889856	-1.10311	1.26795	12.2775	5.73943e-06	7.98246e-05
PSMG3-AS1	1.27493	1.0894	-0.185531	2.26573	12.2712	5.77409e-06	8.02316e-05
ATP2B3	1.15086	0.0874445	-1.06341	3.87565	12.2502	5.89294e-06	8.17558e-05
LOC105379516	-0.790216	0.24815	1.03837	3.746	12.2496	5.89627e-06	8.17767e-05
PGRMC1	0.715052	-0.40055	-1.1156	2.00102	12.2462	5.91575e-06	8.20213e-05
LAPTM4B	0.294529	-0.746003	-1.04053	3.02316	12.2141	6.1018e-06	8.42346e-05
LOC105373717	0.615747	-0.764927	-1.38067	3.35154	12.2127	6.10994e-06	8.4321e-05
ABCB10P1	-0.29404	-1.19073	-0.896686	2.82386	12.2065	6.14697e-06	8.47294e-05
ANAPC11	0.27615	-0.865529	-1.14168	2.37904	12.2065	6.14713e-06	8.47294e-05
SNORA70C	-1.00209	-1.10113	-0.0990434	1.34513	12.1815	6.29709e-06	8.65111e-05
RPP21	-0.755754	-1.01702	-0.26127	3.0298	12.177	6.32471e-06	8.68554e-05
FADS6	0.937918	-0.208247	-1.14617	3.98877	12.1737	6.34509e-06	8.70549e-05
HMGN5	-1.05249	-1.01516	0.0373285	2.49117	12.1522	6.47812e-06	8.87165e-05
FAM131B	-0.5025	-1.05647	-0.553967	2.15044	12.1301	6.61772e-06	9.03787e-05
SIGLEC16	-0.95457	0.483733	1.4383	2.32779	12.129	6.62537e-06	9.04291e-05
LDHAP1	-0.867141	0.475539	1.34268	0.918538	12.1143	6.71973e-06	9.15758e-05
PEMT	-0.511127	-1.08758	-0.576455	2.21179	12.1127	6.72998e-06	9.16337e-05
LOC105369179	0.563182	-0.618488	-1.18167	3.95061	12.0912	6.87139e-06	9.3386e-05
CLCN7	1.23744	0.108643	-1.12879	3.4053	12.0868	6.90078e-06	9.37284e-05
FAM81B	1.11446	-0.361662	-1.47612	3.5137	12.0848	6.91404e-06	9.38799e-05
PHLDA2	1.16181	1.09169	-0.0701243	1.42462	12.0808	6.94096e-06	9.41505e-05
MZT1	0.397055	-0.829947	-1.227	2.24499	12.0725	6.99701e-06	9.47759e-05
NBEAP5	0.799864	-0.600092	-1.39996	3.47859	12.0588	7.09009e-06	9.58912e-05
LOC102724691	0.881471	1.0499	0.168427	2.06451	12.0409	7.21436e-06	9.73655e-05
LINC00607	0.303596	-0.924619	-1.22822	2.04084	12.033	7.26949e-06	9.7991e-05
CHRM3-AS2	-0.64783	-1.14694	-0.499105	3.47035	12.0257	7.32111e-06	9.85976e-05
LOC105373730	0.539573	1.02962	0.490048	1.43506	12.0251	7.32527e-06	9.86238e-05
WASH6P	1.42723	0.23835	-1.18888	2.94702	12.0102	7.43156e-06	9.99645e-05
CDK5	0.140813	-0.961431	-1.10224	2.94395	12.0064	7.45856e-06	0.000100297
LINS	0.300594	-0.887374	-1.18797	2.23147	11.9988	7.51352e-06	0.000101006
YBX1	0.522903	-0.657848	-1.18075	3.15742	11.9888	7.58697e-06	0.000101871
SLC16A6	1.33833	0.0978658	-1.24046	3.67536	11.9875	7.59667e-06	0.00010194
SMC5-AS1	-0.498062	-1.11365	-0.615589	3.07595	11.9818	7.63836e-06	0.000102438
LOC105372666	0.197432	-0.870133	-1.06756	1.43153	11.9756	7.68426e-06	0.000102991
FTCDNL1	0.548842	-0.62744	-1.17628	2.30708	11.969	7.7335e-06	0.00010362
TMPOP1	-0.359449	0.831475	1.19092	2.83853	11.9513	7.86671e-06	0.000105279
CRYGGP	-0.693861	-1.02117	-0.327306	1.17068	11.9442	7.92159e-06	0.000105981
MXD3	1.2675	0.887533	-0.379966	1.62135	11.9319	8.01597e-06	0.000107116
DNAJB7	-0.336982	0.727623	1.0646	1.47451	11.9239	8.07803e-06	0.000107848
RBMX	-1.0386	-0.298454	0.740144	2.81627	11.9163	8.13768e-06	0.000108579
RNY5P8	-0.236606	-1.07653	-0.839927	1.74286	11.9103	8.1852e-06	0.000109116
FAM117A	1.56721	0.58894	-0.978267	2.17933	11.9094	8.19237e-06	0.000109179
TFPI	-1.44266	-0.264535	1.17813	1.53679	11.9065	8.21578e-06	0.000109434
TMEM147	0.335672	-0.830342	-1.16601	2.55383	11.9056	8.22239e-06	0.000109481
CUEDC2	-0.626378	-1.02912	-0.402739	2.79856	11.9047	8.22985e-06	0.000109487
LOC105377547	0.800477	1.04591	0.245433	3.57748	11.9011	8.25806e-06	0.000109825
LOC286189	-1.00088	0.176212	1.17709	1.29049	11.8925	8.32734e-06	0.000110614
TMEM191A	0.243684	-0.942393	-1.18608	2.84625	11.8903	8.34537e-06	0.000110821
C7ORF25	0.0270616	-1.04823	-1.07529	2.13023	11.8875	8.36744e-06	0.000111081
LOC105376094	1.239	0.963908	-0.275091	2.88427	11.8677	8.52925e-06	0.000112927
BZRAP1-AS1	-0.0544477	-1.00212	-0.947676	1.74042	11.8645	8.55586e-06	0.000113245
CYP2C18	1.06733	0.927595	-0.13973	1.41315	11.8541	8.64286e-06	0.000114329
LINC00087	1.49355	0.64505	-0.848502	2.84496	11.8449	8.72022e-06	0.000115182
LOC105377299	0.340345	-0.870696	-1.21104	2.92044	11.8418	8.74592e-06	0.000115453
LOC105373594	-0.168668	-1.07991	-0.91124	1.39272	11.8336	8.81532e-06	0.000116335
HMGN1P32	-0.724799	0.362034	1.08683	3.62559	11.8199	8.93322e-06	0.000117705
STX10	0.382049	-0.878483	-1.26053	2.48765	11.8167	8.96088e-06	0.000117942
ATP6V1G2-DDX39B	0.621559	-0.62819	-1.24975	2.16086	11.8149	8.97675e-06	0.000118081
LOC105376493	1.11787	0.62177	-0.496096	0.81536	11.8133	8.99096e-06	0.000118233
CCDC184	1.02953	-0.425852	-1.45538	3.45214	11.8102	9.01727e-06	0.00011849
ZNF223	-0.283104	-1.10633	-0.823222	2.27161	11.7979	9.1259e-06	0.000119725
SMARCA1	0.42176	-0.613679	-1.03544	3.70516	11.7713	9.3634e-06	0.000122625
BDP1P	-0.731583	0.545247	1.27683	1.55288	11.7571	9.4933e-06	0.000124035
TOP3BP1	0.9752	1.02498	0.0497801	1.48637	11.7534	9.52719e-06	0.000124405
NOP10	-0.0923204	-1.01422	-0.921903	2.42061	11.753	9.53096e-06	0.000124418
TTC9B	0.260204	-0.863034	-1.12324	2.97871	11.7517	9.54234e-06	0.000124494
NPC2	0.358019	-0.758374	-1.11639	2.24278	11.7464	9.59152e-06	0.000125071
FAM103A1	0.30179	-0.895393	-1.19718	1.54627	11.7387	9.66368e-06	0.000125893
C6	1.22451	0.978021	-0.246484	1.81826	11.7334	9.71296e-06	0.000126387
TECRL	-0.218345	0.794769	1.01311	2.65874	11.7321	9.72536e-06	0.000126512
TIPARP	1.32556	0.824052	-0.501511	3.31295	11.7288	9.7567e-06	0.000126846
FSTL1	0.45133	-0.778747	-1.23008	1.93711	11.7005	1.00279e-05	0.000130143
LIN7C	1.14752	-0.0294398	-1.17696	2.77862	11.6995	1.00376e-05	0.000130232
42618	1.14731	0.0521914	-1.09512	3.65069	11.6991	1.00411e-05	0.00013024
LOC101929347	1.44888	-0.116119	-1.565	2.11296	11.6952	1.00787e-05	0.000130689
MAFG	1.27242	0.322795	-0.94963	3.45043	11.6943	1.00879e-05	0.000130771
IFT81	-1.12337	-0.467371	0.656003	3.39352	11.6937	1.00935e-05	0.000130805
IQSEC3P2	0.503075	-0.941273	-1.44435	3.22596	11.6903	1.01266e-05	0.000131121
SNORD22	-0.336304	-1.06772	-0.731416	1.22101	11.6899	1.01306e-05	0.000131134
IL1RL2	0.233255	-1.05373	-1.28698	2.74479	11.6813	1.02159e-05	0.000132085
LOC100506844	0.0461604	-1.00184	-1.048	2.49162	11.6747	1.02808e-05	0.000132886
LOC105370841	-0.494655	-1.07881	-0.584152	3.34311	11.6668	1.03599e-05	0.000133791
OSCP1	-0.435275	-1.09508	-0.659801	2.41657	11.6528	1.05011e-05	0.00013542
TAF1B	-1.26217	-0.76157	0.500599	2.42036	11.6368	1.06653e-05	0.000137382
POC5	-0.281277	-1.00954	-0.728261	2.56697	11.6368	1.06656e-05	0.000137382
LOC105377506	-0.392645	-1.02725	-0.634609	1.47391	11.6335	1.06992e-05	0.000137735
LINC00696	-0.722018	0.618326	1.34034	2.583	11.6196	1.08438e-05	0.000139356
TREML2	-0.913519	0.0891368	1.00266	0.525803	11.6149	1.08941e-05	0.000139761
ENPP5	0.774424	-0.551677	-1.3261	3.10334	11.614	1.09037e-05	0.000139843
SPON1	0.885565	-0.304138	-1.1897	3.47044	11.6136	1.09069e-05	0.000139845
ZNF367	0.187139	-0.960118	-1.14726	2.15099	11.5946	1.11099e-05	0.000142203
SLC7A9	1.41092	0.734579	-0.676339	1.7171	11.5871	1.11908e-05	0.000143033
SUPT6H	0.3656	-0.658388	-1.02399	3.53333	11.5784	1.12856e-05	0.000144162
CDH6	0.983015	-0.177473	-1.16049	2.18806	11.5724	1.13516e-05	0.000144922
LOC102723412	-0.815882	0.451729	1.26761	3.27528	11.5599	1.14895e-05	0.000146472
RPS14P4	1.38188	0.853501	-0.528377	1.70701	11.5354	1.17652e-05	0.000149688
SMAD3	0.709999	-0.47296	-1.18296	3.19289	11.5225	1.19136e-05	0.000151275
KRT14	-1.25661	-1.17809	0.0785271	1.73973	11.5187	1.19574e-05	0.000151749
LOC105378720	1.43418	0.814404	-0.61978	2.14865	11.5186	1.19578e-05	0.000151749
LOC105369438	-0.406762	0.813123	1.21989	3.62612	11.5175	1.1971e-05	0.000151874
PUS3	-0.0887164	-1.00072	-0.912003	1.93956	11.5116	1.20399e-05	0.000152646
LOC105374054	-0.539228	0.603917	1.14315	2.00371	11.5114	1.20421e-05	0.000152646
COPRS	0.316505	-0.803112	-1.11962	3.00821	11.5085	1.20761e-05	0.000153033
TUBB8	1.10404	0.923888	-0.180154	1.73523	11.5045	1.2122e-05	0.000153572
RPL29P25	-0.819883	0.201196	1.02108	0.465298	11.4929	1.22592e-05	0.000155222
KIAA1257	1.40694	0.5587	-0.848243	2.414	11.4885	1.23117e-05	0.000155799
LOC102724947	0.744312	-0.260295	-1.00461	2.98455	11.4697	1.25385e-05	0.000158175
ABHD17A	1.08517	-0.282392	-1.36756	3.18696	11.4664	1.25777e-05	0.000158625
EZH2	0.400484	-0.826512	-1.227	2.14507	11.4605	1.26498e-05	0.000159354
LOC105377751	1.38017	0.798398	-0.581767	3.00543	11.4602	1.26542e-05	0.000159364
PPAN	0.149374	-0.934753	-1.08413	1.54258	11.4581	1.26803e-05	0.000159559
RSPH1	1.37235	-0.172719	-1.54507	2.16069	11.4538	1.27328e-05	0.000160038
SAXO2	0.605411	-0.654479	-1.25989	2.96698	11.4499	1.27812e-05	0.000160511
CSNK1D	0.776853	-0.254846	-1.0317	3.73015	11.4378	1.29314e-05	0.000162032
PRR14L	1.05088	0.104956	-0.945928	3.76707	11.4344	1.29737e-05	0.000162518
HPSE2	-1.13687	-0.678482	0.45839	1.70603	11.4309	1.30176e-05	0.000162976
HMGB1P10	-0.345431	-1.03538	-0.689947	2.13232	11.4305	1.3023e-05	0.000162997
LRRC75A	1.10723	0.832082	-0.275145	1.34675	11.4274	1.30619e-05	0.000163393
LOC105372104	1.22603	-0.350963	-1.577	2.4382	11.426	1.30799e-05	0.000163549
OR13K1P	-0.886364	0.350437	1.2368	0.854276	11.4241	1.31048e-05	0.000163791
TMCC2	1.05896	-0.0396354	-1.0986	3.41877	11.4214	1.31379e-05	0.000164022
SEC61A1	1.10187	-0.167026	-1.2689	3.15833	11.4195	1.31627e-05	0.000164239
ITGA10	1.0007	0.680916	-0.319786	0.907317	11.3931	1.35041e-05	0.000167936
MIF-AS1	0.159094	-0.976914	-1.13601	2.07757	11.3908	1.35342e-05	0.000168123
LOC105378853	-0.0597314	-1.1085	-1.04877	2.40336	11.388	1.35704e-05	0.000168526
AKR1C1	-1.35278	-0.431209	0.921568	3.2888	11.3836	1.36285e-05	0.000169201
PRC1	0.457165	-0.822816	-1.27998	2.53457	11.3786	1.36948e-05	0.000169881
LOC101928191	1.28135	0.869037	-0.412317	1.99888	11.3735	1.37627e-05	0.000170629
CLTB	0.396229	-0.603952	-1.00018	4.04675	11.3531	1.40365e-05	0.000173676
CCT5	0.524062	-0.647693	-1.17176	2.98497	11.3473	1.41157e-05	0.000174521
EP400NL	0.618128	-0.690136	-1.30826	2.26108	11.3392	1.42281e-05	0.000175667
LOC105376434	1.37539	0.784239	-0.59115	3.48261	11.3283	1.43786e-05	0.000177231
LOC105375178	-0.701239	-1.02065	-0.319409	3.57934	11.3232	1.44502e-05	0.000178065
ALG5	0.491061	-0.69331	-1.18437	3.03686	11.3149	1.45657e-05	0.000179241
IMPG1	1.39315	0.645945	-0.747204	1.64394	11.311	1.46219e-05	0.000179883
VSTM5	-0.488645	-1.15178	-0.663133	2.7091	11.2843	1.50053e-05	0.000184192
LOC105378115	1.66667	0.546786	-1.11988	2.22125	11.2773	1.5107e-05	0.000185136
XRCC6P2	0.769018	1.07509	0.306069	1.75805	11.2627	1.53223e-05	0.000187466
PHKG2	0.785899	-0.21809	-1.00399	3.94293	11.2506	1.55029e-05	0.000189416
WDR78	1.18947	0.713735	-0.475735	3.14211	11.2453	1.55823e-05	0.000190295
ASB1	0.375482	-0.808281	-1.18376	1.91468	11.2322	1.57815e-05	0.000192504
BCAR1	1.32947	0.28576	-1.04371	2.75077	11.2202	1.59664e-05	0.00019458
LOC100128239	-0.30357	-1.03522	-0.731653	1.28419	11.2114	1.61024e-05	0.000196087
ARRDC4	0.353535	-0.728394	-1.08193	1.29372	11.1956	1.63507e-05	0.000198417
ILF2	0.573562	-0.683783	-1.25735	2.24727	11.1947	1.63652e-05	0.000198478
FAM8A1	1.18424	0.00789829	-1.17634	3.19893	11.1945	1.63691e-05	0.000198478
LOC105371307	0.0803642	1.10572	1.02536	2.65837	11.1692	1.67759e-05	0.000203026
HBA1	0.241405	-0.955439	-1.19684	1.79601	11.1432	1.72027e-05	0.000207628
PITPNM1	1.0423	-0.0300869	-1.07238	4.21527	11.1392	1.727e-05	0.000208319
POLQ	1.23809	0.515551	-0.722534	1.47546	11.1387	1.72787e-05	0.000208319
SLC9A3	1.23454	-0.33874	-1.57328	2.21094	11.1367	1.73129e-05	0.000208676
SNORD113-7	1.46086	0.939659	-0.521198	1.87694	11.1209	1.758e-05	0.000211609
CHGB	0.473483	-0.715513	-1.189	3.02743	11.0964	1.80022e-05	0.000215819
ALPP	-0.47022	0.745209	1.21543	1.55563	11.0938	1.80473e-05	0.000216203
CCDC69	0.626963	-0.463622	-1.09058	3.97363	11.0894	1.8125e-05	0.000216964
C18ORF21	-0.181997	-1.03235	-0.850353	2.25102	11.0893	1.81269e-05	0.000216964
P4HA2-AS1	0.941394	1.03214	0.0907437	1.81743	11.0884	1.8142e-05	0.000217087
LOC105377064	-0.385824	-1.12679	-0.740968	2.41038	11.088	1.81492e-05	0.000217114
PECR	0.403762	-0.679814	-1.08358	3.33961	11.0802	1.8287e-05	0.000218528
WT1-AS	-0.406444	0.763728	1.17017	1.73537	11.0501	1.88277e-05	0.000224389
LOC105378688	1.08203	0.820872	-0.261156	1.20012	11.0465	1.88946e-05	0.000225006
NARSP1	-0.230749	0.78184	1.01259	2.85116	11.0402	1.90106e-05	0.000226207
LOC105378855	0.886393	-0.541579	-1.42797	1.50597	11.0397	1.90191e-05	0.000226247
TMPRSS9	0.626648	1.14001	0.513359	2.14023	11.0389	1.90342e-05	0.000226367
CPD	0.795469	-0.205536	-1.00101	3.13201	11.0182	1.94206e-05	0.000230593
ZGLP1	0.742096	1.00798	0.265882	1.54167	11.0162	1.94582e-05	0.000230865
PDIK1L	0.522642	-0.757179	-1.27982	2.33117	11.0014	1.9738e-05	0.000233927
C17ORF70	-0.254154	-1.0226	-0.768441	3.09955	10.9955	1.98518e-05	0.00023515
SLC22A18	1.18999	0.973947	-0.216046	1.60535	10.9918	1.99226e-05	0.000235865
CCNE1	-0.960941	-1.07331	-0.112372	1.92488	10.9902	1.99537e-05	0.000236108
LOC105369437	0.152967	-0.954489	-1.10746	1.85631	10.9713	2.03241e-05	0.000239855
LOC105374279	0.234883	-0.933312	-1.1682	2.12839	10.9709	2.03306e-05	0.000239868
DRAM2	-1.01523	-0.741735	0.273494	3.16707	10.9594	2.05589e-05	0.000242369
HAS1	0.613249	-0.615058	-1.22831	1.07924	10.9587	2.05741e-05	0.00024242
FSBP	0.158156	-0.932106	-1.09026	1.64939	10.9568	2.06104e-05	0.00024272
PHEX	-0.721897	0.354352	1.07625	1.09366	10.9522	2.07023e-05	0.000243663
NPIPB9	1.28275	0.543069	-0.739679	2.7977	10.9481	2.07848e-05	0.000244387
ELL	0.547538	-0.676257	-1.22379	2.98724	10.9361	2.10281e-05	0.00024686
LOC105379480	-0.89176	0.435085	1.32685	1.63825	10.9359	2.10339e-05	0.00024686
LOC100996579	0.263676	-0.955779	-1.21945	1.51171	10.9357	2.10381e-05	0.00024686
PDZD4	1.20335	0.821427	-0.381924	3.23543	10.9356	2.10394e-05	0.00024686
RBMY2OP	-0.887966	0.469695	1.35766	1.62379	10.9267	2.12215e-05	0.000248866
SH2D4A	-0.439589	-1.04101	-0.601421	1.81596	10.9239	2.12799e-05	0.000249485
SCRT2	-0.125543	-1.05352	-0.927973	1.97084	10.9171	2.14203e-05	0.000250803
SLC39A14	0.813561	-0.383225	-1.19679	3.87085	10.9109	2.15494e-05	0.000252247
NOL6	1.29928	0.705698	-0.593584	3.48884	10.9105	2.1558e-05	0.000252283
LOC105374992	0.711997	-0.633804	-1.3458	1.22758	10.9029	2.17175e-05	0.000254015
DHFRL1	0.136409	-0.87292	-1.00933	1.96932	10.9017	2.17416e-05	0.00025423
KIAA1524	0.315438	-0.860404	-1.17584	2.9537	10.8737	2.2341e-05	0.000260761
MMAA	0.815553	-0.576707	-1.39226	2.29237	10.8694	2.24348e-05	0.00026172
MYH14	1.01389	0.415565	-0.598325	3.85274	10.8667	2.2493e-05	0.00026233
CCDC179	1.51177	0.378787	-1.13298	3.71387	10.8605	2.26281e-05	0.000263768
LOC102724612	-0.375724	0.720952	1.09668	1.60369	10.8484	2.28967e-05	0.000266332
LOC105378498	0.478492	-0.748258	-1.22675	1.137	10.8428	2.30203e-05	0.000267502
MIR22HG	0.746458	-0.608986	-1.35544	3.41131	10.8409	2.30643e-05	0.000267804
TWISTNB	0.48709	-0.790899	-1.27799	2.41539	10.8366	2.31589e-05	0.000268832
CNKSR3	-1.16259	0.0971517	1.25974	2.19732	10.8236	2.34546e-05	0.000271771
DFNA5	0.558949	-0.626586	-1.18554	2.94605	10.8207	2.3519e-05	0.000272375
TMUB2	0.266059	-0.780329	-1.04639	2.75672	10.8019	2.39527e-05	0.000276895
HRH3	1.04089	0.224691	-0.816202	4.21068	10.7775	2.45268e-05	0.0002828
TTC5	0.720853	-0.617208	-1.33806	2.3511	10.7635	2.48631e-05	0.000286307
CISD1P1	-0.562203	-1.06536	-0.503157	1.64626	10.7525	2.51286e-05	0.000288992
FBXL6	0.00683344	-1.01219	-1.01902	2.89045	10.7446	2.53219e-05	0.000291065
LOC101269108	1.02069	0.764201	-0.256485	0.88116	10.7443	2.53296e-05	0.000291079
TAF7L	1.01258	0.823306	-0.189274	1.07432	10.7397	2.5444e-05	0.000292092
LOC101929607	1.46279	0.734922	-0.727865	1.6353	10.7212	2.59047e-05	0.000296999
CLCN2	1.43317	0.497235	-0.935935	2.50804	10.6961	2.65437e-05	0.000303624
PIGG	0.559678	-0.542952	-1.10263	3.23591	10.6916	2.66595e-05	0.000304715
SPON2	0.382456	1.0498	0.66734	2.06077	10.6723	2.71641e-05	0.000310085
LOC105376436	1.34006	0.833556	-0.506504	2.54976	10.6678	2.72827e-05	0.000311041
ZNF786	0.249085	-0.789643	-1.03873	2.51562	10.662	2.74368e-05	0.00031261
LOC105370170	-0.342436	-1.0517	-0.709261	2.17819	10.6618	2.74413e-05	0.00031261
LOC105374198	0.216345	-0.873273	-1.08962	2.55322	10.6569	2.75725e-05	0.000313864
LOC105373786	-1.36688	-0.437138	0.929739	1.72038	10.646	2.78653e-05	0.000316873
GREB1L	0.973887	-0.212565	-1.18645	3.49723	10.645	2.78917e-05	0.000317078
EVC	0.520493	-0.660972	-1.18146	2.1442	10.6309	2.82774e-05	0.000320829
C12ORF57	0.235682	-0.838408	-1.07409	2.39748	10.6265	2.83983e-05	0.000322033
RNU6-33P	-0.577825	0.545088	1.12291	0.880326	10.6119	2.88036e-05	0.000326297
PREB	0.521741	-0.794355	-1.3161	2.17072	10.6004	2.9127e-05	0.000329542
DAB2	-1.19391	-0.394539	0.799372	3.41835	10.5813	2.96705e-05	0.000334505
HAPLN4	0.873331	-0.225307	-1.09864	4.00822	10.5765	2.98094e-05	0.000335979
GFI1B	-0.355454	0.7769	1.13235	2.00423	10.5563	3.03995e-05	0.000341688
LOC285423	1.37166	0.553057	-0.818601	2.88081	10.5519	3.05319e-05	0.00034309
OSTF1	0.563751	-0.607937	-1.17169	3.3961	10.549	3.0615e-05	0.000343678
EIF3J-AS1	0.244055	-0.783531	-1.02759	1.86806	10.547	3.06765e-05	0.000344281
ACTN4	1.04207	0.404256	-0.637812	3.14665	10.5382	3.0938e-05	0.000346607
BNIP3P27	-1.16659	0.0912385	1.25783	1.25026	10.5379	3.09471e-05	0.000346622
POP7	-0.420688	-1.04463	-0.623945	1.86861	10.5336	3.10767e-05	0.000347811
DMKN	0.532308	-0.826758	-1.35907	1.79188	10.5297	3.11949e-05	0.000348959
SEC31B	0.689192	-0.415499	-1.10469	3.81	10.5175	3.15686e-05	0.000352521
FBXO7	0.6457	-0.367606	-1.01331	3.01597	10.5048	3.19587e-05	0.000356699
N6AMT1	0.279755	-0.780219	-1.05997	2.3636	10.4931	3.23228e-05	0.000360493
ATMIN	0.729428	-0.442286	-1.17171	3.46217	10.4712	3.30197e-05	0.000367073
FAM86HP	0.849087	-0.608364	-1.45745	2.32472	10.4463	3.38288e-05	0.000374947
INAFM1	0.539364	-0.723572	-1.26294	2.18038	10.4383	3.40907e-05	0.000377569
SUMO2P1	-0.849769	0.332191	1.18196	1.12372	10.4165	3.48189e-05	0.000384015
GABRA2	-1.02704	-0.319942	0.707093	3.80096	10.4097	3.50522e-05	0.0003863
VWC2	0.936212	-0.216002	-1.15221	2.50756	10.4081	3.51042e-05	0.000386778
LOC148709	-0.432551	0.622514	1.05506	2.24034	10.4054	3.51973e-05	0.000387613
FBXW5	1.10482	-0.218673	-1.32349	3.23142	10.4045	3.52297e-05	0.000387874
LOC105371068	0.846371	-0.557681	-1.40405	3.15214	10.4012	3.53411e-05	0.000388909
AAR2	0.322462	-0.813193	-1.13565	2.11215	10.4004	3.5368e-05	0.000389059
LOC105379106	0.848262	-0.437688	-1.28595	3.21816	10.3997	3.53944e-05	0.000389207
LOC105369508	-1.04383	-0.824365	0.219467	1.76519	10.3987	3.54263e-05	0.000389463
SLC6A16	1.48373	0.504842	-0.978886	1.71387	10.3915	3.56767e-05	0.000391829
LOC105370817	1.31225	0.867633	-0.444612	2.30186	10.3856	3.58808e-05	0.000393738
LOC105377128	-1.28505	-0.0423448	1.2427	1.22675	10.3716	3.63721e-05	0.00039878
CEMIP	1.21192	0.296813	-0.915103	2.96217	10.3688	3.64705e-05	0.000399467
AURKA	1.24421	0.742009	-0.502203	1.98886	10.3623	3.67025e-05	0.000401909
LOC105370348	1.17086	0.87542	-0.29544	1.38667	10.3615	3.6733e-05	0.000402046
KANSL2	0.523711	-0.617682	-1.14139	2.84014	10.3601	3.67818e-05	0.000402324
HCN4	1.36281	0.297923	-1.06488	1.65378	10.3597	3.67945e-05	0.000402324
MRFAP1L1	0.529095	-0.646776	-1.17587	2.96803	10.3525	3.70533e-05	0.000404806
RD3	-0.57975	0.540148	1.1199	2.44854	10.3524	3.70577e-05	0.000404806
MIR29C	0.380207	-0.720087	-1.10029	3.89358	10.3487	3.71896e-05	0.000406048
SRPX	0.525113	-0.695082	-1.22019	1.4159	10.329	3.79085e-05	0.000412384
LOC100507391	0.101145	1.01853	0.917381	1.65232	10.3261	3.8017e-05	0.000413196
NDUFA4P1	-1.18572	-0.654002	0.531722	1.2362	10.3259	3.80252e-05	0.000413196
FAM69C	1.07631	-0.305609	-1.38192	1.96513	10.3257	3.80294e-05	0.000413196
LOC101928126	-0.217638	0.791401	1.00904	1.83402	10.3158	3.83981e-05	0.000416898
AP5Z1	0.630069	-0.534923	-1.16499	3.37821	10.3146	3.84431e-05	0.000417183
LOC102724726	0.313607	-0.703817	-1.01742	0.964058	10.309	3.86515e-05	0.000419038
LOC285740	1.23736	0.561863	-0.675492	3.84418	10.3083	3.86806e-05	0.00041917
BMP5	-1.1896	-1.03037	0.159238	2.53722	10.3036	3.88552e-05	0.000420734
LOC105376350	1.3608	0.219096	-1.1417	1.21705	10.2854	3.95497e-05	0.000426978
AKR1C7P	-0.508758	0.516683	1.02544	3.26868	10.2792	3.97896e-05	0.00042898
LOC102724687	1.06464	0.850518	-0.214118	2.42761	10.2785	3.98177e-05	0.00042918
SPC24	-0.801075	0.265788	1.06686	2.86403	10.2661	4.02973e-05	0.000433609
SPNS1	0.190181	-0.850453	-1.04063	2.54159	10.2648	4.03494e-05	0.000433968
OSBPL7	1.14687	0.890785	-0.256083	2.41659	10.2636	4.03979e-05	0.000434175
ASF1A	0.752618	-0.607434	-1.36005	2.46141	10.2553	4.07222e-05	0.00043724
ANKLE2	0.457366	-0.653897	-1.11126	3.07833	10.2543	4.07636e-05	0.000437474
SQLE	0.778025	-0.295698	-1.07372	3.09653	10.2461	4.10884e-05	0.000440536
LOC102723643	1.0362	0.752882	-0.283318	1.01746	10.2356	4.15108e-05	0.000444637
[truncated: 437 more rows]
