# Supplementary material for: Single-cell and single-nucleus RNA-seq uncovers shared and distinct axes of variation in dorsal LGN neurons in mice, non-human primates, and humans
Source: eLife. 2021 Sep 2;10:e64875. doi: 10.7554/eLife.64875 (PMC8412930; doi:10.7554/eLife.64875)
Supplement: Supplementary file 4. — The table shows the top 20 differentially expressed genes between a given cluster and all other cell types. [file elife-64875-supp4.xlsx]

## Sheet: Cluster_markers_macaque
cluster	gene	p_val	avg_logFC	pct.1	pct.2	p_val_adj
GABA1	ZEB2	1.23732e-80	1.97453	1	0.145	2.19092e-76
GABA1	CXCL14	9.1795e-44	1.95413	0.849	0.19	1.62541e-39
GABA1	GRIN3A	8.97841e-39	1.9901	1	0.509	1.58981e-34
GABA1	TCF4	1.28141e-37	2.38955	1	0.599	2.269e-33
GABA1	EGFR	3.74633e-37	1.96334	1	0.597	6.63363e-33
GABA1	NXPH1	8.50744e-36	2.69991	1	0.778	1.50641e-31
GABA1	FBXL7	1.35942e-35	2.77643	1	0.854	2.40712e-31
GABA1	ERBB4	1.61419e-35	3.76602	1	0.968	2.85824e-31
GABA1	ZNF536	1.64543e-35	2.22572	1	0.835	2.91356e-31
GABA1	MGAT4C	1.92446e-35	2.34083	1	0.908	3.40764e-31
GABA1	TMEM132D	2.20261e-35	2.56271	1	0.932	3.90017e-31
GABA1	PHACTR1	4.59636e-35	2.36224	1	0.924	8.13878e-31
GABA1	MCTP1	8.05921e-35	2.20975	1	0.922	1.42705e-30
GABA1	GABRG3	8.59134e-35	2.17203	1	0.899	1.52127e-30
GABA1	HTR1F	1.47753e-34	2.09078	1	0.668	2.61626e-30
GABA1	PCDH11X	3.24116e-34	2.32235	1	0.97	5.73913e-30
GABA1	KCNQ5	8.99008e-33	2.2529	1	0.946	1.59187e-28
GABA1	KIRREL3	1.29511e-32	2.36012	1	0.812	2.29324e-28
GABA1	SGCZ	3.80961e-31	2.04382	1	0.99	6.74568e-27
GABA1	EXT1	6.00065e-31	1.91968	1	0.976	1.06254e-26
GABA2	GAD1	2.49803e-51	1.6838	1	0.368	4.42327e-47
GABA2	CDH4	3.06071e-44	2.24748	1	0.81	5.41961e-40
GABA2	KCNIP1	4.69279e-44	2.08943	1	0.633	8.30953e-40
GABA2	CA10	3.04864e-43	2.26112	1	0.795	5.39823e-39
GABA2	PTPRT	1.14038e-42	2.34803	1	0.927	2.01927e-38
GABA2	NKAIN3	1.04316e-41	1.92452	1	0.89	1.84713e-37
GABA2	SLC35F4	4.11708e-41	1.65802	1	0.861	7.29012e-37
GABA2	GRIA1	4.66734e-41	1.78323	1	0.656	8.26446e-37
GABA2	LRRC4C	9.86996e-41	1.72185	1	0.997	1.74767e-36
GABA2	MAML2	6.47806e-39	1.6572	1	0.804	1.14707e-34
GABA2	RELN	1.59251e-38	1.65375	1	0.89	2.81986e-34
GABA2	GRIK1	2.00124e-38	1.60509	1	1	3.5436e-34
GABA2	PCBP3	4.91101e-38	1.61582	1	0.963	8.69593e-34
GABA2	KIAA1217	4.94096e-38	1.94841	1	0.98	8.74895e-34
GABA2	UNC5D	8.15122e-38	1.62994	1	0.999	1.44334e-33
GABA2	TRPM3	9.0628e-37	1.66463	1	0.955	1.60475e-32
GABA2	ZFPM2	8.44027e-35	1.65274	1	0.988	1.49452e-30
GABA2	SNTG1	1.17697e-34	1.60468	1	0.987	2.08406e-30
GABA2	SYNPR	1.31506e-34	1.64414	1	0.633	2.32858e-30
GABA2	NRXN3	4.38894e-33	1.65269	1	0.999	7.77149e-29
GABA3	BMPR1B	5.22842e-148	2.21542	1	0.707	9.25797e-144
GABA3	NYAP2	5.68258e-148	2.14817	1	0.979	1.00621e-143
GABA3	RGS6	9.7588e-148	2.2856	1	0.922	1.72799e-143
GABA3	SYNPR	1.13941e-147	2.36962	1	0.59	2.01755e-143
GABA3	ST6GALNAC3	1.17099e-144	1.78724	1	0.991	2.07348e-140
GABA3	GALNTL6	1.43991e-144	2.00575	1	0.994	2.54964e-140
GABA3	NELL1	3.76869e-144	2.1639	1	0.975	6.67322e-140
GABA3	PLCB1	2.76299e-143	2.45888	1	0.84	4.89242e-139
GABA3	LRRTM4	2.12671e-141	2.15934	1	0.959	3.76577e-137
GABA3	DSCAML1	2.536e-141	2.17054	1	0.631	4.49049e-137
GABA3	SPHKAP	4.72946e-141	2.02994	1	0.696	8.37446e-137
GABA3	MEIS2	1.50654e-139	1.86856	1	0.772	2.66763e-135
GABA3	PACRG	3.26014e-138	1.7753	1	0.91	5.77273e-134
GABA3	LUZP2	1.61927e-137	1.82043	1	0.875	2.86723e-133
GABA3	ROBO2	1.52069e-135	2.12058	1	0.996	2.69268e-131
GABA3	GPC6	1.62635e-135	2.00307	0.996	0.916	2.87978e-131
GABA3	NRXN3	4.76649e-135	2.28625	1	0.999	8.44003e-131
GABA3	ZFPM2	1.23472e-134	2.10264	1	0.987	2.18632e-130
GABA3	SGCZ	2.5764e-133	2.40127	1	0.989	4.56203e-129
GABA3	KIAA1217	6.83012e-133	2.16199	1	0.978	1.20941e-128
GABA4	ADAMTS6	3.03153e-16	1.46673	1	0.932	5.36793e-12
GABA4	BMPR1B	3.09695e-16	1.97695	1	0.743	5.48377e-12
GABA4	SDK1	3.69017e-16	1.64559	1	0.99	6.53419e-12
GABA4	GRIK1	4.0616e-16	1.61783	1	1	7.19188e-12
GABA4	MEIS2	7.22388e-16	1.7	1	0.8	1.27913e-11
GABA4	NRXN3	5.56265e-15	1.70835	1	0.999	9.84978e-11
GABA4	RELN	9.65841e-15	1.43467	1	0.893	1.71021e-10
GABA4	SNTG1	1.65076e-14	1.54523	1	0.987	2.92301e-10
GABA4	KCNQ5	1.79921e-14	1.53647	1	0.946	3.18586e-10
GABA4	LRRTM4	8.99119e-14	1.51865	1	0.964	1.59207e-09
GABA4	SGCZ	9.62868e-14	1.69791	1	0.99	1.70495e-09
GABA4	LYPD6	9.95923e-14	1.38466	0.923	0.54	1.76348e-09
GABA4	GPC6	1.2326e-13	1.56522	1	0.926	2.18257e-09
GABA4	ROBO2	1.3778e-13	1.54518	1	0.996	2.43967e-09
GABA4	SPHKAP	2.01244e-13	1.41908	1	0.733	3.56344e-09
GABA4	NYAP2	2.01255e-13	1.43202	1	0.982	3.56362e-09
GABA4	PTPRT	2.10301e-13	1.4427	1	0.928	3.7238e-09
GABA4	PDE4B	7.73736e-13	1.35995	1	0.926	1.37005e-08
GABA4	ZFPM2	2.72403e-12	1.37956	1	0.988	4.82345e-08
GABA4	GPC5	2.48261e-08	1.72481	1	0.987	0.000439597
M	EBF1	9.1672e-152	0.972344	0.974	0.54	1.62324e-147
M	MACROD2	5.49837e-130	0.800704	1	1	9.73596e-126
M	EDIL3	1.65476e-104	0.723363	1	0.902	2.93008e-100
M	TTN	6.22851e-100	0.890368	1	0.892	1.10288e-95
M	SLC35F3	7.43466e-99	0.691703	1	0.998	1.31646e-94
M	HS6ST3	1.64002e-97	0.672597	1	0.984	2.90398e-93
M	CDH6	1.53632e-95	0.614768	0.974	0.664	2.72036e-91
M	ATP11A	7.13227e-93	0.597942	1	0.909	1.26291e-88
M	FSTL4	2.12165e-92	0.648192	1	0.964	3.7568e-88
M	LHFPL3	2.16617e-91	0.599481	1	0.996	3.83564e-87
M	ANKRD62	9.84689e-89	0.642803	1	0.886	1.74359e-84
M	HPSE2	3.0396e-88	0.841659	1	0.996	5.38222e-84
M	PLCE1	9.93136e-86	0.595264	0.989	0.86	1.75855e-81
M	ABCA9	1.10423e-85	0.691484	1	0.892	1.95525e-81
M	COL27A1	1.86908e-82	0.648535	0.997	0.698	3.30957e-78
M	TGFBR2	4.70424e-82	0.586374	0.997	0.747	8.3298e-78
M	NEFM	2.84738e-80	0.605613	1	0.901	5.04186e-76
M	PDGFD	1.4735e-76	0.624714	0.997	0.758	2.60913e-72
M	DPF3	1.17325e-75	0.661252	1	0.871	2.07747e-71
M	CDH18	3.77944e-56	0.572142	1	0.997	6.69226e-52
P	CNTN5	1.24121e-189	0.788944	1	0.998	2.19781e-185
P	TCIRG1	9.53138e-179	0.554853	0.95	0.367	1.68772e-174
P	KCNH1	1.92234e-172	0.967354	1	0.972	3.40389e-168
P	PRKG1	2.66076e-155	0.929015	1	0.999	4.7114e-151
P	ZNF804A	4.76584e-136	0.971576	0.997	0.897	8.43887e-132
P	PTPRK	7.38667e-128	0.663262	0.998	0.879	1.30796e-123
P	DPF3	3.41453e-119	0.722301	1	0.845	6.04611e-115
P	TSHZ2	1.12858e-110	0.618538	1	0.985	1.99837e-106
P	HS6ST3	2.7517e-110	0.652569	1	0.981	4.87244e-106
P	CDH12	4.16655e-109	0.70278	1	0.992	7.37771e-105
P	NRG1	5.35137e-108	0.580369	1	0.999	9.47568e-104
P	ESRRG	2.6727e-106	0.639115	1	0.981	4.73255e-102
P	SLC35F3	8.86489e-103	0.60281	1	0.998	1.56971e-98
P	MYO5B	3.69872e-96	0.583386	0.995	0.911	6.54933e-92
P	ZNF804B	3.62201e-94	0.617253	1	0.954	6.41349e-90
P	FRAS1	4.45249e-94	0.620626	0.998	0.937	7.88403e-90
P	CDR1	3.51311e-93	0.648484	1	0.978	6.22066e-89
P	KCTD8	3.58513e-91	0.60178	1	0.951	6.34819e-87
P	THSD4	1.44742e-61	0.590449	1	0.97	2.56295e-57
P	CNBD1	1.67934e-06	0.624006	0.938	0.946	0.0297361
K1	TAFA1	1.59058e-113	1.75322	0.996	0.767	2.81644e-109
K1	GLRA3	3.69747e-74	0.770037	0.973	0.668	6.54712e-70
K1	TGFBR2	7.54784e-69	0.717747	0.992	0.761	1.3365e-64
K1	ATP2B1	1.37141e-67	0.591994	1	0.998	2.42835e-63
K1	SCHIP1	1.78315e-63	0.760415	0.996	0.983	3.15742e-59
K1	IL1RAPL2	2.05533e-60	1.0676	1	0.999	3.63938e-56
K1	NKAIN2	3.27477e-60	0.672119	1	0.986	5.79863e-56
K1	SLIT3	7.67205e-60	0.760848	1	0.974	1.35849e-55
K1	GRM7	7.77384e-58	0.728811	1	0.994	1.37651e-53
K1	DAB1	3.11736e-57	0.544398	1	0.997	5.51991e-53
K1	XKR4	6.71055e-57	0.574383	1	0.996	1.18824e-52
K1	RALYL	2.9221e-55	0.599047	1	0.991	5.17416e-51
K1	FGF13	4.70303e-55	0.770694	0.981	0.933	8.32765e-51
K1	PLCH1	4.83073e-54	0.607709	0.95	0.832	8.55378e-50
K1	PTK2B	1.12531e-52	0.537575	0.996	0.842	1.99258e-48
K1	KALRN	1.25493e-46	0.542352	1	0.987	2.22211e-42
K1	CCBE1	1.21713e-37	0.694493	0.92	0.848	2.15517e-33
K1	RPH3A	7.92161e-37	0.542755	0.996	0.951	1.40268e-32
K1	KCNB2	2.63589e-32	0.631131	0.966	0.887	4.66738e-28
K1	PDZRN4	9.27155e-30	0.552066	0.992	0.918	1.64171e-25
K2	SPARCL1	6.90936e-41	0.870915	0.986	0.544	1.22344e-36
K2	GRID2	1.07451e-40	1.36598	1	0.997	1.90264e-36
K2	KCNMA1	1.29186e-40	0.822317	1	1	2.2875e-36
K2	NECAB1	1.33345e-39	1.07007	1	0.709	2.36114e-35
K2	PDZRN4	5.71806e-37	1.39893	1	0.925	1.0125e-32
K2	ADCY2	2.14564e-36	1.1074	1	0.832	3.79928e-32
K2	SCHIP1	1.15715e-35	1.20308	1	0.984	2.04897e-31
K2	PLCH1	5.18565e-34	0.936035	0.986	0.842	9.18222e-30
K2	GLRA3	7.31367e-33	0.961364	1	0.697	1.29503e-28
K2	TRPM3	6.99668e-32	1.41211	1	0.954	1.2389e-27
K2	CAMK2A	2.36272e-29	0.860835	1	0.667	4.18367e-25
K2	GPC6	2.72979e-28	1.0437	1	0.924	4.83364e-24
K2	CNTNAP5	3.46463e-28	1.13023	1	0.903	6.13482e-24
K2	FGF13	6.17701e-28	1.11825	1	0.937	1.09376e-23
K2	SORCS2	2.56668e-27	1.13045	1	0.928	4.54483e-23
K2	TAFA1	8.26692e-27	1.18322	1	0.789	1.46382e-22
K2	GRM7	2.71637e-26	0.950442	1	0.994	4.80988e-22
K2	KCNB2	1.33124e-25	0.920818	1	0.893	2.35722e-21
K2	RGS6	1.23329e-23	0.945239	1	0.93	2.18379e-19
K2	SGCD	7.29539e-12	0.941095	0.919	0.863	1.29179e-07
Pulv	GRIK3	8.42334e-179	1.14385	0.986	0.346	1.49152e-174
Pulv	PLPP4	1.44078e-165	0.949482	0.978	0.382	2.55118e-161
Pulv	KCND3	6.74649e-142	1.48353	1	0.707	1.1946e-137
Pulv	CAMK2A	5.19681e-140	1.26549	1	0.628	9.20199e-136
Pulv	EPHA6	2.6626e-136	1.24877	1	0.997	4.71466e-132
Pulv	SHISA6	8.56576e-135	1.13408	1	0.973	1.51674e-130
Pulv	CLSTN2	1.8405e-132	1.46495	1	0.899	3.25898e-128
Pulv	GRM7	5.96617e-130	1.34133	1	0.994	1.05643e-125
Pulv	CNTN2	1.01775e-125	0.947456	0.996	0.805	1.80213e-121
Pulv	KALRN	5.00784e-123	0.93076	1	0.987	8.86739e-119
Pulv	IL1RAPL2	7.00863e-123	1.594	1	0.999	1.24102e-118
Pulv	KIRREL3	4.77266e-121	1.812	0.986	0.79	8.45095e-117
Pulv	CCBE1	5.7677e-117	1.15541	1	0.834	1.02129e-112
Pulv	MEGF11	2.66367e-116	1.06534	0.996	0.983	4.71657e-112
Pulv	CTNNA1	4.34022e-114	1.25052	1	0.979	7.68522e-110
Pulv	TAFA4	2.26614e-111	0.983235	0.986	0.76	4.01266e-107
Pulv	PRKCE	1.37511e-108	1.0201	1	0.897	2.4349e-104
Pulv	CNTNAP5	4.82758e-104	1.28195	1	0.892	8.5482e-100
Pulv	FGF13	6.09914e-84	0.939196	1	0.93	1.07998e-79
Pulv	NLGN4Y	8.6874e-79	0.937996	0.993	0.873	1.53828e-74

## Sheet: Cluster_markers_human
cluster	gene	p_val	avg_logFC	pct.1	pct.2	p_val_adj
GABA1	LAMP5	2.36264e-153	2.26756	1	0.038	5.71923e-149
GABA1	BCL11B	9.37495e-152	2.12709	0.982	0.036	2.26939e-147
GABA1	LINC00298	3.79227e-132	2.18971	0.893	0.036	9.17995e-128
GABA1	SOX1	5.67522e-121	2.06548	0.5	0.002	1.3738e-116
GABA1	KCNJ4	3.49465e-113	2.02964	0.571	0.009	8.45951e-109
GABA1	NXPH2	4.13988e-112	2.31038	1	0.075	1.00214e-107
GABA1	C8ORF4	2.78685e-102	2.3708	0.679	0.024	6.74613e-98
GABA1	DLX5	1.17199e-100	2.11629	0.5	0.007	2.83703e-96
GABA1	SLC10A4	3.2801e-95	2.1345	0.732	0.036	7.94015e-91
GABA1	HAPLN1	1.001e-94	2.31686	0.821	0.055	2.42313e-90
GABA1	LINCR-0003	5.12552e-82	2.32488	0.571	0.023	1.24074e-77
GABA1	CBLN4	9.73072e-81	2.13613	0.982	0.125	2.35552e-76
GABA1	CCK	5.25436e-75	2.17381	0.75	0.062	1.27192e-70
GABA1	GRPR	4.60774e-74	2.39884	0.518	0.02	1.1154e-69
GABA1	CXCL14	5.53037e-74	2.06301	0.964	0.139	1.33874e-69
GABA1	DRD1	6.52552e-70	2.35074	0.268	0	1.57963e-65
GABA1	PCP4L1	6.94473e-68	2.03285	0.982	0.161	1.68111e-63
GABA1	TGFB2-OT1	7.04788e-60	2.00908	0.518	0.029	1.70608e-55
GABA1	RELN	2.46988e-41	2.22891	0.982	0.39	5.97883e-37
GABA1	PKP2	4.49017e-41	2.08471	1	0.461	1.08694e-36
GABA2	LINC01210	4.13903e-155	1.77073	0.933	0.028	1.00193e-150
GABA2	SOX14	2.66148e-142	1.75563	0.817	0.021	6.44266e-138
GABA2	OTX2	1.2136e-140	1.77646	0.95	0.039	2.93775e-136
GABA2	UNCX	2.76663e-92	1.74752	0.533	0.013	6.69718e-88
GABA2	NPPC	1.07123e-83	1.60959	0.667	0.035	2.59313e-79
GABA2	PRSS12	2.60717e-74	1.52537	0.8	0.074	6.31118e-70
GABA2	TMEM200C	1.97944e-73	1.49555	0.467	0.015	4.79162e-69
GABA2	TMEM215	5.57596e-73	1.72808	0.533	0.023	1.34977e-68
GABA2	RORB	8.33123e-68	1.52151	0.9	0.124	2.01674e-63
GABA2	PRL	7.71991e-55	1.67357	0.367	0.013	1.86876e-50
GABA2	CTXN3	1.08041e-52	1.50915	0.45	0.026	2.61535e-48
GABA2	SPHKAP	1.40025e-52	1.53718	0.967	0.252	3.38959e-48
GABA2	ZFPM2	7.40757e-49	1.64766	1	0.332	1.79315e-44
GABA2	TRAC	7.25519e-47	1.73236	0.283	0.008	1.75626e-42
GABA2	NTRK1	2.93769e-45	1.79576	0.467	0.037	7.11126e-41
GABA2	DSCR4	7.43246e-44	1.72469	0.483	0.044	1.79918e-39
GABA2	CLNS1AP1	1.2836e-41	1.61391	0.283	0.01	3.10721e-37
GABA2	SAG	1.69055e-20	1.68621	0.317	0.043	4.09232e-16
GABA2	NPSR1	5.71107e-12	1.87793	0.5	0.194	1.38248e-07
GABA2	ZNF728	2.59513e-05	1.59099	0.333	0.142	0.628202
GABA3	NR2F2	2.23262e-44	1.46527	0.962	0.1	5.40449e-40
GABA3	SHISA8	9.2631e-37	1.55937	0.692	0.058	2.24232e-32
GABA3	CASR	2.52355e-36	1.59209	0.769	0.079	6.10877e-32
GABA3	FAM155B	4.7238e-31	1.71422	0.423	0.023	1.14349e-26
GABA3	NPPC	3.49707e-30	1.64223	0.615	0.054	8.46536e-26
GABA3	HGF	3.63873e-28	1.66777	0.5	0.039	8.80827e-24
GABA3	SPHKAP	2.84924e-22	1.51383	0.962	0.273	6.89715e-18
GABA3	DACT1	3.39154e-21	1.52324	0.269	0.014	8.20991e-17
GABA3	CLNS1AP1	1.08224e-16	1.82599	0.269	0.019	2.61977e-12
GABA3	GSTT2B	2.22499e-16	1.51872	0.385	0.04	5.38603e-12
GABA3	SYNPR	3.00937e-15	1.42575	1	0.627	7.28477e-11
GABA3	MYO3B	3.82686e-13	1.54197	1	0.757	9.26368e-09
GABA3	LRRC71	1.31395e-10	1.41153	0.538	0.133	3.18068e-06
GABA3	FIGNL2	1.56135e-10	1.85419	0.269	0.032	3.77956e-06
GABA3	C6ORF7	1.71106e-10	1.79247	0.538	0.132	4.14196e-06
GABA3	LPO	3.55108e-10	1.6329	0.577	0.161	8.5961e-06
GABA3	DMBX1	1.44416e-07	1.55257	0.923	0.686	0.00349587
GABA3	PSTPIP1	1.12334e-05	1.68072	0.346	0.098	0.271928
GABA3	CCDC141	0.000126987	1.42202	0.615	0.416	1
GABA3	DTHD1	0.000436663	1.7364	0.269	0.086	1
K1	GRIK3	1.23085e-81	1.41957	0.938	0.107	2.97951e-77
K1	PRKCG	3.82773e-81	1.49559	0.969	0.116	9.26578e-77
K1	NRP1	7.77614e-72	1.57796	0.954	0.143	1.88237e-67
K1	NOG	6.0315e-71	1.49703	0.631	0.042	1.46004e-66
K1	TSPAN2	3.60213e-61	1.37218	0.892	0.135	8.71969e-57
K1	EGFLAM	8.21011e-59	1.48265	0.8	0.116	1.98742e-54
K1	LHX9	1.09923e-57	2.12438	0.431	0.021	2.66092e-53
K1	TCF21	5.01806e-53	1.81354	0.323	0.01	1.21472e-48
K1	FAM19A4	5.45733e-49	1.52839	0.954	0.27	1.32106e-44
K1	IQCJ	2.00784e-45	1.21175	1	0.351	4.86037e-41
K1	MYO1B	1.76161e-42	1.17719	0.954	0.339	4.26432e-38
K1	KCNK2	3.03954e-41	1.25836	0.815	0.191	7.35783e-37
K1	IL1RAPL2	3.36776e-34	1.65267	0.969	0.661	8.15235e-30
K1	FAM19A3	4.60318e-34	1.82569	0.354	0.03	1.11429e-29
K1	PTH2R	4.37208e-31	1.4406	0.523	0.087	1.05835e-26
K1	PLEKHG4B	3.38791e-28	1.31754	0.985	0.931	8.20112e-24
K1	ADGRD1	1.05383e-27	1.22783	0.569	0.12	2.55101e-23
K1	WDR63	1.25369e-22	1.17657	0.569	0.134	3.03481e-18
K1	TARID	1.78174e-20	1.21235	0.738	0.299	4.31306e-16
K1	CARTPT	3.0972e-16	1.17809	0.677	0.268	7.4974e-12
K2	PRKCG	1.27201e-42	1.25658	0.923	0.137	3.07915e-38
K2	NRP1	7.34426e-32	1.27788	0.846	0.165	1.77782e-27
K2	TSPAN2	2.54297e-31	1.23908	0.846	0.153	6.15578e-27
K2	EGFLAM	2.78034e-29	1.23167	0.744	0.133	6.73037e-25
K2	NOG	3.74983e-24	1.38466	0.487	0.06	9.07721e-20
K2	LHX9	4.82086e-23	1.35692	0.359	0.032	1.16698e-18
K2	FAM19A4	2.21033e-22	1.22717	0.872	0.288	5.35055e-18
K2	PDZRN4	7.43161e-21	1.31869	0.897	0.323	1.79897e-16
K2	KCNK2	2.77111e-20	1.29796	0.769	0.206	6.70802e-16
K2	NGF	2.88835e-17	1.21635	0.59	0.136	6.99183e-13
K2	ONECUT2	1.74989e-16	1.21872	0.41	0.064	4.23596e-12
K2	IL1RAPL2	3.59443e-16	1.42034	0.974	0.668	8.70104e-12
K2	ASCL2	1.91841e-15	1.4596	0.256	0.026	4.64389e-11
K2	PTH2R	3.31471e-14	1.19514	0.462	0.098	8.02391e-10
K2	CARTPT	4.77708e-14	1.22763	0.769	0.274	1.15639e-09
K2	CASQ2	1.17781e-12	1.19374	0.718	0.29	2.85112e-08
K2	GRB14	1.18308e-11	2.07255	0.333	0.061	2.86389e-07
K2	PNOC	1.81246e-10	1.14775	0.308	0.057	4.38742e-06
K2	TNFRSF11A	2.3563e-05	1.31533	0.282	0.095	0.570389
K2	LINC00922	0.000696298	1.345	0.385	0.184	1
MP	DCDC2C	1.1139e-174	0.621338	0.98	0.274	2.69643e-170
MP	BTNL9	8.62303e-153	0.556768	0.914	0.131	2.08738e-148
MP	ARHGEF16	9.91043e-123	0.55659	0.797	0.072	2.39902e-118
MP	ST8SIA2	1.27375e-106	0.583595	0.759	0.105	3.08338e-102
MP	OVCH2	1.10642e-95	0.579791	0.745	0.145	2.6783e-91
MP	KRT16P6	2.20966e-92	0.619412	0.673	0.066	5.34891e-88
MP	DDX55P1	8.38373e-84	0.551134	0.659	0.08	2.02945e-79
MP	LINC01013	7.34141e-79	0.597816	0.557	0.028	1.77713e-74
MP	IQSEC3P2	3.31429e-71	0.618225	0.54	0.046	8.0229e-67
MP	CHRNA6	7.65589e-65	0.539711	0.497	0.034	1.85326e-60
MP	WNT16	2.98217e-62	0.570814	0.466	0.02	7.21894e-58
MP	SNORD113-1	2.31491e-44	0.540016	0.436	0.066	5.60369e-40
MP	ESRP1	3.88774e-44	0.552311	0.449	0.083	9.41106e-40
MP	LINC00523	4.33935e-44	0.664927	0.357	0.022	1.05043e-39
MP	OR2A1	2.73628e-38	0.569236	0.316	0.018	6.62372e-34
MP	CPSF1P1	1.35484e-37	0.558998	0.368	0.052	3.27967e-33
MP	OR2F1	3.15335e-32	0.551586	0.317	0.044	7.63332e-28
MP	ABCB10P3	8.39484e-28	0.609517	0.271	0.032	2.03214e-23
MP	ABCB10P4	1.65069e-27	0.659407	0.261	0.028	3.99582e-23
MP	RTL1	2.48062e-26	0.6288	0.268	0.036	6.00483e-22
Micro	CSF3R	7.61112e-151	2.64269	0.818	0.007	1.84242e-146
Micro	C1QB	1.43476e-123	2.63137	0.727	0.008	3.47312e-119
Micro	OLFML3	1.28767e-80	2.5777	0.5	0.006	3.11706e-76
Micro	C3	3.4365e-68	2.58985	0.909	0.045	8.31874e-64
Micro	HLA-DRA	2.44079e-62	2.60515	0.818	0.04	5.90843e-58
Micro	CD86	3.23921e-60	2.62427	0.591	0.018	7.84116e-56
Micro	CASP1	6.78887e-55	2.57746	0.455	0.01	1.64338e-50
Micro	LST1	2.01226e-51	2.59783	0.364	0.006	4.87108e-47
Micro	LY86	1.55337e-50	2.65081	0.864	0.06	3.76024e-46
Micro	LPAR5	6.28956e-42	2.5783	0.591	0.029	1.52251e-37
Micro	CLEC9A	3.53636e-29	2.75453	0.273	0.008	8.56046e-25
Micro	PTGS1	2.53445e-27	2.56251	0.455	0.029	6.13514e-23
Micro	BTK	1.23213e-23	2.58615	0.409	0.027	2.98262e-19
Micro	SRGN	1.60353e-22	2.72614	0.5	0.045	3.88168e-18
Micro	BIN2	1.7762e-22	2.56945	0.455	0.036	4.29965e-18
Micro	CXCR4	6.51306e-22	2.60524	0.318	0.017	1.57662e-17
Micro	RGS1	5.48187e-20	2.68962	0.5	0.053	1.327e-15
Micro	CEACAM4	7.35603e-09	2.57393	0.364	0.057	0.000178068
Micro	FCGR2A	3.06446e-08	2.57502	0.545	0.164	0.000741814
Micro	LINC01268	2.91101e-07	2.60677	0.591	0.228	0.00704669
Astro	PLSCR4	2.15351e-71	1.8395	0.694	0.045	5.213e-67
Astro	FGFR3	1.13779e-70	1.97251	0.653	0.039	2.75424e-66
Astro	RPE65	4.14427e-49	2.22662	0.286	0.006	1.0032e-44
Astro	MASP1	1.61925e-48	2.05332	0.469	0.028	3.91971e-44
Astro	LINC01241	3.31679e-47	2.13465	0.449	0.027	8.02896e-43
Astro	LGR6	1.17477e-42	2.10975	0.449	0.032	2.84376e-38
Astro	ITGB4	2.64959e-41	2.06673	0.429	0.029	6.41386e-37
Astro	SLC22A6	8.73273e-37	2.26363	0.265	0.009	2.11393e-32
Astro	ETNPPL	1.81675e-36	1.93744	0.551	0.064	4.3978e-32
Astro	FAM151A	2.12263e-31	2.1176	0.347	0.026	5.13826e-27
Astro	LAMA1	8.34799e-30	1.99572	0.592	0.099	2.0208e-25
Astro	CCDC80	3.76783e-25	2.04257	0.408	0.05	9.12078e-21
Astro	SLC39A12	5.5341e-25	2.03786	0.469	0.072	1.33964e-20
Astro	MLC1	6.90559e-25	2.01852	0.367	0.04	1.67164e-20
Astro	LINC01354	7.16804e-24	2.10783	0.265	0.02	1.73517e-19
Astro	CYP4F12	2.50045e-22	2.07129	0.367	0.047	6.05285e-18
Astro	PLA2G5	7.06439e-19	2.09708	0.408	0.072	1.71008e-14
Astro	LINC01094	1.11038e-18	1.90977	0.857	0.438	2.6879e-14
Astro	TNC	4.03281e-15	1.86742	0.796	0.516	9.76223e-11
Astro	SLC16A9	5.0998e-15	1.88842	0.408	0.087	1.23451e-10
Oligo	FOLH1	2.03089e-166	1.46459	0.796	0.029	4.91618e-162
Oligo	CD22	5.63905e-161	1.40181	0.735	0.018	1.36505e-156
Oligo	FOLH1B	1.08478e-142	1.45005	0.735	0.035	2.62593e-138
Oligo	PI16	7.31038e-121	1.40345	0.623	0.026	1.76962e-116
Oligo	CNDP1	3.69176e-116	1.41337	0.821	0.114	8.93663e-112
Oligo	ST18	3.10409e-107	1.42079	0.877	0.182	7.51406e-103
Oligo	TMEM98	1.73392e-94	1.42681	0.519	0.026	4.19729e-90
Oligo	MOBP	7.56667e-77	1.39282	0.988	0.925	1.83166e-72
Oligo	LINC01445	1.82088e-66	1.38483	0.352	0.013	4.4078e-62
Oligo	CERCAM	1.38092e-63	1.4255	0.969	0.772	3.3428e-59
Oligo	MOG	1.07608e-59	1.36131	1	0.988	2.60488e-55
Oligo	SH3TC2	2.26383e-57	1.45995	0.772	0.303	5.48005e-53
Oligo	TMEM235	4.86351e-57	1.47678	0.309	0.012	1.17731e-52
Oligo	OR9A2	1.03505e-53	1.37589	0.444	0.056	2.50555e-49
Oligo	SLCO1A2	3.82196e-50	1.48164	0.864	0.571	9.25182e-46
Oligo	KEL	9.1191e-47	1.37923	0.358	0.036	2.20746e-42
Oligo	LLGL2	1.71302e-36	1.42166	0.284	0.03	4.1467e-32
Oligo	ITGA2	3.17655e-32	1.3949	0.901	0.802	7.68947e-28
Oligo	LINC01549	6.3923e-29	1.45668	0.296	0.048	1.54738e-24
Oligo	SLCO1B1	6.76116e-18	1.42055	0.34	0.109	1.63668e-13
OPC	FMO3	1.60486e-56	2.89518	0.5	0.014	3.88489e-52
OPC	C1QL1	8.01517e-50	2.78804	0.417	0.01	1.94023e-45
OPC	FERMT1	2.06882e-34	2.47594	0.667	0.056	5.00799e-30
OPC	VCAN	6.11403e-31	2.41826	0.75	0.089	1.48002e-26
OPC	SULF2	3.99284e-28	2.50148	0.708	0.086	9.66547e-24
OPC	PDGFRA	3.1975e-20	2.46571	0.708	0.128	7.74019e-16
OPC	SOX6	1.44228e-19	2.34359	0.875	0.22	3.49133e-15
OPC	BRINP3	3.79694e-17	2.27098	0.792	0.208	9.19124e-13
OPC	LIMS2	3.17254e-13	2.85653	0.292	0.028	7.67977e-09
OPC	STK32B	4.51699e-13	2.59053	0.792	0.3	1.09343e-08
OPC	MROH9	3.29235e-12	2.70911	0.75	0.267	7.96979e-08
OPC	PTPRZ1	2.15396e-11	2.14051	0.75	0.324	5.21408e-07
OPC	PCDH15	5.49118e-11	2.11537	0.917	0.576	1.32925e-06
OPC	FBN3	5.20504e-10	2.30292	0.375	0.064	1.25998e-05
OPC	PROM1	8.2873e-07	2.51246	0.333	0.075	0.0200611
OPC	SEMA5B	8.86773e-07	2.32781	0.292	0.057	0.0214661
OPC	COL20A1	1.10231e-06	2.03314	0.708	0.378	0.0266836
OPC	ANO3	0.00112306	2.2249	0.458	0.228	1
OPC	AOX1	0.0067781	2.1136	0.292	0.114	1
OPC	PCDHGA7	0.00763594	2.07174	0.292	0.126	1

## Sheet: Cluster_markers_mouse
cluster	gene	p_val	avg_logFC	pct.1	pct.2	p_val_adj
Chrna1	Chrnb3	9.61383e-125	1.42745	0.993	0.187	4.40006e-120
Chrna1	Pcdh20	5.6978e-115	1.51724	1	0.239	2.60777e-110
Chrna1	Chrna6	8.81297e-110	1.22385	0.986	0.194	4.03352e-105
Chrna1	Cplx3	2.81741e-104	1.36946	1	0.224	1.28947e-99
Chrna1	Otx2os1	3.55947e-101	1.39445	0.986	0.278	1.6291e-96
Chrna1	Otx2	1.46812e-99	1.29393	1	0.266	6.71927e-95
Chrna1	Lypd6	2.76528e-97	1.15336	0.993	0.266	1.26561e-92
Chrna1	Lmo1	6.89211e-81	1.3321	1	0.496	3.15438e-76
Chrna1	Slc6a1	1.15828e-79	1.28611	1	0.434	5.30123e-75
Chrna1	Plcb1	6.48198e-77	1.71942	1	0.763	2.96667e-72
Chrna1	Gad1	3.43835e-75	1.57218	1	0.462	1.57367e-70
Chrna1	Nyap2	3.5628e-71	1.49755	1	0.883	1.63062e-66
Chrna1	Unc5d	1.3273e-70	1.61293	0.993	0.619	6.07481e-66
Chrna1	Frmd5	5.4426e-68	1.1945	1	0.994	2.49097e-63
Chrna1	Cntnap5a	1.26909e-66	1.32346	0.993	0.863	5.80839e-62
Chrna1	Pcbp3	5.64434e-62	1.24486	1	0.966	2.5833e-57
Chrna1	Lrrc4c	1.83068e-60	1.33822	1	0.995	8.37863e-56
Chrna1	Prkg1	2.50598e-57	1.26889	1	0.896	1.14694e-52
Chrna1	Gpc6	7.24185e-53	1.34651	0.973	0.713	3.31445e-48
Chrna1	Robo2	2.25867e-52	1.17298	1	0.878	1.03375e-47
Chrna2	Scgn	3.15103e-206	1.65709	0.996	0.159	1.44216e-201
Chrna2	Chrna6	1.72587e-191	1.34423	0.98	0.15	7.89894e-187
Chrna2	Meis2	1.35288e-182	1.48716	1	0.233	6.19186e-178
Chrna2	Cplx3	2.19907e-168	1.33397	1	0.18	1.00647e-163
Chrna2	Otx2	1.04388e-158	1.27031	1	0.225	4.77765e-154
Chrna2	Qpct	2.56053e-141	1.24001	1	0.352	1.1719e-136
Chrna2	Synpr	2.96808e-131	1.91813	0.976	0.408	1.35843e-126
Chrna2	Reln	4.44965e-130	1.35014	0.984	0.383	2.03652e-125
Chrna2	Hcn1	3.2594e-128	1.20902	0.996	0.45	1.49176e-123
Chrna2	Trpm3	1.81344e-127	1.89822	1	0.894	8.29977e-123
Chrna2	Zfpm2	5.1136e-125	1.52946	1	0.643	2.34039e-120
Chrna2	Gad1	2.36586e-120	1.5958	1	0.431	1.08281e-115
Chrna2	Pcbp3	8.928e-120	1.44842	1	0.964	4.08617e-115
Chrna2	Nyap2	3.93289e-114	1.49437	1	0.877	1.8e-109
Chrna2	Gad2	3.42084e-110	1.26494	1	0.392	1.56565e-105
Chrna2	Prkg1	1.11722e-106	1.49429	1	0.89	5.11327e-102
Chrna2	Nrg1	7.17383e-106	1.34263	1	0.964	3.28332e-101
Chrna2	Lrrc4c	1.63369e-103	1.37198	1	0.995	7.47706e-99
Chrna2	Plcb1	1.28938e-102	1.40883	1	0.75	5.90123e-98
Chrna2	Robo2	6.93966e-91	1.38842	1	0.871	3.17614e-86
Chrna3	Scgn	5.66837e-41	1.31811	1	0.24	2.5943e-36
Chrna3	Cplx3	2.1961e-39	1.27586	1	0.259	1.00511e-34
Chrna3	Pcdh20	1.55347e-37	1.13451	1	0.273	7.10992e-33
Chrna3	Chrnb3	6.63214e-37	1.05749	0.963	0.224	3.0354e-32
Chrna3	Otx2	1.99932e-36	1.18719	1	0.299	9.15047e-32
Chrna3	Marcksl1	2.28558e-36	1.10916	1	0.443	1.04606e-31
Chrna3	Lypd6	5.19392e-36	1.11827	0.981	0.299	2.37715e-31
Chrna3	Lmo1	9.7799e-36	1.51633	1	0.519	4.47606e-31
Chrna3	Syn2	9.03972e-33	1.2711	1	0.979	4.1373e-28
Chrna3	Slc6a1	3.1676e-32	1.28982	1	0.459	1.44975e-27
Chrna3	Rnf187	4.61392e-32	1.08645	1	0.99	2.1117e-27
Chrna3	Ppp2ca	1.65453e-31	1.14082	1	0.992	7.57247e-27
Chrna3	Marcks	3.75141e-30	1.39548	1	0.884	1.71694e-25
Chrna3	Slc22a17	5.65457e-30	1.1435	1	0.999	2.58798e-25
Chrna3	Dpy19l1	1.2326e-29	1.16289	1	0.675	5.64138e-25
Chrna3	Phyhipl	1.63868e-28	1.29486	1	0.869	7.49989e-24
Chrna3	Reln	8.23362e-28	1.05556	1	0.44	3.76836e-23
Chrna3	Gad1	4.63823e-26	1.312	1	0.486	2.12283e-21
Chrna3	Pcbp3	3.84433e-23	1.11777	1	0.968	1.75947e-18
Chrna3	Trpm3	1.41764e-21	1.11466	1	0.904	6.48828e-17
GABA1	Trh	8.72306e-209	2.65003	1	0.034	3.99237e-204
GABA1	Six3	8.17144e-124	1.46308	1	0.081	3.73991e-119
GABA1	Sst	1.02184e-63	2.61616	0.926	0.152	4.67674e-59
GABA1	Hs3st4	7.6311e-45	1.98333	1	0.364	3.4926e-40
GABA1	Ubash3b	3.05792e-44	1.66066	1	0.393	1.39955e-39
GABA1	Pvalb	2.76945e-40	3.19538	1	0.514	1.26752e-35
GABA1	Kcnip1	1.20679e-37	1.24748	1	0.4	5.52321e-33
GABA1	Nxph1	3.46559e-36	1.40215	1	0.376	1.58613e-31
GABA1	Rgs6	5.66078e-36	1.33758	0.981	0.466	2.59083e-31
GABA1	Esrrg	1.01939e-35	1.70682	1	0.867	4.66556e-31
GABA1	Erbb4	1.75992e-34	1.3201	1	0.441	8.05481e-30
GABA1	Gpx1	2.65594e-34	1.28797	1	0.99	1.21557e-29
GABA1	Gabra3	1.46681e-33	1.23393	1	0.522	6.71331e-29
GABA1	Slc35f1	4.8123e-33	1.43528	1	0.939	2.2025e-28
GABA1	Galntl6	1.10459e-31	1.87273	1	0.825	5.05548e-27
GABA1	Dgkb	2.2707e-31	1.54147	1	0.76	1.03925e-26
GABA1	Serpini1	3.0903e-31	1.71006	1	0.883	1.41437e-26
GABA1	Ak5	1.8713e-30	1.26208	1	0.841	8.56457e-26
GABA1	Dmd	1.3292e-26	1.31572	1	0.974	6.08348e-22
GABA1	Kirrel3	4.99696e-24	1.89947	0.889	0.567	2.28701e-19
GABA2	Isl1	8.35194e-123	1.26414	0.962	0.031	3.82251e-118
GABA2	Cnr1	2.59079e-35	1.31542	0.962	0.164	1.18575e-30
GABA2	Cartpt	2.17846e-33	1.44947	0.846	0.12	9.97036e-29
GABA2	Rmst	2.8217e-27	1.23249	1	0.217	1.29144e-22
GABA2	Pax6	8.67027e-27	1.48304	1	0.292	3.96821e-22
GABA2	Sphkap	3.0228e-26	1.29884	1	0.26	1.38348e-21
GABA2	Fxyd6	1.56048e-21	1.50995	1	0.297	7.14199e-17
GABA2	Plcxd3	8.27006e-18	1.33588	1	0.818	3.78504e-13
GABA2	Nap1l5	1.68308e-17	1.44672	1	0.998	7.70311e-13
GABA2	Zwint	2.2865e-16	1.1214	1	0.996	1.04649e-11
GABA2	6330403K07Rik	2.34782e-16	1.23211	1	0.496	1.07455e-11
GABA2	Aldoc	3.14638e-16	1.48328	1	0.666	1.44003e-11
GABA2	Htr2c	3.96064e-16	1.27498	0.923	0.357	1.81271e-11
GABA2	Zcchc12	6.45485e-16	1.41101	1	0.715	2.95425e-11
GABA2	A730017C20Rik	7.82188e-16	1.13211	1	0.829	3.57992e-11
GABA2	Fam19a1	9.81296e-16	1.34165	1	0.618	4.49119e-11
GABA2	Tmem130	1.31914e-14	1.13627	1	0.964	6.03746e-10
GABA2	Gad2	8.6607e-14	1.18346	1	0.457	3.96383e-09
GABA2	Gpc6	3.46551e-13	1.25541	1	0.727	1.58609e-08
GABA2	Asic2	3.03825e-12	1.26474	1	0.938	1.39055e-07
GABA3	Rmst	7.89203e-43	1.27772	1	0.211	3.61202e-38
GABA3	Nxph1	1.41507e-33	2.01129	1	0.379	6.47649e-29
GABA3	Pcdh15	4.64492e-27	2.33563	1	0.934	2.12589e-22
GABA3	Dab1	1.41395e-26	1.71537	1	0.885	6.47135e-22
GABA3	Dgkb	6.67633e-26	1.76199	1	0.761	3.05562e-21
GABA3	Galnt13	6.2772e-25	1.54837	1	0.921	2.87295e-20
GABA3	Cacna2d3	1.19276e-24	1.34697	1	0.764	5.45905e-20
GABA3	2021-03-01	1.36166e-24	1.45457	1	0.672	6.23205e-20
GABA3	Chl1	8.00176e-24	1.36928	1	0.911	3.66224e-19
GABA3	Khdrbs2	9.57066e-24	1.23443	1	0.954	4.3803e-19
GABA3	Npas3	4.04531e-23	1.58212	1	0.76	1.85146e-18
GABA3	Lphn2	2.72832e-22	1.51991	0.976	0.784	1.2487e-17
GABA3	Unc5d	3.27131e-22	1.51499	1	0.638	1.49721e-17
GABA3	Pcdh11x	4.50726e-22	1.31466	1	0.741	2.06288e-17
GABA3	Dmd	4.56553e-22	1.45748	1	0.974	2.08955e-17
GABA3	1700019L22Rik	2.27225e-21	1.56514	0.976	0.883	1.03996e-16
GABA3	Cntnap2	1.72908e-19	1.22396	1	0.985	7.91367e-15
GABA3	Robo2	1.56926e-18	1.31502	1	0.884	7.18219e-14
GABA3	Mgat4c	3.67718e-17	1.24114	1	0.804	1.68297e-12
GABA3	Gm32647	7.63824e-16	1.33222	0.952	0.868	3.49587e-11
GABA4	Ldb2	7.84299e-22	1.14554	1	0.231	3.58958e-17
GABA4	Penk	8.05584e-22	3.34598	0.737	0.103	3.687e-17
GABA4	Caln1	3.93824e-17	1.56322	1	0.398	1.80245e-12
GABA4	Rgs10	7.47024e-17	1.05335	0.947	0.265	3.41898e-12
GABA4	Calb2	2.73802e-16	1.1891	1	0.281	1.25314e-11
GABA4	Syne2	9.15757e-14	1.18542	1	0.559	4.19124e-09
GABA4	Resp18	8.57661e-13	1.63533	1	0.962	3.92534e-08
GABA4	6330403K07Rik	9.18144e-13	1.2458	1	0.497	4.20216e-08
GABA4	Gm32647	2.5386e-12	1.9388	1	0.868	1.16186e-07
GABA4	Grm8	1.10247e-11	1.08862	1	0.742	5.04576e-07
GABA4	Nap1l5	7.97045e-11	1.10409	1	0.998	3.64792e-06
GABA4	Pcsk1n	9.01103e-11	1.20157	1	0.996	4.12417e-06
GABA4	Map1lc3a	1.00577e-10	1.0141	1	0.991	4.60321e-06
GABA4	Ahi1	1.09742e-10	1.10221	1	0.988	5.02266e-06
GABA4	Podxl2	1.54555e-10	1.20118	1	0.857	7.07369e-06
GABA4	Mgat4c	8.46058e-10	1.0854	1	0.806	3.87224e-05
GABA4	Vgf	3.58936e-09	1.32943	0.947	0.866	0.000164278
GABA4	Scg2	5.26676e-09	1.0578	1	0.97	0.000241049
GABA4	Gpx3	4.78813e-08	1.05675	0.684	0.243	0.00219143
GABA4	Gpc5	1.7593e-07	1.15092	0.947	0.863	0.00805197
GABA5	Rmst	1.50735e-102	1.21604	0.921	0.183	6.89884e-98
GABA5	Fxyd6	3.69132e-67	1.20166	0.898	0.268	1.68944e-62
GABA5	6330403K07Rik	3.30698e-62	1.14952	0.992	0.471	1.51354e-57
GABA5	Nap1l5	1.85902e-60	1.19049	1	0.997	8.50838e-56
GABA5	Rtn1	7.71862e-60	0.980187	1	0.983	3.53266e-55
GABA5	Ahi1	5.5595e-56	1.12599	0.992	0.987	2.54447e-51
GABA5	A730017C20Rik	1.94007e-54	0.970043	0.969	0.822	8.87931e-50
GABA5	Resp18	2.2517e-54	1.21149	0.984	0.961	1.03056e-49
GABA5	Syt4	2.3998e-52	0.934269	0.984	0.763	1.09834e-47
GABA5	Tmem130	4.29267e-51	1.04429	0.992	0.963	1.96467e-46
GABA5	Pnck	7.31689e-48	0.94957	0.976	0.9	3.34879e-43
GABA5	Zcchc12	4.24544e-47	1.06033	0.976	0.702	1.94305e-42
GABA5	Grm8	4.76157e-45	1.16592	0.945	0.732	2.17927e-40
GABA5	Sst	1.90452e-41	1.53163	0.583	0.145	8.71659e-37
GABA5	Serpine2	7.58307e-41	0.925474	0.906	0.606	3.47062e-36
GABA5	Htr2c	6.81122e-39	0.965922	0.764	0.339	3.11736e-34
GABA5	Pcsk1n	3.08558e-37	1.04625	1	0.995	1.41221e-32
GABA5	Lrrtm4	3.21636e-34	1.05513	0.961	0.749	1.47206e-29
GABA5	1700019L22Rik	6.02455e-27	1.14669	0.929	0.882	2.75731e-22
GABA5	Il1rapl2	1.6443e-17	0.977383	0.717	0.6	7.52563e-13
GABA6	AW551984	4.9777e-139	1.21673	0.976	0.088	2.2782e-134
GABA6	Cbln4	1.83454e-78	1.1147	0.939	0.182	8.39631e-74
GABA6	Penk	8.89487e-76	2.20786	0.695	0.085	4.071e-71
GABA6	Fxyd6	1.96557e-67	1.72001	1	0.278	8.99601e-63
GABA6	6330403K07Rik	6.59701e-54	1.49322	1	0.482	3.01932e-49
GABA6	Gap43	4.1352e-48	1.07996	1	0.974	1.8926e-43
GABA6	Nxph1	1.91123e-47	1.17783	0.976	0.368	8.7473e-43
GABA6	Ahi1	2.13537e-47	1.3988	1	0.987	9.77315e-43
GABA6	Zcchc12	3.4445e-47	1.46745	1	0.707	1.57648e-42
GABA6	Zwint	2.3264e-45	1.08445	1	0.996	1.06475e-40
GABA6	Nap1l5	5.02967e-45	1.26544	1	0.998	2.30198e-40
GABA6	A730017C20Rik	5.41013e-44	1.0796	1	0.824	2.47611e-39
GABA6	Resp18	1.22477e-42	1.36397	1	0.961	5.60551e-38
GABA6	Tmem130	4.41545e-42	1.19298	1	0.963	2.02086e-37
GABA6	Scg2	2.6342e-37	1.22135	1	0.97	1.20562e-32
GABA6	Gm32647	4.51359e-34	2.03886	0.976	0.865	2.06578e-29
GABA6	Rab3b	1.99262e-31	1.56989	0.793	0.335	9.11982e-27
GABA6	Calb2	1.18516e-24	1.09618	0.707	0.271	5.42426e-20
GABA6	Thsd7b	8.57285e-21	1.25526	0.829	0.56	3.92362e-16
GABA6	Npy	6.80979e-11	2.48868	0.341	0.118	3.1167e-06
LGv	Neurod6	2.06936e-267	1.47113	1	0.005	9.47107e-263
LGv	Lamp5	4.14883e-53	2.01317	1	0.061	1.89883e-48
LGv	Arc	2.64965e-38	1.96735	1	0.09	1.21269e-33
LGv	S100a10	1.09209e-34	1.43407	1	0.103	4.99829e-30
LGv	Nrgn	4.03647e-15	2.74724	1	0.343	1.84741e-10
LGv	Snca	1.3932e-13	2.50092	1	0.424	6.37639e-09
LGv	Stx1a	1.71385e-12	1.83299	1	0.528	7.84397e-08
LGv	Phactr1	4.30348e-12	1.65873	1	0.546	1.96962e-07
LGv	Nrn1	8.48075e-12	1.43242	1	0.604	3.88147e-07
LGv	Egr1	1.2713e-11	1.92072	1	0.684	5.81847e-07
LGv	B2m	1.86293e-11	1.73051	1	0.734	8.52624e-07
LGv	1110008P14Rik	2.34564e-11	1.58751	1	0.967	1.07355e-06
LGv	Arpp19	2.34725e-11	1.91394	1	0.983	1.07429e-06
LGv	Mef2c	2.35753e-11	1.57092	1	0.911	1.079e-06
LGv	Homer1	2.36375e-11	1.68881	1	0.896	1.08184e-06
LGv	Camk2n1	2.46355e-11	1.91234	1	0.965	1.12752e-06
LGv	R3hdm1	2.71251e-11	1.64428	1	0.994	1.24146e-06
LGv	Olfm1	4.19657e-11	1.43049	1	0.977	1.92069e-06
LGv	Tcf4	8.20006e-11	1.59256	1	0.734	3.753e-06
LGv	Cacna2d3	1.59003e-10	1.48768	1	0.767	7.27723e-06
LP	Gtf2a1l	5.35686e-125	0.764565	0.964	0.279	2.45173e-120
LP	Defb1	6.84914e-116	0.828883	0.711	0.12	3.13471e-111
LP	Necab1	9.69479e-104	1.66214	0.964	0.486	4.43711e-99
LP	Calb2	5.61375e-99	2.31968	0.84	0.232	2.5693e-94
LP	Calb1	2.50581e-95	1.79685	0.99	0.58	1.14686e-90
LP	Ptk2b	7.95784e-87	0.77761	0.99	0.605	3.64214e-82
LP	Ccdc136	5.082e-86	0.907138	1	0.931	2.32593e-81
LP	Gpr4	1.12997e-85	0.864515	0.923	0.458	5.17166e-81
LP	Fxyd7	2.21536e-80	0.79256	0.995	0.72	1.01393e-75
LP	Tcf7l2	2.23471e-69	0.74424	1	0.725	1.02278e-64
LP	Cnih2	7.49716e-68	0.718414	1	0.928	3.4313e-63
LP	Cpne7	6.89398e-67	0.714781	0.99	0.704	3.15524e-62
LP	Ramp3	1.4756e-66	0.825789	1	0.629	6.7535e-62
LP	Kirrel3	4.53481e-65	1.19326	0.938	0.539	2.07549e-60
LP	Ywhah	4.22005e-61	0.948912	0.995	0.988	1.93143e-56
LP	Epha6	5.13562e-60	0.811865	0.99	0.949	2.35047e-55
LP	Slc17a6	3.38116e-51	0.710297	1	0.576	1.54749e-46
LP	Rgs4	4.71609e-46	0.744048	1	0.893	2.15846e-41
LP	Cck	1.74779e-43	0.714376	0.995	0.673	7.99927e-39
LP	Cox6a2	7.5657e-38	0.827646	0.861	0.548	3.46267e-33
LGd	Plekhg1	0	1.70126	1	0.409	0
LGd	Kcnc2	0	1.67424	1	0.845	0
LGd	Rasgrp1	0	1.61216	1	0.413	0
LGd	Cacna1c	0	1.30813	1	0.957	0
LGd	Tnnt1	5.40604e-307	1.39236	1	0.582	2.47424e-302
LGd	Adarb2	6.0824e-307	1.70062	1	0.836	2.78379e-302
LGd	Hs6st3	1.43229e-306	1.50748	1	0.786	6.55531e-302
LGd	Ntng1	3.12501e-299	1.65605	1	0.739	1.43026e-294
LGd	Pcp4	4.66706e-299	1.70743	1	0.91	2.13602e-294
LGd	Synpo2	2.53245e-298	1.37435	1	0.608	1.15905e-293
LGd	Slc24a2	1.09511e-297	1.38635	1	0.944	5.01212e-293
LGd	Ptpn4	3.10402e-294	1.36562	1	0.978	1.42065e-289
LGd	Rbfox1	4.11821e-293	1.55588	1	0.917	1.88482e-288
LGd	Cacna2d1	2.46878e-291	1.24492	1	0.463	1.12991e-286
LGd	Pdp1	2.44309e-281	1.37658	1	0.862	1.11816e-276
LGd	Lrrc7	3.91438e-275	1.28662	1	0.956	1.79154e-270
LGd	Prkcd	3.64554e-273	1.71247	1	0.38	1.66849e-268
LGd	Kcnip4	9.32046e-271	1.44502	1	0.956	4.26579e-266
LGd	Zfp804a	1.69934e-270	1.3098	1	0.694	7.77755e-266
LGd	Gabra4	4.29187e-247	1.27104	1	0.619	1.9643e-242
Oligo1	Ermn	1.72782e-208	3.22809	1	0.033	7.90788e-204
Oligo1	Opalin	6.05739e-204	3.03262	0.943	0.029	2.77235e-199
Oligo1	Mobp	1.41721e-122	4.03712	1	0.08	6.48628e-118
Oligo1	Cryab	1.1379e-106	3.71206	1	0.099	5.20795e-102
Oligo1	Mag	1.65359e-99	3.50956	1	0.109	7.56813e-95
Oligo1	Gatm	3.27605e-94	3.32307	1	0.118	1.49938e-89
Oligo1	Apod	3.71147e-81	3.87065	1	0.147	1.69867e-76
Oligo1	Ugt8a	9.46496e-68	2.91219	1	0.19	4.33192e-63
Oligo1	Trf	2.13635e-60	4.73373	1	0.23	9.77765e-56
Oligo1	Mog	1.29669e-58	3.68759	1	0.241	5.93471e-54
Oligo1	Mal	5.45131e-56	4.03648	1	0.259	2.49496e-51
Oligo1	Plp1	7.21161e-56	5.27469	1	0.26	3.30061e-51
Oligo1	Mbp	6.06088e-45	4.07578	1	0.377	2.77394e-40
Oligo1	Enpp2	3.48243e-43	3.63302	1	0.416	1.59384e-38
Oligo1	Car2	1.20578e-39	4.08672	1	0.512	5.51863e-35
Oligo1	Cnp	3.49638e-39	3.9785	1	0.518	1.60022e-34
Oligo1	Tspan2	9.66114e-36	3.10887	1	0.789	4.42171e-31
Oligo1	2021-09-04	1.42462e-35	2.91531	1	0.945	6.5202e-31
Oligo1	Qdpr	1.46178e-35	3.27554	1	0.979	6.69029e-31
Oligo1	Ptgds	1.58581e-28	4.89228	0.943	0.64	7.25795e-24
Oligo2	Tmem100	4.2773e-223	2.34094	1	0.015	1.95763e-218
Oligo2	Neu4	2.4133e-195	2.46087	1	0.019	1.10452e-190
Oligo2	Pdgfra	3.7122e-163	2.78664	1	0.026	1.699e-158
Oligo2	Gpr37l1	1.73068e-131	2.73369	1	0.035	7.92098e-127
Oligo2	Olig1	8.28802e-100	2.4396	1	0.051	3.79326e-95
Oligo2	Vcan	2.47376e-72	2.76991	1	0.081	1.13219e-67
Oligo2	Cd9	1.86599e-56	2.52073	1	0.107	8.54026e-52
Oligo2	S100a1	2.13637e-47	2.27853	1	0.139	9.77773e-43
Oligo2	Sox6	3.24466e-39	2.53128	1	0.184	1.48501e-34
Oligo2	S100a16	3.16378e-38	2.57972	1	0.189	1.448e-33
Oligo2	Xylt1	8.25211e-35	2.23582	1	0.215	3.77683e-30
Oligo2	Apoe	1.43185e-30	2.57861	1	0.258	6.55329e-26
Oligo2	Nxph1	6.31908e-23	2.17209	1	0.384	2.89211e-18
Oligo2	Bcan	3.39179e-21	2.2927	1	0.557	1.55235e-16
Oligo2	Serpine2	8.45888e-21	2.91431	1	0.619	3.87146e-16
Oligo2	Ptprz1	4.55984e-20	2.79372	1	0.744	2.08695e-15
Oligo2	Lhfpl3	8.2582e-20	2.48025	1	0.867	3.77961e-15
Oligo2	Tnr	1.95259e-19	2.25887	1	0.915	8.93663e-15
Oligo2	Dbi	4.04499e-19	2.28747	1	0.994	1.85131e-14
Oligo2	Pcdh15	8.87043e-19	2.23938	1	0.934	4.05982e-14
Oligo3	Gpr17	4.27079e-72	3.27611	1	0.033	1.95466e-67
Oligo3	9630013A20Rik	7.7292e-57	2.69348	1	0.044	3.5375e-52
Oligo3	Gpr37l1	9.3602e-57	2.45255	1	0.043	4.28398e-52
Oligo3	Gjc3	1.04875e-40	2.5263	1	0.064	4.79992e-36
Oligo3	Bcas1	2.82361e-37	3.46804	1	0.074	1.29231e-32
Oligo3	Lims2	3.5758e-34	3.00557	1	0.081	1.63657e-29
Oligo3	Cd9	3.36919e-26	3.82112	1	0.114	1.54201e-21
Oligo3	S100a1	2.45596e-21	2.52704	1	0.146	1.12404e-16
Oligo3	S100b	3.54151e-19	2.7123	1	0.172	1.62088e-14
Oligo3	Enpp6	4.82599e-16	3.47477	0.833	0.133	2.20876e-11
Oligo3	Plp1	5.75745e-13	2.74207	1	0.274	2.63507e-08
Oligo3	Mbp	4.40638e-11	3.1704	1	0.389	2.01671e-06
Oligo3	Mpzl1	6.63775e-10	3.2739	1	0.602	3.03797e-05
Oligo3	Cnp	1.00876e-09	2.92701	1	0.528	4.61688e-05
Oligo3	Epb4.1l2	1.09379e-09	2.55513	1	0.665	5.00604e-05
Oligo3	Fyn	2.21151e-09	2.95339	1	0.963	0.000101216
Oligo3	Sirt2	2.2506e-09	3.48517	1	0.964	0.000103005
Oligo3	Tnr	2.54692e-09	2.65079	1	0.916	0.000116568
Oligo3	Qk	4.98735e-09	2.53813	1	0.772	0.000228261
Oligo3	Chn2	3.75728e-07	2.65638	0.917	0.731	0.0171963
